# Supplementary material for: A new insight into RecA filament regulation by RecX from the analysis of conformation-specific interactions
Source: eLife. 2022 Jun 22;11:e78409. doi: 10.7554/eLife.78409 (PMC9252578; doi:10.7554/eLife.78409)
Supplement: Figure 1—figure supplement 1—source data 1. [file elife-78409-fig1-figsupp1-data1.xlsx]

## Sheet: 1
	Time, s	Length, µm
	0	2.0843
	0.037	2.1701
	0.08	2.2708
	0.123	2.3561
	0.159	2.4418
	0.193	2.5409
	0.228	2.6125
	0.266	2.6759
	0.305	2.7535
	0.34	2.7898
	0.375	2.8111
	0.41	2.8203
	0.445	2.8325
	0.48	2.8418
	0.515	2.8497
	0.55	2.8556
	0.585	2.8571
	0.62	2.8541
	0.655	2.8771
	0.691	2.8823
	0.727	2.8778
	0.761	2.9032
	0.797	2.9282
	0.832	2.9678
	0.867	2.9684
	0.9021	2.9714
	0.9371	2.9834
	0.9731	3.0263
	1.0091	3.0589
	1.0441	3.0608
	1.0791	3.0789
	1.1151	3.1031
	1.1501	3.1176
	1.1861	3.1311
	1.2221	3.1346
	1.2571	3.1658
	1.2931	3.2051
	1.3281	3.208
	1.3621	3.2372
	1.3971	3.2522
	1.4331	3.2852
	1.4671	3.3087
	1.5031	3.3387
	1.5381	3.3614
	1.5731	3.3814
	1.6071	3.3883
	1.6421	3.4128
	1.6771	3.4374
	1.7121	3.4438
	1.7471	3.462
	1.7821	3.4941
	1.8171	3.5209
	1.8541	3.5473
	1.8901	3.5392
	1.9241	3.5556
	1.9591	3.5904
	1.9941	3.6003
	2.0291	3.6194
	2.0641	3.6293
	2.1001	3.6608
	2.1351	3.7027
	2.1711	3.7073
	2.2061	3.737
	2.2421	3.7523
	2.2771	3.7638
	2.3121	3.7778
	2.3471	3.7822
	2.3831	3.801
	2.4191	3.8133
	2.4541	3.8161
	2.4901	3.8382
	2.5261	3.8635
	2.5621	3.8683
	2.5981	3.8806
	2.6342	3.8919
	2.6702	3.9074
	2.7062	3.9131
	2.7402	3.9195
	2.7752	3.9288
	2.8112	3.9328
	2.8452	3.94
	2.8802	3.9386
	2.9152	3.9631
	2.9502	3.9482
	2.9862	3.9461
	3.0212	3.956
	3.0562	3.959
	3.0912	3.9837
	3.1272	3.9933
	3.1622	3.9889
	3.1972	3.9873
	3.2312	3.9985
	3.2662	4.0138
	3.3042	4.0198
	3.3392	4.0447
	3.3752	4.0414
	3.4102	4.0501
	3.4442	4.0618
	3.4792	4.0747
	3.5152	4.0818
	3.5512	4.0799
	3.5862	4.0872
	3.6212	4.0855
	3.6562	4.097
	3.6922	4.1041
	3.7262	4.1156
	3.7612	4.0992
	3.7972	4.1052
	3.8332	4.1081
	3.8682	4.1141
	3.9042	4.1061
	3.9382	4.118
	3.9742	4.146
	4.0082	4.1567
	4.0442	4.1574
	4.0782	4.1566
	4.1142	4.1783
	4.1482	4.1919
	4.1832	4.1752
	4.2182	4.1801
	4.2532	4.1917
	4.2882	4.2001
	4.3232	4.2362
	4.3592	4.2468
	4.3953	4.251
	4.4313	4.2511
	4.4663	4.2469
	4.5013	4.2586
	4.5363	4.2687
	4.5713	4.2704
	4.6063	4.2649
	4.6413	4.2747
	4.6763	4.28
	4.7113	4.2872
	4.7463	4.2821
	4.7823	4.2816
	4.8173	4.2832
	4.8523	4.2867
	4.8873	4.2789
	4.9233	4.2878
	4.9573	4.2942
	4.9923	4.2973
	5.0273	4.2899
	5.0623	4.284
	5.0983	4.2916
	5.1333	4.2925
	5.1683	4.3135
	5.2033	4.3238
	5.2383	4.3292
	5.2733	4.3227
	5.3083	4.3293
	5.3443	4.3347
	5.3803	4.3485
	5.4163	4.359
	5.4503	4.3549
	5.4853	4.3776
	5.5203	4.3731
	5.5553	4.3982
	5.5903	4.4194
	5.6263	4.4369
	5.6623	4.4386
	5.6973	4.4355
	5.7323	4.4393
	5.7673	4.4366
	5.8023	4.4385
	5.8373	4.4722
	5.8723	4.4779
	5.9073	4.4698
	5.9433	4.4845
	5.9783	4.4839
	6.0143	4.4651
	6.0503	4.462
	6.0843	4.4701
	6.1194	4.4807
	6.1544	4.491
	6.1894	4.4895
	6.2254	4.4969
	6.2614	4.526
	6.2994	4.518
	6.3344	4.5199
	6.3704	4.5202
	6.4054	4.5219
	6.4414	4.5346
	6.4774	4.5576
	6.5124	4.5719
	6.5474	4.5864
	6.5834	4.5917
	6.6174	4.5915
	6.6534	4.6039
	6.6894	4.6178
	6.7254	4.6165
	6.7604	4.6205
	6.7944	4.6233
	6.8294	4.6242
	6.8644	4.6218
	6.8994	4.6231
	6.9344	4.6306
	6.9704	4.6304
	7.0044	4.6443
	7.0394	4.6357
	7.0754	4.6289
	7.1114	4.6272
	7.1454	4.6318
	7.1814	4.6327
	7.2154	4.6398
	7.2504	4.6513
	7.2854	4.6548
	7.3204	4.6719
	7.3564	4.6668
	7.3924	4.6723
	7.4274	4.6953
	7.4624	4.6853
	7.4984	4.685
	7.5334	4.685
	7.5674	4.6742
	7.6024	4.6758
	7.6374	4.688
	7.6724	4.6873
	7.7084	4.6788
	7.7424	4.6899
	7.7774	4.6832
	7.8124	4.6902
	7.8484	4.7051
	7.8825	4.6939
	7.9175	4.6981
	7.9535	4.688
	7.9885	4.6774
	8.0245	4.6903
	8.0595	4.6901
	8.0945	4.6935
	8.1295	4.6956
	8.1645	4.6994
	8.2005	4.6994
	8.2355	4.7047
	8.2705	4.7025
	8.3065	4.7015
	8.3415	4.6883
	8.3765	4.705
	8.4125	4.7096
	8.4465	4.7199
	8.4825	4.7325
	8.5185	4.7325
	8.5535	4.7298
	8.5895	4.733
	8.6245	4.7354
	8.6595	4.7431
	8.6945	4.738
	8.7295	4.7401
	8.7655	4.7606
	8.8015	4.7487
	8.8365	4.7418
	8.8715	4.7452
	8.9065	4.7444
	8.9415	4.7459
	8.9765	4.7558
	9.0115	4.7579
	9.0465	4.7533
	9.0815	4.7531
	9.1175	4.7392
	9.1525	4.7526
	9.1885	4.7631
	9.2225	4.7607
	9.2575	4.7575
	9.2925	4.7563
	9.3275	4.7641
	9.3635	4.7525
	9.3975	4.7656
	9.4345	4.7647
	9.4705	4.7533
	9.5065	4.7579
	9.5415	4.7545
	9.5775	4.761
	9.6115	4.7626
	9.6466	4.7668
	9.6826	4.7591
	9.7166	4.7575
	9.7516	4.7603
	9.7876	4.7652
	9.8236	4.764
	9.8576	4.756
	9.8926	4.7658
	9.9276	4.7647
	9.9626	4.7641
	9.9986	4.7686
	10.0326	4.7768
	10.0686	4.7732
	10.1036	4.7813
	10.1396	4.7746
	10.1736	4.779
	10.2086	4.7593
	10.2436	4.7703
	10.2786	4.7778
	10.3146	4.7715
	10.3496	4.7841
	10.3856	4.7955
	10.4196	4.7938
	10.4546	4.7964
	10.4906	4.784
	10.5266	4.8072
	10.5616	4.807
	10.5986	4.7975
	10.6336	4.8064
	10.6686	4.8087
	10.7036	4.819
	10.7386	4.808
	10.7736	4.8007
	10.8086	4.7953
	10.8436	4.8231
	10.8796	4.8058
	10.9146	4.8081
	10.9506	4.8019
	10.9856	4.7988
	11.0206	4.8024
	11.0566	4.8026
	11.0916	4.8081
	11.1256	4.8056
	11.1606	4.8072
	11.1966	4.8024
	11.2306	4.8061
	11.2666	4.8164
	11.3026	4.8116
	11.3366	4.8135
	11.3717	4.8192
	11.4067	4.8371
	11.4417	4.8324
	11.4777	4.834
	11.5137	4.8321
	11.5487	4.8428
	11.5847	4.8367
	11.6197	4.8481
	11.6557	4.8292
	11.6917	4.8309
	11.7277	4.8502
	11.7637	4.8471
	11.7997	4.8426
	11.8357	4.8458
	11.8707	4.8452
	11.9057	4.8563
	11.9397	4.852
	11.9747	4.8588
	12.0097	4.8533
	12.0447	4.8685
	12.0807	4.8536
	12.1167	4.8531
	12.1507	4.8504
	12.1857	4.8494
	12.2207	4.8462
	12.2567	4.8556
	12.2907	4.8624
	12.3267	4.8488
	12.3627	4.8451
	12.3977	4.8509
	12.4317	4.8628
	12.4667	4.8834
	12.5017	4.9094
	12.5377	4.8973
	12.5727	4.8928
	12.6077	4.9094
	12.6427	4.911
	12.6787	4.9132
	12.7137	4.9119
	12.7487	4.9028
	12.7837	4.9418
	12.8187	4.9472
	12.8537	4.9468
	12.8897	4.9466
	12.9247	4.9502
	12.9597	4.9583
	12.9957	4.9559
	13.0307	4.9686
	13.0667	4.9605
	13.1017	4.9747
	13.1378	4.9686
	13.1728	4.9697
	13.2088	4.9777
	13.2448	4.9843
	13.2808	4.9822
	13.3148	4.9787
	13.3498	4.976
	13.3858	4.9931
	13.4198	4.9999
	13.4548	4.9926
	13.4908	4.9903
	13.5268	5.0001
	13.5648	5.0009
	13.5998	4.9985
	13.6348	5.0009
	13.6698	5.0185
	13.7058	5.0131
	13.7408	5.0072
	13.7768	5.0089
	13.8118	5.0142
	13.8468	5.0087
	13.8818	5.0254
	13.9168	5.0239
	13.9528	5.0239
	13.9878	5.0198
	14.0228	5.0265
	14.0588	5.0245
	14.0948	5.0261
	14.1288	5.0266
	14.1638	5.0307
	14.1988	5.0327
	14.2338	5.0431
	14.2688	5.0331
	14.3038	5.0368
	14.3398	5.0335
	14.3758	5.0376
	14.4108	5.0378
	14.4468	5.0325
	14.4818	5.0357
	14.5168	5.0463
	14.5528	5.0419
	14.5878	5.0391
	14.6238	5.0302
	14.6588	5.0314
	14.6938	5.0316
	14.7288	5.0304
	14.7638	5.0332
	14.7998	5.0339
	14.8338	5.0246
	14.8689	5.0286
	14.9049	5.0323
	14.9409	5.0334
	14.9749	5.0298
	15.0099	5.0312
	15.0449	5.0281
	15.0809	5.0252
	15.1149	5.0198
	15.1499	5.039
	15.1859	5.0349
	15.2209	5.0326
	15.2569	5.0336
	15.2919	5.0261
	15.3269	5.0307
	15.3619	5.0243
	15.3969	5.0195
	15.4329	5.0172
	15.4669	5.0242
	15.5029	5.0331
	15.5369	5.0381
	15.5729	5.026
	15.6079	5.033
	15.6439	5.027
	15.6789	5.0312
	15.7139	5.0283
	15.7499	5.0281
	15.7849	5.0354
	15.8199	5.0274
	15.8549	5.036
	15.8899	5.0428
	15.9249	5.0485
	15.9609	5.0461
	15.9949	5.0403
	16.0299	5.045
	16.0649	5.0449
	16.1009	5.0375
	16.1359	5.0372
	16.1719	5.0386
	16.2059	5.0425
	16.2409	5.0387
	16.2759	5.0441
	16.3109	5.0457
	16.3459	5.0505
	16.3809	5.051
	16.4169	5.0451
	16.4529	5.0526
	16.4879	5.0568
	16.5219	5.0506
	16.5569	5.0435
	16.5919	5.0492
	16.628	5.0446
	16.664	5.0538
	16.701	5.0533
	16.736	5.0677
	16.772	5.0556
	16.808	5.0539
	16.844	5.0579
	16.879	5.0628
	16.915	5.0554
	16.951	5.0634
	16.986	5.0711
	17.022	5.0789
	17.057	5.0699
	17.092	5.0759
	17.127	5.0779
	17.162	5.0699
	17.197	5.0709
	17.233	5.0655
	17.269	5.0691
	17.303	5.0678
	17.338	5.0731
	17.373	5.0776
	17.408	5.07
	17.443	5.0726
	17.478	5.0703
	17.514	5.0608
	17.549	5.071
	17.585	5.0695
	17.621	5.0737
	17.656	5.0779
	17.69	5.0773
	17.725	5.0764
	17.761	5.0881
	17.795	5.0762
	17.831	5.0689
	17.866	5.0688
	17.901	5.0826
	17.935	5.0804
	17.97	5.0887
	18.005	5.078
	18.04	5.085
	18.075	5.0852
	18.11	5.078
	18.146	5.0759
	18.182	5.0849
	18.217	5.0922
	18.251	5.0923
	18.287	5.0769
	18.321	5.0879
	18.3561	5.0812
	18.3911	5.0748
	18.4261	5.081
	18.4621	5.0913
	18.4991	5.0811
	18.5331	5.085
	18.5681	5.0722
	18.6041	5.0811
	18.6391	5.0811
	18.6741	5.0725
	18.7101	5.0826
	18.7451	5.0797
	18.7811	5.0788
	18.8161	5.0824
	18.8511	5.099
	18.8861	5.0905
	18.9221	5.1022
	18.9571	5.1022
	18.9931	5.1021
	19.0291	5.0921
	19.0641	5.0918
	19.1001	5.0977
	19.1341	5.0884
	19.1691	5.1015
	19.2041	5.1017
	19.2381	5.0916
	19.2741	5.0939
	19.3081	5.0975
	19.3431	5.0958
	19.3791	5.0975
	19.4141	5.0929
	19.4491	5.1022
	19.4851	5.1045
	19.5191	5.1012
	19.5541	5.1064
	19.5891	5.1073
	19.6251	5.1139
	19.6601	5.113
	19.6961	5.1116
	19.7321	5.1089
	19.7661	5.1103
	19.8011	5.1112
	19.8371	5.112
	19.8721	5.1081
	19.9081	5.1051
	19.9441	5.1041
	19.9791	5.1168
	20.0131	5.1041
	20.0481	5.1019
	20.0831	5.1021
	20.1182	5.1043
	20.1532	5.1217
	20.1882	5.1151
	20.2242	5.1132
	20.2602	5.1054
	20.2952	5.1098
	20.3302	5.1003
	20.3642	5.1107
	20.3992	5.1144
	20.4342	5.1031
	20.4692	5.1153
	20.5042	5.1058
	20.5402	5.1101
	20.5762	5.1129
	20.6122	5.1075
	20.6472	5.1057
	20.6812	5.1134
	20.7162	5.116
	20.7512	5.1187
	20.7862	5.121
	20.8222	5.1241
	20.8572	5.1136
	20.8932	5.1158
	20.9282	5.1241
	20.9632	5.1195
	20.9982	5.1172
	21.0342	5.1329
	21.0682	5.1226
	21.1032	5.1281
	21.1392	5.1199
	21.1752	5.1215
	21.2102	5.1273
	21.2452	5.1144
	21.2802	5.1193
	21.3152	5.1243
	21.3502	5.1181
	21.3852	5.118
	21.4212	5.118
	21.4562	5.124
	21.4922	5.1181
	21.5262	5.128
	21.5612	5.1198
	21.5962	5.1244
	21.6312	5.124
	21.6662	5.1228
	21.7012	5.122
	21.7372	5.1254
	21.7732	5.1214
	21.8082	5.1133
	21.8432	5.1231
	21.8783	5.1285
	21.9133	5.1385
	21.9493	5.129
	21.9833	5.1354
	22.0183	5.1211
	22.0543	5.129
	22.0903	5.1237
	22.1243	5.1264
	22.1593	5.1343
	22.1943	5.126
	22.2293	5.1238
	22.2653	5.1241
	22.3013	5.1259
	22.3373	5.1247
	22.3733	5.1297
	22.4083	5.1377
	22.4433	5.1268
	22.4793	5.1332
	22.5143	5.13
	22.5493	5.1344
	22.5843	5.141
	22.6193	5.1444
	22.6553	5.14
	22.6913	5.1376
	22.7273	5.1349
	22.7623	5.1267
	22.7973	5.1282
	22.8323	5.1292
	22.8683	5.1292
	22.9033	5.1337
	22.9383	5.1357
	22.9733	5.14
	23.0083	5.1368
	23.0433	5.144
	23.0783	5.146
	23.1143	5.1415
	23.1483	5.1384
	23.1843	5.1452
	23.2193	5.1494
	23.2553	5.1425
	23.2893	5.1523
	23.3243	5.1395
	23.3593	5.1435
	23.3953	5.1365
	23.4303	5.1441
	23.4643	5.1402
	23.5003	5.1473
	23.5363	5.1461
	23.5713	5.136
	23.6064	5.1321
	23.6414	5.1405
	23.6764	5.1309
	23.7124	5.1298
	23.7484	5.1356
	23.7844	5.1353
	23.8194	5.1344
	23.8554	5.145
	23.8904	5.1382
	23.9254	5.1349
	23.9604	5.1269
	23.9954	5.1432
	24.0324	5.1432
	24.0674	5.1403
	24.1034	5.1421
	24.1374	5.1548
	24.1724	5.1485
	24.2074	5.1431
	24.2434	5.1524
	24.2784	5.1365
	24.3124	5.1379
	24.3494	5.1412
	24.3844	5.1497
	24.4194	5.1557
	24.4554	5.1502
	24.4904	5.1503
	24.5254	5.1523
	24.5594	5.1492
	24.5944	5.1551
	24.6304	5.1538
	24.6644	5.157
	24.7004	5.1549
	24.7364	5.1664
	24.7724	5.1667
	24.8074	5.1631
	24.8414	5.161
	24.8764	5.1702
	24.9124	5.162
	24.9474	5.1625
	24.9814	5.1693
	25.0174	5.1672
	25.0524	5.1607
	25.0874	5.1633
	25.1224	5.1698
	25.1584	5.1762
	25.1944	5.1644
	25.2304	5.1702
	25.2654	5.1826
	25.3004	5.1806
	25.3344	5.1832
	25.3695	5.1811
	25.4045	5.1761
	25.4405	5.1829
	25.4755	5.1759
	25.5095	5.1772
	25.5445	5.1762
	25.5805	5.1706
	25.6155	5.1774
	25.6515	5.1731
	25.6855	5.1717
	25.7205	5.167
	25.7555	5.1803
	25.7915	5.1786
	25.8265	5.1741
	25.8625	5.1809
	25.8975	5.1825
	25.9315	5.1799
	25.9665	5.1786
	26.0025	5.1803
	26.0365	5.1731
	26.0715	5.177
	26.1065	5.1796
	26.1415	5.1766
	26.1775	5.1675
	26.2125	5.1695
	26.2475	5.1759
	26.2825	5.1721
	26.3175	5.1726
	26.3525	5.1776
	26.3875	5.1684
	26.4225	5.2078
	26.4595	5.2075
	26.4955	5.2108
	26.5305	5.2267
	26.5655	5.2187
	26.6005	5.2178
	26.6355	5.2077
	26.6715	5.2132
	26.7055	5.2147
	26.7405	5.2168
	26.7775	5.2159
	26.8125	5.2146
	26.8485	5.2191
	26.8825	5.2176
	26.9175	5.2234
	26.9525	5.2231
	26.9885	5.2168
	27.0225	5.2202
	27.0575	5.225
	27.0925	5.2294
	27.1286	5.2272
	27.1626	5.2288
	27.1976	5.2356
	27.2326	5.2303
	27.2676	5.2296
	27.3036	5.22
	27.3386	5.2218
	27.3736	5.223
	27.4096	5.222
	27.4446	5.2205
	27.4806	5.2276
	27.5156	5.229
	27.5516	5.2295
	27.5866	5.2263
	27.6216	5.2194
	27.6576	5.2254
	27.6936	5.2291
	27.7286	5.2295
	27.7646	5.2273
	27.7996	5.2218
	27.8356	5.223
	27.8716	5.231
	27.9076	5.2301
	27.9426	5.2303
	27.9776	5.2358
	28.0126	5.2292
	28.0476	5.233
	28.0826	5.2343
	28.1176	5.2307
	28.1526	5.2335
	28.1886	5.2327
	28.2246	5.2337
	28.2606	5.2378
	28.2956	5.2333
	28.3296	5.2279
	28.3646	5.2287
	28.4006	5.23
	28.4346	5.2277
	28.4706	5.2259
	28.5056	5.233
	28.5416	5.2311
	28.5756	5.2308
	28.6106	5.2293
	28.6456	5.2277
	28.6816	5.2293
	28.7156	5.2273
	28.7506	5.2246
	28.7866	5.2266
	28.8226	5.2282
	28.8577	5.229
	28.8927	5.2308
	28.9277	5.2245
	28.9627	5.2337
	28.9987	5.2333
	29.0327	5.2319
	29.0677	5.2234
	29.1017	5.2214
	29.1387	5.2338
	29.1737	5.2285
	29.2087	5.2241
	29.2437	5.2268
	29.2777	5.2276
	29.3127	5.2271
	29.3477	5.226
	29.3817	5.222
	29.4167	5.2328
	29.4517	5.2201
	29.4867	5.2284
	29.5227	5.2307
	29.5577	5.2225
	29.5927	5.219
	29.6277	5.2194
	29.6637	5.2251
	29.6987	5.217
	29.7327	5.2225
	29.7677	5.223
	29.8027	5.2224
	29.8387	5.22
	29.8747	5.222
	29.9097	5.2204
	29.9447	5.2254
	29.9807	5.2204
	30.0147	5.2289
	30.0507	5.2313
	30.0867	5.2218
	30.1217	5.2222
	30.1567	5.2183
	30.1917	5.2093
	30.2267	5.2211
	30.2617	5.2136
	30.2967	5.2187
	30.3317	5.2183
	30.3677	5.2193
	30.4027	5.224
	30.4367	5.2231
	30.4717	5.2236
	30.5067	5.2237
	30.5417	5.2304
	30.5767	5.2156
	30.6118	5.2242
	30.6468	5.2308
	30.6818	5.2193
	30.7178	5.2227
	30.7528	5.2182
	30.7878	5.2223
	30.8228	5.2421
	30.8588	5.2479
	30.8948	5.2512
	30.9298	5.2422
	30.9648	5.2432
	31.0008	5.2435
	31.0358	5.2508
	31.0718	5.248
	31.1058	5.2355
	31.1408	5.2389
	31.1758	5.2322
	31.2108	5.2353
	31.2458	5.2364
	31.2818	5.2365
	31.3158	5.2312
	31.3518	5.2294
	31.3858	5.2385
	31.4208	5.2398
	31.4548	5.2334
	31.4898	5.2296
	31.5248	5.234
	31.5598	5.2363
	31.5948	5.2341
	31.6308	5.2419
	31.6668	5.2397
	31.7018	5.2365
	31.7368	5.2398
	31.7718	5.2391
	31.8078	5.2399
	31.8428	5.2441
	31.8788	5.2453
	31.9138	5.2422
	31.9498	5.2336
	31.9848	5.2481
	32.0208	5.235
	32.0548	5.2412
	32.0898	5.2399
	32.1248	5.2434
	32.1598	5.2421
	32.1958	5.2442
	32.2308	5.2455
	32.2668	5.2409
	32.3008	5.2466
	32.3358	5.2417
	32.3709	5.2509
	32.4059	5.2458
	32.4409	5.2351
	32.4759	5.2407
	32.5109	5.2517
	32.5469	5.2407
	32.5819	5.2417
	32.6169	5.2421
	32.6519	5.2395
	32.6869	5.2468
	32.7219	5.2522
	32.7569	5.2505
	32.7919	5.2519
	32.8279	5.2534
	32.8619	5.2526
	32.8979	5.2526
	32.9339	5.2547
	32.9699	5.2609
	33.0049	5.2503
	33.0409	5.2616
	33.0769	5.2659
	33.1129	5.2629
	33.1479	5.2673
	33.1839	5.263
	33.2189	5.2664
	33.2539	5.2629
	33.2889	5.2663
	33.3239	5.2624
	33.3589	5.2669
	33.3949	5.2691
	33.4299	5.2718
	33.4649	5.2722
	33.4999	5.2717
	33.5349	5.2671
	33.5699	5.2765
	33.6049	5.2719
	33.6399	5.2753
	33.6749	5.2723
	33.7109	5.2646
	33.7459	5.2678
	33.7809	5.2615
	33.8159	5.2711
	33.8509	5.2741
	33.8859	5.2897
	33.9219	5.2858
	33.9579	5.2811
	33.9939	5.2825
	34.0289	5.2852
	34.0639	5.2843
	34.099	5.2849
	34.134	5.2925
	34.169	5.2898
	34.204	5.2827
	34.24	5.2852
	34.276	5.2886
	34.311	5.2818
	34.346	5.2773
	34.381	5.2809
	34.416	5.2768
	34.451	5.2853
	34.487	5.2943
	34.523	5.2861
	34.559	5.2834
	34.594	5.2834
	34.629	5.2872
	34.664	5.2871
	34.699	5.2903
	34.734	5.2814
	34.769	5.2814
	34.804	5.2819
	34.839	5.2828
	34.874	5.2858
	34.91	5.2928
	34.945	5.2884
	34.98	5.2869
	35.016	5.294
	35.05	5.285
	35.085	5.2891
	35.121	5.2918
	35.156	5.2855
	35.192	5.2869
	35.228	5.2874
	35.262	5.2915
	35.297	5.2968
	35.332	5.296
	35.367	5.2934
	35.402	5.303
	35.438	5.2937
	35.474	5.3032
	35.509	5.2872
	35.544	5.2868
	35.579	5.2894
	35.614	5.2917
	35.649	5.2884
	35.684	5.2914
	35.719	5.2841
	35.754	5.2901
	35.79	5.2851
	35.827	5.2847
	35.8621	5.2936
	35.8961	5.2917
	35.9321	5.2969
	35.9681	5.2893
	36.0031	5.2939
	36.0391	5.2958
	36.0751	5.2932
	36.1101	5.2874
	36.1441	5.2855
	36.1791	5.2936
	36.2141	5.2929
	36.2491	5.2914
	36.2851	5.2813
	36.3201	5.2907
	36.3561	5.2842
	36.3911	5.2934
	36.4261	5.3019
	36.4611	5.2915
	36.4961	5.2943
	36.5321	5.2951
	36.5661	5.2911
	36.6021	5.2913
	36.6381	5.2874
	36.6731	5.2913
	36.7091	5.2863
	36.7441	5.2948
	36.7781	5.2922
	36.8131	5.2962
	36.8491	5.2827
	36.8841	5.2798
	36.9201	5.2867
	36.9551	5.2853
	36.9901	5.2949
	37.0251	5.2897
	37.0601	5.2913
	37.0961	5.2874
	37.1311	5.2833
	37.1661	5.2891
	37.2031	5.2929
	37.2381	5.2931
	37.2731	5.2911
	37.3081	5.2866
	37.3431	5.2984
	37.3781	5.288
	37.4131	5.2926
	37.4481	5.2845
	37.4831	5.2851
	37.5191	5.2885
	37.5531	5.2805
	37.5882	5.2866
	37.6242	5.288
	37.6582	5.2863
	37.6932	5.2862
	37.7282	5.2891
	37.7632	5.2766
	37.7992	5.2892
	37.8332	5.2938
	37.8682	5.2917
	37.9032	5.3053
	37.9392	5.299
	37.9732	5.3062
	38.0092	5.2999
	38.0442	5.2976
	38.0802	5.2979
	38.1162	5.3041
	38.1522	5.3042
	38.1882	5.2961
	38.2232	5.3
	38.2592	5.3016
	38.2942	5.299
	38.3302	5.2957
	38.3662	5.2963
	38.4012	5.2947
	38.4372	5.305
	38.4712	5.2928
	38.5072	5.2943
	38.5422	5.2994
	38.5772	5.2913
	38.6142	5.3004
	38.6492	5.3017
	38.6852	5.2997
	38.7192	5.3043
	38.7542	5.2994
	38.7902	5.2957
	38.8242	5.2943
	38.8592	5.2937
	38.8952	5.3052
	38.9302	5.2906
	38.9662	5.3
	39.0012	5.305
	39.0362	5.3006
	39.0722	5.2994
	39.1072	5.2974
	39.1412	5.3006
	39.1762	5.2984
	39.2122	5.2997
	39.2482	5.3026
	39.2832	5.3067
	39.3192	5.3045
	39.3533	5.3051
	39.3883	5.3045
	39.4243	5.31
	39.4593	5.2956
	39.4943	5.3024
	39.5303	5.2952
	39.5653	5.2874
	39.6003	5.2932
	39.6353	5.2979
	39.6703	5.3019
	39.7053	5.3086
	39.7403	5.3139
	39.7763	5.3002
	39.8113	5.3
	39.8473	5.2988
	39.8823	5.2988
	39.9183	5.3037
	39.9523	5.3069
	39.9883	5.305
	40.0233	5.3092
	40.0583	5.3066
	40.0943	5.3107
	40.1293	5.304
	40.1643	5.305
	40.1983	5.3041
	40.2333	5.3078
	40.2683	5.3038
	40.3033	5.3107
	40.3383	5.2999
	40.3733	5.3055
	40.4093	5.3053
	40.4453	5.3064
	40.4813	5.3088
	40.5163	5.3085
	40.5513	5.301
	40.5853	5.3056
	40.6203	5.3034
	40.6553	5.3054
	40.6913	5.3089
	40.7263	5.3097
	40.7623	5.3149
	40.7973	5.3118
	40.8323	5.3078
	40.8673	5.3115
	40.9033	5.3144
	40.9373	5.316
	40.9723	5.3076
	41.0083	5.3121
	41.0443	5.3144
	41.0793	5.3096
	41.1154	5.3089
	41.1494	5.3088
	41.1844	5.3125
	41.2204	5.3108
	41.2544	5.3014
	41.2904	5.3057
	41.3244	5.3063
	41.3604	5.3056
	41.3954	5.312
	41.4304	5.3087
	41.4654	5.3135
	41.5014	5.3136
	41.5354	5.3154
	41.5714	5.3071
	41.6064	5.3131
	41.6424	5.3146
	41.6774	5.3129
	41.7134	5.3155
	41.7474	5.3074
	41.7824	5.3146
	41.8174	5.3201
	41.8524	5.3124
	41.8884	5.3077
	41.9234	5.3113
	41.9594	5.3167
	41.9934	5.3087
	42.0294	5.3207
	42.0654	5.3069
	42.0994	5.3105
	42.1344	5.305
	42.1704	5.3086
	42.2054	5.3103
	42.2414	5.311
	42.2764	5.3105
	42.3124	5.3075
	42.3464	5.3075
	42.3824	5.3072
	42.4164	5.3
	42.4514	5.3104
	42.4874	5.3117
	42.5234	5.3086
	42.5574	5.316
	42.5924	5.3155
	42.6274	5.3129
	42.6624	5.3179
	42.6974	5.3088
	42.7324	5.3188
	42.7674	5.3198
	42.8024	5.3158
	42.8375	5.3152
	42.8735	5.3171
	42.9085	5.3205
	42.9435	5.309
	42.9785	5.3141
	43.0135	5.316
	43.0495	5.3167
	43.0845	5.3177
	43.1195	5.3203
	43.1555	5.3068
	43.1905	5.3064
	43.2255	5.3118
	43.2605	5.3101
	43.2955	5.3045
	43.3295	5.3095
	43.3645	5.3168
	43.3995	5.3077
	43.4355	5.3126
	43.4705	5.3199
	43.5055	5.3158
	43.5415	5.3104
	43.5755	5.3202
	43.6105	5.3148
	43.6465	5.3261
	43.6815	5.3172
	43.7165	5.3206
	43.7525	5.3185
	43.7875	5.3224
	43.8225	5.3192
	43.8575	5.3251
	43.8935	5.3176
	43.9295	5.3215
	43.9655	5.3185
	44.0005	5.3209
	44.0365	5.3293
	44.0725	5.3218
	44.1085	5.3233
	44.1435	5.3254
	44.1775	5.3165
	44.2135	5.3127
	44.2495	5.3223
	44.2855	5.3164
	44.3205	5.3239
	44.3555	5.3258
	44.3905	5.3177
	44.4265	5.3203
	44.4605	5.3147
	44.4955	5.325
	44.5325	5.3161
	44.5685	5.3135
	44.6046	5.3179
	44.6396	5.3186
	44.6736	5.3213
	44.7086	5.3253
	44.7436	5.3225
	44.7786	5.3253
	44.8146	5.3191
	44.8506	5.3331
	44.8856	5.335
	44.9216	5.3331
	44.9566	5.3222
	44.9906	5.3241
	45.0256	5.3272
	45.0616	5.3179
	45.0966	5.3177
	45.1326	5.3117
	45.1686	5.3202
	45.2046	5.3201
	45.2396	5.3177
	45.2746	5.3123
	45.3106	5.323
	45.3456	5.3176
	45.3816	5.3138
	45.4166	5.3244
	45.4516	5.3203
	45.4866	5.3327
	45.5206	5.3314
	45.5556	5.3234
	45.5906	5.3286
	45.6256	5.3203
	45.6606	5.3183
	45.6966	5.3216
	45.7306	5.3222
	45.7666	5.3356
	45.8006	5.3232
	45.8356	5.3242
	45.8706	5.3237
	45.9056	5.3219
	45.9416	5.3257
	45.9756	5.318
	46.0116	5.3312
	46.0466	5.3269
	46.0826	5.3158
	46.1186	5.323
	46.1546	5.332
	46.1896	5.3165
	46.2246	5.3313
	46.2606	5.3292
	46.2956	5.3248
	46.3317	5.3322
	46.3667	5.3326
	46.4017	5.3335
	46.4367	5.335
	46.4717	5.3322
	46.5077	5.3369
	46.5427	5.3253
	46.5787	5.3247
	46.6147	5.3186
	46.6507	5.3333
	46.6847	5.327
	46.7197	5.3318
	46.7557	5.3231
	46.7897	5.3255
	46.8247	5.3401
	46.8607	5.3476
	46.8957	5.34
	46.9307	5.3353
	46.9657	5.3444
	47.0007	5.3483
	47.0367	5.3561
	47.0717	5.3501
	47.1067	5.3545
	47.1427	5.3492
	47.1797	5.3516
	47.2137	5.3525
	47.2487	5.3499
	47.2837	5.3538
	47.3197	5.355
	47.3537	5.3545
	47.3887	5.351
	47.4247	5.3505
	47.4597	5.3534
	47.4947	5.3538
	47.5297	5.3482
	47.5657	5.3468
	47.5997	5.355
	47.6347	5.3513
	47.6697	5.3438
	47.7057	5.3432
	47.7417	5.3401
	47.7777	5.3479
	47.8127	5.3459
	47.8477	5.3419
	47.8827	5.3409
	47.9177	5.3533
	47.9537	5.3483
	47.9877	5.35
	48.0237	5.3758
	48.0597	5.3803
	48.0948	5.3809
	48.1298	5.3753
	48.1648	5.3783
	48.2008	5.3697
	48.2368	5.3726
	48.2728	5.3755
	48.3088	5.382
	48.3438	5.3778
	48.3798	5.3743
	48.4138	5.379
	48.4488	5.3766
	48.4838	5.3736
	48.5198	5.3817
	48.5548	5.3861
	48.5898	5.3828
	48.6258	5.3815
	48.6608	5.3807
	48.6958	5.3771
	48.7308	5.378
	48.7658	5.3763
	48.8018	5.3762
	48.8368	5.3729
	48.8728	5.3806
	48.9088	5.376
	48.9448	5.378
	48.9788	5.3844
	49.0148	5.3869
	49.0498	5.3891
	49.0848	5.3976
	49.1198	5.3893
	49.1578	5.3878
	49.1928	5.3942
	49.2288	5.3928
	49.2648	5.394
	49.2998	5.3973
	49.3348	5.3916
	49.3708	5.3932
	49.4068	5.3837
	49.4418	5.3764
	49.4768	5.3804
	49.5118	5.3834
	49.5468	5.3807
	49.5818	5.3796
	49.6178	5.3796
	49.6528	5.3745
	49.6888	5.3853
	49.7238	5.3825
	49.7578	5.3758
	49.7928	5.3817
	49.8279	5.3758
	49.8629	5.3778
	49.8989	5.3819
	49.9329	5.3778
	49.9689	5.3813
	50.0049	5.3826
	50.0399	5.38
	50.0749	5.3742
	50.1099	5.374
	50.1459	5.3809
	50.1809	5.3836
	50.2159	5.3865
	50.2509	5.3868
	50.2859	5.3879
	50.3219	5.3914
	50.3569	5.38
	50.3919	5.3811
	50.4269	5.3851
	50.4629	5.3837
	50.4969	5.3851
	50.5319	5.3902
	50.5679	5.3864
	50.6039	5.3829
	50.6389	5.3875
	50.6739	5.389
	50.7089	5.391
	50.7449	5.3899
	50.7789	5.3881
	50.8149	5.3791
	50.8499	5.3765
	50.8849	5.3871
	50.9209	5.3827
	50.9549	5.3869
	50.9899	5.3878
	51.0249	5.3923
	51.0609	5.3942
	51.0949	5.3865
	51.1299	5.3994
	51.1659	5.3987
	51.2019	5.4036
	51.2379	5.4033
	51.2729	5.4015
	51.3069	5.4009
	51.3419	5.3963
	51.3769	5.4037
	51.4119	5.4018
	51.4479	5.3996
	51.4829	5.3981
	51.5189	5.4039
	51.5529	5.407
	51.588	5.4005
	51.623	5.396
	51.658	5.3984
	51.693	5.4071
	51.728	5.4067
	51.764	5.3978
	51.799	5.4098
	51.834	5.4059
	51.869	5.409
	51.904	5.408
	51.939	5.409
	51.974	5.4113
	52.009	5.4064
	52.044	5.4116
	52.079	5.4088
	52.116	5.411
	52.151	5.4134
	52.185	5.4045
	52.221	5.4043
	52.256	5.411
	52.291	5.4244
	52.326	5.4209
	52.36	5.4275
	52.395	5.4288
	52.431	5.4288
	52.467	5.4146
	52.503	5.4204
	52.537	5.4177
	52.572	5.4089
	52.608	5.4145
	52.642	5.4115
	52.678	5.4165
	52.713	5.4141
	52.749	5.4189
	52.785	5.409
	52.82	5.4114
	52.854	5.4124
	52.89	5.4108
	52.925	5.4141
	52.961	5.4075
	52.996	5.411
	53.032	5.4081
	53.067	5.4059
	53.102	5.406
	53.137	5.4022
	53.172	5.4112
	53.207	5.4151
	53.243	5.4133
	53.279	5.4112
	53.314	5.4106
	53.3491	5.3995
	53.3851	5.4031
	53.4201	5.4042
	53.4541	5.4084
	53.4891	5.4084
	53.5241	5.4113
	53.5601	5.4076
	53.5951	5.4055
	53.6301	5.4081
	53.6641	5.4181
	53.7001	5.4172
	53.7341	5.4159
	53.7681	5.4135
	53.8031	5.4051
	53.8381	5.4127
	53.8731	5.4107
	53.9091	5.4152
	53.9441	5.4183
	53.9791	5.411
	54.0141	5.4155
	54.0501	5.4136
	54.0861	5.4138
	54.1201	5.4195
	54.1551	5.4108
	54.1901	5.405
	54.2261	5.4203
	54.2611	5.4059
	54.2971	5.4051
	54.3331	5.4041
	54.3681	5.4036
	54.4041	5.4102
	54.4401	5.4119
	54.4761	5.4175
	54.5131	5.4135
	54.5491	5.411
	54.5841	5.4099
	54.6191	5.4119
	54.6541	5.412
	54.6901	5.4187
	54.7261	5.4155
	54.7621	5.414
	54.7981	5.4127
	54.8331	5.4105
	54.8681	5.4057
	54.9041	5.4058
	54.9381	5.3988
	54.9731	5.4015
	55.0091	5.4062
	55.0441	5.4003
	55.0792	5.3988
	55.1142	5.4039
	55.1492	5.404
	55.1852	5.3947
	55.2202	5.3982
	55.2552	5.4042
	55.2912	5.3994
	55.3272	5.3954
	55.3622	5.4067
	55.3982	5.4127
	55.4322	5.403
	55.4682	5.4028
	55.5022	5.4032
	55.5382	5.4043
	55.5732	5.3933
	55.6092	5.3931
	55.6442	5.4068
	55.6802	5.4002
	55.7142	5.3961
	55.7502	5.4015
	55.7842	5.4031
	55.8202	5.4007
	55.8552	5.4046
	55.8912	5.4029
	55.9272	5.4002
	55.9622	5.4043
	55.9982	5.4127
	56.0332	5.409
	56.0692	5.4033
	56.1042	5.4079
	56.1412	5.4149
	56.1762	5.4112
	56.2122	5.4087
	56.2462	5.4025
	56.2812	5.4051
	56.3172	5.4044
	56.3532	5.3999
	56.3892	5.4085
	56.4242	5.409
	56.4592	5.4044
	56.4952	5.4103
	56.5292	5.4072
	56.5652	5.4063
	56.5992	5.4038
	56.6342	5.4152
	56.6702	5.4028
	56.7052	5.4064
	56.7402	5.4114
	56.7752	5.4173
	56.8112	5.4148
	56.8453	5.414
	56.8813	5.4081
	56.9153	5.4147
	56.9503	5.4194
	56.9853	5.4047
	57.0213	5.412
	57.0573	5.4168
	57.0913	5.415
	57.1263	5.4192
	57.1613	5.4049
	57.1963	5.4114
	57.2323	5.4201
	57.2673	5.4142
	57.3033	5.4101
	57.3393	5.4035
	57.3743	5.4036
	57.4103	5.4139
	57.4443	5.4157
	57.4793	5.4083
	57.5143	5.4104
	57.5503	5.4072
	57.5853	5.4153
	57.6203	5.4151
	57.6553	5.416
	57.6903	5.4177
	57.7263	5.4167
	57.7603	5.4158
	57.7963	5.414
	57.8313	5.4101
	57.8663	5.4186
	57.9013	5.4185
	57.9373	5.4234
	57.9723	5.4159
	58.0073	5.4221
	58.0423	5.4148
	58.0783	5.4159
	58.1133	5.4156
	58.1483	5.4095
	58.1843	5.4096
	58.2193	5.4148
	58.2543	5.4152
	58.2883	5.4151
	58.3233	5.4197
	58.3593	5.421
	58.3953	5.4213
	58.4303	5.423
	58.4663	5.42
	58.5023	5.4171
	58.5373	5.4203
	58.5734	5.4191
	58.6084	5.4222
	58.6434	5.4212
	58.6784	5.4225
	58.7144	5.419
	58.7504	5.4214
	58.7854	5.4249
	58.8204	5.4209
	58.8554	5.4193
	58.8904	5.425
	58.9254	5.4198
	58.9604	5.4228
	58.9964	5.4214
	59.0314	5.4209
	59.0664	5.4071
	59.1014	5.4161
	59.1364	5.4213
	59.1714	5.4308
	59.2064	5.4234
	59.2424	5.4174
	59.2764	5.4134
	59.3124	5.41
	59.3484	5.4156
	59.3844	5.4187
	59.4194	5.4076
	59.4554	5.4131
	59.4914	5.4239
	59.5264	5.4123
	59.5614	5.4263
	59.5974	5.4232
	59.6334	5.4175
	59.6684	5.4212
	59.7044	5.4202
	59.7404	5.4202
	59.7764	5.4275
	59.8124	5.4267
	59.8484	5.4193
	59.8834	5.4157
	59.9194	5.4224
	59.9534	5.4223
	59.9894	5.4208
	60.0244	5.4142
	60.0884	5.4181
	60.1234	5.4168
	60.1584	5.4094
	60.1924	5.4231
	60.2294	5.4136
	60.2644	5.4161
	60.2994	5.4158
	60.3355	5.4149
	60.3705	5.4155
	60.4055	5.4087
	60.4395	5.413
	60.4745	5.4138
	60.5105	5.4128
	60.5465	5.4165
	60.5805	5.4129
	60.6155	5.4196
	60.6505	5.4186
	60.6855	5.416
	60.7205	5.413
	60.7555	5.422
	60.7905	5.4158
	60.8265	5.4251
	60.8625	5.4223
	60.8975	5.4283
	60.9325	5.4186
	60.9675	5.4207
	61.0025	5.4186
	61.0375	5.4212
	61.0725	5.411
	61.1085	5.4142
	61.1445	5.4191
	61.1795	5.4239
	61.2145	5.4106
	61.2505	5.4102
	61.2865	5.4117
	61.3205	5.4158
	61.3555	5.4168
	61.3915	5.4147
	61.4275	5.4274
	61.4635	5.4149
	61.4985	5.4255
	61.5345	5.4286
	61.5695	5.421
	61.6035	5.4209
	61.6385	5.4211
	61.6745	5.4301
	61.7085	5.4217
	61.7435	5.4289
	61.7785	5.4196
	61.8125	5.4302
	61.8475	5.426
	61.8825	5.4286
	61.9175	5.429
	61.9525	5.4312
	61.9875	5.4222
	62.0225	5.4228
	62.0575	5.4197
	62.0936	5.4225
	62.1286	5.4309
	62.1636	5.418
	62.1986	5.4228
	62.2336	5.4187
	62.2686	5.4227
	62.3036	5.4248
	62.3396	5.4227
	62.3756	5.423
	62.4106	5.4225
	62.4456	5.4234
	62.4806	5.4263
	62.5146	5.4272
	62.5496	5.4161
	62.5846	5.4245
	62.6196	5.4209
	62.6556	5.42
	62.6906	5.4289
	62.7256	5.426
	62.7606	5.4247
	62.7956	5.4218
	62.8306	5.4248
	62.8656	5.4293
	62.9006	5.4264
	62.9366	5.4279
	62.9716	5.4261
	63.0076	5.4244
	63.0436	5.4214
	63.0786	5.4215
	63.1126	5.424
	63.1476	5.4188
	63.1826	5.4269
	63.2176	5.4277
	63.2536	5.4274
	63.2896	5.418
	63.3246	5.4201
	63.3606	5.413
	63.3946	5.4201
	63.4296	5.4175
	63.4656	5.4192
	63.5016	5.4176
	63.5376	5.4208
	63.5726	5.4151
	63.6076	5.4212
	63.6436	5.4167
	63.6786	5.4227
	63.7136	5.4098
	63.7486	5.42
	63.7826	5.4208
	63.8177	5.4118
	63.8527	5.414
	63.8887	5.4123
	63.9227	5.4102
	63.9577	5.4161
	63.9927	5.4124
	64.0277	5.4182
	64.0637	5.4163
	64.0987	5.4131
	64.1347	5.4184
	64.1707	5.4108
	64.2057	5.41
	64.2407	5.4155
	64.2757	5.4167
	64.3117	5.4114
	64.3457	5.4261
	64.3807	5.416
	64.4157	5.4219
	64.4517	5.4201
	64.4877	5.4196
	64.5227	5.4168
	64.5587	5.4177
	64.5927	5.4226
	64.6287	5.4177
	64.6637	5.4212
	64.6977	5.4295
	64.7337	5.4196
	64.7697	5.417
	64.8047	5.421
	64.8397	5.4161
	64.8747	5.4262
	64.9097	5.4184
	64.9447	5.4192
	64.9797	5.4192
	65.0157	5.4177
	65.0507	5.4238
	65.0867	5.4223
	65.1227	5.4207
	65.1567	5.4147
	65.1917	5.4194
	65.2277	5.4156
	65.2637	5.4141
	65.2987	5.41
	65.3347	5.4102
	65.3697	5.4146
	65.4047	5.4175
	65.4397	5.4194
	65.4747	5.4192
	65.5107	5.4161
	65.5467	5.4134
	65.5808	5.4193
	65.6158	5.4198
	65.6518	5.4239
	65.6868	5.4302
	65.7218	5.4224
	65.7578	5.4191
	65.7918	5.4239
	65.8278	5.421
	65.8628	5.425
	65.8978	5.4218
	65.9338	5.4228
	65.9698	5.4223
	66.0038	5.4187
	66.0388	5.4314
	66.0748	5.4239
	66.1088	5.4275
	66.1448	5.426
	66.1798	5.4209
	66.2158	5.4329
	66.2508	5.433
	66.2848	5.4328
	66.3198	5.4304
	66.3548	5.4274
	66.3898	5.4276
	66.4248	5.4265
	66.4598	5.4237
	66.4958	5.4252
	66.5328	5.4294
	66.5688	5.4323
	66.6038	5.4349
	66.6388	5.4254
	66.6748	5.4228
	66.7108	5.4268
	66.7468	5.4287
	66.7818	5.4196
	66.8178	5.4217
	66.8538	5.4254
	66.8888	5.4313
	66.9238	5.4205
	66.9598	5.4218
	66.9948	5.4274
	67.0308	5.4348
	67.0658	5.4345
	67.1018	5.4256
	67.1368	5.4242
	67.1718	5.4295
	67.2068	5.4203
	67.2418	5.411
	67.2778	5.4179
	67.3119	5.4235
	67.3479	5.4285
	67.3829	5.4211
	67.4179	5.4245
	67.4539	5.4234
	67.4889	5.427
	67.5249	5.4252
	67.5609	5.4338
	67.5959	5.4368
	67.6309	5.4393
	67.6669	5.4316
	67.7009	5.4319
	67.7369	5.4335
	67.7709	5.428
	67.8069	5.4282
	67.8429	5.4282
	67.8769	5.433
	67.9129	5.4335
	67.9479	5.4415
	67.9839	5.4325
	68.0189	5.4332
	68.0539	5.4425
	68.0899	5.4347
	68.1259	5.4346
	68.1619	5.436
	68.1969	5.4365
	68.2309	5.4277
	68.2659	5.4379
	68.3009	5.4398
	68.3359	5.4358
	68.3719	5.4341
	68.4069	5.4363
	68.4419	5.4312
	68.4779	5.4346
	68.5129	5.4219
	68.5479	5.4252
	68.5839	5.4318
	68.6179	5.4305
	68.6529	5.4354
	68.6889	5.4301
	68.7239	5.4312
	68.7589	5.4332
	68.7949	5.4366
	68.8289	5.4296
	68.8639	5.4296
	68.8989	5.4299
	68.9339	5.4389
	68.9689	5.4348
	69.0039	5.4287
	69.0399	5.4386
	69.076	5.4312
	69.112	5.4257
	69.147	5.4268
	69.182	5.4328
	69.218	5.4287
	69.252	5.4284
	69.287	5.4299
	69.323	5.4282
	69.358	5.4291
	69.393	5.4251
	69.428	5.4321
	69.464	5.43
	69.5	5.4256
	69.536	5.4243
	69.571	5.4291
	69.607	5.4267
	69.643	5.43
	69.677	5.4309
	69.712	5.4287
	69.747	5.4227
	69.782	5.4211
	69.818	5.4294
	69.854	5.4314
	69.889	5.4267
	69.925	5.4263
	69.96	5.436
	69.995	5.4322
	70.03	5.4302
	70.065	5.4229
	70.101	5.4284
	70.136	5.4325
	70.172	5.4343
	70.207	5.4404
	70.242	5.4388
	70.277	5.4342
	70.313	5.4358
	70.348	5.4348
	70.384	5.4423
	70.42	5.4401
	70.456	5.4379
	70.491	5.4371
[truncated: 1,970 more rows]
