# Supplementary material for: A new insight into RecA filament regulation by RecX from the analysis of conformation-specific interactions
Source: eLife. 2022 Jun 22;11:e78409. doi: 10.7554/eLife.78409 (PMC9252578; doi:10.7554/eLife.78409)
Supplement: Figure 1—source data 1. [file elife-78409-fig1-data1.xlsx]

## Sheet: Fig 1C
		1 µM RecX				500 nM RecX				200 nM RecX
	Time, s	Length, µm	Force, pN		Time, s	Length, µm	Force, pN		Time, s	Length, µm	Force, pN
	0	5.2428	3.1305		0	5.2692	3.2582		0	5.2453	2.9789
	0.035	5.2391	3.0139		0.041	5.2612	2.9414		0.035	5.2532	2.7202
	0.07	5.2426	2.7829		0.078	5.2568	3.3816		0.071	5.2351	3.1301
	0.104	5.2424	3.0791		0.12	5.266	3.0796		0.106	5.238	2.983
	0.138	5.2326	3.3748		0.157	5.2717	2.8449		0.141	5.2375	3.2371
	0.172	5.2333	3.0592		0.196	5.2624	3.056		0.1761	5.2448	2.8025
	0.207	5.2341	3.24		0.237	5.2642	2.8328		0.2111	5.2356	3.0203
	0.242	5.234	3.2722		0.274	5.2705	2.4571		0.2461	5.2326	2.7742
	0.277	5.2368	3.0433		0.315	5.2802	2.7041		0.2801	5.2414	2.767
	0.312	5.2414	3.1364		0.356	5.2849	2.5981		0.3151	5.2516	2.6378
	0.348	5.2349	3.0993		0.392	5.2779	2.8546		0.3501	5.2432	2.6034
	0.383	5.2463	2.7896		0.432	5.2835	2.7658		0.3871	5.2384	2.8101
	0.417	5.245	3.0621		0.47	5.2781	2.8301		0.4231	5.2563	2.3931
	0.451	5.247	2.7934		0.509	5.2643	3.2132		0.4581	5.2457	2.7359
	0.485	5.2477	2.9403		0.55	5.2743	2.8795		0.4931	5.2485	2.5371
	0.52	5.2548	2.888		0.59	5.2816	2.9223		0.5281	5.252	2.5552
	0.554	5.2485	2.8744		0.625	5.27	3.0125		0.5631	5.2411	2.7561
	0.588	5.2429	3.3288		0.661	5.2585	3.4198		0.5971	5.2404	2.9513
	0.622	5.2479	2.8475		0.701	5.2661	3.1437		0.6321	5.2508	2.7417
	0.657	5.2451	2.9651		0.741	5.263	3.054		0.6671	5.2525	2.873
	0.691	5.2538	2.7105		0.783	5.2674	2.8221		0.7031	5.2504	3.0232
	0.725	5.2419	3.0207		0.819	5.2595	3.3916		0.7391	5.246	2.9404
	0.759	5.2486	2.9712		0.856	5.2708	3.1551		0.7731	5.2517	3.0563
	0.794	5.2511	2.8718		0.898	5.2602	3.1348		0.8081	5.2372	3.4925
	0.83	5.2465	3.21		0.94	5.2715	2.6825		0.8431	5.2432	3.3077
	0.864	5.2475	3.0472		0.989	5.27	3.2081		0.8781	5.2464	3.4653
	0.8991	5.2463	3.359		1.03	5.2725	2.904		0.9131	5.2376	3.4308
	0.9341	5.2418	3.1659		1.066	5.2657	3.1712		0.9481	5.2377	3.4925
	0.9681	5.2521	3.0641		1.107	5.2635	3.2167		0.9831	5.2399	3.3925
	1.0031	5.241	3.101		1.149	5.2565	2.899		1.0191	5.2356	3.2635
	1.0371	5.2484	2.7684		1.19	5.2641	2.9671		1.0541	5.2535	3.1076
	1.0711	5.2361	2.9995		1.2311	5.2836	2.5673		1.0891	5.2474	3.1635
	1.1061	5.2368	3.0463		1.2681	5.2767	3.0444		1.1241	5.2444	3.209
	1.1411	5.2336	3.089		1.3041	5.2787	2.8433		1.1591	5.2392	3.4879
	1.1761	5.242	2.794		1.3461	5.2745	3.0353		1.1941	5.2443	2.7914
	1.2111	5.2375	2.7479		1.3871	5.2679	2.7189		1.2281	5.244	2.8906
	1.2461	5.23	3.295		1.4281	5.2707	2.9605		1.2631	5.2486	2.625
	1.2811	5.238	2.9288		1.4651	5.261	3.0922		1.2981	5.2471	2.9429
	1.3161	5.2468	2.6086		1.5021	5.2747	2.8261		1.3331	5.2413	2.9219
	1.3511	5.2426	2.8272		1.5431	5.2704	2.9239		1.3681	5.2469	2.8327
	1.3851	5.2404	3.0067		1.5841	5.2826	2.6582		1.4041	5.2509	2.5232
	1.4201	5.242	3.2512		1.6241	5.2812	2.6785		1.4381	5.2422	2.8768
	1.4541	5.2392	3.1578		1.6601	5.2727	3.1389		1.4731	5.2514	2.7245
	1.4891	5.2515	3.0145		1.7011	5.2735	2.8607		1.5081	5.2414	2.8645
	1.5231	5.2509	2.6526		1.7371	5.2769	2.6499		1.5431	5.2431	2.8657
	1.5581	5.2606	2.9036		1.7771	5.2821	2.8065		1.5781	5.24	3.0776
	1.5931	5.258	2.9751		1.8181	5.2871	3.0129		1.6131	5.2326	3.0975
	1.6281	5.2405	3.162		1.8551	5.2757	3.092		1.6511	5.2445	2.8292
	1.6631	5.2448	3.0212		1.8941	5.2771	2.8909		1.6871	5.2315	2.9408
	1.6971	5.2455	3.0543		1.9351	5.2801	3.0624		1.7221	5.2457	2.8918
	1.7311	5.2502	2.9234		1.9711	5.2855	2.5604		1.7581	5.2415	2.7954
	1.7661	5.2481	2.9507		2.0101	5.2875	2.7168		1.7921	5.2497	2.8559
	1.8001	5.246	2.7253		2.0501	5.2821	3.0007		1.8271	5.2638	2.7325
	1.8341	5.2496	2.8648		2.0881	5.2776	2.8387		1.8631	5.2585	2.8834
	1.8681	5.2506	2.8368		2.1291	5.2824	2.7833		1.8981	5.2522	3.0849
	1.9031	5.2451	3.0148		2.1651	5.2723	3.2624		1.9332	5.2553	2.7995
	1.9371	5.2571	2.8852		2.2051	5.2844	3.1656		1.9692	5.2506	3.0789
	1.9711	5.2443	3.1711		2.2461	5.2657	3.2744		2.0042	5.2512	2.9492
	2.0061	5.2391	3.4092		2.2831	5.2842	3.1713		2.0392	5.2506	3.0564
	2.0401	5.2411	3.1649		2.3231	5.2729	3.4173		2.0742	5.2462	3.2537
	2.0751	5.237	3.1344		2.3641	5.2642	3.3762		2.1102	5.2469	2.8519
	2.1111	5.2419	3.1684		2.4001	5.2623	3.3356		2.1442	5.2407	3.3694
	2.1451	5.244	2.9621		2.4401	5.26	3.4899		2.1792	5.24	3.1562
	2.1801	5.2427	3.0651		2.4761	5.2611	3.0848		2.2162	5.2417	3.3
	2.2151	5.2392	3.0411		2.5151	5.2744	3.4382		2.2522	5.2456	3.0802
	2.2501	5.2456	2.8029		2.5551	5.2656	2.9326		2.2872	5.2456	3.0338
	2.2851	5.2464	2.9109		2.5961	5.264	3.1875		2.3222	5.2387	3.3674
	2.3191	5.2451	2.5532		2.6331	5.2679	2.9568		2.3572	5.242	3.008
	2.3531	5.2475	2.6756		2.6681	5.2558	3.3551		2.3922	5.2351	3.0352
	2.3871	5.2504	2.8946		2.7081	5.2586	3.0178		2.4272	5.2258	3.4535
	2.4221	5.246	3.0028		2.7491	5.2639	3.1843		2.4622	5.2313	3.0769
	2.4561	5.2499	2.9827		2.7891	5.2669	2.7233		2.4992	5.2355	2.8815
	2.4901	5.2565	2.9177		2.8251	5.2636	3.1005		2.5342	5.2389	2.9014
	2.5241	5.251	3.2347		2.8621	5.2702	2.9125		2.5692	5.2415	2.8798
	2.5581	5.2479	2.93		2.9031	5.2642	2.9121		2.6052	5.2487	2.7449
	2.5931	5.2476	3.0902		2.9421	5.2697	2.7946		2.6392	5.2463	2.9586
	2.6281	5.2535	2.9819		2.9822	5.2693	2.7828		2.6742	5.2397	3.018
	2.6622	5.249	3.091		3.0212	5.2626	3.2029		2.7092	5.2391	3.004
	2.6972	5.2463	3.0114		3.0562	5.2788	2.4998		2.7452	5.242	3.1802
	2.7312	5.2514	2.9025		3.0972	5.2795	2.576		2.7802	5.2429	3.0232
	2.7652	5.2542	2.7761		3.1382	5.2744	3.1981		2.8152	5.2419	3.042
	2.7992	5.2543	3.0813		3.1782	5.2727	2.8655		2.8512	5.2453	3.0498
	2.8342	5.258	2.8153		3.2182	5.2738	2.8929		2.8852	5.2435	2.9433
	2.8672	5.2542	2.8358		3.2542	5.2774	2.9219		2.9202	5.239	3.2313
	2.9022	5.2539	3.3282		3.2902	5.2748	2.8688		2.9552	5.2505	2.6548
	2.9372	5.2613	2.9269		3.3312	5.2812	2.4485		2.9902	5.2445	3.23
	2.9712	5.2544	3.1229		3.3712	5.2755	2.6526		3.0252	5.2404	2.8313
	3.0052	5.2591	2.8247		3.4112	5.2786	3.1706		3.0602	5.2365	2.9687
	3.0412	5.2473	3.3937		3.4472	5.2765	2.6829		3.0962	5.2449	2.9792
	3.0762	5.2502	3.2189		3.4832	5.2772	2.7833		3.1322	5.2364	2.9956
	3.1102	5.2441	3.1304		3.5232	5.2795	2.7289		3.1682	5.249	2.8989
	3.1452	5.247	3.1247		3.5642	5.287	2.8224		3.2022	5.251	2.8085
	3.1802	5.2428	2.9289		3.6042	5.2773	2.954		3.2382	5.2463	2.8841
	3.2142	5.2465	2.8364		3.6402	5.2844	2.8983		3.2722	5.2441	3.0085
	3.2492	5.2482	2.9428		3.6812	5.2903	2.8847		3.3072	5.2402	2.9576
	3.2842	5.2556	2.8907		3.7172	5.2767	3.2136		3.3432	5.2309	3.2371
	3.3192	5.2671	2.5046		3.7582	5.2824	2.8135		3.3772	5.2377	2.8215
	3.3542	5.2482	3.0339		3.7982	5.2685	3.0647		3.4132	5.2474	2.6317
	3.3882	5.2522	2.8553		3.8352	5.2686	3.3479		3.4472	5.2492	2.4967
	3.4232	5.2424	3.177		3.8762	5.2684	3.0548		3.4832	5.2455	2.8025
	3.4592	5.2471	3.0465		3.9162	5.2802	2.9202		3.5172	5.237	3.0463
	3.4932	5.2442	3.2036		3.9532	5.2782	3.0456		3.5522	5.2504	2.701
	3.5282	5.2473	3.2541		3.9942	5.279	2.8144		3.5872	5.2478	2.9435
	3.5622	5.2453	3.0173		4.0302	5.2834	2.8404		3.6222	5.2515	2.7885
	3.5972	5.2504	3.1187		4.0702	5.2796	2.8685		3.6572	5.2452	2.8843
	3.6312	5.251	2.9805		4.1102	5.2778	2.9697		3.6923	5.2494	3.1791
	3.6652	5.2492	3.0909		4.1472	5.2754	2.7834		3.7293	5.2429	3.0329
	3.7002	5.2462	3.0162		4.1882	5.2795	3.0143		3.7653	5.2512	2.9371
	3.7352	5.2438	3.2218		4.2282	5.2722	3.3342		3.7993	5.2431	3.0532
	3.7702	5.2459	3.0471		4.2652	5.2908	2.5937		3.8343	5.2581	2.9985
	3.8042	5.2508	2.7788		4.3042	5.2821	2.7935		3.8693	5.2491	3.1241
	3.8392	5.2491	2.9304		4.3452	5.2851	3.0653		3.9043	5.2452	3.2327
	3.8742	5.2546	2.8478		4.3802	5.2857	2.8372		3.9393	5.2634	2.7313
	3.9092	5.2392	3.1781		4.4222	5.2757	3.2147		3.9743	5.2607	2.9207
	3.9442	5.2447	3.0376		4.4592	5.2876	2.9407		4.0103	5.2529	3.2972
	3.9782	5.2342	3.1556		4.4992	5.2783	3.2187		4.0453	5.242	3.4716
	4.0132	5.2403	3.0339		4.5402	5.2832	2.6418		4.0813	5.2376	3.4896
	4.0472	5.2353	3.2911		4.5792	5.2893	2.6803		4.1153	5.2516	3.0165
	4.0812	5.2524	3.0976		4.6152	5.2808	3.022		4.1503	5.2506	3.1294
	4.1152	5.2385	3.2078		4.6512	5.2782	2.9764		4.1853	5.2487	2.9557
	4.1502	5.2485	3.05		4.6912	5.2883	2.7236		4.2203	5.2495	2.9249
	4.1842	5.2322	3.395		4.7312	5.2843	2.9488		4.2553	5.2483	3.0257
	4.2192	5.2371	3.1391		4.7713	5.2862	3.1796		4.2903	5.2494	3.0551
	4.2542	5.2393	2.996		4.8083	5.287	2.7262		4.3253	5.2336	3.1637
	4.2892	5.2357	3.1179		4.8443	5.2977	2.7332		4.3613	5.2399	3.1056
	4.3232	5.2291	3.1868		4.8853	5.2906	2.6311		4.3963	5.2361	3.3857
	4.3582	5.2383	2.9149		4.9253	5.2969	2.9695		4.4313	5.2411	3.1723
	4.3932	5.2379	2.7495		4.9653	5.3008	2.6759		4.4663	5.2325	2.999
	4.4283	5.2378	3.1534		5.0043	5.3012	2.9136		4.5013	5.2373	3.1715
	4.4633	5.2263	3.1541		5.0393	5.2965	2.9885		4.5363	5.2351	3.1031
	4.4973	5.2288	3.1069		5.0793	5.3019	2.9197		4.5713	5.2346	3.0797
	4.5323	5.2397	2.842		5.1203	5.3017	2.5793		4.6063	5.2428	2.7614
	4.5673	5.2329	3.0455		5.1603	5.2904	3.4351		4.6423	5.2364	3.1575
	4.6023	5.2301	3.2014		5.2003	5.3076	2.5487		4.6773	5.2373	3.1725
	4.6373	5.2341	2.8758		5.2363	5.3033	3.0973		4.7123	5.2349	3.148
	4.6723	5.2362	3.0081		5.2733	5.2866	3.3781		4.7473	5.2458	2.8433
	4.7073	5.2482	2.7258		5.3133	5.2897	3.6016		4.7813	5.2383	3.0496
	4.7413	5.245	2.7645		5.3533	5.2874	3.0475		4.8163	5.2526	2.8131
	4.7763	5.2366	3.1755		5.3933	5.2834	3.215		4.8513	5.2533	2.7931
	4.8103	5.2438	3.1569		5.4293	5.2884	3.0275		4.8863	5.2518	2.9484
	4.8453	5.2417	2.9596		5.4653	5.2866	3.0401		4.9213	5.2453	2.9225
	4.8793	5.243	3.3485		5.5053	5.2894	2.9177		4.9563	5.2449	3.0203
	4.9143	5.2325	3.1394		5.5463	5.2806	3.2931		4.9923	5.2519	3.0559
	4.9493	5.2337	3.3036		5.5873	5.2842	3.3021		5.0283	5.25	2.9447
	4.9833	5.2303	2.8923		5.6233	5.2801	3.0422		5.0633	5.2483	2.9013
	5.0173	5.2378	2.6862		5.6633	5.2956	2.6613		5.0993	5.2476	2.976
	5.0523	5.2383	2.7011		5.7003	5.297	2.9985		5.1333	5.2492	3.045
	5.0873	5.2306	3.1263		5.7393	5.2995	2.9529		5.1683	5.2421	2.9832
	5.1223	5.2386	2.8516		5.7803	5.2878	3.1521		5.2043	5.2513	2.9792
	5.1573	5.2327	2.9668		5.8183	5.2909	3.2987		5.2383	5.2553	2.6564
	5.1923	5.2362	2.824		5.8583	5.3027	2.8458		5.2743	5.2555	2.612
	5.2273	5.2388	2.9245		5.8983	5.287	3.1249		5.3113	5.2568	2.9923
	5.2623	5.2375	2.9638		5.9333	5.2892	3.2196		5.3463	5.2576	2.9405
	5.2963	5.2531	2.6467		5.9733	5.2916	3.1898		5.3813	5.2591	2.6525
	5.3313	5.242	2.7287		6.0093	5.2958	2.8672		5.4164	5.2559	2.8507
	5.3663	5.2486	2.9004		6.0493	5.2873	3.0693		5.4514	5.248	2.8646
	5.4003	5.2539	2.7549		6.0903	5.2894	3.0635		5.4864	5.2439	3.0759
	5.4343	5.2554	3.0113		6.1263	5.2942	3.3716		5.5214	5.2548	2.6618
	5.4693	5.2552	2.7103		6.1673	5.2842	3.1296		5.5584	5.2523	2.8571
	5.5043	5.2562	2.9258		6.2033	5.2875	3.0789		5.5924	5.2523	2.9492
	5.5393	5.2559	2.8736		6.2443	5.2783	3.3061		5.6274	5.2405	3.1247
	5.5743	5.2652	2.749		6.2853	5.2707	3.3817		5.6624	5.2523	2.9885
	5.6083	5.2556	2.9226		6.3263	5.2725	3.2529		5.6974	5.258	2.8327
	5.6433	5.2512	2.8015		6.3613	5.2787	3.2335		5.7324	5.2529	3.1168
	5.6773	5.2609	2.3972		6.3973	5.2832	3.0936		5.7674	5.2526	2.8739
	5.7123	5.2626	2.7414		6.4373	5.2787	2.9751		5.8024	5.2478	3.1109
	5.7453	5.2594	2.7876		6.4773	5.2819	2.8713		5.8374	5.2508	3.1906
	5.7803	5.2546	2.7097		6.5174	5.289	2.8897		5.8734	5.2418	3.08
	5.8153	5.2668	2.6175		6.5544	5.2954	2.5372		5.9094	5.2544	2.9286
	5.8493	5.2444	3.329		6.5934	5.2911	2.8624		5.9434	5.2616	2.7471
	5.8843	5.2511	3.1005		6.6294	5.2928	2.8496		5.9784	5.26	3.2561
	5.9193	5.2568	2.7698		6.6704	5.2793	3.3021		6.0134	5.257	3.0653
	5.9533	5.2604	2.867		6.7104	5.2713	3.0131		6.0484	5.2545	3.1874
	5.9883	5.2602	2.6949		6.7514	5.2777	3.04		6.0844	5.2553	3.0791
	6.0233	5.2573	3.0457		6.7874	5.2865	2.9582		6.1184	5.2473	3.1182
	6.0573	5.251	3.3087		6.8234	5.2744	3.1509		6.1544	5.2559	2.9631
	6.0923	5.2543	2.7881		6.8644	5.2741	3.0584		6.1904	5.2549	3.0218
	6.1263	5.2547	2.9081		6.9044	5.2798	2.7979		6.2264	5.2512	3.2584
	6.1614	5.2678	2.5959		6.9464	5.2699	3.5125		6.2604	5.2486	3.1726
	6.1954	5.2604	2.8576		6.9874	5.2861	2.4967		6.2954	5.2421	3.5007
	6.2304	5.2577	2.7561		7.0214	5.2736	3.4976		6.3304	5.2377	3.3774
	6.2644	5.2612	3.2505		7.0614	5.2745	3.3484		6.3654	5.2393	3.1228
	6.3004	5.2603	3.0431		7.1014	5.2672	2.9377		6.4014	5.2385	3.2095
	6.3354	5.2581	3.0948		7.1424	5.2766	3.1073		6.4364	5.252	2.7724
	6.3704	5.2579	2.9825		7.1834	5.2721	3.0003		6.4724	5.2417	3.0738
	6.4054	5.2543	3.1673		7.2184	5.2735	3.0272		6.5084	5.2438	2.795
	6.4394	5.2513	3.5162		7.2574	5.2655	3.3319		6.5424	5.2454	2.9193
	6.4734	5.2541	3.166		7.2974	5.2721	3.1696		6.5774	5.2574	2.6319
	6.5084	5.2613	3.1869		7.3384	5.2619	2.9601		6.6124	5.2646	2.4373
	6.5424	5.2444	3.4593		7.3784	5.271	3.3998		6.6464	5.261	2.5459
	6.5764	5.2533	2.9852		7.4144	5.2654	3.051		6.6814	5.2687	2.5631
	6.6114	5.2563	3.1124		7.4504	5.2698	2.9689		6.7164	5.2636	2.8307
	6.6454	5.2639	2.5948		7.4914	5.2675	2.9325		6.7504	5.2631	2.8429
	6.6794	5.2586	3.0431		7.5304	5.2783	2.8948		6.7854	5.2639	2.8861
	6.7144	5.2571	2.9145		7.5714	5.2693	3.0338		6.8214	5.255	3.1475
	6.7494	5.2534	3.0776		7.6074	5.2714	2.801		6.8574	5.2575	2.8111
	6.7844	5.2516	3.1698		7.6474	5.272	2.8249		6.8924	5.249	3.1456
	6.8204	5.2534	3.0597		7.6844	5.2796	3.1179		6.9274	5.2522	2.811
	6.8544	5.2518	3.0271		7.7244	5.2802	2.5367		6.9624	5.2499	3.1183
	6.8884	5.2601	2.9687		7.7654	5.2852	2.7205		6.9974	5.2543	3.0087
	6.9234	5.2593	2.9826		7.8024	5.2878	2.7469		7.0324	5.2521	3.0969
	6.9584	5.2639	2.9806		7.8434	5.2896	2.7017		7.0684	5.2342	3.4665
	6.9924	5.2594	3.2856		7.8794	5.2953	2.5912		7.1044	5.2486	3.4106
	7.0264	5.2599	2.971		7.9214	5.2899	2.8475		7.1394	5.2322	3.7233
	7.0604	5.2599	2.8963		7.9634	5.2961	2.4812		7.1745	5.2394	3.2011
	7.0954	5.2568	2.9673		8.0004	5.2857	3.2525		7.2095	5.244	3.1451
	7.1304	5.2563	3.0635		8.0414	5.2795	3.3068		7.2445	5.2484	3.0064
	7.1654	5.253	3.0921		8.0834	5.2793	2.8202		7.2795	5.2471	3.0918
	7.2004	5.2641	2.8945		8.1204	5.2844	2.9537		7.3145	5.2462	3.1755
	7.2354	5.2621	2.8535		8.1604	5.2809	2.8527		7.3495	5.2518	2.9168
	7.2704	5.2549	2.9402		8.1964	5.2829	2.8605		7.3855	5.2392	3.2407
	7.3044	5.261	2.8217		8.2385	5.2829	3.0051		7.4205	5.2401	3.2615
	7.3384	5.2563	2.8784		8.2785	5.285	2.7578		7.4565	5.2473	3.071
	7.3734	5.2609	3.1246		8.3205	5.2949	2.6996		7.4905	5.2464	3.065
	7.4074	5.2562	3.0002		8.3565	5.2919	3.0066		7.5255	5.2346	3.3855
	7.4414	5.2605	3.0608		8.3925	5.2837	3.0556		7.5595	5.2319	3.0078
	7.4754	5.2645	3.0872		8.4325	5.2887	2.7514		7.5945	5.2431	2.8762
	7.5094	5.2541	3.2459		8.4725	5.2954	2.7314		7.6295	5.25	2.7589
	7.5434	5.2602	2.9939		8.5135	5.2936	3.0104		7.6645	5.247	2.9212
	7.5784	5.2555	2.903		8.5495	5.2878	2.8907		7.6995	5.2542	2.6727
	7.6154	5.2589	3.1499		8.5855	5.2919	2.9126		7.7355	5.2567	2.7828
	7.6494	5.2568	3.136		8.6255	5.2868	3.1294		7.7715	5.2463	3.077
	7.6834	5.2515	3.1245		8.6655	5.2906	3.3197		7.8065	5.2509	2.8937
	7.7184	5.2492	3.171		8.7055	5.2829	3.2494		7.8425	5.2497	3.1839
	7.7524	5.254	2.8804		8.7465	5.2822	3.3464		7.8765	5.2459	3.2968
	7.7864	5.2578	2.9214		8.7815	5.2768	3.2549		7.9125	5.2379	3.2473
	7.8204	5.255	3.2319		8.8215	5.2885	2.9535		7.9465	5.2405	3.0117
	7.8554	5.2467	3.1003		8.8625	5.2938	2.8534		7.9815	5.2429	3.1698
	7.8895	5.2417	3.5635		8.9025	5.2882	2.9629		8.0175	5.2494	2.8821
	7.9235	5.2499	3.202		8.9425	5.2818	2.9851		8.0525	5.2469	2.7581
	7.9575	5.2575	3.0881		8.9845	5.2809	3.2545		8.0885	5.2451	3.0885
	7.9905	5.2521	2.9598		9.0185	5.2877	2.9234		8.1235	5.2469	2.9862
	8.0255	5.2551	2.7334		9.0595	5.2769	3.1717		8.1585	5.2462	3.0267
	8.0605	5.245	3		9.0995	5.288	3.108		8.1935	5.2355	3.1324
	8.0955	5.2465	3.2408		9.1405	5.2759	3.3603		8.2285	5.2311	3.2707
	8.1305	5.2453	3.2295		9.1815	5.2826	3.0731		8.2645	5.2303	3.0984
	8.1655	5.2513	2.7852		9.2165	5.2802	3.1207		8.2985	5.2428	2.8805
	8.2005	5.2505	2.8097		9.2565	5.2903	2.9473		8.3345	5.2334	3.0082
	8.2345	5.2413	3.0014		9.2985	5.2851	2.8918		8.3695	5.2427	2.997
	8.2685	5.2509	2.8944		9.3885	5.2764	3.4515		8.4045	5.2388	3.3427
	8.3025	5.2424	2.9794		9.4285	5.2761	2.8682		8.4385	5.2317	3.1001
	8.3375	5.2415	3.0671		9.4715	5.2816	2.9363		8.4735	5.2425	2.6829
	8.3725	5.2369	3.5235		9.5075	5.2775	3.0642		8.5085	5.2387	3.12
	8.4075	5.2441	3.1689		9.5465	5.2804	3.0024		8.5435	5.2368	3.0728
	8.4415	5.2383	3.2104		9.5865	5.281	3.0197		8.5785	5.2447	2.9094
	8.4765	5.2342	3.3604		9.6265	5.286	2.7766		8.6135	5.2338	3.0341
	8.5115	5.2471	2.9976		9.6635	5.2797	2.8912		8.6495	5.2378	3.0516
	8.5465	5.2332	3.3		9.7035	5.2846	3.019		8.6845	5.2378	3.177
	8.5815	5.2338	3.1567		9.7385	5.2822	3.1487		8.7205	5.2263	3.2852
	8.6155	5.2346	3.0869		9.7785	5.284	2.8538		8.7555	5.2347	2.9184
	8.6505	5.2413	2.916		9.8185	5.2719	3.2303		8.7905	5.236	2.9148
	8.6845	5.2435	2.9795		9.8555	5.268	3.5687		8.8255	5.2463	2.7609
	8.7195	5.2498	2.8015		9.8945	5.2686	3.3082		8.8605	5.2447	2.8049
	8.7545	5.2386	3.1326		9.9305	5.2579	3.4298		8.8955	5.2296	3.0491
	8.7885	5.2326	3.1968		9.9705	5.2738	2.9596		8.9306	5.2323	3.1213
	8.8225	5.2314	3.0993		10.0116	5.2622	3.31		8.9666	5.2384	2.9797
	8.8575	5.2255	3.3689		10.0486	5.2596	3.1737		9.0026	5.237	2.9696
	8.8915	5.2363	3.1064		10.0876	5.2489	3.3127		9.0376	5.2418	2.8982
	8.9255	5.2419	3.1158		10.1306	5.2753	2.8422		9.0726	5.2431	2.8308
	8.9605	5.2364	3.279		10.1676	5.2715	2.9252		9.1076	5.2526	2.6278
	8.9955	5.2281	3.3755		10.2076	5.2629	3.0688		9.1426	5.2618	2.7761
	9.0305	5.2363	2.975		10.2446	5.2522	3.7438		9.1776	5.2361	3.3387
	9.0655	5.2373	2.9807		10.2856	5.2728	3.0112		9.2116	5.2366	3.1736
	9.1005	5.2285	3.1034		10.3266	5.2709	2.5326		9.2466	5.253	2.734
	9.1355	5.2454	2.7456		10.3686	5.2791	2.9803		9.2826	5.2456	2.9865
	9.1705	5.2567	2.4837		10.4066	5.276	2.5589		9.3186	5.2402	3.2663
	9.2045	5.2433	2.7385		10.4446	5.2664	3.3097		9.3536	5.2314	3.2988
	9.2385	5.2468	2.797		10.4846	5.2728	3.0308		9.3886	5.2348	3.2036
	9.2735	5.2448	2.7197		10.5256	5.2652	3.1426		9.4226	5.2288	3.4194
	9.3095	5.2463	2.7776		10.5656	5.2763	2.7754		9.4576	5.2385	2.9542
	9.3445	5.2483	2.7659		10.6026	5.2738	3.077		9.4926	5.241	3.2825
	9.3805	5.2442	3.0733		10.6386	5.2796	2.7361		9.5276	5.2338	3.0581
	9.4135	5.2413	3.0341		10.6796	5.2776	2.819		9.5636	5.2319	3.1446
	9.4485	5.2443	2.8821		10.7196	5.2629	3.1415		9.5986	5.2305	2.9968
	9.4825	5.2522	2.761		10.7606	5.2636	3.1851		9.6346	5.2318	3.2532
	9.5165	5.2408	3.3662		10.7996	5.2552	3.138		9.6686	5.2312	3.0388
	9.5495	5.2453	3.0124		10.8336	5.2683	3.2255		9.7036	5.2338	3.0071
	9.5835	5.2338	3.5563		10.8736	5.2619	3.2651		9.7376	5.2346	2.8672
	9.6185	5.2364	3.0932		10.9146	5.2465	3.5773		9.7726	5.2316	2.952
	9.6526	5.2451	2.836		10.9626	5.2507	3.1991		9.8076	5.2371	2.8164
	9.6876	5.2459	2.7257		11.0026	5.2573	3.1166		9.8436	5.2382	2.812
	9.7226	5.2493	2.9691		11.0386	5.2622	2.9464		9.8776	5.2413	2.6762
	9.7566	5.2452	2.8079		11.0756	5.2649	2.9425		9.9136	5.2452	2.6712
	9.7926	5.2469	2.6387		11.1156	5.2593	2.816		9.9496	5.2457	2.7464
	9.8276	5.2465	2.9659		11.1576	5.2663	2.8933		9.9846	5.2436	2.72
	9.8626	5.2476	2.8204		11.1976	5.2688	2.7155		10.0196	5.2329	2.9028
	9.8966	5.2509	2.8499		11.2326	5.2715	2.8105		10.0546	5.24	2.9394
	9.9316	5.2491	2.9771		11.2696	5.2724	2.6924		10.0906	5.2412	2.8248
	9.9666	5.2496	3.1051		11.3106	5.2736	2.7197		10.1256	5.2461	2.616
	10.0006	5.2508	3.1837		11.3506	5.2761	3.0642		10.1616	5.2563	2.3477
	10.0346	5.2433	3.3675		11.3916	5.2733	2.8495		10.1966	5.2585	2.6174
	10.0686	5.2437	3.3349		11.4316	5.2769	2.9868		10.2326	5.2439	2.9344
	10.1036	5.2521	3.1105		11.4686	5.2736	2.7276		10.2676	5.2516	2.8293
	10.1376	5.2445	2.9781		11.5046	5.2672	2.9202		10.3026	5.2462	2.8109
	10.1716	5.2528	2.7824		11.5456	5.2741	2.7438		10.3386	5.246	3.1429
	10.2076	5.2511	2.9601		11.5876	5.2793	3.1475		10.3726	5.2546	2.5695
	10.2436	5.2309	3.4266		11.6286	5.2863	2.5084		10.4086	5.2489	2.8361
	10.2776	5.2475	2.9465		11.6656	5.2631	3.289		10.4426	5.2563	2.7887
	10.3116	5.2441	2.8279		11.7066	5.2821	2.6492		10.4796	5.254	2.8706
	10.3466	5.2457	2.8882		11.7437	5.2718	3.1527		10.5146	5.2536	2.6222
	10.3816	5.242	3.1053		11.7847	5.2707	3.1036		10.5496	5.2523	3.1439
	10.4166	5.2399	2.9559		11.8267	5.2739	3.1206		10.5836	5.2414	3.3867
	10.4516	5.2372	3.0943		11.8627	5.2737	2.9835		10.6196	5.2512	2.8893
	10.4866	5.239	3.1038		11.9047	5.2706	2.9879		10.6537	5.2568	2.908
	10.5206	5.2463	3.0081		11.9427	5.2691	3.1266		10.6887	5.2396	3.2889
	10.5566	5.245	3.1563		11.9837	5.2674	2.8516		10.7237	5.2497	3.1368
	10.5906	5.2311	3.2982		12.0257	5.2632	3.2474		10.7587	5.2492	3.317
	10.6246	5.2399	3.1585		12.0637	5.2754	3.0302		10.7937	5.2471	3.1052
	10.6606	5.2346	3.2296		12.1067	5.2784	3.0104		10.8297	5.2427	3.4376
	10.6946	5.2361	3.2804		12.1467	5.2816	2.4374		10.8657	5.249	3.1334
	10.7286	5.2444	3.0852		12.1837	5.2716	3.3136		10.8997	5.2428	3.2551
	10.7636	5.2324	3.1252		12.2247	5.2688	3.0367		10.9347	5.2403	3.1782
	10.7976	5.2379	2.9336		12.2617	5.2697	2.9907		10.9697	5.2434	3.2372
	10.8326	5.2448	2.8358		12.3047	5.2828	2.6987		11.0047	5.2382	3.0082
	10.8676	5.2355	2.8901		12.3457	5.2787	2.6035		11.0397	5.2467	3.132
	10.9016	5.2421	2.6594		12.3857	5.274	3.2512		11.0747	5.2533	2.7986
	10.9356	5.2458	2.4394		12.4237	5.2805	2.7368		11.1097	5.2523	2.9477
	10.9706	5.2582	2.5809		12.4607	5.2822	2.7785		11.1437	5.2587	2.5819
	11.0056	5.2526	2.7608		12.4997	5.276	3.0308		11.1797	5.2646	2.844
	11.0406	5.2579	2.4249		12.5397	5.2809	2.8388		11.2147	5.2488	3.2165
	11.0756	5.2513	2.8294		12.5797	5.2845	2.6773		11.2507	5.253	3.1606
	11.1106	5.2549	2.8049		12.6157	5.2985	2.4781		11.2847	5.2492	3.1772
	11.1446	5.2554	3.0818		12.6517	5.2827	2.8646		11.3197	5.2487	3.2309
	11.1776	5.2524	3.0126		12.6917	5.2845	3.3035		11.3547	5.2443	3.3466
	11.2126	5.2543	2.9426		12.7317	5.2894	2.9826		11.3897	5.2406	3.2835
	11.2466	5.2436	3.0343		12.7717	5.2844	2.8309		11.4257	5.251	3.0148
	11.2816	5.2369	3.209		12.8117	5.2946	3.0408		11.4617	5.2447	3.2534
	11.3156	5.2427	2.9873		12.8457	5.294	2.6455		11.4977	5.2408	3.2171
	11.3496	5.2532	2.9981		12.8867	5.2879	2.8243		11.5327	5.2419	3.3044
	11.3836	5.2479	2.575		12.9267	5.291	3.3266		11.5667	5.2509	2.8085
	11.4187	5.2445	3.123		12.9667	5.2713	3.2802		11.6017	5.2493	3.0676
	11.4547	5.2523	2.8854		13.0077	5.2838	2.961		11.6367	5.248	3.3152
	11.4897	5.2406	3.1688		13.0447	5.2815	3.3573		11.6727	5.2464	3.2348
	11.5237	5.2393	3.1487		13.0817	5.2841	2.9802		11.7067	5.2447	3.2653
	11.5587	5.2455	3.0978		13.1217	5.2873	3.0662		11.7427	5.2392	3.3011
	11.5927	5.2464	3.1659		13.1617	5.2841	2.8924		11.7787	5.2396	3.2327
	11.6277	5.2457	3.2043		13.2027	5.2789	3.0855		11.8137	5.2343	3.2457
	11.6617	5.2409	3.4758		13.2397	5.2827	3.0911		11.8477	5.2275	3.5408
	11.6967	5.2357	3.4651		13.2757	5.2789	3.3269		11.8837	5.2204	3.4266
	11.7317	5.2312	3.3188		13.3167	5.2818	3.071		11.9187	5.2373	2.9628
	11.7667	5.2278	3.4896		13.3577	5.2774	3.257		11.9547	5.2326	3.2957
	11.8017	5.2295	3.1484		13.3977	5.2866	2.8929		11.9887	5.2358	2.9948
	11.8367	5.236	3.0238		13.4337	5.2905	2.7182		12.0247	5.2292	3.0432
	11.8717	5.2392	2.831		13.4738	5.2893	2.9785		12.0597	5.2291	3.0277
	11.9067	5.2292	3.0919		13.5098	5.2994	2.5149		12.0957	5.2399	2.7928
	11.9407	5.2506	2.7217		13.5498	5.2936	2.7662		12.1307	5.2354	2.7695
	11.9757	5.2384	3.0143		13.5898	5.2853	3.1126		12.1667	5.2299	3.1256
	12.0097	5.2353	2.9861		13.6258	5.3067	2.3124		12.2007	5.2296	2.8834
	12.0447	5.2357	2.9926		13.6668	5.2942	2.9167		12.2357	5.2296	3.0096
	12.0787	5.2307	3.2345		13.7078	5.2955	2.954		12.2707	5.2336	3.0875
	12.1137	5.2366	3.3067		13.7428	5.2952	2.7144		12.3067	5.2408	2.7343
	12.1477	5.2428	3.0644		13.7828	5.2914	2.7684		12.3417	5.2438	2.6789
	12.1817	5.2344	3.1127		13.8238	5.2905	3.1112		12.3777	5.2434	2.9963
	12.2167	5.2314	3.4132		13.8598	5.2782	3.1166		12.4118	5.2435	2.8083
	12.2527	5.2362	3.1816		13.9008	5.2891	2.7047		12.4468	5.2427	3.0337
	12.2877	5.2371	2.9402		13.9378	5.2792	3.377		12.4828	5.2411	2.8561
	12.3227	5.2318	3.1573		13.9788	5.286	3.1894		12.5168	5.2318	3.2371
	12.3577	5.2249	3.2371		14.0188	5.2859	2.9395		12.5528	5.2394	3.1237
	12.3917	5.224	2.9234		14.0548	5.2857	3.1856		12.5878	5.2309	3.1635
	12.4257	5.2235	3.241		14.0958	5.2897	2.874		12.6228	5.2267	3.2832
	12.4607	5.2359	2.9323		14.1368	5.2754	2.9607		12.6578	5.2256	3.3925
	12.4947	5.2366	2.6785		14.1718	5.2796	3.0485		12.6938	5.2258	3.1933
	12.5297	5.2289	2.9431		14.2128	5.2827	3.0691		12.7288	5.2259	3.2513
	12.5647	5.2322	2.9488		14.2488	5.285	2.9103		12.7638	5.2269	2.905
	12.5987	5.2385	2.9924		14.2898	5.2879	2.7899		12.7998	5.2221	3.1262
	12.6337	5.244	2.7889		14.3318	5.2886	2.9668		12.8338	5.2245	3.0582
	12.6687	5.238	2.9182		14.3728	5.2751	3.2932		12.8688	5.2233	3.1945
	12.7027	5.2396	2.9676		14.4098	5.2911	2.9566		12.9048	5.2197	2.9542
	12.7377	5.2416	3.0101		14.4458	5.3047	2.6374		12.9408	5.2139	3.3054
	12.7717	5.2307	3.4893		14.4868	5.3014	2.7815		12.9768	5.2221	3.0485
	12.8057	5.2352	3.0739		14.5268	5.2893	2.694		13.0118	5.2204	3.218
	12.8407	5.2329	2.877		14.5678	5.285	3.1665		13.0468	5.2213	3.1429
	12.8747	5.2253	3.1061		14.6038	5.288	3.0491		13.0818	5.2245	2.978
	12.9097	5.2352	2.8859		14.6398	5.291	3.0229		13.1168	5.221	2.9397
	12.9447	5.2407	2.803		14.6798	5.2864	2.9954		13.1518	5.229	2.8491
	12.9797	5.2331	3.0483		14.7208	5.282	3.3161		13.1878	5.2266	2.8508
	13.0137	5.235	2.7553		14.7608	5.281	3.2951		13.2238	5.2278	2.8038
	13.0477	5.2346	3.0458		14.8008	5.2857	3.0376		13.2588	5.2233	2.9649
	13.0827	5.2338	3.2149		14.8348	5.2857	3.3028		13.2948	5.2247	3.016
	13.1187	5.2335	3.1185		14.8748	5.2846	3.1517		13.3298	5.2196	3.2663
	13.1528	5.226	3.3471		14.9168	5.2926	2.7667		13.3638	5.2268	2.819
	13.1878	5.2297	3.0978		14.9568	5.293	3.1226		13.3988	5.2251	2.7617
	13.2218	5.2336	3.2535		14.9978	5.2818	3.1194		13.4338	5.2268	3.0533
	13.2558	5.2228	3.1448		15.0338	5.2851	2.9701		13.4698	5.2179	3.0877
	13.2908	5.24	3.1086		15.0708	5.2705	3.3485		13.5048	5.2253	3.0778
	13.3258	5.229	3.2581		15.1108	5.2791	3.1116		13.5408	5.2346	2.8204
	13.3598	5.2324	3.0853		15.1518	5.2861	2.8399		13.5768	5.2298	3.0353
	13.3948	5.2364	2.8612		15.1938	5.2762	3.1502		13.6108	5.2284	3.047
	13.4298	5.2352	2.8166		15.2299	5.2767	2.8729		13.6458	5.235	2.8852
	13.4658	5.2316	3.0034		15.2669	5.2882	2.8949		13.6818	5.2278	3.0245
	13.5008	5.2178	3.0842		15.3069	5.285	2.7796		13.7158	5.2321	2.9689
	13.5368	5.2226	3.2241		15.3479	5.2745	3.4649		13.7518	5.2363	2.803
	13.5708	5.2222	3.0463		15.3899	5.2763	2.9824		13.7868	5.2252	3.0602
	13.6058	5.2296	2.9564		15.4269	5.2798	3.1408		13.8228	5.2306	3.0357
	13.6398	5.2385	2.584		15.4679	5.2782	3.142		13.8578	5.226	2.9292
	13.6748	5.2391	2.6843		15.5029	5.2725	3.1177		13.8938	5.2266	3.0639
	13.7088	5.2445	2.3993		15.5429	5.2811	2.804		13.9278	5.2326	2.9538
	13.7438	5.236	2.7443		15.5839	5.2754	3.3107		13.9628	5.2288	2.9644
	13.7788	5.2385	2.6642		15.6199	5.2752	3.0878		13.9978	5.2262	2.9508
	13.8138	5.2423	2.7378		15.6609	5.27	3.2847		14.0328	5.2292	2.7488
	13.8498	5.2533	2.5484		15.7019	5.2592	3.5583		14.0688	5.2304	2.8268
	13.8858	5.2367	3.1085		15.7389	5.2732	2.7259		14.1048	5.2257	2.8597
	13.9208	5.237	2.7895		15.7809	5.2817	2.6542		14.1408	5.229	3.0948
	13.9558	5.2447	2.8503		15.8179	5.2848	3.0602		14.1759	5.2351	2.9217
	13.9898	5.2491	2.9661		15.8589	5.2891	2.4758		14.2109	5.2277	3.0558
	14.0248	5.2442	3.022		15.9009	5.2823	2.8397		14.2459	5.2336	2.6931
	14.0598	5.2412	3.1259		15.9379	5.2745	3.0627		14.2819	5.2283	2.9254
	14.0948	5.2407	3.3425		15.9799	5.2785	2.8264		14.3179	5.2411	2.7401
	14.1288	5.246	3.0552		16.0209	5.2893	2.8097		14.3529	5.2348	2.7935
	14.1648	5.2413	3.1506		16.0579	5.2796	2.8032		14.3889	5.2339	2.8838
	14.1998	5.2456	3.0965		16.0979	5.2828	2.8503		14.4249	5.2395	2.7861
	14.2348	5.2395	3.3239		16.1389	5.2963	2.7235		14.4589	5.2386	2.7651
	14.2698	5.2351	3.1776		16.1759	5.2943	2.654		14.4939	5.2374	3.1086
	14.3048	5.2449	2.9219		16.2159	5.2834	2.7962		14.5289	5.2453	2.774
	14.3388	5.2402	3.1521		16.2519	5.2905	2.9653		14.5639	5.2432	2.834
	14.3728	5.238	2.9899		16.2929	5.2936	3.0898		14.5989	5.247	2.8259
	14.4068	5.2473	2.8783		16.3329	5.2937	2.653		14.6349	5.245	3.0788
	14.4418	5.2452	2.9138		16.3729	5.2903	2.9875		14.6709	5.2376	2.9536
	14.4758	5.2435	2.7158		16.4099	5.2934	2.9955		14.7059	5.2381	2.9103
	14.5108	5.2407	2.6242		16.4459	5.2966	2.7749		14.7409	5.2301	3.1447
	14.5458	5.2472	2.8446		16.4869	5.2974	2.6726		14.7759	5.2403	3.1388
	14.5818	5.2422	3.0415		16.5279	5.2962	3.1943		14.8109	5.2349	3.1154
	14.6158	5.2462	2.7755		16.5689	5.2932	2.712		14.8459	5.2441	2.8848
	14.6498	5.2489	2.9136		16.6059	5.3005	2.8897		14.8819	5.2396	2.9311
	14.6848	5.2486	2.8376		16.6419	5.298	2.9844		14.9159	5.2467	2.9253
	14.7188	5.2413	3.0421		16.6829	5.2963	2.9437		14.9529	5.2397	3.0051
	14.7528	5.2303	3.42		16.7239	5.293	3.0221		14.9889	5.2446	2.7201
	14.7868	5.2379	2.9337		16.7649	5.2945	3.1696		15.0239	5.2458	2.9171
	14.8218	5.2337	3.0724		16.8059	5.2886	2.9757		15.0579	5.2437	2.892
	14.8568	5.2358	3.1265		16.8389	5.2899	3.0882		15.0939	5.2377	2.9947
	14.8919	5.2394	3.1206		16.8799	5.2896	2.8884		15.1279	5.2364	2.8558
	14.9259	5.2292	3.0758		16.9199	5.2867	3.1371		15.1629	5.239	2.8305
	14.9599	5.226	2.8074		16.9609	5.2948	2.8847		15.1979	5.2369	2.8938
	14.9959	5.2345	2.8254		17.003	5.2897	2.9157		15.2339	5.2469	2.7527
	15.0309	5.2284	2.8379		17.039	5.2892	2.9808		15.2699	5.2441	2.7338
	15.0649	5.2331	2.7592		17.074	5.2948	2.7527		15.3049	5.2535	2.7538
	15.0999	5.2428	2.5782		17.116	5.2981	2.8718		15.3399	5.2523	2.8179
	15.1339	5.2403	2.8953		17.16	5.3006	2.8717		15.3749	5.2506	2.5186
	15.1679	5.2569	2.7655		17.2	5.3043	2.8566		15.4099	5.2584	2.6608
	15.2029	5.2412	3.153		17.236	5.2888	3.0569		15.4449	5.2554	2.8689
	15.2379	5.2376	3.2158		17.273	5.2923	3.1201		15.4799	5.2501	2.9909
	15.2729	5.2437	2.8972		17.314	5.2862	3.2497		15.5159	5.2407	3.2075
	15.3069	5.2395	3.1935		17.355	5.2953	3.2123		15.5519	5.2358	3.42
	15.3409	5.235	3.1419		17.396	5.2916	2.9687		15.5879	5.2304	3.3728
	15.3749	5.2371	2.9762		17.435	5.2974	3.0619		15.6229	5.2339	3.361
	15.4099	5.2301	3.2481		17.475	5.2933	2.8246		15.6579	5.2232	3.2943
	15.4449	5.2515	2.651		17.512	5.2986	3.0053		15.6929	5.222	3.2757
	15.4799	5.2288	3.2869		17.554	5.3007	2.9551		15.7269	5.2279	3.3778
	15.5149	5.2331	3.2381		17.595	5.2961	2.8378		15.7619	5.2227	3.3863
	15.5499	5.2413	2.7334		17.632	5.2921	3.279		15.7969	5.2199	3.389
	15.5839	5.2465	2.9545		17.672	5.299	3.04		15.8329	5.2219	3.2507
	15.6189	5.2304	3.3438		17.714	5.2983	3.0217		15.8679	5.2319	3.3719
	15.6529	5.2473	2.9152		17.751	5.3005	3.0216		15.903	5.2165	3.2295
	15.6869	5.248	2.8618		17.791	5.2986	2.8294		15.938	5.2253	2.8798
	15.7199	5.2421	3.1767		17.827	5.2985	2.7122		15.973	5.2183	3.1226
	15.7539	5.2404	3.1688		17.867	5.2985	2.8998		16.008	5.2292	2.7861
	15.7879	5.2422	2.9013		17.908	5.3003	3.0277		16.043	5.225	3.2388
	15.8229	5.2427	2.9252		17.945	5.2816	3.261		16.078	5.2368	2.7414
	15.8579	5.2391	2.6784		17.986	5.2889	3.1284		16.113	5.2327	2.9748
	15.8939	5.2341	3.3631		18.023	5.3005	3.0377		16.148	5.2329	2.8646
	15.9289	5.2335	3.0941		18.064	5.2912	3.1313		16.185	5.2286	3.009
	15.9629	5.2358	3.0521		18.105	5.297	3.0085		16.22	5.2416	2.6923
	15.9979	5.2297	3.0407		18.145	5.2735	3.4384		16.256	5.2318	2.9036
	16.0319	5.2449	2.6554		18.182	5.2856	2.7562		16.29	5.2439	2.6295
	16.0669	5.2444	2.9171		18.217	5.2807	3.1918		16.325	5.2325	3.1839
	16.1009	5.2428	3.0368		18.258	5.2794	3.0615		16.36	5.2286	2.9921
	16.1359	5.2383	2.8529		18.299	5.2877	3.0579		16.395	5.2406	2.7702
	16.1699	5.2416	2.9487		18.34	5.2909	2.7782		16.432	5.2365	2.7927
	16.2039	5.2402	3.229		18.377	5.2869	3.0028		16.468	5.2423	2.8603
	16.2389	5.2393	2.982		18.418	5.2899	2.976		16.502	5.251	2.6344
	16.2739	5.2385	3.1477		18.455	5.2935	2.8994		16.537	5.2461	2.9441
	16.3079	5.2434	3.14		18.495	5.2821	3.495		16.572	5.2416	3.0295
	16.3439	5.2409	2.978		18.536	5.2899	2.919		16.608	5.2391	3.1594
	16.3779	5.2454	2.7851		18.576	5.2945	2.5284		16.642	5.2459	2.7175
	16.4119	5.2417	3.0488		18.611	5.2918	3.1566		16.677	5.2331	3.0593
	16.4469	5.2405	2.9882		18.648	5.2878	3.3675		16.713	5.2346	3.1782
	16.4819	5.2386	3.2096		18.687	5.2977	2.8151		16.748	5.233	3.2996
	16.5169	5.2376	3.0898		18.7281	5.2986	2.6821		16.784	5.2377	3.003
	16.5519	5.2434	2.8532		18.7691	5.2898	3.0563		16.819	5.2419	2.8412
	16.5859	5.2403	2.8387		18.8091	5.29	3.1124		16.854	5.243	2.9324
	16.6199	5.2324	3.0358		18.8431	5.2877	3.1726		16.889	5.2385	3.2846
	16.654	5.2367	3.1473		18.8841	5.2887	2.8342		16.924	5.2416	2.941
	16.689	5.2461	2.7976		18.9241	5.2895	3.045		16.959	5.2493	2.8332
	16.723	5.2443	2.9325		18.9641	5.2918	2.8492		16.994	5.2474	2.9706
	16.759	5.2474	2.8826		19.0051	5.2853	3.2589		17.03	5.2443	3.0341
	16.794	5.244	3.0541		19.0401	5.2938	2.6299		17.066	5.2465	2.8726
	16.829	5.2446	3.209		19.0801	5.3024	2.7621		17.101	5.2451	3.0855
	16.863	5.2299	3.6574		19.1211	5.3013	2.7567		17.136	5.2391	2.8822
	16.898	5.2417	3.3466		19.1611	5.3005	2.7137		17.171	5.2374	3.3138
	16.932	5.2333	3.1601		19.2021	5.2867	3.0885		17.206	5.2413	2.9608
	16.967	5.2358	3.1406		19.2391	5.2938	3.1393		17.241	5.2292	3.1974
	17.002	5.2348	3.0691		19.2761	5.299	2.8434		17.276	5.2421	2.7597
	17.036	5.2513	2.6522		19.3181	5.3027	2.8895		17.311	5.2394	2.769
	17.071	5.2366	3.1725		19.3601	5.2964	3.09		17.346	5.2376	2.813
	17.105	5.2367	2.7487		19.4011	5.3027	2.8047		17.382	5.2434	2.8798
	17.139	5.2356	3.0122		19.4381	5.3052	2.8923		17.417	5.251	2.5033
	17.174	5.2362	2.9298		19.4811	5.2924	3.4112		17.452	5.2502	2.7367
	17.209	5.239	2.9678		19.5181	5.2938	3.0017		17.487	5.2419	2.8342
	17.244	5.2434	2.6352		19.5581	5.2897	3.0877		17.522	5.2541	2.581
	17.278	5.2417	2.8524		19.5981	5.2873	3.3697		17.557	5.2527	2.7186
	17.313	5.2422	3.0075		19.6351	5.2953	2.916		17.593	5.2522	3.0221
	17.347	5.2436	2.8666		19.6771	5.295	3.1505		17.629	5.249	2.9229
	17.382	5.2515	2.8733		19.7141	5.2937	2.9449		17.6651	5.2528	2.7262
	17.417	5.2354	3.3061		19.7571	5.2961	3.3159		17.7001	5.2529	2.9726
	17.452	5.2382	3.074		19.7991	5.2809	3.5123		17.7361	5.2465	2.9561
	17.488	5.2373	3.216		19.8361	5.2821	3.176		17.7701	5.2501	3.0896
	17.524	5.2397	2.9997		19.8781	5.2832	3.4272		17.8051	5.2477	3.0954
	17.558	5.2332	3.1949		19.9201	5.2907	2.9007		17.8401	5.2549	2.8385
	17.594	5.2371	3.0108		19.9581	5.295	3.128		17.8761	5.2506	3.0253
	17.628	5.232	3.1696		20.0001	5.288	3.1043		17.9121	5.253	2.6117
	17.662	5.2472	2.7465		20.0371	5.2798	2.9553		17.9481	5.252	3.0345
	17.697	5.2386	3.0393		20.0781	5.2816	3.045		17.9831	5.2477	3.0245
	17.731	5.2342	3.0798		20.1191	5.2837	2.7594		18.0171	5.2456	3.3074
	17.765	5.2385	2.9294		20.1601	5.2837	3.232		18.0521	5.2398	3.137
	17.8	5.226	3.2464		20.1971	5.2867	3.0425		18.0871	5.2391	3.409
	17.835	5.2341	2.846		20.2331	5.287	3.0649		18.1231	5.2419	3.1701
	17.87	5.233	2.9067		20.2741	5.2956	2.8739		18.1581	5.239	3.2043
	17.906	5.2411	2.9087		20.3161	5.2892	3.2328		18.1941	5.2564	2.4441
	17.941	5.2491	2.378		20.3571	5.2834	2.8702		18.2301	5.2507	3.1091
	17.976	5.2475	2.8348		20.3941	5.2791	3.4523		18.2651	5.2471	3.0653
	18.011	5.2472	2.9342		20.4291	5.2809	3.341		18.2991	5.245	3.2796
	18.045	5.2399	3.1232		20.4702	5.272	3.4767		18.3341	5.2443	3.3333
	18.08	5.2389	2.997		20.5112	5.2741	3.1141		18.3701	5.2418	3.3846
	18.115	5.2478	2.7979		20.5522	5.2773	3.1399		18.4041	5.2392	3.23
	18.149	5.2436	3.3182		20.5932	5.274	2.807		18.4391	5.2347	3.3466
	18.184	5.24	3.1326		20.6272	5.2807	2.8679		18.4761	5.2344	3.2143
	18.218	5.2374	3.296		20.6682	5.2803	3.0229		18.5111	5.2413	3.0082
	18.252	5.2472	2.9411		20.7102	5.2741	2.9635		18.5461	5.2473	3.0564
	18.288	5.2433	3.0206		20.7502	5.2728	3.3583		18.5821	5.2403	3.0627
	18.323	5.2491	2.8631		20.7912	5.2715	2.8932		18.6171	5.2334	3.4661
	18.358	5.2558	2.8804		20.8322	5.291	2.7076		18.6511	5.2337	2.8284
	18.3931	5.2446	2.9842		20.8662	5.2834	3.0684		18.6861	5.2333	3.2766
	18.4281	5.2494	2.8255		20.9072	5.2823	3.2301		18.7211	5.2362	2.828
	18.4621	5.2426	2.9355		20.9472	5.2783	2.9564		18.7561	5.237	2.8054
	18.4961	5.2496	2.6854		20.9982	5.2797	3.0917		18.7921	5.2326	2.9443
	18.5311	5.2492	2.736		21.0412	5.2911	2.6894		18.8281	5.2371	2.8638
	18.5661	5.248	2.7847		21.0762	5.2898	2.9736		18.8631	5.231	3.018
	18.6001	5.2468	2.8332		21.1182	5.2853	3.1082		18.8971	5.2328	2.9376
	18.6341	5.2428	3.0032		21.1602	5.2754	2.9563		18.9321	5.2337	3.1327
	18.6681	5.2384	3.0785		21.2012	5.2939	2.6687		18.9671	5.2422	2.6769
	18.7031	5.2447	3.2153		21.2432	5.286	2.8863		19.0021	5.2448	2.6266
	18.7381	5.2451	3.0788		21.2792	5.2879	3.0921		19.0371	5.2484	2.8762
	18.7731	5.2434	3.1774		21.3152	5.2828	3.1137		19.0721	5.2493	2.8586
	18.8081	5.2445	3.2607		21.3572	5.2871	3.1543		19.1121	5.2417	3.0596
	18.8421	5.2381	3.2925		21.3992	5.2835	2.7479		19.1491	5.2542	2.7142
	18.8761	5.2431	3.1738		21.4392	5.2868	3.2053		19.1841	5.2548	2.9358
	18.9111	5.2394	2.8023		21.4762	5.2976	2.4238		19.2191	5.2541	2.7777
	18.9461	5.2314	3.224		21.5172	5.2932	3.0883		19.2541	5.2613	2.673
	18.9811	5.2368	2.9713		21.5542	5.2878	3.0177		19.2901	5.2615	2.627
	19.0151	5.2369	2.9362		21.5942	5.2833	3.067		19.3261	5.2518	2.8912
	19.0491	5.2371	2.7671		21.6352	5.2833	3.1142		19.3621	5.2474	3.087
	19.0831	5.2371	2.686		21.6702	5.2816	3.1113		19.3982	5.2494	2.9706
	19.1181	5.2365	3.0136		21.7102	5.2795	3.1551		19.4332	5.2492	2.86
	19.1531	5.2506	2.7627		21.7462	5.2803	2.817		19.4682	5.2468	3.1024
	19.1881	5.2435	3.1456		21.7872	5.2888	2.5013		19.5032	5.2517	2.9512
	19.2231	5.2469	3.0269		21.8282	5.279	3.1038		19.5382	5.2376	3.3453
	19.2571	5.2379	3.1229		21.8932	5.2898	2.702		19.5742	5.2408	3.012
	19.2921	5.2434	3.1734		21.9342	5.281	3.2736		19.6102	5.2433	3.1429
	19.3271	5.2368	3.417		21.9762	5.2846	2.831		19.6472	5.2425	3.1111
	19.3611	5.2404	3.1587		22.0152	5.2743	3.5024		19.6822	5.2457	2.9613
	19.3961	5.232	3.2682		22.0572	5.2846	2.96		19.7172	5.2435	2.848
	19.4311	5.244	2.9176		22.0952	5.2886	2.8843		19.7522	5.2448	3.1121
	19.4651	5.2388	2.6987		22.1372	5.2753	3.1738		19.7872	5.2389	3.2775
	19.4991	5.2407	2.8391		22.1822	5.2943	2.5622		19.8242	5.2359	3.0968
	19.5351	5.2378	2.9372		22.2243	5.2912	2.828		19.8712	5.2441	3.1069
	19.5701	5.2317	3.0692		22.2663	5.2879	3.18		19.9132	5.2415	3.1096
	19.6051	5.2429	2.6664		22.3073	5.2882	2.674		19.9522	5.2332	3.1353
	19.6391	5.2469	2.5512		22.3523	5.292	3.0459		19.9932	5.2382	3.1897
	19.6731	5.2456	2.726		22.3973	5.2894	3.1619		20.0312	5.2348	3.4588
	19.7071	5.2526	2.87		22.4433	5.2812	3.0651		20.0672	5.2398	3.188
	19.7411	5.2438	3.1229		22.4843	5.2964	2.5835		20.1012	5.239	3.0959
	19.7751	5.2484	3.083		22.5233	5.298	2.8549		20.1362	5.2395	3.1678
	19.8091	5.2506	2.8256		22.5663	5.2818	3.1766		20.1742	5.2419	3.1344
	19.8441	5.2449	3.0777		22.6113	5.2848	3.4074		20.2112	5.247	2.9864
	19.8781	5.2495	2.9597		22.6573	5.2863	2.8802		20.2522	5.2296	3.3022
	19.9131	5.249	2.8425		22.6993	5.2815	2.9055		20.2892	5.2423	2.8763
	19.9471	5.2421	2.9032		22.7363	5.2858	2.8671		20.3272	5.2399	3.1622
	19.9811	5.2441	2.682		22.7813	5.2935	2.9696		20.3632	5.232	3.3552
	20.0151	5.2513	2.7972		22.8243	5.283	3.1177		20.4182	5.2321	3.315
	20.0491	5.253	3.0226		22.8703	5.28	3.0496		20.4532	5.2358	2.806
	20.0841	5.2552	2.8099		22.9163	5.2836	2.9557		20.4902	5.2447	2.9648
	20.1191	5.2482	3.1314		22.9593	5.2856	2.978		20.5252	5.2444	2.9799
	20.1542	5.2591	2.8269		22.9953	5.2833	3.2471		20.5602	5.2366	3.0447
	20.1882	5.2577	2.8666		23.0363	5.2797	3.2813		20.5952	5.2406	2.9363
	20.2232	5.2495	3.3475		23.0763	5.2809	2.9872		20.6312	5.2296	3.2065
	20.2572	5.2639	2.5826		23.1173	5.2828	2.8859		20.6652	5.2329	3.0829
	20.2912	5.2589	2.787		23.1543	5.2717	3.3422		20.7002	5.2424	2.6046
	20.3252	5.2663	2.7683		23.1913	5.2743	3.291		20.7352	5.234	2.8814
	20.3592	5.2541	2.698		23.2303	5.2734	3.3243		20.7712	5.2392	2.8903
	20.3932	5.2474	2.9606		23.2713	5.2788	3.0773		20.8062	5.2411	2.69
	20.4272	5.264	3.0009		23.3123	5.2875	2.6497		20.8412	5.2421	2.7186
	20.4622	5.2663	2.7279		23.3523	5.2795	2.9512		20.8762	5.2448	2.9762
	20.4972	5.2595	2.9784		23.3873	5.2816	2.7604		20.9112	5.2392	2.8132
	20.5312	5.2602	3.0063		23.4243	5.2736	2.8659		20.9462	5.2347	3.0663
	20.5672	5.2627	2.9847		23.4633	5.2837	2.7845		20.9802	5.2315	3.227
	20.6022	5.2467	3.4636		23.5033	5.2802	3.0699		21.0152	5.2391	3.1013
	20.6372	5.2555	3.0138		23.5453	5.2798	2.9116		21.0502	5.2263	3.4005
	20.6702	5.2507	3.1607		23.5813	5.2736	3.1142		21.0872	5.2301	3.0894
	20.7052	5.2588	3.0482		23.6213	5.2719	3.1544		21.1242	5.2295	2.9701
	20.7402	5.261	2.894		23.6573	5.2737	3.0936		21.1593	5.2316	2.9842
	20.7752	5.2481	3.0613		23.6983	5.2831	2.6042		21.1953	5.2264	2.9955
	20.8092	5.2547	2.9407		23.7393	5.2769	3.1116		21.2303	5.2295	3.1977
	20.8432	5.2412	3.0099		23.7753	5.2924	2.8221		21.2993	5.2355	3.124
	20.8782	5.2465	3.1836		23.8163	5.2905	2.6202		21.3333	5.2276	3.1926
	20.9132	5.2509	2.8896		23.8523	5.2863	3.3045		21.3703	5.2325	3.0934
	20.9492	5.2436	3.0595		23.8933	5.2895	3.0154		21.4063	5.226	3.1673
	20.9832	5.2502	3.1599		23.9343	5.2911	2.7166		21.4423	5.2374	2.9649
	21.0182	5.2466	3.0476		23.9714	5.2845	3.2651		21.4763	5.2348	3.1013
	21.0522	5.2461	3.2591		24.0124	5.2939	2.8792		21.5113	5.2326	3.1033
	21.0872	5.2477	3.1862		24.0524	5.2965	2.7058		21.5473	5.2428	2.9212
	21.1222	5.2472	3.0925		24.0894	5.2952	3.0603		21.5813	5.2331	2.9667
	21.1562	5.2476	3.2848		24.1304	5.2889	3.2118		21.6163	5.2375	2.636
	21.1912	5.251	3.0786		24.1664	5.2846	3.0699		21.6533	5.2417	2.9681
	21.2252	5.2492	3.5021		24.2064	5.2918	3.0507		21.6893	5.2443	2.891
	21.2602	5.2493	3.1441		24.2474	5.2902	2.9879		21.7253	5.2436	2.95
	21.2942	5.2424	3.3116		24.2874	5.2942	2.7845		21.7603	5.2457	2.7634
	21.3292	5.2358	3.3001		24.3234	5.2953	2.9446		21.7953	5.2439	2.7806
	21.3642	5.2355	3.2036		24.3604	5.283	3.2458		21.8303	5.2463	2.5838
	21.3992	5.2423	3.0565		24.4004	5.2857	2.959		21.8653	5.2449	2.684
	21.4342	5.2375	3.1639		24.4424	5.2869	2.7807		21.9023	5.2563	2.6122
	21.4692	5.2365	3.0736		24.4824	5.2793	3.4556		21.9393	5.2618	2.7243
	21.5042	5.2377	3.1315		24.5184	5.2794	2.8613		21.9733	5.249	3.1903
	21.5382	5.2362	2.9576		24.5554	5.2802	2.8787		22.0083	5.2446	3.0007
	21.5732	5.2347	3.0867		24.5964	5.2803	3.1013		22.0433	5.2468	2.7115
	21.6072	5.2308	3.1503		24.6364	5.2842	3.1052		22.0793	5.2478	2.7738
	21.6422	5.242	3.1456		24.6774	5.2793	3.1615		22.1133	5.2571	2.6995
	21.6772	5.2418	3.1285		24.7164	5.2805	3.1881		22.1483	5.2428	3.2037
	21.7112	5.233	3.3771		24.7504	5.2826	2.9421		22.1843	5.2551	2.7092
	21.7462	5.2408	2.9569		24.7904	5.2794	3.1512		22.2203	5.2506	2.8939
	21.7802	5.2346	3.3757		24.8304	5.282	3.0603		22.2553	5.248	3.2897
	21.8152	5.2378	3.0434		24.8704	5.2823	3.3813		22.2903	5.2441	3.25
	21.8502	5.2353	3.0116		24.9114	5.2871	2.5746		22.3263	5.2436	3.0325
	21.8853	5.2219	3.4681		24.9464	5.2771	3.1326		22.3613	5.2351	3.1777
	21.9203	5.2309	3.1232		24.9824	5.2765	3.2907		22.3963	5.2351	3.2858
	21.9543	5.2304	3.116		25.0224	5.2718	3.1401		22.4333	5.2375	3.0327
	21.9893	5.2361	2.8783		25.0624	5.2827	3.1286		22.4693	5.24	3.1439
	22.0233	5.2317	2.9978		25.1024	5.2705	2.8289		22.5043	5.2452	3.0955
	22.0573	5.2311	3.0088		25.1384	5.2811	3.0319		22.5393	5.2406	3.3256
	22.0923	5.2285	2.9477		25.1764	5.2829	3.1663		22.5753	5.2364	3.3748
	22.1273	5.2316	3.2369		25.2154	5.2849	2.9962		22.6103	5.2392	3.1111
	22.1623	5.234	2.8353		25.2554	5.273	2.8809		22.6463	5.2401	2.8631
	22.1973	5.2197	3.3112		25.2964	5.2621	3.5535		22.6813	5.2395	3.0451
	22.2323	5.2442	2.6361		25.3334	5.2722	3.0684		22.7163	5.2289	3.2898
	22.2663	5.2364	2.9609		25.3734	5.2681	3.1816		22.7523	5.2326	3.1955
	22.3013	5.2394	2.8213		25.4104	5.2762	3.207		22.7873	5.2339	3.1176
	22.3353	5.231	3.2029		25.4494	5.2645	3.3367		22.8223	5.2402	2.9439
	22.3693	5.2385	2.821		25.4904	5.2708	2.9712		22.8583	5.2432	2.9571
	22.4033	5.2412	2.8294		25.5274	5.2708	3.0163		22.8934	5.2331	2.8876
	22.4363	5.2494	2.3677		25.5674	5.2717	3.1484		22.9284	5.2366	2.9562
	22.4703	5.2396	3.0737		25.6074	5.2753	2.7666		22.9644	5.2278	3.4315
	22.5053	5.2465	2.6214		25.6474	5.2787	2.9925		22.9994	5.2337	2.971
	22.5393	5.2467	2.7767		25.6864	5.28	2.8768		23.0354	5.233	3.3428
	22.5743	5.2385	3.0104		25.7265	5.2617	3.2558		23.0704	5.2214	3.1745
	22.6103	5.2426	2.6407		25.7615	5.271	3.1308		23.1054	5.2333	2.8659
	22.6443	5.2517	2.7071		25.8005	5.2704	2.879		23.1404	5.2253	3.3034
	22.6793	5.2398	2.8672		25.8365	5.2666	3.242		23.1754	5.2232	3.3769
	22.7133	5.2398	3.0861		25.8755	5.2705	3.0981		23.2114	5.2272	3.0661
	22.7483	5.2337	3.313		25.9155	5.2718	2.9316		23.2484	5.2251	2.9099
	22.7833	5.2281	3.1983		25.9505	5.2641	3.1838		23.2834	5.2253	2.9779
	22.8173	5.2363	2.9347		25.9905	5.2768	2.7977		23.3184	5.235	2.8518
	22.8513	5.2284	3.0954		26.0295	5.2558	3.4344		23.3534	5.2268	3.0313
	22.8863	5.2395	2.5319		26.0655	5.2737	2.941		23.3894	5.2342	2.7907
	22.9203	5.2337	2.9632		26.1055	5.2622	3.0571		23.4234	5.2292	3.1034
	22.9553	5.2371	2.8279		26.1425	5.2825	2.8128		23.4584	5.2361	2.8568
	22.9893	5.2278	3.1336		26.1815	5.282	2.7147		23.4934	5.2384	2.8554
	23.0243	5.2245	3.5973		26.2215	5.275	2.8887		23.5294	5.2356	2.8224
	23.0603	5.2255	3.3744		26.2615	5.2692	3.0718		23.5634	5.2267	3.0268
	23.0953	5.2259	3.3126		26.2975	5.2717	2.9965		23.5994	5.2377	2.6833
	23.1303	5.2189	3.5089		26.3335	5.2681	3.1181		23.6354	5.2282	3.0094
	23.1653	5.209	3.5341		26.3735	5.2721	3.119		23.6694	5.2264	3.0584
	23.2003	5.2159	3.4286		26.4125	5.269	2.7426		23.7054	5.2306	2.8359
	23.2343	5.2165	3.1485		26.4525	5.27	3.1561		23.7414	5.2296	3.1884
	23.2683	5.2173	3.1153		26.4885	5.2703	2.9651		23.7764	5.2248	3.092
	23.3023	5.2149	3.0707		26.5245	5.2701	2.9881		23.8114	5.2357	2.7212
	23.3373	5.2175	3.169		26.5635	5.2675	2.9236		23.8474	5.2338	2.8725
	23.3713	5.2208	3.0165		26.6045	5.2739	2.6632		23.8834	5.23	2.9824
	23.4063	5.2178	3.0237		26.6445	5.2767	2.7079		23.9194	5.2325	3.0046
	23.4423	5.2237	2.7892		26.6835	5.2791	2.4453		23.9544	5.2285	3.0151
	23.4773	5.2166	3.074		26.7185	5.2754	2.9392		23.9884	5.2297	3.1024
	23.5123	5.2235	2.8628		26.7575	5.2782	2.9713		24.0234	5.2315	2.7273
	23.5473	5.2258	2.8283		26.7975	5.2656	3.4055		24.0584	5.2292	2.904
	23.5813	5.2273	2.79		26.8375	5.262	3.0017		24.0934	5.2364	3.0655
	23.6153	5.2239	3.0658		26.8775	5.2697	3.0756		24.1294	5.2346	2.9574
	23.6504	5.2263	2.7801		26.9145	5.2738	2.7223		24.1654	5.2201	3.0875
	23.6854	5.2242	2.9651		26.9505	5.2732	2.8356		24.2014	5.2264	2.9988
	23.7194	5.2197	3.231		26.9895	5.273	3.0109		24.2384	5.233	3.0845
	23.7534	5.214	3.1399		27.0285	5.2719	2.9721		24.2744	5.2343	3.0683
	23.7874	5.219	2.9897		27.0675	5.2704	3.0173		24.3104	5.2304	2.871
	23.8224	5.2141	3.3262		27.1055	5.2706	3.086		24.3464	5.2273	3.148
	23.8574	5.2122	3.115		27.1415	5.2779	2.8253		24.3824	5.2337	3.1396
	23.8924	5.2123	2.9326		27.1805	5.2807	2.7271		24.4174	5.2283	3.0634
	23.9274	5.2259	2.6262		27.2205	5.2706	3.4254		24.4534	5.2368	2.9996
	23.9624	5.2206	2.9218		27.2605	5.2725	3.1736		24.4874	5.2422	2.7311
	23.9964	5.2259	2.733		27.2965	5.2678	2.9257		24.5224	5.2288	3.1401
	24.0314	5.237	2.5587		27.3365	5.2659	3.1949		24.5584	5.2366	3.0479
	24.0664	5.2225	2.9286		27.3725	5.2824	2.9766		24.5954	5.2299	3.1497
	24.1004	5.2277	3.0075		27.4125	5.2683	3.376		24.6304	5.2302	3.1674
	24.1354	5.2375	2.8059		27.4525	5.2697	3.1823		24.6665	5.2318	2.9297
	24.1694	5.2299	2.903		27.4886	5.2731	3.2465		24.7005	5.2348	2.8798
	24.2044	5.2323	2.8624		27.5286	5.2698	3.3402		24.7365	5.2317	3.1036
	24.2384	5.2376	2.909		27.5696	5.2681	2.8275		24.7715	5.2364	2.8306
	24.2734	5.2293	2.8719		27.6056	5.2623	3.0661		24.8075	5.2273	3.1816
	24.3074	5.2249	3.0597		27.6476	5.274	2.88		24.8425	5.2338	3.0035
	24.3424	5.2298	3.0016		27.6836	5.2674	3.0282		24.8785	5.2236	3.3556
	24.3774	5.2249	2.9861		27.7246	5.2656	2.9451		24.9145	5.2196	3.1867
	24.4114	5.2221	3.0247		27.7656	5.2716	3.0357		24.9505	5.2259	2.928
	24.4454	5.2302	2.8993		27.8016	5.2751	2.935		24.9855	5.2306	2.9352
	24.4804	5.2314	2.6421		27.8426	5.2707	2.9073		25.0215	5.2236	2.9764
	24.5144	5.2298	2.6872		27.8836	5.2665	3.4024		25.0565	5.2305	2.929
	24.5484	5.2438	2.3334		27.9206	5.2643	3.023		25.0905	5.2178	3.2606
	24.5834	5.2379	2.8324		27.9596	5.2689	2.9288		25.1275	5.2135	3.3495
	24.6174	5.2359	3.0361		28.0006	5.266	3.1285		25.1625	5.2183	3.1616
	24.6514	5.226	3.2719		28.0356	5.2608	2.9893		25.1985	5.2222	2.8594
	24.6864	5.2349	3.0027		28.0756	5.265	2.9595		25.2335	5.2305	2.8229
	24.7204	5.2365	2.7794		28.1126	5.2692	2.9964		25.2695	5.2246	3.0933
	24.7554	5.2325	3.1203		28.1516	5.2678	2.8549		25.3045	5.2226	3.0555
	24.7904	5.2348	3.0734		28.1906	5.2719	3.0653		25.3395	5.2222	2.9564
	24.8244	5.2312	3.1695		28.2306	5.2773	2.728		25.3745	5.2291	2.7939
	24.8594	5.241	2.7082		28.2676	5.2775	2.965		25.4105	5.2295	3.1598
	24.8944	5.2365	2.8642		28.3036	5.2744	3.0006		25.4465	5.2238	2.951
	24.9284	5.2351	2.8971		28.3436	5.2687	3.0557		25.4815	5.2275	2.88
	24.9634	5.2365	2.9083		28.3856	5.2742	2.5183		25.5165	5.2317	3.0562
	24.9974	5.239	2.922		28.4256	5.2757	2.9003		25.5515	5.2335	2.7758
	25.0314	5.2403	3.1125		28.4616	5.2717	2.802		25.5875	5.2352	2.8268
	25.0664	5.2266	3.3396		28.4986	5.2636	3.0523		25.6215	5.2202	3.2579
	25.1014	5.2337	3.0659		28.5386	5.2644	3.0684		25.6565	5.2122	3.4315
	25.1354	5.232	3.2992		28.5786	5.2594	3.3923		25.6925	5.2235	2.8728
	25.1694	5.2342	2.9609		28.6186	5.2641	2.7497		25.7295	5.2214	2.9189
	25.2044	5.2351	2.8886		28.6596	5.2601	3.3182		25.7635	5.2286	2.7457
	25.2394	5.233	3.0062		28.6936	5.2603	3.1059		25.7995	5.2315	2.9058
	25.2734	5.2384	3.1668		28.7336	5.2685	2.8257		25.8355	5.2271	2.8974
	25.3084	5.234	2.8393		28.7736	5.2755	2.6284		25.8715	5.2329	2.8198
	25.3424	5.233	2.9888		28.8146	5.2731	2.9177		25.9075	5.2336	2.932
	25.3765	5.2314	2.8324		28.8536	5.2699	2.8853		25.9435	5.2221	3.1121
	25.4105	5.2434	2.8166		28.8896	5.2703	2.933		25.9795	5.2288	2.9059
	25.4455	5.2352	3.1665		28.9256	5.271	3.2121		26.0135	5.2194	3.1367
	25.4795	5.2302	3.1103		28.9656	5.2881	2.7557		26.0495	5.2268	2.989
	25.5145	5.2376	2.9653		29.0056	5.27	2.7998		26.0855	5.2265	3.0622
	25.5485	5.2299	3.139		29.0456	5.2744	2.8419		26.1205	5.2273	3.1115
	25.5835	5.2381	3.245		29.0816	5.2814	3.0003		26.1545	5.2305	2.9842
	25.6175	5.2368	3.182		29.1186	5.277	3.1836		26.1915	5.231	2.9109
	25.6535	5.2337	3.2417		29.1586	5.2679	3.0966		26.2275	5.2395	2.8461
	25.6875	5.2361	3.2236		29.1986	5.2623	3.1704		26.2625	5.2259	3.1664
	25.7225	5.2268	3.2777		29.2387	5.2769	3.011		26.2975	5.239	2.7084
	25.7575	5.2293	2.8878		29.2747	5.2708	2.8459		26.3335	5.229	3.1077
	25.7925	5.2209	3.1406		29.3157	5.2736	2.851		26.3695	5.2366	2.8816
	25.8265	5.2187	3.2134		29.3507	5.2709	3.1148		26.4036	5.2386	2.9944
	25.8615	5.2271	2.7207		29.3917	5.2728	3.2695		26.4406	5.23	3.0774
	25.8955	5.2288	2.8304		29.4307	5.2735	2.674		26.4766	5.2289	2.7212
	25.9305	5.2311	2.8198		29.4677	5.2794	2.8788		26.5116	5.234	2.9708
	25.9655	5.2218	3.1394		29.5067	5.2804	2.8938		26.5466	5.2425	2.7887
	25.9995	5.224	2.8173		29.5467	5.2733	3.0801		26.5816	5.2412	2.8584
	26.0345	5.2406	2.627		29.5837	5.2778	3.0457		26.6166	5.2457	2.921
	26.0695	5.2414	2.4298		29.6237	5.2663	3.2757		26.6526	5.2433	2.8255
	26.1045	5.2455	2.8897		29.6597	5.2585	3.3784		26.6866	5.2506	2.7926
	26.1395	5.2348	2.9458		29.7007	5.2732	3.0265		26.7236	5.2334	3.2617
	26.1745	5.2403	3.0371		29.7407	5.2734	2.6911		26.7596	5.2308	3.1048
	26.2085	5.2387	2.9514		29.7757	5.2706	3.166		26.7956	5.2343	2.8592
	26.2435	5.2348	3.1493		29.8157	5.2639	3.3569		26.8306	5.2384	3.0034
	26.2775	5.23	3.1655		29.8517	5.2651	2.9255		26.8656	5.2473	2.8404
	26.3115	5.2403	2.8868		29.8917	5.2614	3.0098		26.9006	5.2306	3.1512
	26.3455	5.2329	2.757		29.9327	5.2654	3.2338		26.9346	5.2423	2.461
	26.3795	5.2378	2.8392		29.9717	5.2645	3.1376		26.9696	5.2325	3.0259
	26.4145	5.2463	2.523		30.0087	5.2583	3.1011		27.0066	5.2346	2.923
	26.4485	5.2406	2.905		30.0437	5.2685	2.9528		27.0416	5.24	3.0514
	26.4835	5.2366	3.2178		30.0837	5.2596	3.0529		27.0776	5.2386	3.0499
	26.5195	5.234	3.0723		30.1237	5.2653	2.9557		27.1116	5.2324	2.9746
	26.5535	5.2379	3.0891		30.1647	5.26	2.8357		27.1476	5.2454	2.8183
	26.5885	5.2315	3.137		30.2007	5.2593	3.3542		27.1816	5.2315	2.9516
	26.6235	5.2357	3.3123		30.2397	5.2632	3.1276		27.2176	5.2309	3.167
	26.6575	5.2378	3.0696		30.2757	5.2552	3.1627		27.2526	5.2333	3.0265
	26.6925	5.2335	3.2772		30.3157	5.2548	3.2092		27.2886	5.2321	3.1121
	26.7275	5.2311	3.1111		30.3567	5.2566	3.2237		27.3246	5.2299	3.1085
	26.7615	5.231	3.0109		30.3977	5.2586	2.9901		27.3606	5.2286	3.1544
	26.7965	5.2323	2.9394		30.4347	5.2543	3.2011		27.3956	5.2333	2.9722
	26.8315	5.2287	3.1955		30.4707	5.2571	2.9818		27.4316	5.222	3.4807
	26.8655	5.2414	2.6306		30.5117	5.2642	2.9645		27.4666	5.2205	3.4563
	26.9005	5.2236	3.3606		30.5517	5.2698	2.5902		27.5016	5.2326	3.1191
	26.9355	5.2421	2.7115		30.5907	5.2607	3.0902		27.5386	5.2265	3.4641
	26.9705	5.238	2.5345		30.6327	5.2597	3.2271		27.5736	5.224	3.2201
	27.0055	5.2331	3.2202		30.6677	5.2562	3.1959		27.6086	5.226	3.0384
	27.0395	5.2368	2.9822		30.7077	5.2434	3.2429		27.6446	5.2265	3.1465
	27.0745	5.23	3.2423		30.7517	5.2544	3.5527		27.6786	5.2201	3.2252
	27.1085	5.2405	3.0785		30.7917	5.2544	2.9707		27.7136	5.2233	2.9881
	27.1436	5.2397	3.0687		30.8317	5.2489	3.3082		27.7496	5.2268	3.1781
	27.1776	5.2303	3.5297		30.8667	5.2436	2.8496		27.7836	5.2314	3.0041
	27.2116	5.2365	2.9834		30.9067	5.2419	3.1296		27.8196	5.2259	3.0166
	27.2466	5.232	3.062		30.9467	5.2475	3.2398		27.8556	5.2266	3.0547
	27.2806	5.2387	2.7439		30.9958	5.2458	3.2921		27.8916	5.2234	3.0361
	27.3146	5.2337	2.7356		31.0358	5.2498	2.7681		27.9256	5.2275	3.2431
	27.3496	5.2297	3.0514		31.0728	5.2541	3.0815		27.9606	5.2348	3.1808
	27.3846	5.236	3.1108		31.1088	5.2531	3.3256		27.9956	5.2243	3.1993
	27.4186	5.2358	3.1185		31.1498	5.254	3.0958		28.0306	5.2305	3.0545
	27.4536	5.2344	3.2016		31.1888	5.2393	2.9263		28.0666	5.2324	2.7302
	27.4866	5.2309	3.2919		31.2318	5.2532	2.7189		28.1016	5.2299	3.1148
	27.5216	5.2281	3.2362		31.2688	5.2611	2.6691		28.1366	5.2294	2.9776
	27.5556	5.2323	3.1506		31.3088	5.249	2.7594		28.1727	5.2268	2.8547
	27.5896	5.2288	2.9736		31.3458	5.258	2.8647		28.2067	5.2303	2.8923
	27.6246	5.2328	2.7785		31.3888	5.2549	3.0393		28.2417	5.2253	2.8988
	27.6586	5.2309	2.8793		31.4308	5.2613	2.8279		28.2767	5.2214	2.8859
	27.6936	5.2325	3.0757		31.4668	5.2588	2.7967		28.3117	5.2176	3.1945
	27.7286	5.2371	2.7086		31.5078	5.2581	2.8105		28.3467	5.2229	2.8307
	27.7646	5.2248	3.1279		31.5448	5.26	2.8388		28.3817	5.2298	2.6273
	27.7996	5.2301	2.7551		31.5848	5.2737	2.7913		28.4177	5.2322	2.8124
	27.8346	5.2216	3.1935		31.6258	5.2608	2.8781		28.4527	5.235	2.7198
	27.8696	5.2324	2.8807		31.6628	5.2711	2.7721		28.4887	5.2309	2.803
	27.9036	5.233	2.8975		31.7028	5.2683	2.8977		28.5237	5.2328	2.7501
	27.9376	5.2351	3.0152		31.7438	5.2654	2.8346		28.5587	5.235	2.8283
	27.9726	5.228	3.1905		31.7808	5.2624	3.2022		28.5937	5.2215	3.058
	28.0076	5.2338	3.0634		31.8228	5.2711	2.6302		28.6287	5.2296	3.0999
	28.0426	5.239	2.915		31.8598	5.2768	2.5985		28.6647	5.241	2.6694
	28.0776	5.2449	2.9784		31.8998	5.2744	2.7941		28.6987	5.2265	3.1053
	28.1136	5.2315	3.0723		31.9408	5.2775	2.7762		28.7347	5.2264	3.4275
	28.1486	5.2287	3.1435		31.9818	5.2761	2.8947		28.7707	5.2184	3.3423
	28.1836	5.2363	3.0052		32.0178	5.2742	2.9283		28.8057	5.2196	3.1936
	28.2186	5.243	2.8838		32.0538	5.2766	2.9075		28.8407	5.2185	3.399
	28.2526	5.2366	3.0675		32.0938	5.2609	2.9057		28.8767	5.225	3.0878
	28.2876	5.2363	3.1705		32.1338	5.2752	2.8695		28.9117	5.2261	3.0169
	28.3226	5.2336	3.0065		32.1748	5.2714	2.7574		28.9457	5.2207	3.4206
	28.3576	5.2318	3.1917		32.2108	5.2786	2.8399		28.9807	5.2253	2.8118
	28.3926	5.232	3.0507		32.2458	5.2755	3.0641		29.0167	5.2228	3.0497
	28.4266	5.2314	2.9519		32.2858	5.274	2.9141		29.0527	5.2159	3.228
	28.4616	5.2243	3.0491		32.3248	5.2571	3.2709		29.0877	5.2241	3.0921
	28.4966	5.2214	3.2081		32.3648	5.2674	3.0599		29.1227	5.2146	3.4563
	28.5316	5.2371	2.7259		32.4058	5.2628	3.0632		29.1587	5.219	3.127
	28.5666	5.2336	3.0446		32.4408	5.271	2.9687		29.1937	5.2131	3.024
	28.6006	5.2303	2.8092		32.4818	5.2693	3.2433		29.2287	5.2232	2.9682
	28.6356	5.2334	2.9572		32.5228	5.2699	2.8811		29.2627	5.2218	2.8793
	28.6696	5.223	3.1053		32.5618	5.2804	2.7989		29.2977	5.2166	3.1409
	28.7046	5.2305	2.9996		32.6018	5.2729	3.0271		29.3347	5.2232	2.7913
	28.7396	5.2231	3.0826		32.6418	5.2784	2.5139		29.3697	5.22	3.0171
	28.7746	5.2288	2.7594		32.6758	5.2753	3.0277		29.4047	5.2266	2.7637
	28.8096	5.2291	3.0907		32.7159	5.2826	2.9878		29.4397	5.2333	2.7704
	28.8436	5.2313	3.1739		32.7559	5.2714	2.9477		29.4757	5.2273	2.8888
	28.8787	5.2242	3.1876		32.7959	5.2755	2.7356		29.5097	5.2143	3.3523
	28.9137	5.2362	2.8696		32.8359	5.2812	2.9593		29.5447	5.2273	2.9357
	28.9487	5.2267	3.0863		32.8699	5.2842	2.6727		29.5807	5.2371	2.7106
	28.9837	5.2311	2.7945		32.9119	5.2652	3.2629		29.6157	5.2428	2.47
	29.0177	5.2312	3.048		32.9529	5.2746	3.2725		29.6517	5.2323	2.7641
	29.0517	5.225	3.0294		32.9939	5.2675	3.0606		29.6877	5.2225	3.1903
	29.0867	5.2347	2.7412		33.0349	5.2795	2.7511		29.7227	5.2284	2.9228
	29.1207	5.2161	3.3907		33.0729	5.2718	2.9946		29.7567	5.232	3.135
	29.1547	5.2123	3.3788		33.1109	5.2636	3.2715		29.7927	5.2225	3.1644
	29.1897	5.2146	3.2193		33.1509	5.2587	3.3636		29.8277	5.2313	2.973
	29.2237	5.2246	2.9769		33.1919	5.2575	3.2206		29.8627	5.2344	2.8779
	29.2577	5.2248	3.278		33.2319	5.2704	2.921		29.8988	5.2243	3.1491
	29.2927	5.2353	2.8819		33.2689	5.2691	2.9756		29.9348	5.2202	3.291
	29.3267	5.214	3.2102		33.3109	5.2662	3.1414		29.9688	5.2163	3.1963
	29.3617	5.2162	3.2915		33.3479	5.2609	3.0551		30.0038	5.2234	3.0397
	29.3967	5.2252	3.0554		33.3879	5.2652	3.134		30.0388	5.232	2.7735
	29.4307	5.2315	2.6983		33.4289	5.2616	2.9343		30.0748	5.226	2.7744
	29.4657	5.2317	2.5238		33.4669	5.264	3.1487		30.1088	5.2305	2.8193
	29.4997	5.2348	2.4652		33.5079	5.2607	3.2858		30.1448	5.2163	3.1496
	29.5337	5.2209	2.7871		33.5449	5.2627	2.9438		30.1798	5.2185	2.9969
	29.5677	5.2316	2.7838		33.5839	5.2576	3.0059		30.2148	5.2207	3.1295
	29.6017	5.2375	2.8156		33.6249	5.2685	2.9501		30.2508	5.2186	2.8655
	29.6367	5.2432	2.8278		33.6619	5.2613	3.1139		30.2858	5.2261	2.8452
	29.6707	5.2339	2.9329		33.7029	5.253	3.2031		30.3208	5.2195	2.8899
	29.7047	5.2325	3.2231		33.7429	5.2539	3.5542		30.3568	5.2279	2.7154
	29.7397	5.2352	3.0672		33.7809	5.2624	2.8882		30.3918	5.2271	2.9177
	29.7747	5.234	3.0731		33.8209	5.2637	2.8819		30.4278	5.2264	2.6707
	29.8097	5.2364	2.8083		33.8569	5.2641	3.0289		30.4648	5.2247	3.0507
	29.8447	5.2427	2.7716		33.8969	5.2592	3.2014		30.5008	5.2253	3.0009
	29.8797	5.2495	2.452		33.9369	5.263	2.9651		30.5348	5.2363	2.5343
	29.9147	5.2405	2.7227		33.9769	5.2624	3.2105		30.5708	5.2332	2.9985
	29.9487	5.2445	2.7215		34.0129	5.2477	3.4169		30.6068	5.2263	3.0488
	29.9827	5.2486	2.6386		34.0489	5.2604	3.1982		30.6408	5.2306	3.0122
	30.0177	5.2431	2.827		34.0889	5.2592	2.7098		30.6758	5.2285	2.8275
	30.0527	5.2546	2.4921		34.1289	5.2462	3.1877		30.7108	5.2288	3.1529
	30.0867	5.2502	2.572		34.1699	5.2658	2.9606		30.7458	5.2196	3.0919
	30.1207	5.2481	2.7442		34.2059	5.2583	2.7126		30.7818	5.2298	2.8323
	30.1547	5.258	2.8491		34.2419	5.2572	2.9793		30.8168	5.2246	3.0501
	30.1897	5.2473	3.1316		34.2819	5.2649	2.6346		30.8518	5.2243	3.2288
	30.2247	5.249	2.8144		34.3229	5.2754	2.8181		30.8868	5.2303	3.1627
	30.2597	5.2537	2.8078		34.3629	5.271	2.696		30.9228	5.2257	3.0869
	30.2947	5.2454	3.1466		34.4029	5.2724	2.9547		30.9578	5.2255	3.0533
	30.3297	5.2458	3.0499		34.4379	5.2634	2.8068		30.9938	5.2237	2.9373
	30.3647	5.2506	3.0964		34.477	5.2691	2.9002		31.0298	5.2218	3.1565
	30.3997	5.2364	3.3093		34.519	5.2671	2.8045		31.0658	5.2285	2.8404
	30.4347	5.2376	3.3214		34.558	5.2557	3.2753		31.1008	5.225	3.0253
	30.4687	5.2451	3.1033		34.599	5.265	2.8339		31.1358	5.214	3.3044
	30.5027	5.2418	3.0457		34.634	5.2601	3.1723		31.1708	5.2195	3.2824
	30.6448	5.237	3.4369		34.67	5.2765	2.9013		31.2058	5.2197	3.1453
	30.6798	5.2431	3.0521		34.71	5.2736	3.1105		31.2408	5.2183	3.0998
	30.7138	5.2393	2.9577		34.751	5.2723	2.612		31.2758	5.2084	3.399
	30.7488	5.2455	2.9456		34.792	5.2747	2.824		31.3118	5.2061	3.5731
	30.7838	5.2391	3.091		34.828	5.277	2.5455		31.3478	5.2041	3.2438
	30.8188	5.2524	2.5119		34.864	5.2738	3.0397		31.3828	5.2103	3.1077
	30.8538	5.2532	2.7434		34.905	5.2768	2.7622		31.4188	5.213	3.0083
	30.8888	5.2538	2.5798		34.945	5.2609	3.4517		31.4538	5.2196	2.84
	30.9238	5.2505	2.8572		34.984	5.2728	3.0629		31.4878	5.2113	3.1208
	30.9588	5.2435	2.9905		35.019	5.2732	2.6215		31.5238	5.2211	2.6685
	30.9948	5.243	2.9772		35.054	5.2741	2.6985		31.5578	5.2243	3.0928
	31.0288	5.2361	3.2386		35.09	5.2693	3.2596		31.5938	5.2152	2.9334
	31.0628	5.2484	2.8929		35.13	5.2704	3.0094		31.6298	5.214	3.12
	31.0978	5.2524	2.8575		35.171	5.2787	3.1051		31.6649	5.2154	2.889
	31.1328	5.246	3.0418		35.211	5.2814	2.8215		31.6999	5.2055	3.1527
	31.1668	5.2432	3.1671		35.248	5.2693	3.3775		31.7359	5.2137	2.9225
	31.2008	5.2365	3.3218		35.289	5.2611	3.3833		31.7709	5.2187	2.9981
	31.2348	5.2408	3.0683		35.325	5.276	3.0181		31.8059	5.2144	3.0592
	31.2698	5.2367	2.9031		35.368	5.2717	2.9402		31.8409	5.2166	2.9166
	31.3038	5.2356	3.3742		35.41	5.2655	3.5598		31.8779	5.2197	2.6457
	31.3378	5.2303	3.2037		35.447	5.2677	3.1919		31.9139	5.2168	2.9512
	31.3728	5.2463	2.9536		35.488	5.2718	2.8149		31.9489	5.2176	2.7671
	31.4078	5.2262	3.3058		35.524	5.2598	3.3393		31.9849	5.2219	2.8938
	31.4428	5.2272	3.1035		35.566	5.2642	3.0353		32.0189	5.2257	3.0066
	31.4778	5.2301	3.1429		35.607	5.2568	3.5508		32.0539	5.2246	2.8422
	31.5128	5.233	2.9987		35.644	5.2627	3.0046		32.0889	5.2258	2.8894
	31.5468	5.2347	2.8352		35.685	5.2554	3.2472		32.1239	5.2332	2.4101
	31.5818	5.2332	2.8518		35.725	5.2668	3.1705		32.1599	5.2352	2.721
	31.6168	5.2391	3.034		35.761	5.2619	2.9742		32.1959	5.2412	2.6228
	31.6518	5.2336	3.0219		35.803	5.2635	2.7687		32.2309	5.243	2.6155
	31.6868	5.2313	3.0529		35.84	5.2567	3.2211		32.2659	5.2334	3.1231
	31.7218	5.2385	3.1699		35.881	5.2511	3.1856		32.3009	5.236	2.8436
	31.7568	5.2352	3.0655		35.922	5.2475	2.9202		32.3359	5.2284	3.1868
	31.7918	5.2449	2.8785		35.962	5.2575	3.0669		32.3719	5.2195	3.7183
	31.8268	5.237	3.2018		35.999	5.2479	3.0028		32.4059	5.2217	3.1488
	31.8618	5.2399	3.1247		36.035	5.2682	2.5947		32.4419	5.227	3.2633
	31.8958	5.2389	3.056		36.075	5.262	2.886		32.4769	5.2267	3.0501
	31.9308	5.2401	3.0935		36.117	5.2622	3.0414		32.5129	5.2263	3.112
	31.9658	5.2345	3.0136		36.157	5.2688	2.7026		32.5479	5.2138	3.2233
	32.0008	5.2409	2.9574		36.194	5.2665	3.0644		32.5839	5.2232	3.0996
	32.0358	5.2411	2.7388		36.2301	5.2723	2.9357		32.6179	5.2215	3.0434
	32.0698	5.2444	2.9537		36.2701	5.2589	3.3977		32.6529	5.2249	3.1325
	32.1048	5.246	3.0088		36.3101	5.2544	3.1844		32.6879	5.2246	3.1705
	32.1398	5.2512	2.5878		36.3501	5.2619	3.1147		32.7229	5.2257	3.0161
	32.1748	5.2519	2.7518		36.3901	5.2601	2.8345		32.7589	5.2207	3.1855
	32.2098	5.2516	2.9419		36.4231	5.2668	2.4751		32.7949	5.2264	3.0917
	32.2448	5.2454	2.8674		36.4631	5.2645	2.6226		32.8309	5.2281	2.7919
	32.2788	5.2542	2.649		36.5031	5.2714	2.8377		32.8649	5.2159	3.359
	32.3128	5.249	2.7806		36.5441	5.2537	2.9755		32.9009	5.2211	2.9904
	32.3468	5.25	2.9783		36.5851	5.2599	3.1118		32.9359	5.221	3.3163
	32.3819	5.2511	2.8379		36.6201	5.2578	3.1593		32.9709	5.2176	2.8726
	32.4159	5.2407	3.2892		36.6561	5.2646	2.9576		33.0059	5.2203	3.0069
	32.4509	5.2457	3.2512		36.6961	5.2482	3.1977		33.0409	5.2148	3.1091
	32.4849	5.2445	3.0192		36.7351	5.2636	3.0351		33.0769	5.2168	3.0532
	32.5199	5.238	3.107		36.7751	5.2659	2.9441		33.1119	5.2124	3.0578
	32.5549	5.2317	3.2241		36.8121	5.2643	2.7589		33.1469	5.2217	2.9054
	32.5899	5.2352	3.0542		36.8491	5.2644	3.0135		33.1819	5.2107	3.2322
	32.6249	5.2383	3.2194		36.8891	5.26	2.9386		33.2179	5.218	2.989
	32.6589	5.231	3.1415		36.9291	5.2628	2.8933		33.2529	5.2102	3.148
	32.6939	5.2284	3.3186		36.9681	5.2608	2.9222		33.2879	5.2274	2.6993
	32.7279	5.2386	3.0171		37.0041	5.2601	3.0034		33.3229	5.2295	2.3323
	32.7619	5.2368	2.7846		37.0441	5.2716	3.0079		33.3589	5.2288	2.8978
	32.7969	5.2299	3.1802		37.0801	5.2603	3.0293		33.394	5.229	2.6143
	32.8309	5.2266	3.0956		37.1201	5.2604	2.7372		33.43	5.2236	2.8831
	32.8659	5.2326	3.1487		37.1611	5.2615	2.828		33.465	5.2297	2.7146
	32.9009	5.2389	2.8304		37.1971	5.2623	2.9084		33.499	5.2249	2.9411
	32.9359	5.2361	3.0682		37.2361	5.2542	3.3216		33.535	5.2195	3.1065
	32.9709	5.2352	2.9176		37.2761	5.2643	2.7618		33.569	5.2359	2.7878
	33.0049	5.2346	3.2162		37.3131	5.2602	3.2501		33.604	5.2346	3.1652
	33.0399	5.2247	3.347		37.3511	5.2575	3.3563		33.64	5.2281	2.973
	33.0739	5.2153	3.5385		37.3911	5.2562	3.0738		33.676	5.227	2.9049
	33.1089	5.2367	2.9702		37.4271	5.2476	3.2102		33.711	5.2298	2.8523
	33.1429	5.2305	3.1798		37.4671	5.265	2.7992		33.746	5.2256	3.1749
	33.1769	5.2262	3.0037		37.5031	5.2582	3.2395		33.781	5.2314	2.879
	33.2109	5.2196	3.2837		37.5441	5.2478	3.2585		33.817	5.2299	3.0293
	33.2459	5.2189	3.164		37.5841	5.2435	3.2621		33.851	5.2341	2.9711
	33.2799	5.2255	2.9205		37.6201	5.2541	3.3649		33.887	5.2215	3.2456
	33.3149	5.2194	3.1776		37.6611	5.2452	3.5754		33.923	5.2412	2.5988
	33.3499	5.2178	3.4066		37.7001	5.2402	3.2701		33.959	5.2353	2.8644
	33.3839	5.2217	3.1144		37.7361	5.2412	3.5568		33.994	5.2365	3.1202
	33.4189	5.2232	3.1606		37.7761	5.2301	3.7676		34.03	5.2339	3.0216
	33.4539	5.2206	3.1436		37.8151	5.2342	3.4838		34.065	5.2366	2.9157
	33.4879	5.2241	3.1944		37.8571	5.2378	3.3258		34.1	5.2273	3.2654
	33.5229	5.2219	2.9257		37.8981	5.232	3.5012		34.134	5.2292	3.1983
	33.5569	5.2218	3.1443		37.9381	5.2287	3.5091		34.17	5.2281	3.0851
	33.5899	5.2193	3.0362		37.9772	5.2325	3.4226		34.206	5.2224	3.0372
	33.6249	5.2162	3.0384		38.0132	5.2183	3.1611		34.242	5.2355	2.7116
	33.6589	5.2251	2.6265		38.0552	5.2376	2.5349		34.277	5.2273	3.0311
	33.6919	5.2203	2.9443		38.0962	5.2272	3.4022		34.312	5.2235	3.4114
	33.7259	5.2239	2.86		38.1372	5.2248	3.0521		34.347	5.2258	3.0624
	33.7609	5.2232	2.8599		38.1742	5.2291	2.9936		34.382	5.2222	3.1359
	33.7959	5.228	2.9013		38.2112	5.2221	3.3212		34.417	5.2182	3.3121
	33.8309	5.2341	3.107		38.2522	5.2231	2.9074		34.452	5.2269	2.8646
	33.8649	5.2335	2.9318		38.2932	5.2414	2.8132		34.488	5.2336	2.8624
	33.8989	5.2216	3.2084		38.3342	5.231	2.6595		34.522	5.233	2.7828
	33.9349	5.2353	2.9448		38.3762	5.2432	2.5623		34.558	5.2266	3.1422
	33.9699	5.2233	2.9893		38.4112	5.242	2.6242		34.592	5.2285	2.8077
	34.0049	5.2309	3.1769		38.4512	5.2296	3.1906		34.627	5.2148	3.0813
	34.0389	5.2283	2.9827		38.4922	5.2368	2.7071		34.662	5.2353	2.7116
	34.0729	5.2289	3.0059		38.5332	5.2497	2.6021		34.697	5.2452	2.4555
	34.1079	5.2279	2.8967		38.5752	5.2429	2.6776		34.732	5.228	3.007
	34.143	5.2335	2.6086		38.6132	5.2449	2.791		34.768	5.2271	2.9596
	34.177	5.2285	2.9474		38.6502	5.2539	2.6703		34.803	5.2319	2.7291
	34.211	5.2345	2.7228		38.6902	5.2609	2.4297		34.839	5.2348	2.9961
	34.246	5.2273	3.0432		38.7312	5.265	2.6684		34.874	5.2338	2.9852
	34.28	5.2315	3.0643		38.7722	5.2676	2.5467		34.909	5.2286	2.9338
	34.316	5.2314	2.9272		38.8092	5.2503	3.0122		34.945	5.2318	3.0326
	34.351	5.2234	3.0918		38.8452	5.2559	2.7295		34.979	5.224	3.0334
	34.385	5.2207	3.3634		38.8862	5.2772	2.4723		35.014	5.227	3.098
	34.42	5.2142	3.4818		38.9272	5.2608	2.7665		35.05	5.2215	3.1773
	34.455	5.217	3.3024		38.9682	5.2697	2.8082		35.085	5.2285	2.9622
	34.49	5.2193	3.0905		39.0052	5.2706	2.4205		35.12	5.2277	3.1418
	34.524	5.2196	3.0257		39.0462	5.2707	2.5284		35.1561	5.2204	3.2108
	34.558	5.2144	3.0908		39.0822	5.2738	2.9426		35.1911	5.2275	2.8421
	34.592	5.2169	2.9876		39.1242	5.2683	2.9593		35.2261	5.2165	3.5544
	34.627	5.2194	3.0548		39.1652	5.2667	2.8591		35.2611	5.2172	3.1377
	34.661	5.2102	3.1053		39.2022	5.2671	3.0896		35.2961	5.2122	3.5026
	34.696	5.226	2.692		39.2422	5.2571	3.2672		35.3311	5.2205	2.9759
	34.731	5.2297	2.932		39.2832	5.2629	2.853		35.3651	5.2122	3.2074
	34.766	5.2304	2.7748		39.3202	5.2543	3.6102		35.4031	5.2147	3.1518
	34.802	5.2192	3.0611		39.3622	5.2696	2.7768		35.4381	5.2014	3.5224
	34.836	5.2273	2.9797		39.3992	5.2625	3.3338		35.4731	5.2059	3.5596
	34.871	5.2284	2.8499		39.4412	5.2755	2.9731		35.5081	5.2085	2.8928
	34.905	5.2237	3.1003		39.4822	5.2723	2.8232		35.5431	5.2109	3.0227
	34.94	5.2283	2.8883		39.5202	5.2665	3.2531		35.5781	5.2157	2.7893
	34.974	5.229	2.879		39.5612	5.2706	3.3262		35.6131	5.2096	2.9326
	35.008	5.242	2.8551		39.6022	5.258	3.1197		35.6481	5.2143	2.8177
	35.043	5.2341	2.7956		39.6382	5.2604	3.3122		35.6841	5.2167	2.653
	35.078	5.2377	2.7468		39.6792	5.2672	3.2313		35.7201	5.2076	3.2786
	35.112	5.2319	2.9231		39.7193	5.261	3.1142		35.7551	5.2189	2.6706
	35.147	5.2256	3.05		39.7563	5.265	3.1288		35.7901	5.2086	3.0891
	35.182	5.2281	3.0298		39.7973	5.2509	3.2596		35.8251	5.2107	3.2083
	35.217	5.238	2.8669		39.8333	5.2542	3.1977		35.8601	5.2065	3.0044
	35.252	5.2386	2.6138		39.8733	5.2547	2.9431		35.8961	5.2196	2.966
	35.286	5.2289	2.9185		39.9143	5.2465	3.3015		35.9301	5.2112	2.7896
	35.32	5.2443	2.4097		39.9553	5.2608	2.9241		35.9661	5.2128	3.0513
	35.354	5.2427	2.6152		39.9933	5.2484	3.1636		36.0021	5.2184	2.7779
	35.389	5.2351	2.811		40.0293	5.2508	3.0335		36.0371	5.2129	3.0858
	35.423	5.2252	3.1728		40.0703	5.2503	2.98		36.0721	5.2111	3.023
	35.458	5.2455	2.5054		40.1113	5.2458	3.1483		36.1071	5.2139	2.8617
	35.492	5.241	2.6718		40.1513	5.2607	2.9466		36.1421	5.2284	2.3935
	35.527	5.2478	3.0286		40.1893	5.2443	3.1847		36.1771	5.2369	2.5214
	35.562	5.2441	2.8667		40.2253	5.2473	3.1809		36.2121	5.2264	2.8161
	35.597	5.2448	2.9386		40.2663	5.247	3.1652		36.2481	5.2268	2.9329
	35.632	5.246	2.8228		40.3053	5.2485	2.7565		36.2831	5.2349	2.8831
	35.667	5.2454	2.9332		40.3453	5.2548	2.8353		36.3191	5.2334	2.9795
	35.701	5.2293	3.2921		40.3863	5.2714	2.5555		36.3541	5.2257	3.1735
	35.735	5.2432	3.0898		40.4213	5.2627	2.9422		36.3891	5.2223	3.2521
	35.769	5.2447	2.703		40.4623	5.2634	2.7688		36.4241	5.2101	3.4183
	35.804	5.2507	2.5002		40.5013	5.2522	3.3398		36.4591	5.2038	2.9353
	35.839	5.2505	2.8055		40.5423	5.2514	2.8457		36.4941	5.2193	3.0128
	35.8741	5.236	3.2849		40.5823	5.2612	3.1998		36.5291	5.2021	3.4228
	35.9091	5.2391	3.0183		40.6193	5.2647	2.8312		36.5661	5.2152	3.1306
	35.9441	5.2332	3.1035		40.6563	5.2496	2.9982		36.6021	5.2192	2.792
	35.9791	5.2348	3.1805		40.6953	5.2474	3.1634		36.6371	5.2242	2.6856
	36.0141	5.2455	2.8477		40.7363	5.2373	3.5881		36.6721	5.2237	2.915
	36.0481	5.2375	3.0981		40.7773	5.2402	3.0866		36.7071	5.2204	3.0758
	36.0831	5.2428	3.1221		40.8133	5.2449	3.15		36.7421	5.2191	3.0813
	36.1181	5.2406	3.2029		40.8493	5.246	3.1934		36.7771	5.2196	3.1339
	36.1521	5.2385	3.1339		40.8903	5.2408	3.1405		36.8131	5.215	3.1613
	36.1861	5.242	3.1132		40.9313	5.2585	2.6526		36.8491	5.2165	3.2154
	36.2201	5.24	3.1048		40.9813	5.2491	3.0663		36.8842	5.2165	3.0834
	36.2551	5.2433	3.0236		41.0183	5.2506	3.0179		36.9192	5.2145	3.162
	36.2901	5.2361	3.28		41.0603	5.2476	3.0163		36.9542	5.2141	3.1262
	36.3241	5.2373	3.2475		41.0973	5.2434	3.2783		36.9892	5.2074	3.2403
	36.3591	5.2394	3.0752		41.1403	5.2539	3.2315		37.0242	5.2052	3.3712
	36.3941	5.2442	2.8029		41.1823	5.2527	2.5149		37.0592	5.2062	3.1566
	36.4291	5.2494	2.6905		41.2193	5.2496	3.2382		37.0942	5.1963	3.3914
	36.4641	5.244	2.8874		41.2603	5.2546	2.785		37.1302	5.2111	2.8276
	36.4981	5.2515	2.7472		41.3293	5.255	2.821		37.1662	5.2016	3.1843
	36.5331	5.2483	2.6422		41.3663	5.2467	3.0343		37.2012	5.2022	3.0048
	36.5681	5.2421	2.9096		41.4203	5.2337	3.1549		37.2362	5.1984	3.3349
	36.6021	5.2366	3.1203		41.4604	5.2332	3.518		37.2722	5.2074	2.9551
	36.6371	5.2379	3.2413		41.5004	5.2325	3.2769		37.3062	5.212	2.8756
	36.6711	5.2302	3.2026		41.5454	5.2226	3.4886		37.3422	5.2076	2.8921
	36.7051	5.2298	3.3544		41.5824	5.2304	3.1575		37.3772	5.2158	2.5799
	36.7391	5.2289	3.4703		41.6224	5.2239	3.4912		37.4112	5.207	2.9385
	36.7741	5.2365	3.2908		41.6604	5.2213	2.8964		37.4472	5.2113	2.8094
	36.8081	5.2257	3.2743		41.7014	5.23	2.8998		37.4842	5.2171	2.6764
	36.8441	5.2227	3.3044		41.7434	5.2297	3.208		37.5192	5.2049	3.1455
	36.8781	5.22	3.4508		41.7844	5.2338	2.9498		37.5542	5.2132	2.7051
	36.9131	5.2138	3.3209		41.8214	5.2278	3.2795		37.5882	5.213	2.7525
	36.9481	5.2131	3.2919		41.8574	5.2236	3.3443		37.6232	5.2185	2.8125
	36.9831	5.2196	3.1851		41.8984	5.2192	3.1506		37.6592	5.214	2.8037
	37.0181	5.2125	3.0476		41.9404	5.2312	3.0201		37.6932	5.2106	2.8518
	37.0531	5.2208	2.8099		41.9804	5.2288	3.0659		37.7302	5.2016	3.158
	37.0871	5.2269	2.9203		42.0164	5.2254	3.0455		37.7652	5.2024	3.1798
	37.1211	5.2307	2.5842		42.0574	5.2275	3.051		37.8012	5.2092	2.8916
	37.1551	5.2277	2.9873		42.0944	5.2304	3.0732		37.8352	5.2128	2.8408
	37.1911	5.232	2.6718		42.1354	5.2281	2.9756		37.8702	5.2124	3.004
	37.2261	5.2294	2.9735		42.1764	5.2218	3.209		37.9052	5.2178	3.1062
	37.2611	5.2413	2.8597		42.2164	5.2287	3.1757		37.9402	5.2093	3.1371
	37.2961	5.2299	2.9649		42.2534	5.2174	3.3044		37.9752	5.2242	2.8582
	37.3311	5.2371	2.9388		42.2904	5.2209	3.1727		38.0112	5.2108	3.1101
	37.3651	5.2412	2.9346		42.3314	5.2278	3.1811		38.0472	5.217	2.9503
	37.4001	5.2309	3.1234		42.3724	5.2244	2.7889		38.0832	5.2152	2.7972
	37.4341	5.2285	3.1551		42.4134	5.2336	2.8607		38.1192	5.2093	2.9597
	37.4681	5.2294	2.8766		42.4564	5.2161	3.2562		38.1542	5.2132	2.9867
	37.5031	5.2307	3.0124		42.4924	5.2119	3.5792		38.1892	5.2115	3.2028
	37.5371	5.2313	2.8627		42.5344	5.2204	3.1258		38.2242	5.215	2.9382
	37.5711	5.2348	2.5581		42.5754	5.2216	2.7101		38.2582	5.2176	2.9708
	37.6061	5.249	2.4466		42.6154	5.2138	3.3044		38.2942	5.2262	2.9342
	37.6412	5.2469	2.6023		42.6574	5.2168	2.8602		38.3302	5.2252	2.8049
	37.6762	5.2463	2.6034		42.6924	5.2072	3.2345		38.3652	5.2194	3.084
	37.7112	5.2363	3.0029		42.7374	5.2142	3.0242		38.4002	5.2159	3.0893
	37.7462	5.2428	3.0704		42.7784	5.207	3.2847		38.4352	5.2246	2.9325
	37.7802	5.2364	3.0471		42.8184	5.2095	3.203		38.4702	5.2122	3.2141
	37.8142	5.2409	2.9269		42.8594	5.2077	3.1013		38.5062	5.2218	2.9456
	37.8482	5.2318	3.3115		42.8954	5.2027	3.3295		38.5422	5.2099	3.4015
	37.8822	5.2435	2.6076		42.9344	5.2159	2.8021		38.5782	5.2143	3.1852
	37.9172	5.2372	3.1266		42.9754	5.2089	2.8889		38.6142	5.2204	2.7581
	37.9522	5.2271	3.3653		43.0164	5.2055	3.3077		38.6503	5.2185	2.8066
	37.9862	5.2305	3.059		43.0574	5.2054	3.1746		38.6853	5.2193	3.1046
	38.0212	5.242	2.659		43.0934	5.2245	2.5255		38.7203	5.224	3.2271
	38.0562	5.2372	3.2188		43.1354	5.2058	3.2355		38.7553	5.2181	3.025
	38.0912	5.2445	2.7656		43.1724	5.214	2.7489		38.7903	5.2229	3.0018
	38.1262	5.2384	3.0589		43.2145	5.2063	3.0395		38.8263	5.2163	2.9339
	38.1612	5.2267	3.0652		43.2565	5.1981	3.4741		38.8623	5.212	3.2646
	38.1942	5.2352	2.7356		43.3005	5.1988	3.2305		38.8973	5.2102	3.2307
	38.2292	5.2344	2.9701		43.3415	5.1938	3.202		38.9333	5.2251	2.9821
	38.2632	5.2411	2.412		43.3795	5.1863	3.3592		38.9683	5.2168	3.2053
	38.2982	5.2409	2.8976		43.4205	5.1791	3.3638		39.0023	5.2222	2.7235
	38.3322	5.2221	3.473		43.4635	5.1819	3.2227		39.0373	5.2189	2.9078
	38.3662	5.2308	3.1523		43.5015	5.1661	3.5166		39.0723	5.227	2.6305
	38.4012	5.223	3.5415		43.5435	5.1796	3.0977		39.1083	5.237	2.6533
	38.4352	5.2377	2.7854		43.5855	5.1633	3.5504		39.1443	5.2321	2.8024
	38.4692	5.2281	3.2955		43.6225	5.1611	3.3991		39.1803	5.2366	2.7554
	38.5042	5.2341	3.0082		43.6635	5.1546	3.5418		39.2153	5.2318	2.7637
	38.5392	5.2339	3.1407		43.7085	5.1541	3.4766		39.2503	5.2356	2.9174
	38.5732	5.2417	2.8947		43.7505	5.1514	3.4103		39.2853	5.2313	2.97
	38.6092	5.2197	3.4635		43.7925	5.1497	3.1922		39.3203	5.2351	2.666
	38.6432	5.2235	3.1941		43.8355	5.1525	3.5998		39.3553	5.2274	3.0009
	38.6772	5.2324	3.0116		43.8725	5.1262	3.7588		39.3913	5.234	2.8881
	38.7112	5.2302	3.0826		43.9165	5.1385	3.4684		39.4263	5.2351	2.7404
	38.7462	5.2322	3.1902		43.9585	5.1333	3.3551		39.4623	5.2282	2.9342
	38.7812	5.2206	3.2666		44.0015	5.1522	3.0279		39.4973	5.2266	2.9072
	38.8162	5.2192	3.261		44.0445	5.13	3.26		39.5323	5.2448	2.5925
	38.8512	5.2199	3.3883		44.0815	5.1283	3.2161		39.5673	5.2348	3.0905
	38.8862	5.2369	2.8739		44.1185	5.1363	2.9851		39.6023	5.2259	3.0706
	38.9222	5.2289	2.9023		44.1605	5.1271	3.1798		39.6383	5.2279	2.9031
	38.9582	5.2263	3.4975		44.2025	5.1263	3.1369		39.6723	5.2271	2.9606
	38.9932	5.2226	3.2562		44.2445	5.1272	3.0518		39.7093	5.2221	3.1947
	39.0272	5.2229	3.1353		44.2865	5.106	3.5136		39.7453	5.2301	2.7683
	39.0622	5.2271	3.2615		44.3275	5.1108	3.4599		39.7813	5.2328	3.0521
	39.0962	5.2231	3.3392		44.3695	5.1271	2.571		39.8153	5.2489	2.3604
	39.1312	5.2221	3.49		44.4115	5.1294	2.8986		39.8503	5.2407	2.9922
	39.1662	5.2151	3.4856		44.4545	5.132	2.7331		39.8853	5.239	2.9542
	39.2042	5.2083	3.5843		44.4965	5.1299	3.0511		39.9203	5.2383	2.9275
	39.2392	5.2133	2.9649		44.5345	5.1296	2.7248		39.9563	5.234	2.9039
	39.2742	5.2128	3.3104		44.5715	5.1372	2.7804		39.9913	5.2374	3.0263
	39.3092	5.2242	3.0589		44.6115	5.1329	2.961		40.0273	5.2443	3.047
	39.3432	5.2129	3.409		44.6535	5.1466	2.3153		40.0633	5.2346	2.9987
	39.3783	5.221	3.0059		44.6955	5.1327	3.2083		40.0983	5.2369	2.9525
	39.4123	5.2201	2.9881		44.7325	5.1382	2.6669		40.1333	5.2306	3.2341
	39.4473	5.2163	2.968		44.7695	5.1381	2.78		40.1683	5.2378	3.0271
	39.4813	5.2236	2.8888		44.8105	5.1378	2.6482		40.2043	5.2311	3.1079
	39.5163	5.2156	3.0332		44.8525	5.1357	2.9316		40.2413	5.2456	2.7687
	39.5513	5.2256	2.918		44.8895	5.1499	2.8209		40.2763	5.2414	2.9306
	39.5863	5.217	3.0285		44.9305	5.1312	3.1443		40.3103	5.2399	2.9901
	39.6213	5.2152	2.6371		44.9716	5.141	2.6021		40.3453	5.2336	2.9799
	39.6573	5.2137	3.2185		45.0096	5.1298	3.3885		40.3804	5.2352	2.916
	39.6913	5.2188	2.9329		45.0516	5.1359	3.1585		40.4154	5.2411	2.8853
	39.7263	5.2188	2.8845		45.0896	5.1241	3.1494		40.4504	5.2355	2.9622
	39.7603	5.2193	3.1138		45.1316	5.127	3.4609		40.4854	5.2338	2.9041
	39.7953	5.2087	3.2791		45.1726	5.1381	2.7483		40.5204	5.2394	2.991
	39.8293	5.2124	3.2854		45.2126	5.1285	3.2471		40.5564	5.2339	3.1573
	39.8643	5.2072	3.1024		45.2486	5.1222	3.1572		40.5924	5.2247	3.3784
	39.8993	5.1971	3.4204		45.2896	5.1198	3.0018		40.6284	5.2246	2.8973
	39.9353	5.2078	3.2215		45.3306	5.1185	3.216		40.6624	5.2361	2.9483
	39.9693	5.2177	2.6682		45.3706	5.1102	3.2571		40.6984	5.2258	3.1616
	40.0043	5.2049	3.1497		45.4116	5.1247	3.0485		40.7334	5.2297	3.2072
	40.0393	5.2057	3.0609		45.4476	5.1204	3.1341		40.7684	5.224	3.1162
	40.0743	5.2107	3.0099		45.4886	5.1259	2.7457		40.8024	5.2206	3.4897
	40.1083	5.2194	2.6232		45.5286	5.1108	3.1885		40.8394	5.2214	3.1531
	40.1433	5.213	2.916		45.5696	5.109	3.2888		40.8744	5.2296	3.2982
	40.1773	5.2016	3.2139		45.6106	5.1062	3.2175		40.9104	5.2232	3.0772
	40.2123	5.2103	3.0837		45.6486	5.1072	3.248		40.9444	5.2167	3.3966
	40.2463	5.2079	2.8955		45.6856	5.1091	3.2161		40.9804	5.2185	3.3886
	40.2803	5.2033	2.8194		45.7266	5.0999	3.1276		41.0144	5.2218	3.1126
	40.3143	5.2045	2.6618		45.7706	5.113	3.0913		41.0514	5.2178	3.1566
	40.3483	5.2122	2.6479		45.8086	5.0942	3.3528		41.0884	5.2318	2.7381
	40.3823	5.2172	2.9674		45.8506	5.1064	3.104		41.1224	5.2193	3.1479
	40.4173	5.2191	2.7377		45.8946	5.1064	2.5707		41.1584	5.2343	2.5845
	40.4523	5.2158	2.8431		45.9316	5.118	2.6394		41.1944	5.2324	2.5764
	40.4873	5.2154	2.9082		45.9736	5.1163	2.6267		41.2284	5.2335	3.1199
	40.5223	5.2263	2.5679		46.0106	5.1139	2.8948		41.2644	5.2222	3.1398
	40.5573	5.2245	2.9213		46.0526	5.122	2.7502		41.2994	5.2142	3.188
	40.5923	5.2186	3.0412		46.0926	5.1053	3.1625		41.3344	5.2106	3.2222
	40.6273	5.2253	2.9056		46.1306	5.1039	3.1997		41.3684	5.2104	3.3282
	40.6613	5.2267	2.8508		46.1726	5.1086	3.0035		41.4044	5.2173	3.1561
	40.6953	5.2092	3.3929		46.2096	5.107	3.0468		41.4404	5.2137	3.0753
	40.7293	5.2177	2.8253		46.2506	5.1065	3.1268		41.4744	5.2131	2.8509
	40.7633	5.2288	2.9709		46.2916	5.1122	2.8985		41.5094	5.2156	2.8672
	40.7983	5.2134	2.8641		46.3326	5.1099	2.919		41.5444	5.2193	3.0642
	40.8333	5.2134	3.1158		46.3676	5.1176	2.8463		41.5794	5.2098	3.1788
	40.8673	5.2165	3.0286		46.4086	5.1169	2.8201		41.6144	5.2106	3.0203
	40.9023	5.2146	2.8571		46.4496	5.1212	2.5448		41.6494	5.2119	3.2254
	40.9373	5.2115	3.0169		46.4906	5.1199	2.9094		41.6844	5.2103	3.3427
	40.9723	5.2173	2.8946		46.5316	5.1078	2.9844		41.7204	5.2052	3.3017
	41.0063	5.2112	3.0888		46.5676	5.1106	3.1379		41.7564	5.208	3.0568
	41.0403	5.2028	3.3947		46.6046	5.1203	2.9554		41.7914	5.21	3.0533
	41.0753	5.1976	3.3427		46.6456	5.112	2.986		41.8264	5.2156	2.8011
	41.1104	5.2039	3.2066		46.6876	5.1104	3.0883		41.8614	5.211	3.099
	41.1454	5.2045	3.209		46.7247	5.1125	2.9074		41.8954	5.2135	3.0229
	41.1804	5.2126	3.0535		46.7647	5.1062	3.2347		41.9304	5.2187	2.9262
	41.2164	5.2005	3.1198		46.8017	5.1117	3.4184		41.9654	5.205	3.3661
	41.2514	5.2115	2.9504		46.8437	5.1188	2.8954		42.0004	5.203	3.2228
	41.2864	5.2074	3.0242		46.8837	5.1163	2.8278		42.0364	5.1973	3.58
	41.3214	5.1983	3.058		46.9217	5.1182	2.8044		42.0724	5.2049	3.0241
	41.3564	5.1926	3.4308		46.9617	5.1066	3.1328		42.1074	5.1964	3.514
	41.3904	5.1872	3.4292		47.0037	5.1247	2.6426		42.1415	5.1953	3.3903
	41.4254	5.1938	3.2465		47.0407	5.1229	2.9171		42.1765	5.2049	2.8275
	41.4604	5.1867	3.3461		47.0817	5.1164	2.9339		42.2125	5.201	3.1474
	41.4944	5.1762	3.562		47.1187	5.1159	2.9041		42.2475	5.2081	2.7755
	41.5294	5.1865	3.1554		47.1597	5.1229	2.9377		42.2825	5.208	2.9811
	41.5654	5.1658	3.7113		47.2007	5.1263	2.9066		42.3195	5.2035	3.1707
	41.5994	5.1647	3.3712		47.2427	5.1089	3.1313		42.3555	5.2145	2.9261
	41.6344	5.155	3.528		47.2777	5.1111	3.1788		42.3905	5.1967	3.2787
	41.6694	5.1631	3.4341		47.3177	5.1241	2.8677		42.4255	5.2052	2.9297
	41.7034	5.1439	3.6446		47.3597	5.1306	2.9284		42.4615	5.195	3.4525
	41.7364	5.1354	3.8457		47.4017	5.114	3.4506		42.4965	5.1942	2.9038
	41.7714	5.1419	3.3372		47.4437	5.1096	3.2632		42.5315	5.1927	3.356
	41.8064	5.1391	3.5601		47.4787	5.107	3.3303		42.5675	5.1924	3.1534
	41.8414	5.1358	3.3122		47.5207	5.1092	3.1727		42.6025	5.1946	3.0009
	41.8754	5.122	3.7899		47.5627	5.1142	3.2854		42.6385	5.198	3.1405
	41.9094	5.108	3.9806		47.6047	5.1202	2.8123		42.6735	5.1818	3.332
	41.9444	5.104	4.0419		47.6417	5.1247	2.8625		42.7085	5.1802	3.3048
	41.9794	5.0872	4.2442		47.6827	5.1124	3.2057		42.7435	5.2018	2.5721
	42.0154	5.0894	3.832		47.7207	5.1042	3.253		42.7785	5.2008	2.8608
	42.0504	5.0789	4.0477		47.7617	5.1105	3.0542		42.8145	5.2029	2.7408
	42.0854	5.0781	3.8381		47.8037	5.1214	2.6754		42.8485	5.1991	2.9475
	42.1194	5.0814	3.4666		47.8407	5.1128	3.0206		42.8845	5.193	3.1624
	42.1544	5.08	3.393		47.8807	5.1085	3.1062		42.9205	5.1936	3.0837
	42.1884	5.0692	3.5253		47.9227	5.1062	3.1274		42.9555	5.1932	3.0237
	42.2234	5.0683	3.3521		47.9587	5.1032	2.8393		42.9895	5.1893	3.1148
	42.2584	5.075	3.469		47.9997	5.1066	3.2395		43.0245	5.1944	2.918
	42.2934	5.0806	3.1124		48.0377	5.0995	2.9329		43.0595	5.1897	3.3077
	42.3284	5.0853	2.9864		48.0797	5.1075	2.7436		43.0945	5.1832	3.0936
	42.3644	5.0867	3.2518		48.1207	5.1214	2.9022		43.1295	5.2002	3.0595
	42.3994	5.0865	2.9011		48.1577	5.1186	2.7598		43.1655	5.1895	3.1395
	42.4344	5.0776	3.1466		48.1957	5.1165	2.9664		43.2005	5.1887	2.9716
	42.4694	5.0631	3.4711		48.2367	5.1025	3.0978		43.2355	5.1879	2.7976
	42.5034	5.0697	3.1958		48.2767	5.1146	2.7735		43.2705	5.1856	3.0336
	42.5384	5.073	2.8362		48.3187	5.1112	3.1185		43.3055	5.1934	2.8373
	42.5724	5.0608	3.3575		48.3597	5.11	2.9906		43.3405	5.1992	2.8363
	42.6064	5.0702	3.0649		48.3947	5.1137	3.0046		43.3755	5.194	2.7895
	42.6414	5.0672	3.4336		48.4347	5.1085	3.0878		43.4105	5.1867	2.9527
	42.6764	5.0654	3.4538		48.4758	5.1003	3.0754		43.4455	5.1776	3.2586
	42.7124	5.043	3.4199		48.5178	5.103	3.1006		43.4815	5.188	2.934
	42.7484	5.0529	3.119		48.5588	5.0964	3.3061		43.5165	5.1724	3.2049
	42.7824	5.0469	3.4699		48.5968	5.1068	3.1965		43.5525	5.1793	3.2854
	42.8174	5.0348	3.4288		48.6338	5.1106	2.9		43.5875	5.1748	3.1019
	42.8524	5.0423	3.4824		48.6748	5.1074	2.8772		43.6225	5.1853	2.9688
	42.8865	5.0305	3.7741		48.7168	5.098	3.1876		43.6575	5.1725	3.3021
	42.9205	5.0347	3.4487		48.7528	5.1101	2.8955		43.6935	5.1677	3.2852
	42.9555	5.0318	3.4227		48.7938	5.1026	3.1185		43.7275	5.1761	3.0497
	42.9905	5.025	3.573		48.8308	5.0956	3.0508		43.7635	5.1817	3.0171
	43.0255	5.0212	3.4562		48.8708	5.0905	3.2643		43.7995	5.1663	3.3824
	43.0615	5.0225	3.6001		48.9118	5.0981	3.0005		43.8365	5.1784	2.8478
	43.0965	5.0219	3.3377		48.9488	5.0981	3.0808		43.8715	5.1836	2.8353
	43.1305	5.0233	3.1235		48.9898	5.1018	3.1627		43.9066	5.1698	3.0095
	43.1655	5.0256	2.9579		49.0308	5.0923	3.1479		43.9416	5.169	3.1398
	43.2005	5.0284	3.005		49.0688	5.1033	3.3452		43.9766	5.1734	2.8795
	43.2345	5.0311	2.693		49.1048	5.0965	3.1533		44.0106	5.1672	3.2752
	43.2685	5.0344	2.5281		49.1458	5.0984	3.2275		44.0466	5.1743	3.0337
	43.3035	5.018	3.1101		49.1868	5.0977	3.1167		44.0816	5.1722	3.1012
	43.3375	5.0249	3.0666		49.2278	5.0978	3.1543		44.1176	5.1738	3.1935
	43.3715	5.0121	3.4417		49.2678	5.1009	2.811		44.1536	5.1692	3.0267
	43.4065	5.0272	2.756		49.3028	5.0898	3.3006		44.1886	5.1774	2.9275
	43.4415	5.0223	2.9723		49.3438	5.0908	3.2553		44.2236	5.172	2.9199
	43.4755	5.0185	3.2276		49.3858	5.096	2.8188		44.2586	5.1602	3.344
	43.5105	5.0242	3.0459		49.4258	5.0944	3.2162		44.2936	5.16	3.0783
	43.5455	5.0233	2.8689		49.4668	5.0851	3.1722		44.3276	5.1703	3.2119
	43.5805	5.0179	3.1048		49.5018	5.0983	2.8581		44.3646	5.1652	3.1161
	43.6155	5.0293	2.9815		49.5428	5.083	3.5398		44.4006	5.171	3.2292
	43.6505	5.0311	2.8841		49.5838	5.0731	3.4259		44.4346	5.1669	3.2543
	43.6845	5.0172	3.176		49.6278	5.0826	2.9141		44.4696	5.1745	2.9446
	43.7185	5.0196	2.9304		49.6668	5.0798	3.0341		44.5046	5.1706	2.7872
	43.7525	5.0171	3.0233		49.7078	5.0865	3.0296		44.5396	5.1568	3.4574
	43.7865	5.0167	3.0583		49.7448	5.0916	2.7958		44.5746	5.1644	3.1971
	43.8205	5.0184	2.8426		49.7868	5.0894	3.0016		44.6096	5.1676	2.8595
	43.8555	5.0154	3.0105		49.8268	5.0874	2.9422		44.6466	5.1568	3.2288
	43.8895	5.0262	2.7463		49.8648	5.0843	3.1156		44.6826	5.165	3.022
	43.9255	5.0154	3.1278		49.9058	5.0703	3.1819		44.7176	5.1549	3.5081
	43.9605	5.0056	2.9092		49.9468	5.0723	3.6053		44.7526	5.1532	3.317
	43.9955	5.0184	2.6338		49.9838	5.0762	2.9097		44.7876	5.1531	3.0829
	44.0295	5.0129	2.9797		50.0208	5.0844	2.9078		44.8226	5.1521	2.9556
	44.0635	5.0131	3.0869		50.0618	5.0864	2.8872		44.8586	5.1371	3.2798
	44.0985	5.0168	3.0435		50.1028	5.0777	3.0958		44.8926	5.1425	2.9954
	44.1335	5.0181	3.1556		50.1438	5.0834	2.9203		44.9296	5.1437	3.1196
	44.1685	5.015	2.9511		50.1818	5.0928	2.8787		44.9666	5.1473	3.0579
	44.2025	5.0023	3.3579		50.2179	5.0927	2.9867		45.0006	5.1519	2.8526
	44.2365	5.0123	2.927		50.2589	5.0933	2.5952		45.0356	5.1475	2.672
	44.2705	5.0065	3.1343		50.2989	5.0872	2.9897		45.0706	5.1519	2.7819
	44.3045	5.0069	3.0185		50.3399	5.0894	3.1749		45.1056	5.1476	2.9952
	44.3395	5.01	2.5531		50.3809	5.0932	2.7586		45.1406	5.1505	2.7885
	44.3745	5.0037	2.799		50.4159	5.0865	3.1302		45.1766	5.1517	2.7388
	44.4095	5.0049	2.8836		50.4569	5.0796	3.1293		45.2126	5.1499	2.7033
	44.4445	5.004	2.9813		50.4979	5.0829	3.0669		45.2486	5.1461	2.9512
	44.4795	5.0034	2.9333		50.5389	5.0893	3.0169		45.2836	5.1535	2.8589
	44.5135	5.0107	3.0697		50.5759	5.0818	3.0795		45.3186	5.1564	2.6751
	44.5485	5.0044	3.0078		50.6169	5.0772	3.29		45.3536	5.1495	3.0858
	44.5835	5.0101	2.9914		50.6539	5.0787	3.1347		45.3886	5.1536	2.6918
	44.6176	5.0008	3.3577		50.6959	5.0649	3.4254		45.4236	5.1578	2.9232
	44.6526	5.0129	3.0307		50.7369	5.0748	3.557		45.4586	5.1585	2.7956
	44.6876	5.0233	2.7982		50.7749	5.0616	3.4332		45.4946	5.1629	2.777
	44.7226	5.0154	2.8958		50.8169	5.0703	3.1431		45.5306	5.1653	2.8948
	44.7576	5.0084	3.1914		50.8549	5.0793	3.0514		45.5646	5.1658	2.801
	44.7926	4.9975	3.4776		50.8959	5.0824	2.9219		45.5996	5.1628	2.8064
	44.8276	5.0003	3.2778		50.9369	5.0836	3.0964		45.6357	5.1621	3.0003
	44.8626	5.0039	3.3471		50.9739	5.0672	3.0632		45.6707	5.1619	3.2021
	44.8966	5.0008	3.1533		51.0159	5.0761	2.7065		45.7057	5.1599	2.9483
	44.9316	5.001	3.2849		51.0569	5.0821	3.0776		45.7397	5.1695	3.008
	44.9666	4.9928	3.1278		51.0939	5.0815	2.7583		45.7757	5.1659	3.0447
	45.0016	4.9878	3.7039		51.1329	5.0774	2.8526		45.8107	5.1698	2.9971
	45.0366	4.9969	2.9615		51.1749	5.0796	3.0305		45.8467	5.1621	2.9941
	45.0706	4.998	2.6517		51.2159	5.0733	2.9364		45.8817	5.1614	2.9939
	45.1046	4.99	2.8714		51.2569	5.0802	2.9008		45.9177	5.1661	3.057
	45.1396	4.9935	2.8269		51.2979	5.0906	2.6331		45.9717	5.1705	2.8908
	45.1746	4.9976	2.6569		51.3329	5.0797	3.0037		46.0077	5.167	2.6913
	45.2086	5.0052	2.7073		51.3739	5.0769	2.8876		46.0437	5.1673	2.8289
	45.2436	5.0091	2.5224		51.4159	5.0824	2.5254		46.0797	5.1664	2.8997
	45.2786	5.0011	2.6955		51.4579	5.0896	2.8417		46.1157	5.1577	3.2656
	45.3126	4.998	3.0146		51.4959	5.0922	2.623		46.1497	5.1592	3.1451
	45.3476	5.0064	2.861		51.5329	5.0833	2.9837		46.1847	5.1591	3.1042
	45.3816	5.004	3.1157		51.5779	5.0936	3.0053		46.2197	5.1575	3.0569
	45.4166	5.0087	2.7043		51.6189	5.0847	2.6914		46.2547	5.1603	2.9269
	45.4516	5.016	2.7364		51.6609	5.0856	3.2081		46.2897	5.1537	2.9143
	45.4856	5.0143	2.8108		51.6989	5.0923	2.7465		46.3247	5.1397	3.418
	45.5206	5.0185	2.904		51.7399	5.0753	3.537		46.3607	5.1536	3.0846
	45.5556	5.0062	3.1649		51.7779	5.0744	3.2519		46.3957	5.1518	3.2448
	45.5906	5.003	2.9405		51.8199	5.0832	2.7287		46.4307	5.1543	2.9837
	45.6246	5.0078	3.0312		51.8639	5.0935	2.8193		46.4657	5.1625	2.754
	45.6596	5.007	3.0095		51.9009	5.0813	3.1725		46.5007	5.1571	2.8803
	45.6936	5.0037	2.8979		51.944	5.0852	3.0616		46.5357	5.1538	3.0568
	45.7286	5.0147	2.7227		51.986	5.0884	2.7354		46.5707	5.1611	2.7706
	45.7636	5.0142	2.5265		52.023	5.0943	2.7526		46.6057	5.1633	2.7438
	45.7986	5.0159	2.8647		52.061	5.0925	2.6173		46.6417	5.1649	2.8966
	45.8336	5.0099	2.885		52.102	5.0976	2.6023		46.6777	5.1602	2.7181
	45.8686	5.0175	2.8531		52.145	5.0906	3.0105		46.7127	5.1623	3.0264
	45.9046	5.0199	2.7862		52.185	5.0893	2.7058		46.7487	5.1502	2.9213
	45.9386	5.0225	2.7029		52.222	5.0903	3.0257		46.7827	5.1535	3.0455
	45.9736	5.0285	2.4685		52.259	5.0947	2.8383		46.8187	5.1578	3.2697
	46.0086	5.0118	3.173		52.301	5.0952	2.6936		46.8537	5.1523	3.1767
	46.0436	5.0165	2.949		52.342	5.0977	2.9533		46.8877	5.1533	3.3113
	46.0786	5.018	2.7364		52.377	5.0823	2.7861		46.9247	5.1549	3.3595
	46.1126	5.0389	2.472		52.414	5.1072	2.5236		46.9597	5.1394	3.5947
	46.1466	5.0342	2.9874		52.451	5.0973	2.8834		46.9947	5.1316	3.6927
	46.1806	5.0317	3.064		52.493	5.1136	2.5917		47.0297	5.1405	3.3087
	46.2146	5.0219	3.3872		52.534	5.1003	3.1057		47.0657	5.1266	3.5102
	46.2486	5.0183	3.2974		52.576	5.1156	2.5547		47.1007	5.1409	2.9327
	46.2826	5.0121	3.2448		52.612	5.12	2.5757		47.1347	5.137	3.1956
	46.3166	5.0136	3.0402		52.652	5.125	2.4707		47.1707	5.1317	3.1694
	46.3506	5.0204	2.7912		52.689	5.1253	2.5174		47.2077	5.1366	3.0542
	46.3867	5.0232	2.9822		52.73	5.1205	2.7478		47.2447	5.1507	2.736
	46.4217	5.014	2.982		52.771	5.1148	2.7682		47.2787	5.1443	2.916
	46.4557	5.0049	3.3267		52.809	5.1063	3.2533		47.3137	5.1456	2.8501
	46.4907	5.005	3.2056		52.849	5.1158	3.2211		47.3487	5.1425	3.0903
	46.5257	5.0121	2.9869		52.887	5.1105	2.7148		47.3838	5.135	3.1275
	46.5607	5.0119	3.2862		52.93	5.1079	3.0478		47.4188	5.1457	2.7796
	46.5947	5.0127	2.935		52.966	5.1141	2.9513		47.4538	5.1497	2.8297
	46.6297	5.0082	2.9781		53.007	5.1096	3.1398		47.4908	5.1406	3.1271
	46.6637	5.0048	3.0737		53.049	5.1046	3.22		47.5258	5.1617	2.8527
	46.6987	5.0044	3.0601		53.09	5.1061	3.2448		47.5608	5.1728	2.3396
	46.7327	5.0088	3.1227		53.129	5.1022	3.3263		47.5958	5.1845	2.4218
	46.7667	4.9983	3.5237		53.167	5.092	3.5175		47.6318	5.1812	2.4094
	46.8007	5.004	3.2999		53.209	5.0934	2.9672		47.6668	5.1717	2.6788
	46.8357	5.0029	3.0301		53.251	5.1035	3.159		47.7008	5.165	2.9494
	46.8697	4.9984	3.1073		53.292	5.0946	3.1968		47.7358	5.1802	2.505
	46.9047	5.0122	2.9195		53.332	5.0974	3.2146		47.7728	5.1693	3.1147
	46.9397	5.0042	3.008		53.367	5.0942	3.0927		47.8078	5.1641	3.2076
	46.9747	5.0063	2.8434		53.408	5.0919	3.0887		47.8428	5.1548	3.1084
	47.0107	4.9962	3.158		53.451	5.0961	3.2017		47.8778	5.1496	3.268
	47.0447	4.9908	3.3409		53.491	5.1014	2.7187		47.9128	5.1592	2.8709
	47.0787	4.9845	3.3254		53.527	5.0935	3.1574		47.9478	5.1588	3.0774
	47.1137	4.9994	2.7272		53.564	5.0895	3.4606		47.9838	5.1523	3.1708
	47.1477	5.008	2.739		53.604	5.0942	3.2143		48.0178	5.1616	2.9289
	47.1817	4.9981	3.1006		53.645	5.0961	2.8743		48.0538	5.167	3.0171
	47.2177	4.999	2.9996		53.686	5.0953	3.1699		48.0888	5.1527	3.1667
	47.2527	5.0021	2.9422		53.7231	5.0962	2.8047		48.1248	5.1585	2.9584
	47.2867	4.9966	3.2068		53.7641	5.0919	2.8626		48.1598	5.1492	3.1716
	47.3217	5.0049	3.0512		53.8001	5.0857	3.4912		48.1948	5.1495	3.0341
	47.3567	4.9968	3.1535		53.8411	5.1004	2.7836		48.2308	5.1566	2.9005
	47.3917	4.9965	3.1364		53.8781	5.098	2.9251		48.2658	5.1523	3.1196
	47.4257	5.0054	2.9778		53.9201	5.0975	3.0123		48.2998	5.1601	2.9005
	47.4597	4.9903	3.3159		53.9611	5.0956	2.8087		48.3358	5.1566	3.0248
	47.4937	4.9916	3.273		53.9981	5.0917	3.1602		48.3718	5.1597	2.8947
	47.5287	4.9938	2.9183		54.0381	5.0913	3.0347		48.4068	5.1627	3.0856
	47.5637	4.99	2.8485		54.0751	5.0928	2.9959		48.4418	5.1564	2.8914
	47.5987	4.999	2.7679		54.1161	5.0988	2.6679		48.4768	5.156	2.9932
	47.6337	4.9873	3.258		54.1571	5.0941	3.2879		48.5118	5.165	2.6916
	47.6687	4.9905	3.1903		54.1981	5.1038	2.8173		48.5468	5.1669	2.7717
	47.7027	4.9873	2.9687		54.2351	5.093	3.107		48.5828	5.1587	3.0374
	47.7377	4.9929	2.8809		54.2721	5.0937	3.1381		48.6168	5.1566	2.9704
	47.7727	4.9887	2.891		54.3141	5.0939	3.1719		48.6538	5.1499	3.2444
	47.8077	4.987	2.8403		54.3551	5.0889	2.9608		48.6888	5.1587	2.9837
	47.8417	4.9751	3.2928		54.3961	5.084	3.2817		48.7238	5.156	2.8405
	47.8757	4.9861	2.945		54.4331	5.0864	2.9384		48.7598	5.1587	2.8528
	47.9107	4.9755	3.3946		54.4721	5.0969	3.1304		48.7938	5.1511	2.9755
	47.9447	4.9876	2.9397		54.5191	5.0897	3.2012		48.8298	5.1611	2.8379
	47.9787	4.9804	3.1921		54.5611	5.0977	2.9024		48.8658	5.1611	2.6795
	48.0137	4.9891	2.9475		54.6041	5.1012	2.8873		48.8998	5.1454	3.3071
	48.0497	4.9796	3.2415		54.6411	5.1	2.9902		48.9358	5.1425	3.3411
	48.0847	4.9789	3.3236		54.6781	5.1049	2.9651		48.9708	5.1503	3.0092
	48.1198	4.9819	3.1758		54.7211	5.0992	2.7692		49.0068	5.1456	3.2768
	48.1538	4.9733	3.0238		54.7621	5.0968	3.2536		49.0408	5.1584	3.0173
	48.1888	4.9786	3.1203		54.8041	5.0992	2.9938		49.0768	5.1495	3.2582
	48.2228	4.9839	2.7507		54.8411	5.1024	2.7266		49.1108	5.1442	3.3153
	48.2568	4.9842	2.7914		54.8821	5.0967	2.8519		49.1459	5.1445	3.285
	48.2908	4.9846	2.7503		54.9201	5.0875	3.183		49.1819	5.1304	3.6656
	48.3258	4.9847	2.8675		54.9621	5.0931	2.9567		49.2169	5.1486	3.1193
	48.3598	4.9689	3.1399		55.0041	5.1047	2.6016		49.2529	5.1438	3.2181
	48.3948	4.9811	2.6544		55.0411	5.1029	2.7119		49.2879	5.1333	3.6142
	48.4298	4.9818	3.1875		55.0821	5.1023	2.8909		49.3229	5.1363	3.3255
	48.4658	4.9783	2.9242		55.1251	5.1039	2.9735		49.3579	5.1373	3.1135
	48.4998	4.9873	2.9694		55.1621	5.1057	2.6184		49.3929	5.1378	3.3529
	48.5338	4.9736	3.1412		55.2071	5.1061	2.7463		49.4279	5.137	3.1999
	48.5688	4.9767	3.1587		55.2431	5.101	2.7339		49.4629	5.1339	3.1081
	48.6028	4.9775	3.1742		55.2861	5.1024	2.7477		49.4969	5.1384	3.0214
	48.6368	4.9766	3.306		55.3291	5.1111	3.0173		49.5319	5.131	3.1274
	48.6708	4.9756	3.2775		55.3671	5.1126	3.0573		49.5679	5.1336	3.248
	48.7058	4.9769	3.1239		55.4081	5.1087	3.0131		49.6019	5.1394	2.9353
	48.7398	4.9585	3.4583		55.4502	5.1014	2.7969		49.6379	5.1393	3.0098
	48.7738	4.9745	3.2313		55.4862	5.107	2.8697		49.6719	5.1434	3.0365
	48.8088	4.976	3.1234		55.5272	5.0888	3.3924		49.7069	5.1472	3.0843
	48.8438	4.975	3.0831		55.5712	5.1023	2.8402		49.7419	5.1471	3.0143
	48.8778	4.9665	3.2157		55.6072	5.1139	2.6606		49.7769	5.1397	2.9947
	48.9118	4.9672	3.1653		55.6492	5.0961	3.292		49.8119	5.1397	3.0826
	48.9478	4.9661	3.065		55.6862	5.1025	3.3479		49.8469	5.1453	3.0078
	48.9818	4.9672	3.0977		55.7282	5.1082	3.2119		49.8829	5.128	3.4257
	49.0168	4.9653	3.0104		55.7682	5.1013	2.9587		49.9189	5.1358	3.2273
	49.0518	4.9668	3.0699		55.8092	5.0981	3.5805		49.9539	5.1302	3.2266
	49.0858	4.9754	2.9167		55.8462	5.0895	3.2312		49.9889	5.1418	2.8937
	49.1208	4.9764	2.9831		55.8832	5.0961	3.1581		50.0239	5.1338	2.8475
	49.1548	4.9639	3.0816		55.9232	5.0995	3.1609		50.0589	5.1328	2.7867
	49.1898	4.958	3.1633		55.9632	5.0923	3.613		50.0939	5.1336	2.6065
	49.2248	4.9677	3.0276		56.0042	5.0967	3.0951		50.1289	5.1256	2.9524
	49.2588	4.9699	3.0319		56.0402	5.0893	3.6053		50.1649	5.134	2.8907
	49.2938	4.9653	2.9062		56.0762	5.0921	3.0403		50.1999	5.1362	2.6864
	49.3298	4.98	2.6679		56.1172	5.098	2.9427		50.2359	5.1352	2.7278
	49.3648	4.9762	2.7551		56.1582	5.0863	3.2529		50.2719	5.1396	2.8163
	49.3998	4.9725	2.9198		56.1982	5.0892	3.3245		50.3069	5.13	3.1161
	49.4348	4.9712	3.0969		56.2392	5.0832	3.0872		50.3419	5.1297	3.0307
	49.4688	4.9694	3.0286		56.2732	5.0809	3.4856		50.3779	5.1216	3.1191
	49.5038	4.965	3.1731		56.3132	5.0746	3.7318		50.4129	5.1392	2.7707
	49.5388	4.9676	2.8761		56.3542	5.0695	3.5202		50.4469	5.1286	3.0377
	49.5738	4.9768	2.6621		56.3942	5.065	3.4965		50.4829	5.1273	3.3906
	49.6088	4.9623	2.9983		56.4332	5.0562	3.7031		50.5189	5.1365	2.8638
	49.6438	4.9765	2.8729		56.4752	5.0566	3.3627		50.5539	5.1183	3.4076
	49.6788	4.9722	2.8073		56.5122	5.0636	3.4561		50.5889	5.1238	3.2874
	49.7138	4.9704	2.8865		56.5522	5.0546	3.2777		50.6239	5.1242	3.4133
	49.7488	4.9634	2.9802		56.5932	5.0618	2.7746		50.6589	5.1321	2.936
	49.7838	4.9669	2.9312		56.6322	5.0673	2.9996		50.6969	5.1277	3.0933
	49.8188	4.9622	3.211		56.6682	5.0652	2.7659		50.7329	5.1313	2.8477
	49.8539	4.9627	2.9648		56.7082	5.0567	2.8007		50.7679	5.1319	2.7435
	49.8889	4.9802	2.8429		56.7482	5.0716	2.5269		50.8029	5.1269	2.8876
	49.9239	4.9901	2.5563		56.7892	5.0828	2.3564		50.8379	5.1291	3.1287
	49.9589	4.9834	2.8562		56.8302	5.0843	2.4901		50.873	5.125	3.1376
	49.9949	4.9745	3.1487		56.8672	5.0819	2.7399		50.908	5.133	2.8816
	50.0289	4.9746	3.1056		56.9072	5.0767	2.8589		50.943	5.1308	3.2138
	50.0649	4.9746	2.972		56.9442	5.0734	2.9715		50.978	5.1374	2.7852
	50.0989	4.9599	3.5224		56.9862	5.0745	2.974		51.015	5.128	3.0521
	50.1339	4.9679	3.0398		57.0292	5.0806	2.8764		51.051	5.1397	2.9161
	50.1679	4.9733	3.1278		57.0662	5.0672	3.3308		51.086	5.1293	2.7789
	50.2029	4.9702	3.217		57.1072	5.0803	2.6573		51.122	5.1286	2.9232
	50.2369	4.971	3.2085		57.1482	5.0823	2.7471		51.156	5.1471	2.6525
	50.2719	4.9624	3.1605		57.1853	5.0855	2.8747		51.191	5.1428	2.9685
	50.3069	4.9576	3.1662		57.2263	5.0776	3.0837		51.226	5.1501	2.423
	50.3419	4.9685	2.9588		57.2663	5.0822	2.7846		51.261	5.1662	2.2546
	50.3759	4.9771	2.6813		57.3083	5.0692	3.3597		51.297	5.1611	2.4897
	50.4109	4.9825	2.5604		57.3493	5.0796	2.6367		51.334	5.1578	2.5676
	50.4469	4.9882	2.6088		57.3873	5.0772	3.0529		51.369	5.1586	2.7844
	50.4809	4.9904	2.6419		57.4273	5.0824	2.7371		51.404	5.1532	2.7412
	50.5159	4.9879	2.4347		57.4643	5.0663	3.2101		51.44	5.1637	2.5593
	50.5509	4.9913	2.759		57.5053	5.0788	3.035		51.474	5.1664	2.6781
	50.5859	4.988	2.8241		57.5473	5.0628	3.1649		51.509	5.1634	2.4952
	50.6199	4.9849	3.0064		57.5873	5.0762	2.7652		51.545	5.1621	2.6374
	50.6539	4.9852	2.9753		57.6253	5.0879	2.59		51.58	5.1543	2.865
	50.6879	4.9916	3.0938		57.6653	5.085	2.6238		51.616	5.1609	2.8213
	50.7219	4.9843	3.0504		57.7023	5.0785	2.9862		51.651	5.1629	2.94
	50.7559	4.9814	3.3305		57.7443	5.0904	3.0467		51.686	5.1587	2.8027
	50.7899	4.9834	3.1467		57.7853	5.0806	3.0264		51.72	5.1507	3.2606
	50.8259	4.9826	3.2301		57.8273	5.0841	3.0562		51.755	5.1517	2.9279
	50.8599	4.985	3.0718		57.8643	5.0893	2.8705		51.79	5.1541	2.9563
	50.8949	4.987	2.8829		57.9003	5.0865	2.9334		51.825	5.1513	3.039
	50.9299	4.9931	2.7724		57.9413	5.0781	3.0805		51.861	5.1493	2.8129
	50.9649	4.9844	3.1647		57.9833	5.0831	2.6704		51.897	5.145	3.1099
	50.9989	4.9801	2.8749		58.0243	5.0745	3.14		51.932	5.157	3.1744
	51.0339	4.9809	2.9302		58.0603	5.0815	2.752		51.993	5.1564	3.0783
	51.0689	4.9685	3.2923		58.0973	5.0921	2.6768		52.029	5.1637	2.6974
	51.1039	4.9745	3.2651		58.1383	5.0916	2.616		52.065	5.148	3.306
	51.1389	4.9609	3.5807		58.1783	5.0934	2.8116		52.102	5.1421	3.3371
	51.1729	4.9774	3.1505		58.2193	5.0881	2.6648		52.136	5.1442	3.3221
	51.2069	4.9677	3.1282		58.2603	5.0819	3.315		52.171	5.1339	3.4419
	51.2419	4.9594	3.4692		58.2953	5.093	2.6622		52.206	5.1298	3.497
	51.2779	4.9695	3.005		58.3363	5.0851	3.0225		52.242	5.1312	3.1762
	51.3119	4.9658	3.3219		58.3783	5.0791	3.2596		52.277	5.1294	3.1605
	51.3469	4.9675	3.0325		58.4183	5.0866	2.8798		52.313	5.1313	3.473
	51.3819	4.9672	3.2448		58.4603	5.0763	3.4028		52.348	5.1403	3.0268
	51.4159	4.972	2.8665		58.4973	5.0754	3.2225		52.383	5.1442	2.7111
	51.4509	4.969	3.0135		58.5333	5.0679	3.2991		52.418	5.1509	2.7116
	51.4859	4.9609	3.3945		58.5743	5.0683	3.0266		52.453	5.1503	2.8039
	51.5199	4.9703	2.9738		58.6153	5.0618	3.6855		52.488	5.1558	2.7533
	51.5539	4.9626	2.8983		58.6563	5.0729	2.8139		52.523	5.1454	2.7721
	51.5879	4.9664	2.9176		58.6933	5.0732	3.2652		52.558	5.1564	2.5225
	51.622	4.9584	2.913		58.7303	5.0658	3.2903		52.594	5.1537	2.8023
	51.657	4.9736	2.796		58.7713	5.0689	3.1205		52.6301	5.1601	2.7375
	51.692	4.9797	2.8251		58.8133	5.0705	3.0717		52.6651	5.161	2.6437
	51.728	4.9727	2.7594		58.8543	5.0794	2.6853		52.7001	5.1665	2.7154
	51.762	4.9788	2.9173		58.8923	5.0501	3.498		52.7351	5.1603	2.736
	51.796	4.9627	3.3134		58.9344	5.0541	3.4414		52.7701	5.1709	2.7338
	51.83	4.972	2.9919		58.9714	5.0493	3.3384		52.8051	5.1557	3.0853
	51.864	4.9698	3.0883		59.0174	5.0436	3.7203		52.8411	5.1503	3.3563
	51.898	4.9583	3.1409		59.0594	5.0414	3.3186		52.8761	5.1479	3.3818
	51.932	4.9602	3.0787		59.0954	5.0445	3.509		52.9121	5.1331	3.4328
	51.966	4.9646	2.9192		59.1374	5.0358	3.5276		52.9481	5.125	3.5929
	52.001	4.9713	2.9247		59.1794	5.0402	3.0866		52.9821	5.137	3.1438
	52.036	4.976	2.6501		59.2164	5.0497	2.9722		53.0181	5.1384	3.1392
	52.071	4.9706	2.6213		59.2574	5.0583	2.8565		53.0531	5.1308	3.1766
	52.106	4.9693	2.8079		59.2964	5.0629	2.7025		53.0881	5.1291	3.5115
	52.141	4.9697	2.9379		59.3384	5.0523	2.9781		53.1241	5.1323	3.0437
	52.175	4.983	2.515		59.3794	5.0633	2.4062		53.1731	5.1415	2.7484
	52.21	4.9776	2.7222		59.4154	5.0565	2.9172		53.2081	5.1394	2.9681
	52.245	4.9784	2.672		59.4574	5.0619	2.7726		53.2441	5.1443	2.8939
	52.279	4.989	2.575		59.4934	5.0654	2.8759		53.2801	5.1471	2.7212
	52.313	4.982	3.0812		59.5344	5.057	3.0778		53.3171	5.1405	3.1587
	52.348	4.9835	2.9918		59.5764	5.0719	2.8499		53.3521	5.1471	2.7154
	52.383	4.9761	3.3404		59.6164	5.0684	2.7444		53.3871	5.1367	2.9338
	52.417	4.9733	3.0457		59.6534	5.0681	2.7661		53.4221	5.1372	2.9597
	52.451	4.9767	3.0663		59.6894	5.0673	2.92		53.4581	5.1286	3.2912
	52.485	4.9816	2.8294		59.7304	5.0738	2.6125		53.4931	5.1384	2.9264
	52.519	4.9656	3.2251		59.7704	5.0674	3.2509		53.5301	5.14	2.7751
	52.555	4.9816	2.8143		59.8114	5.0669	3.108		53.5661	5.1507	2.4086
	52.59	4.9826	2.7913		59.8524	5.0705	2.959		53.6011	5.1378	3.0952
	52.625	4.98	3.0083		59.8874	5.0649	2.9581		53.6361	5.1392	2.8332
	52.66	4.9825	3.0307		59.9284	5.0724	2.8793		53.6711	5.1308	3.3374
	52.695	4.9734	3.1872		59.9684	5.0588	3.1103		53.7071	5.1471	2.9214
	52.73	4.9722	3.1931		60.0094	5.0779	2.8137		53.7431	5.1365	3.231
	52.764	4.9622	3.3665		60.0504	5.0703	2.9213		53.7801	5.1488	2.9352
	52.798	4.9533	3.3365		60.0864	5.0772	3.0041		53.8151	5.1494	2.8101
	52.832	4.9585	3.717		60.1244	5.0574	3.4427		53.8511	5.153	2.763
	52.867	4.9488	3.7091		60.1644	5.0629	3.0225		53.8921	5.1631	2.8187
	52.901	4.9516	3.3658		60.2064	5.0579	3.211		53.9301	5.1473	3.1807
	52.935	4.9524	3.2635		60.2474	5.0747	2.7607		53.9881	5.1538	2.8611
	52.971	4.9551	3.2823		60.2904	5.0693	3.1793		54.0841	5.1555	3.1221
	53.006	4.9478	3.2335		60.3254	5.0866	2.4689		54.1541	5.1444	3.2447
	53.041	4.9456	3.4151		60.3664	5.0764	2.7143		54.2021	5.1453	3.3927
	53.076	4.9439	3.3822		60.4084	5.0889	2.8698		54.2421	5.1522	3.0835
	53.11	4.9339	3.568		60.4484	5.0855	2.3878		54.3121	5.1445	3.3946
	53.145	4.9431	3.079		60.4884	5.0846	2.8875		54.3792	5.1369	3.576
	53.18	4.9547	2.7431		60.5254	5.0943	2.6908		54.4282	5.1518	2.8241
	53.215	4.9453	3.0435		60.5624	5.0877	2.6906		54.4932	5.1534	2.9417
	53.25	4.9518	2.8385		60.6014	5.0851	2.7582		54.5542	5.1554	2.8206
	53.284	4.9556	2.8482		60.6424	5.0806	2.9875		54.6192	5.1468	3.0968
	53.32	4.9506	3.0951		60.6835	5.0887	2.7479		54.6812	5.1506	2.8181
	53.3551	4.9477	3.0916		60.7205	5.084	2.9234		54.7262	5.1545	3.0958
	53.3891	4.9344	3.4712		60.7575	5.0729	3.3162		54.7972	5.1491	3.0173
	53.4241	4.9443	2.9739		60.7975	5.0753	3.1577		54.8682	5.1502	3.1005
	53.4581	4.9393	3.3625		60.8385	5.0808	2.9764		54.9122	5.1514	3.0596
	53.4931	4.9439	3.0684		60.8795	5.0865	2.7381		54.9502	5.1418	3.052
	53.5271	4.9399	3.3772		60.9155	5.0859	2.7016		54.9852	5.1537	2.5965
	53.5611	4.9455	3.1549		60.9645	5.0848	3.0259		55.0202	5.145	3.2316
	53.5961	4.9373	3.1836		61.0015	5.0953	2.794		55.0552	5.1497	2.9526
	53.6311	4.9351	3.1969		61.0425	5.0827	3.2534		55.0902	5.141	3.0914
	53.6651	4.9319	3.2034		61.0825	5.0767	3.0677		55.1252	5.1448	3.1212
	53.7001	4.9329	2.9762		61.1195	5.0785	3.0734		55.1602	5.1417	3.4367
	53.7341	4.9366	2.7245		61.1595	5.0711	3.1674		55.2042	5.1506	3.0177
	53.7691	4.9333	3.0868		61.2005	5.0707	2.9059		55.3142	5.1502	2.6595
	53.8041	4.9368	2.8171		61.2365	5.0849	2.8732		55.3722	5.1453	3.1352
	53.8391	4.9426	3.0166		61.2775	5.0931	2.8605		55.4212	5.1264	3.2844
	53.8741	4.9381	2.809		61.3145	5.09	2.7555		55.4592	5.1223	3.3662
	53.9091	4.9279	2.9503		61.3565	5.1012	2.5664		55.4952	5.1177	3.5944
	53.9431	4.9378	2.7638		61.3985	5.0964	2.921		55.5292	5.1109	3.5669
	53.9771	4.9433	2.9074		61.4355	5.0817	3.177		55.5642	5.1291	3.0638
	54.0121	4.9457	3.0415		61.4765	5.0919	2.7786		55.5982	5.1176	3.3125
	54.0461	4.9428	2.9474		61.5125	5.0887	3.0365		55.6332	5.1186	3.3687
	54.0811	4.9297	3.3665		61.5535	5.0845	3.1504		55.6682	5.1224	3.1614
	54.1161	4.9366	3.1018		61.5945	5.0732	3.767		55.7042	5.1279	3.1372
	54.1501	4.9435	2.9628		61.6355	5.0769	3.2565		55.7402	5.1383	2.8896
	54.1851	4.9372	3.1079		61.6725	5.0728	3.6309		55.7752	5.1296	3.0918
	54.2201	4.9369	3.1943		61.7095	5.0746	3.2964		55.8112	5.1246	3.5547
	54.2551	4.9439	2.8517		61.7495	5.0674	3.5637		55.8462	5.1255	3.0538
	54.2901	4.9354	3.1877		61.7905	5.0591	3.3339		55.8812	5.1287	3.2823
	54.3231	4.9489	2.7589		61.8315	5.0605	3.2898		55.9162	5.1298	2.8665
	54.3581	4.9326	3.2916		61.8725	5.0613	3.1305		55.9522	5.1204	3.1034
	54.3931	4.9304	2.8857		61.9075	5.0687	3.0736		55.9882	5.1174	3.2242
	54.4281	4.9312	3.0741		61.9475	5.0612	3.1379		56.0242	5.1147	3.2292
	54.4621	4.9435	2.693		61.9875	5.0735	2.8044		56.0602	5.1157	3.0218
	54.4971	4.9389	2.9736		62.0285	5.0655	2.9562		56.0942	5.1038	3.3421
	54.5311	4.9442	2.7481		62.0685	5.0656	3.2245		56.1293	5.116	2.9365
	54.5671	4.9312	3.3323		62.1035	5.0861	2.5045		56.1653	5.1148	2.8804
	54.6021	4.9275	3.2655		62.1455	5.0716	2.7872		56.2013	5.1148	2.9318
	54.6361	4.9252	3.3713		62.1865	5.081	2.701		56.2373	5.1207	2.8779
	54.6701	4.9249	3.4436		62.2275	5.0697	2.8684		56.2723	5.1205	2.8651
	54.7051	4.9322	3.0991		62.2685	5.0853	2.8005		56.3083	5.1204	3.0934
	54.7391	4.9219	3.3346		62.3045	5.0747	2.4963		56.3443	5.1221	2.7435
	54.7731	4.9219	3.2388		62.3405	5.081	2.8647		56.3803	5.1222	2.8941
	54.8071	4.9216	3.1478		62.3815	5.0806	2.7579		56.4143	5.12	2.9525
	54.8411	4.9205	2.8335		62.4225	5.0849	3.0498		56.4503	5.1377	2.6404
	54.8751	4.9335	2.6496		62.4636	5.0812	2.9088		56.4863	5.1171	3.0924
	54.9091	4.9282	2.6465		62.5056	5.0779	3.4186		56.5223	5.129	2.677
	54.9431	4.9275	2.6992		62.5436	5.0773	3.1519		56.5573	5.1177	2.7727
	54.9781	4.9311	2.7786		62.5796	5.0759	3.0738		56.5923	5.1292	2.9284
	55.0121	4.9268	3.1599		62.6216	5.0916	2.8057		56.6263	5.1274	2.8637
	55.0471	4.9342	2.6942		62.6626	5.0754	2.9507		56.6613	5.1199	2.9072
	55.0821	4.9325	2.6627		62.7036	5.0761	3.3988		56.6963	5.126	2.6977
	55.1172	4.9413	2.4198		62.7406	5.0785	2.8862		56.7323	5.1369	2.8222
	55.1512	4.9442	2.5844		62.7776	5.0719	3.0428		56.7683	5.1295	2.9099
	55.1862	4.9415	3.0475		62.8186	5.0721	3.2798		56.8033	5.1245	2.8311
	55.2212	4.9452	2.8444		62.8586	5.0838	3.0186		56.8383	5.1318	2.755
	55.2552	4.9456	2.5775		62.8986	5.0701	3.1471		56.8733	5.1364	2.7716
	55.2902	4.9419	2.9096		62.9356	5.07	3.2197		56.9093	5.1464	2.564
	55.3242	4.9539	2.7643		62.9756	5.0701	3.2467		56.9433	5.1417	2.7401
	55.3582	4.9564	2.4488		63.0126	5.0679	3.0938		56.9783	5.1462	2.9783
	55.3932	4.9625	2.5602		63.0526	5.0746	2.8954		57.0143	5.1385	3.0858
	55.4272	4.9616	2.6703		63.0936	5.0785	3.2223		57.0493	5.1334	3.1617
	55.4622	4.946	3.3279		63.1296	5.0672	2.9768		57.0843	5.1252	3.4202
	55.4982	4.9509	3.0005		63.1706	5.0676	2.8612		57.1193	5.1345	2.8756
	55.5332	4.9489	3.1904		63.2116	5.0692	3.0492		57.1553	5.1217	3.3669
	55.5682	4.9426	3.1552		63.2486	5.0621	2.9974		57.1913	5.1279	3.1328
	55.6032	4.9341	3.5318		63.2906	5.0581	3.142		57.2263	5.1305	3.2094
	55.6372	4.9312	3.5692		63.3276	5.062	3.3657		57.2613	5.1356	3.2632
	55.6712	4.9329	3.6922		63.3686	5.0603	3.1302		57.2963	5.1193	3.2473
	55.7052	4.9286	3.5754		63.4106	5.0603	3.3334		57.3303	5.1311	3.1825
	55.7392	4.9206	3.5936		63.4476	5.0674	2.8202		57.3663	5.1355	3.1734
	55.7732	4.9267	3.152		63.4896	5.0524	3.1212		57.4013	5.1325	3.4554
	55.8072	4.9303	3.0864		63.5256	5.0505	3.3135		57.4373	5.1231	3.3428
	55.8412	4.9397	2.6204		63.5666	5.0435	3.4067		57.4723	5.1153	3.631
	55.8762	4.9292	3.1398		63.6066	5.0533	2.9749		57.5073	5.1144	3.235
	55.9112	4.9317	2.9719		63.6466	5.045	3.4712		57.5413	5.1057	3.5492
	55.9452	4.9131	3.5676		63.6836	5.0374	3.0934		57.5763	5.115	3.2936
	55.9802	4.9196	3.2753		63.7196	5.041	2.9298		57.6113	5.1196	2.7529
	56.0152	4.9277	2.7561		63.7606	5.041	3.3284		57.6463	5.1113	3.0784
	56.0502	4.91	3.3308		63.8006	5.0394	3.2085		57.6823	5.1098	3.2622
	56.0842	4.9241	3.1612		63.8426	5.0371	3.1254		57.7173	5.1091	2.9753
	56.1192	4.9116	3.2804		63.8836	5.0467	2.9141		57.7523	5.1256	2.8254
	56.1532	4.9122	3.3186		63.9186	5.0425	2.984		57.7873	5.1186	2.8208
	56.1872	4.9165	3.0961		63.9596	5.0571	2.8174		57.8223	5.1198	2.8445
	56.2222	4.9079	3.3961		64.0006	5.052	3.2231		57.8574	5.1114	2.9762
	56.2572	4.9099	3.1752		64.0416	5.0565	2.7665		57.8924	5.1142	2.9881
	56.2912	4.8969	3.2416		64.0826	5.0603	3.1192		57.9264	5.1077	3.4578
	56.3262	4.914	3.017		64.1176	5.0528	2.8909		57.9624	5.112	2.868
	56.3602	4.9037	3.373		64.1586	5.0576	2.9039		57.9984	5.1113	2.9752
	56.3942	4.9077	3.2151		64.2007	5.055	3.0117		58.0334	5.1052	3.2243
	56.4292	4.9031	3.1287		64.2407	5.0644	2.6686		58.0684	5.1094	2.9917
	56.4642	4.9006	3.2179		64.2817	5.0599	2.9287		58.1034	5.1131	2.9473
	56.4992	4.9032	3.0718		64.3177	5.0627	2.6653		58.1384	5.1164	2.7298
	56.5342	4.911	2.9983		64.3537	5.0685	2.7337		58.1744	5.1231	2.6139
	56.5682	4.905	3.1483		64.3947	5.068	2.8843		58.2094	5.1256	2.6668
	56.6012	4.9057	3.1668		64.4357	5.066	2.9058		58.2434	5.1312	2.5214
	56.6362	4.898	3.3202		64.4767	5.0671	2.7768		58.2784	5.1246	2.6528
	56.6712	4.8951	3.0653		64.5137	5.066	2.7759		58.3144	5.1212	2.9429
	56.7062	4.9043	3.0085		64.5537	5.0607	3.2597		58.3484	5.1252	2.6765
	56.7402	4.906	2.7499		64.5907	5.0559	2.9191		58.3844	5.1326	2.3921
	56.7752	4.9082	2.8183		64.6317	5.0584	2.9083		58.4184	5.126	2.8665
	56.8092	4.917	2.5391		64.6727	5.0574	3.1652		58.4534	5.1316	2.6288
	56.8453	4.9079	2.8373		64.7087	5.0641	2.8133		58.4894	5.139	2.483
	56.8803	4.9143	2.5784		64.7527	5.0587	3.059		58.5244	5.1435	2.2833
	56.9153	4.9076	3.0806		64.7907	5.0731	2.7821		58.5604	5.1501	2.2588
	56.9493	4.9009	3.2423		64.8307	5.0592	2.9411		58.5964	5.1419	2.8833
	56.9843	4.9037	2.8969		64.8717	5.0501	3.2893		58.6304	5.1325	3.0204
	57.0193	4.9018	2.8997		64.9137	5.069	2.8767		58.6654	5.1407	2.8898
	57.0543	4.9092	2.8682		64.9497	5.0707	2.5977		58.7004	5.1467	2.8257
	57.0893	4.9067	2.9809		64.9917	5.0707	2.9785		58.7354	5.1405	3.0862
	57.1243	4.9069	2.9223		65.0287	5.0737	2.8845		58.7704	5.1458	3.1101
	57.1583	4.907	3.1334		65.0707	5.0753	2.8323		58.8064	5.1557	3.1017
	57.1933	4.9033	3.2574		65.1127	5.0598	3.1963		58.8414	5.1491	2.8554
	57.2283	4.8876	3.5247		65.1517	5.0745	2.7992		58.8774	5.1496	2.7492
	57.2633	4.9002	2.9583		65.1957	5.076	2.9043		58.9114	5.1459	2.9803
	57.2983	4.9063	3.2088		65.2377	5.0744	2.7472		58.9464	5.1483	3.0045
	57.3323	4.9003	3.2743		65.2757	5.0666	2.9965		58.9814	5.1441	3.1011
	57.3663	4.9118	2.9306		65.3177	5.0708	2.9141		59.0164	5.1357	3.3733
	57.4003	4.9074	3.0902		65.3547	5.0768	2.9311		59.0504	5.1479	2.9809
	57.4343	4.9142	2.6424		65.3967	5.0732	3.0382		59.0854	5.1427	2.6536
	57.4693	4.9136	2.8034		65.4407	5.0667	2.964		59.1204	5.1389	3.0974
	57.5033	4.9116	2.821		65.4787	5.0704	2.993		59.1564	5.1339	3.0437
	57.5373	4.9195	2.6471		65.5207	5.0673	2.9096		59.1904	5.1299	3.0192
	57.5723	4.9177	2.7813		65.5567	5.0666	3.1289		59.2254	5.1445	2.9052
	57.6073	4.9246	2.5896		65.5997	5.0733	2.7585		59.2614	5.1434	2.9471
	57.6413	4.9296	2.6776		65.6407	5.0599	3.2537		59.2954	5.1489	2.8725
	57.6763	4.9263	2.7535		65.6827	5.0575	2.8552		59.3304	5.1269	3.6283
	57.7113	4.9211	2.9872		65.7197	5.057	3.2629		59.3654	5.1285	3.478
	57.7463	4.925	2.8618		65.7567	5.0589	3.3932		59.4004	5.1438	3.1548
	57.7813	4.9234	2.8536		65.7987	5.0587	2.9212		59.4354	5.1233	3.5384
	57.8163	4.9294	2.8977		65.8417	5.0642	3.1309		59.4704	5.1262	3.343
	57.8513	4.9277	2.8382		65.8837	5.0681	3.0201		59.5054	5.1314	3.2734
	57.8853	4.9232	3.102		65.9218	5.071	2.8088		59.5404	5.1232	3.2966
	57.9203	4.9235	3.1292		65.9588	5.0638	3.2323		59.5764	5.1136	3.4691
	57.9543	4.9343	2.9031		65.9998	5.0649	2.9657		59.6115	5.1151	3.2255
	57.9893	4.9149	3.28		66.0408	5.0715	3.1029		59.6465	5.1307	2.8931
	58.0233	4.9205	2.9902		66.0828	5.0671	2.84		59.6815	5.1275	3.0218
	58.0583	4.9121	3.2045		66.1238	5.048	3.5212		59.7165	5.1255	2.8837
	58.0933	4.9172	2.9609		66.1588	5.0666	2.9098		59.7515	5.1283	2.7433
	58.1273	4.9206	2.962		66.2008	5.0637	3.0686		59.7865	5.1333	2.7505
	58.1623	4.9173	3.0713		66.2428	5.0573	3.2425		59.8225	5.1271	3.0594
	58.1963	4.9196	2.8374		66.2838	5.0592	2.843		59.8575	5.1247	2.7687
	58.2313	4.9293	2.6466		66.3258	5.0554	3.2738		59.8935	5.1332	2.7499
	58.2663	4.9244	2.6704		66.3628	5.0707	2.8545		59.9295	5.121	2.9442
	58.3003	4.9341	2.9451		66.3988	5.0687	2.6673		59.9645	5.1317	2.6705
	58.3343	4.9135	3.2091		66.4408	5.0662	2.968		59.9985	5.1311	2.7954
	58.3683	4.9178	3.3422		66.4828	5.0747	2.8766		60.0335	5.1282	3.0718
	58.4033	4.9321	2.7776		66.5228	5.0713	2.8167		60.0685	5.1311	2.8406
	58.4383	4.913	3.1679		66.5598	5.0606	3.2436		60.1035	5.1235	3.1137
	58.4723	4.9183	3.1831		66.5968	5.0739	2.899		60.1375	5.1194	3.2056
	58.5073	4.9199	3.2262		66.6378	5.0688	2.9311		60.1735	5.1124	3.3963
	58.5423	4.9211	2.8893		66.6788	5.066	3.1575		60.2095	5.1256	3.2412
	58.5773	4.9334	2.6063		66.7188	5.0734	2.6483		60.2445	5.1284	2.9746
	58.6124	4.9285	3.0762		66.7558	5.067	2.9303		60.2795	5.1293	2.8161
	58.6454	4.9251	2.9851		66.7968	5.0706	3.1828		60.3145	5.1379	2.8279
	58.6804	4.9114	3.2271		66.8338	5.0551	3.3035		60.3495	5.1332	3.1648
	58.7154	4.9064	3.357		66.8748	5.0692	2.8374		60.3845	5.1338	2.8811
	58.7504	4.9063	3.0667		66.9158	5.0695	3.1389		60.4195	5.1259	3.0619
	58.7854	4.91	3.1833		66.9528	5.0732	2.696		60.4545	5.1333	3.01
	58.8194	4.9086	2.8984		66.9948	5.077	2.7949		60.4895	5.124	3.1347
	58.8544	4.9106	2.8337		67.0358	5.0733	3.1762		60.5255	5.1359	2.7613
	58.8894	4.926	2.7079		67.0728	5.0792	2.5342		60.5605	5.1295	2.8482
	58.9234	4.9164	2.8084		67.1138	5.0694	3.0383		60.5965	5.1403	2.5332
	58.9574	4.9283	2.7659		67.1528	5.0751	2.9159		60.6315	5.1292	3.0936
	58.9924	4.9268	2.8172		67.1968	5.0763	2.8274		60.6665	5.1375	2.9388
	59.0274	4.922	2.9585		67.2408	5.0858	2.7706		60.7005	5.136	3.1258
	59.0614	4.9201	3.1257		67.2778	5.0779	3.2068		60.7355	5.1234	3.3896
	59.0954	4.9088	3.455		67.3188	5.0626	3.4917		60.7715	5.1352	2.9277
	59.1304	4.921	2.9382		67.3608	5.0569	3.179		60.8065	5.1294	2.9511
	59.1654	4.9024	3.2323		67.3978	5.0737	3.1571		60.8415	5.13	3.2623
	59.2004	4.9073	2.9581		67.4398	5.0619	3.1542		60.8765	5.1201	3.4954
	59.2354	4.9193	2.7353		67.4838	5.0566	3.5334		60.9115	5.1157	3.3836
	59.2694	4.9241	2.7183		67.5208	5.0517	3.0963		60.9465	5.1112	3.4539
	59.3054	4.9193	3.0055		67.5618	5.053	3.1071		60.9825	5.1051	3.5858
	59.3404	4.9248	2.9623		67.5988	5.0463	3.5466		61.0165	5.1051	3.5289
	59.3744	4.924	2.7672		67.6408	5.0352	3.8214		61.0525	5.1082	3.4009
	59.4094	4.9278	2.6997		67.6819	5.0485	3.3926		61.0875	5.1004	3.4664
	59.4434	4.9331	2.609		67.7229	5.0429	3.4956		61.1235	5.1037	3.4104
	59.4774	4.9364	2.6804		67.7599	5.0319	3.6168		61.1575	5.1002	3.1644
	59.5124	4.9317	2.6786		67.7959	5.0314	3.195		61.1935	5.1116	3.4176
	59.5474	4.9284	2.8241		67.8379	5.0247	3.494		61.2285	5.1101	3.0718
	59.5824	4.9222	3.1916		67.8829	5.0222	3.2502		61.2625	5.1103	3.0705
	59.6164	4.9218	3.3485		67.9229	5.0119	3.5531		61.2975	5.1033	3.0191
	59.6514	4.9307	2.8825		67.9619	5.0271	3.3685		61.3325	5.0893	3.3875
	59.6874	4.9234	3.1233		67.9989	5.0173	3.4446		61.3686	5.1023	2.9022
	59.7224	4.9252	2.993		68.0399	5.0182	3.6077		61.4026	5.1063	2.7067
	59.7564	4.9251	3.1342		68.0799	5.0129	3.2243		61.4376	5.1035	2.9303
	59.7914	4.9145	3.3662		68.1219	5.0122	3.3456		61.4726	5.102	3.0292
	59.8264	4.9098	3.5086		68.1619	5.0034	3.4603		61.5076	5.1097	2.8862
	59.8614	4.9097	3.4404		68.1969	5.0124	3.3256		61.5426	5.1144	3.1242
	59.8954	4.9097	3.4191		68.2379	5.0148	3.2904		61.5776	5.1069	3.1511
	59.9304	4.917	2.8766		68.2789	5.0181	2.7095		61.6126	5.1101	2.9652
	59.9654	4.9114	3.0425		68.3209	5.0197	3.0398		61.6476	5.1167	3.0585
	60.0004	4.9126	2.9924		68.3619	5.0133	2.8831		61.6826	5.1172	2.8995
	60.0354	4.9171	2.9016		68.3979	5.026	2.8837		61.7186	5.1212	2.6823
	60.0714	4.9081	3.2713		68.4349	5.0227	2.9306		61.7546	5.1227	2.8905
	60.1054	4.9099	3.1368		68.4759	5.0199	2.8497		61.7896	5.1234	2.7077
	60.1404	4.9065	3.3393		68.5169	5.0212	2.7686		61.8246	5.1311	2.6557
	60.1754	4.9014	3.2732		68.5579	5.0357	2.7031		61.8596	5.1317	2.6859
	60.2104	4.9142	3.0203		68.5939	5.0201	2.8068		61.8946	5.1277	2.6845
	60.2454	4.9085	3.0519		68.6309	5.0174	2.841		61.9296	5.1383	2.7446
	60.2804	4.898	3.179		68.6719	5.02	2.7865		61.9646	5.1429	2.5306
	60.3154	4.903	3.0362		68.7129	5.0216	3.1233		61.9996	5.1465	2.4447
	60.3505	4.9022	2.8944		68.7539	5.0236	2.8293		62.0346	5.1389	2.6302
	60.3865	4.9096	2.9381		68.7899	5.0253	3.1577		62.0706	5.136	2.8266
	60.4225	4.9019	3.2242		68.8299	5.0183	3.2288		62.1046	5.1314	2.8867
	60.4565	4.9164	2.7358		68.8669	5.0152	2.9859		62.1396	5.1284	2.9487
	60.4915	4.9112	2.844		68.9079	5.0169	2.807		62.1746	5.1394	2.7293
	60.5265	4.9056	3.1654		68.9489	5.0209	3.038		62.2096	5.1363	2.7599
	60.5615	4.9115	2.9401		68.9859	5.0284	2.878		62.2446	5.1358	3.1574
	60.5965	4.8979	3.2767		69.0269	5.0244	2.8799		62.2796	5.1419	2.8626
	60.6315	4.9118	3.0753		69.0689	5.0208	3.1501		62.3146	5.1318	3.1966
	60.6655	4.9042	3.1818		69.1059	5.0295	2.7097		62.3496	5.121	3.4574
	60.6995	4.9076	3.1299		69.1459	5.0166	3.0691		62.3856	5.1292	3.1219
	60.7335	4.9055	3.1168		69.1839	5.0173	3.0625		62.4206	5.132	3.0206
	60.7685	4.8968	3.1197		69.2249	5.0186	2.7149		62.4566	5.1237	3.3345
	60.8035	4.8868	3.664		69.2669	5.0175	3.2622		62.4906	5.1198	3.154
	60.8385	4.8916	3.2261		69.3029	5.0045	3.2306		62.5256	5.1259	2.9856
	60.8725	4.8908	3.3632		69.3439	5.0103	3.1287		62.5596	5.1212	3.0925
	60.9075	4.9042	2.9922		69.3809	5.0083	3.5082		62.5946	5.1209	2.9891
	60.9415	4.8833	3.3117		69.4209	5.0114	3.1286		62.6296	5.1218	2.9963
	60.9765	4.8837	3.2171		69.462	5.0216	2.6355		62.6646	5.1205	3.0107
	61.0115	4.8911	3.0362		69.504	5.0201	2.9575		62.7006	5.1168	2.9254
	61.0455	4.8772	3.243		69.54	5.0246	2.6386		62.7366	5.1226	3.0016
	61.0795	4.8913	2.7906		69.58	5.0151	2.7807		62.7706	5.1212	2.9288
	61.1135	4.8961	2.8465		69.618	5.0189	3.0993		62.8056	5.1198	3.0796
	61.1475	4.896	2.9369		69.658	5.0244	2.8932		62.8396	5.1245	2.8307
	61.1825	4.8952	3.0034		69.7	5.018	2.9479		62.8746	5.1203	3.0156
	61.2175	4.8986	2.8997		69.742	5.0202	2.9625		62.9096	5.1184	3.0066
	61.2525	4.898	2.8844		69.779	5.0354	2.686		62.9456	5.1138	3.0942
	61.2885	4.8906	3.0545		69.816	5.0306	2.8467		62.9796	5.1107	3.3125
	61.3225	4.8992	2.9103		69.856	5.0168	3.1402		63.0146	5.1169	3.1311
	61.3565	4.8969	3.0979		69.897	5.0208	2.8365		63.0506	5.1166	3.1663
	61.3905	4.9025	2.762		69.939	5.0212	2.9868		63.0856	5.1011	3.4855
	61.4245	4.8965	2.8368		69.976	5.0167	2.7836		63.1217	5.0939	3.4465
	61.4595	4.8868	3.1015		70.013	5.0237	2.8315		63.1557	5.1169	2.7784
	61.4935	4.9025	2.7151		70.053	5.0116	2.9901		63.1907	5.1176	2.6247
	61.5285	4.898	2.7154		70.094	5.0085	3.503		63.2257	5.116	2.9123
	61.5625	4.8978	3.0515		70.136	5.0118	2.6804		63.2607	5.1178	2.8365
	61.5965	4.8949	2.9842		70.177	5.0136	3.1406		63.2957	5.1212	2.7159
	61.6315	4.9083	2.6883		70.211	5.0219	2.7578		63.3307	5.1208	2.6732
	61.6665	4.9036	3.0201		70.254	5.0124	2.7998		63.3657	5.1211	2.7713
	61.7015	4.899	3.007		70.294	5.0204	3.0813		63.4007	5.1285	2.7033
	61.7365	4.8893	3.0771		70.336	5.0331	2.4953		63.4357	5.1263	2.7012
	61.7705	4.8772	3.8587		70.376	5.0325	2.9149		63.4707	5.1233	2.9064
	61.8055	4.8943	3.2654		70.413	5.0299	2.7184		63.5057	5.1259	2.9386
	61.8395	4.8943	2.9613		70.45	5.0271	2.9457		63.5407	5.1348	2.6662
	61.8745	4.8881	3.2567		70.49	5.023	3.0158		63.5757	5.1263	3.2214
	61.9085	4.881	3.4066		70.532	5.0279	3.1586		63.6107	5.1245	2.9157
	61.9435	4.8769	3.3795		70.574	5.0184	3.1471		63.6457	5.13	2.9742
	61.9785	4.8859	3.0939		70.61	5.0156	3.384		63.6807	5.1157	3.2831
	62.0125	4.8817	3.0212		70.647	5.0212	2.9638		63.7147	5.1173	3.204
	62.0475	4.8735	3.5008		70.688	5.0242	2.8721		63.7507	5.1309	2.7347
	62.0825	4.8841	2.7528		70.729	5.0177	2.9708		63.7857	5.1315	2.5466
	62.1166	4.8714	2.9913		70.77	5.0198	3.0451		63.8207	5.1396	2.3672
	62.1516	4.8729	3.062		70.806	5.0235	2.7725		63.8557	5.1394	2.6
	62.1866	4.8781	3.0208		70.848	5.0197	2.9592		63.8897	5.1329	2.7763
	62.2206	4.877	2.9204		70.884	5.0222	3.067		63.9247	5.1356	2.6094
	62.2546	4.8819	3.0032		70.925	5.0277	2.8239		63.9597	5.1396	2.5619
	62.2886	4.8714	3.0855		70.966	5.0175	3.1419		63.9947	5.1363	2.8643
	62.3236	4.8726	3.1337		71.003	5.0211	3.0656		64.0297	5.1479	2.6481
	62.3586	4.8654	3.3061		71.044	5.0357	2.6744		64.0647	5.1349	3.0685
	62.3926	4.8796	2.9826		71.086	5.0225	3.2997		64.1007	5.1417	2.9065
	62.4266	4.8824	2.7003		71.123	5.0281	2.8974		64.1347	5.1402	3.086
	62.4616	4.8843	2.4502		71.1651	5.0206	2.9019		64.1717	5.1302	3.0723
	62.4966	4.8823	3.0654		71.2021	5.0127	3.2716		64.2067	5.13	3.2623
	62.5326	4.886	2.862		71.2431	5.0254	2.8993		64.2417	5.1214	3.1762
	62.5666	4.8924	2.4996		71.2871	5.0254	2.7431		64.2777	5.1222	3.2229
	62.6016	4.892	2.6373		71.3231	5.0163	2.9902		64.3127	5.1314	2.9283
	62.6366	4.8919	2.7125		71.3651	5.017	2.9627		64.3487	5.1272	3.1946
	62.6716	4.8951	2.6723		71.4021	5.0227	2.9534		64.3827	5.1394	2.8063
	62.7056	4.8986	2.4665		71.4441	5.025	2.8631		64.4177	5.1291	3.1163
	62.7396	4.9	2.6702		71.4861	5.0369	2.4353		64.4527	5.1376	2.8719
	62.7736	4.8983	3.2312		71.5281	5.0263	2.9769		64.4877	5.1403	3.1598
	62.8076	4.9016	3.1682		71.5651	5.044	2.2656		64.5227	5.1376	2.8928
	62.8416	4.8966	3.1476		71.6021	5.0393	2.6224		64.5577	5.1384	2.8464
	62.8756	4.89	3.0357		71.6431	5.0466	2.9111		64.5927	5.1375	3.0607
	62.9096	4.8938	3.1706		71.6841	5.0532	2.8638		64.6277	5.1312	2.9496
	62.9436	4.8909	3.0575		71.7251	5.0462	2.8744		64.6627	5.1348	3.3266
	62.9796	4.8858	3.0882		71.7671	5.0338	2.8252		64.6987	5.1292	2.942
	63.0146	4.8874	3.0193		71.8011	5.0397	2.6654		64.7327	5.1256	3.1139
	63.0496	4.8831	3.1491		71.8411	5.0405	2.9892		64.7677	5.1277	3.1136
	63.0846	4.8737	3.4442		71.8821	5.046	2.8895		64.8027	5.129	3.0712
	63.1186	4.8903	2.8209		71.9231	5.0457	2.5449		64.8377	5.1186	3.5874
	63.1526	4.8827	2.8995		71.9641	5.045	3.1666		64.8728	5.1309	3.1497
	63.1866	4.88	2.9976		72.0011	5.0488	2.6319		64.9078	5.1183	3.4973
	63.2216	4.8846	3.0863		72.0381	5.0565	2.549		64.9428	5.1202	3.4739
	63.2556	4.8814	3.3466		72.0791	5.0697	2.4086		64.9778	5.122	3.1303
	63.2906	4.881	3.1159		72.1211	5.0583	2.8088		65.0128	5.1149	3.4747
	63.3256	4.8755	3.217		72.1621	5.0522	3.089		65.0478	5.1208	3.2615
	63.3606	4.8833	2.7939		72.2031	5.0537	2.8749		65.0828	5.1155	3.3636
	63.3956	4.8866	3.1541		72.2381	5.0627	2.5023		65.1178	5.1168	2.9522
	63.4306	4.8777	3.2675		72.2781	5.0566	2.8266		65.1528	5.1126	2.8973
	63.4646	4.8853	2.9217		72.3191	5.058	3.2895		65.1878	5.1205	2.7439
	63.4996	4.8984	2.4059		72.3601	5.0624	2.8944		65.2228	5.1172	3.1346
	63.5336	4.8919	2.8585		72.4021	5.056	3.3209		65.2578	5.1188	2.8972
	63.5676	4.886	2.9729		72.4371	5.0486	3.2575		65.2918	5.1159	3.0223
	63.6016	4.8876	2.911		72.4741	5.0661	2.6719		65.3268	5.1123	3.2206
	63.6356	4.8829	2.8441		72.5151	5.059	2.748		65.3618	5.1228	2.8229
	63.6706	4.8938	2.7368		72.5561	5.0587	3.2146		65.3968	5.1228	2.9409
	63.7056	4.8752	3.2885		72.5991	5.0497	3.2272		65.4318	5.1189	2.9294
	63.7406	4.8885	2.913		72.6361	5.0548	3.144		65.4668	5.1344	2.7864
	63.7746	4.8771	3.4738		72.6731	5.055	3.0904		65.5018	5.119	3.5157
	63.8086	4.8862	3.0457		72.7141	5.0495	3.1017		65.5368	5.1302	2.9087
	63.8447	4.891	2.9155		72.7541	5.0368	3.5214		65.5718	5.1155	3.2664
	63.8797	4.8976	2.6849		72.7951	5.036	3.2628		65.6068	5.1229	3.1078
	63.9147	4.9123	2.3773		72.8311	5.0387	3.304		65.6418	5.1131	3.3231
	63.9497	4.9026	2.7556		72.8701	5.0329	3.1891		65.6768	5.1173	3.2063
	63.9847	4.8906	3.1018		72.9071	5.0335	3.4312		65.7118	5.1141	3.0537
	64.0197	4.8964	2.879		72.9482	5.035	3.3496		65.7458	5.1125	3.1115
	64.0547	4.8949	2.9122		72.9892	5.0407	2.9874		65.7808	5.1029	2.9979
	64.0887	4.9086	2.4944		73.0272	5.041	3.2321		65.8158	5.1038	2.7315
	64.1237	4.9146	2.5441		73.0672	5.0385	2.9796		65.8508	5.1077	2.8822
	64.1597	4.9064	2.7729		73.1102	5.0269	2.8341		65.8858	5.1188	2.7818
	64.1947	4.9084	2.8116		73.1472	5.0422	3.1033		65.9208	5.107	2.9218
	64.2297	4.9084	2.7929		73.1882	5.0448	3.041		65.9558	5.1129	3.0519
	64.2637	4.9024	2.8303		73.2262	5.0406	3.0438		65.9908	5.1138	2.908
	64.2987	4.9088	2.7701		73.2672	5.0279	3.6081		66.0258	5.1169	2.8743
	64.3327	4.9034	3.1949		73.3122	5.0223	2.9795		66.0618	5.1169	3.0052
	64.3667	4.9071	2.8323		73.3492	5.0092	3.8467		66.0958	5.1098	3.1308
	64.4017	4.903	3.0499		73.3932	5.0053	3.573		66.1308	5.1089	3.1854
	64.4367	4.9088	3.0211		73.4292	5.0099	3.6441		66.1658	5.115	2.9405
	64.4707	4.9004	3.1691		73.4702	5.0141	3.3014		66.2008	5.1136	3.2946
	64.5057	4.9013	3.4366		73.5112	5.0112	3.0444		66.2358	5.1136	3.095
	64.5407	4.8993	3.2598		73.5522	5.0138	3.2818		66.2708	5.1218	2.749
	64.5757	4.8956	3.1932		73.5882	4.9963	3.3935		66.3058	5.1122	3.0796
	64.6107	4.9032	3.1283		73.6312	5.0037	3.0616		66.3408	5.1155	2.9334
	64.6457	4.9	2.9665		73.6722	4.9993	3.4867		66.3768	5.1142	3.2559
	64.6807	4.8875	3.2741		73.7132	5.0076	3.2492		66.4128	5.1202	2.8163
	64.7147	4.8802	3.2441		73.7542	5.0147	3.2851		66.4478	5.1094	3.0926
	64.7487	4.8911	3.2623		73.7962	5.0009	2.9754		66.4828	5.121	2.7164
	64.7827	4.8971	2.6856		73.8292	5.0056	3.1844		66.5178	5.1105	2.9371
	64.8177	4.8854	3.0349		73.8702	5.0006	3.2458		66.5528	5.1251	2.5843
	64.8517	4.8765	3.2195		73.9112	5.0091	2.7522		66.5878	5.1274	2.6071
	64.8867	4.885	2.7696		73.9522	5.0104	3.0195		66.6229	5.1268	2.8068
	64.9217	4.8816	2.9957		73.9932	5.0083	3.1348		66.6579	5.1321	2.4817
	64.9567	4.8831	2.9877		74.0272	4.9942	3.2283		66.6929	5.1306	2.8417
	64.9917	4.8854	3.151		74.0682	4.9895	3.2376		66.7279	5.1303	2.7354
	65.0267	4.8897	2.7845		74.1102	4.9996	2.9357		66.7629	5.124	3.1868
	65.0617	4.8987	2.9861		74.1502	4.9973	2.7372		66.7979	5.1166	3.097
	65.0967	4.8947	2.9563		74.1902	5.0117	2.8194		66.8329	5.1255	3.0344
	65.1317	4.9005	2.631		74.2272	5.016	2.396		66.8679	5.1276	3.3331
	65.1657	4.8985	3.0069		74.2632	5.017	2.3257		66.9019	5.119	3.0008
	65.1997	4.8996	3.3325		74.3042	5.0252	2.3945		66.9369	5.1234	3.1302
	65.2337	4.892	3.1257		74.3472	5.0126	3.2575		66.9719	5.1225	3.2261
	65.2687	4.8993	3.1036		74.3892	5.0222	2.8881		67.0069	5.1141	3.1518
	65.3027	4.9099	2.7887		74.4302	5.0229	2.9955		67.0419	5.1295	2.8042
	65.3377	4.9155	2.5521		74.4672	5.0262	3.0306		67.0769	5.1196	2.9238
	65.3737	4.9072	2.8417		74.5052	5.021	3.1473		67.1109	5.1242	2.8522
	65.4087	4.9094	2.9181		74.5472	5.0237	3.1953		67.1449	5.1201	2.9362
	65.4437	4.9071	3.0297		74.5882	5.0201	2.8935		67.1789	5.1174	3.0837
	65.4787	4.9124	2.8349		74.6312	5.0152	3.2637		67.2139	5.1225	2.9423
	65.5127	4.9154	2.7607		74.6673	5.0182	2.8836		67.2489	5.128	2.9542
	65.5477	4.9217	2.4702		74.7043	5.0122	3.1445		67.2839	5.1221	3.1668
	65.5817	4.9242	2.5124		74.7443	5.0145	3.2745		67.3189	5.1165	3.1206
	65.6168	4.9262	2.6213		74.7853	5.0175	3.1583		67.3539	5.1129	3.163
	65.6518	4.9208	2.7539		74.8263	5.0113	2.9105		67.3879	5.1218	2.9154
	65.6868	4.9155	3.1858		74.8623	5.0211	3.1408		67.4229	5.1317	2.9686
	65.7218	4.9171	2.8276		74.9033	5.0264	2.7984		67.4579	5.1378	2.4503
	65.7578	4.9164	3.01		74.9403	5.0143	2.8506		67.4929	5.1275	2.7619
	65.7928	4.9191	2.791		74.9813	5.013	2.9168		67.5279	5.1353	2.8323
	65.8278	4.9225	2.8725		75.0223	5.0168	2.8699		67.5619	5.1356	2.7962
	65.8628	4.9128	3.0838		75.0593	5.0164	2.7005		67.5969	5.1321	2.9592
	65.8978	4.9148	3.2484		75.1003	5.0024	3.2472		67.6319	5.1298	3.0161
	65.9318	4.9176	3.1056		75.1433	5.0103	3.0052		67.6669	5.1301	3.0761
	65.9658	4.92	3.1196		75.1793	5.0165	2.9784		67.7009	5.1396	2.7114
	66.0008	4.9175	2.9354		75.2213	5.0131	2.9846		67.7359	5.135	3.1596
	66.0348	4.9171	3.079		75.2583	5.0153	2.6676		67.7719	5.1246	3.2096
	66.0688	4.9128	3.1813		75.3003	5.0117	2.992		67.8069	5.1307	3.1252
	66.1038	4.9139	3.2245		75.3423	5.0147	3.1201		67.8419	5.1315	3.0272
	66.1388	4.9075	3.3258		75.3803	5.0023	3.1085		67.8769	5.1292	2.8847
	66.1738	4.9114	3.1781		75.4223	5.0132	3.1433		67.9119	5.124	3.3295
	66.2078	4.9138	2.9417		75.4593	5.0182	2.7989		67.9469	5.1307	2.7908
	66.2428	4.897	3.212		75.5013	5.0109	3.0566		67.9819	5.1268	2.6695
	66.2768	4.8962	3.2126		75.5423	5.0107	3.2169		68.0169	5.134	2.9551
	66.3118	4.9058	2.9702		75.5833	5.0113	2.8657		68.0519	5.1269	3.1373
	66.3458	4.8912	3.2375		75.6203	5.0254	2.8274		68.0869	5.12	3.2852
	66.3808	4.8988	3.1644		75.6583	5.0205	2.9313		68.1219	5.1202	2.9945
	66.4158	4.897	3.0259		75.7003	5.0273	2.4917		68.1569	5.1189	3.1446
	66.4498	4.8892	3.4902		75.7423	5.0179	2.9243		68.1929	5.1305	3.0071
	66.4848	4.8935	3.1428		75.7853	5.0351	2.2625		68.2279	5.1183	3.3277
	66.5198	4.8887	3.2305		75.8273	5.0331	3.0428		68.2629	5.1156	3.1323
	66.5548	4.8952	3.3993		75.8633	5.0272	2.587		68.2979	5.1217	2.9731
	66.5898	4.9004	2.8984		75.9053	5.0322	2.5848		68.3329	5.1262	3.0949
	66.6248	4.9001	3.1015		75.9463	5.0396	2.7254		68.368	5.1179	3.2723
	66.6598	4.8898	3.3257		75.9873	5.0365	2.737		68.403	5.1372	2.8674
	66.6938	4.8876	3.5494		76.0293	5.0451	2.6725		68.438	5.1195	3.2101
	66.7288	4.8897	3.1162		76.0643	5.0393	2.6404		68.473	5.1274	3.0728
	66.7628	4.8986	2.8662		76.1043	5.0401	2.8682		68.508	5.122	3.0611
	66.7968	4.895	3.0296		76.1463	5.0388	2.9868		68.543	5.1266	2.9694
	66.8308	4.8936	2.764		76.1883	5.0207	3.196		68.578	5.1313	2.8187
	66.8658	4.8912	3.0011		76.2293	5.0177	3.515		68.613	5.1303	2.7311
	66.9008	4.8849	3.0896		76.2663	5.031	2.7197		68.648	5.1379	2.6378
	66.9348	4.8824	3.364		76.3043	5.0348	3.2051		68.683	5.125	3.2053
	66.9698	4.8898	2.8721		76.3453	5.0274	3.1653		68.718	5.1278	2.9883
	67.0048	4.893	2.8314		76.3893	5.0307	2.8495		68.753	5.1264	3.204
	67.0408	4.8979	2.8293		76.4304	5.0402	2.9349		68.788	5.1274	3.1042
	67.0748	4.8838	3.2433		76.4684	5.0364	2.7679		68.823	5.1248	3.1846
	67.1088	4.8865	3.1567		76.5104	5.0441	2.5349		68.858	5.1084	3.5741
	67.1428	4.8939	3.068		76.5464	5.0239	3.4493		68.893	5.1098	3.4043
	67.1778	4.883	3.1162		76.5894	5.0428	2.8656		68.928	5.1068	3.5993
	67.2128	4.8815	3.1623		76.6294	5.0309	3.1785		68.963	5.0979	3.556
	67.2468	4.8827	2.8909		76.6674	5.0479	2.4957		68.998	5.0991	3.4943
	67.2808	4.888	3.1928		76.7084	5.0407	2.7058		69.033	5.1128	3.1113
	67.3158	4.8876	2.9663		76.7454	5.0283	3.5546		69.069	5.1037	3.2753
	67.3509	4.8859	2.9565		76.7874	5.0158	3.6586		69.104	5.0966	3.2914
	67.3859	4.8835	2.9369		76.8274	5.0258	2.7864		69.139	5.0994	3.0765
	67.4219	4.8876	2.7985		76.8684	5.039	3.0172		69.174	5.1123	2.9192
	67.4559	4.8851	2.9995		76.9054	5.0287	2.9244		69.209	5.1057	2.8883
	67.4909	4.8753	3.0085		76.9464	5.0357	2.9105		69.244	5.0941	3.0183
	67.5259	4.889	2.7872		76.9834	5.0294	2.9758		69.279	5.1089	2.5715
	67.5599	4.8703	2.9828		77.0244	5.0241	3.111		69.314	5.1082	2.6636
	67.5939	4.8808	2.6028		77.0664	5.0333	3.0422		69.349	5.0958	2.9034
	67.6289	4.8761	2.9913		77.1034	5.0331	2.8247		69.384	5.1015	2.7593
	67.6639	4.8788	2.9689		77.1434	5.0309	3.0309		69.419	5.1067	2.8377
	67.6979	4.8879	2.7289		77.1844	5.0345	2.7177		69.454	5.0963	3.1981
	67.7329	4.8876	2.6577		77.2214	5.0409	2.9629		69.489	5.1163	2.6753
	67.7669	4.8941	2.8379		77.2624	5.0337	2.628		69.524	5.0937	3.2793
	67.8009	4.891	3.0375		77.2994	5.0298	3.0801		69.559	5.1024	3.3464
	67.8359	4.8935	2.9914		77.3404	5.0346	2.8736		69.594	5.1026	3.2723
	67.8709	4.9028	2.5329		77.3804	5.0542	2.4753		69.629	5.1169	3.0261
	67.9059	4.9049	2.8695		77.4184	5.0511	2.7002		69.664	5.1072	3.1452
	67.9399	4.8927	3.0963		77.4594	5.0434	2.9932		69.699	5.1072	3.1043
	67.9749	4.898	3.0059		77.4954	5.0472	2.6975		69.734	5.1144	2.7842
	68.0099	4.8924	3.0436		77.5374	5.0471	2.86		69.77	5.1024	2.8545
	68.0449	4.877	3.2061		77.5784	5.0504	2.95		69.804	5.1055	3.0153
	68.0789	4.8783	3.109		77.6204	5.0477	2.7662		69.839	5.1198	2.6511
	68.1129	4.8726	3.4428		77.6574	5.043	3.2361		69.874	5.1072	2.9997
	68.1469	4.8736	3.1511		77.6944	5.0472	2.9878		69.909	5.1169	2.642
	68.1819	4.8851	2.8401		77.7344	5.0358	3.2023		69.944	5.1152	2.789
	68.2179	4.8688	3.4421		77.7754	5.0448	2.9059		69.978	5.115	2.8081
	68.2519	4.8758	2.9844		77.8164	5.0277	3.6812		70.013	5.1103	3.2542
	68.2869	4.8692	3.2461		77.8534	5.026	3.1239		70.048	5.1009	3.2403
	68.3219	4.8716	3.2226		77.8904	5.0371	2.8475		70.083	5.0998	3.1554
	68.3559	4.8674	3.354		77.9304	5.0267	3.0802		70.1191	5.1031	3.2406
	68.3909	4.8716	3.1547		77.9714	5.0306	3.2469		70.1531	5.101	3.1793
	68.4259	4.8754	3.0896		78.0134	5.0433	2.7296		70.1881	5.1089	3.1783
	68.4609	4.8813	2.8841		78.0544	5.0333	3.2645		70.2231	5.1117	3.0804
	68.4949	4.878	2.9661		78.0884	5.0287	2.8924		70.2581	5.1059	2.9893
	68.5299	4.8765	3.1544		78.1294	5.0279	2.9775		70.2931	5.0947	3.4626
	68.5649	4.8731	3.0713		78.1705	5.0312	3.2237		70.3281	5.0904	3.4681
	68.5999	4.8771	2.9731		78.2115	5.0244	3.1835		70.3631	5.0813	3.4453
	68.6349	4.8865	2.9255		78.2525	5.0339	3.0476		70.3981	5.0962	2.9989
	68.6699	4.8709	2.9008		78.2895	5.0339	3.1398		70.4321	5.1036	2.5758
	68.7039	4.8731	3.2163		78.3265	5.0271	3.2091		70.4661	5.1045	2.9001
	68.7389	4.8765	2.9463		78.3675	5.029	2.8825		70.5011	5.1	2.9751
	68.7729	4.8659	3.5004		78.4075	5.0312	3.1541		70.5361	5.0948	3.2506
	68.8079	4.8689	2.9362		78.4485	5.017	3.36		70.5701	5.1003	3.1781
	68.8419	4.8793	2.8265		78.4855	5.0216	3.1221		70.6051	5.0985	2.896
	68.8759	4.8738	2.9959		78.5225	5.0208	3.2268		70.6391	5.0992	3.0896
	68.9099	4.8655	3.0801		78.5625	5.019	2.9928		70.6741	5.0885	3.3312
	68.9439	4.871	3.0938		78.6035	5.0291	2.7458		70.7091	5.0886	3.1776
	68.9789	4.8669	3.5124		78.6455	5.0246	3.3205		70.7441	5.0862	3.1834
	69.0129	4.8787	2.9676		78.6825	5.0288	2.7349		70.7791	5.0771	3.3237
	69.0479	4.8779	3.0861		78.7245	5.0405	2.5285		70.8141	5.0809	3.0491
	69.083	4.8707	3.3253		78.7615	5.0291	3.1372		70.8491	5.0873	3.1239
	69.118	4.8745	3.0651		78.8035	5.0174	3.16		70.8841	5.0802	3.1211
	69.153	4.8897	2.7797		78.8445	5.0143	3.1431		70.9181	5.077	3.5095
	69.188	4.8931	2.8193		78.8815	5.0214	3.1228		70.9531	5.0841	3.2444
	69.222	4.8878	2.648		78.9215	5.0162	3.0898		70.9881	5.0849	2.9688
	69.257	4.8921	2.8055		78.9625	5.0234	2.8811		71.0241	5.0723	3.3182
	69.292	4.8905	2.7434		78.9995	5.0303	3.1426		71.0581	5.0737	3.1285
[truncated: 6,576 more rows]

## Sheet: Fig 1D
	[RecX], µM	Mean Average Length reduction rate, nm/s	SD	N
	0.2	0.82	0.19	4
	0.5	1.33	0.3	3
	1	2.06	0.32	8

## Sheet: Fig 1E
	[RecX], µM	Initial length reduction, nm	SD	N
	0.05	3.67	8.98	6
	0.2	54.8	7.22	6
	0.5	116	14.79	4
	1	144	18.92	8
