# Supplementary material for: A new insight into RecA filament regulation by RecX from the analysis of conformation-specific interactions
Source: eLife. 2022 Jun 22;11:e78409. doi: 10.7554/eLife.78409 (PMC9252578; doi:10.7554/eLife.78409)
Supplement: Figure 2—source data 1. [file elife-78409-fig2-data1.xlsx]

## Sheet: Fig 2B
	Time, s	Length, µm	Force, pN
	0	5.3237	3.0683
	0.034	5.3148	3.1917
	0.068	5.3472	2.3083
	0.102	5.3332	2.6023
	0.136	5.3449	2.5615
	0.17	5.3353	2.9371
	0.205	5.3465	2.6598
	0.238	5.3331	2.8911
	0.273	5.3431	2.7637
	0.308	5.3442	2.6344
	0.341	5.3418	2.6503
	0.376	5.3463	2.8225
	0.411	5.348	2.8554
	0.446	5.3479	2.9071
	0.481	5.348	2.7757
	0.515	5.3579	2.7666
	0.548	5.3563	2.8193
	0.582	5.3587	2.783
	0.616	5.3609	2.503
	0.6511	5.3559	2.9187
	0.6841	5.3589	3.0436
	0.7181	5.3569	3.1877
	0.7521	5.3621	3.065
	0.7861	5.3414	3.1422
	0.8211	5.3483	3.0816
	0.8551	5.3485	3.1268
	0.8901	5.3566	3.0521
	0.9251	5.3569	3.0411
	0.9601	5.344	3.4346
	0.9941	5.3371	3.6086
	1.0271	5.3502	3.0979
	1.0621	5.3372	3.2967
	1.0951	5.3403	3.2355
	1.1291	5.3455	3.0084
	1.1631	5.3491	3.0227
	1.1981	5.3539	3.1105
	1.2311	5.3408	3.2641
	1.2651	5.3393	3.0537
	1.2991	5.3372	2.982
	1.3341	5.3329	3.2283
	1.3671	5.3351	3.0736
	1.4011	5.3408	3.0886
	1.4361	5.3477	2.8157
	1.4701	5.339	3.0001
	1.5051	5.3362	2.8084
	1.5401	5.3419	2.6864
	1.5741	5.3433	2.6835
	1.6081	5.34	2.8531
	1.6431	5.3489	2.9336
	1.6771	5.3538	2.8186
	1.7111	5.3592	2.9633
	1.7451	5.3556	2.9826
	1.7811	5.3552	2.7267
	1.8151	5.3479	3.0968
	1.8491	5.3438	3.0877
	1.8831	5.3474	2.8403
	1.9171	5.3515	3.1582
	1.9511	5.3549	2.8749
	1.9851	5.3467	3.1717
	2.0191	5.3521	2.9018
	2.0541	5.3514	2.9282
	2.0871	5.3491	2.9054
	2.1211	5.3435	3.0923
	2.1561	5.3517	3.1854
	2.1891	5.348	3.1988
	2.2231	5.3432	3.1118
	2.2581	5.3367	3.1784
	2.2921	5.343	2.9805
	2.3271	5.3513	2.6439
	2.3682	5.3464	3.1515
	2.4062	5.3505	2.919
	2.4412	5.3436	3.1506
	2.4762	5.3417	3.1292
	2.5102	5.3392	3.1509
	2.5452	5.3392	3.0769
	2.5782	5.3492	2.6406
	2.6122	5.3425	2.8525
	2.6462	5.3394	3.2031
	2.6802	5.3372	3.1681
	2.7152	5.3323	3.1272
	2.7502	5.3415	3.0136
	2.7852	5.3408	2.9114
	2.8202	5.3495	2.5939
	2.8552	5.3529	2.6515
	2.8892	5.3526	2.6808
	2.9242	5.3591	2.5273
	2.9582	5.3505	2.697
	2.9922	5.3536	2.8899
	3.0272	5.3568	2.8997
	3.0612	5.359	2.8025
	3.0952	5.3554	2.8772
	3.1292	5.3529	2.9238
	3.1632	5.3528	2.8123
	3.1982	5.3577	2.8088
	3.2322	5.3529	3.1545
	3.2662	5.3557	2.9677
	3.3012	5.3532	3.1953
	3.3352	5.3536	3.1275
	3.3702	5.3616	2.8958
	3.4042	5.3539	2.8914
	3.4392	5.3617	2.7767
	3.4722	5.355	3.1039
	3.5072	5.3537	3.1535
	3.5412	5.3547	3.0658
	3.5752	5.3731	2.8832
	3.6092	5.3672	2.8985
	3.6432	5.3655	2.8218
	3.6782	5.3698	2.7497
	3.7122	5.3565	3.1408
	3.7462	5.3615	3.0171
	3.7802	5.362	3.0279
	3.8152	5.364	3.1818
	3.8492	5.3591	3.3022
	3.8842	5.3568	3.108
	3.9182	5.3593	2.9017
	3.9522	5.3467	3.1481
	3.9862	5.3498	3.0981
	4.0202	5.3546	2.951
	4.0532	5.3551	2.978
	4.0872	5.3541	3.1771
	4.1212	5.3536	2.932
	4.1563	5.3572	2.8668
	4.1903	5.3448	3.0054
	4.2243	5.3491	2.913
	4.2573	5.3583	2.7987
	4.2923	5.3634	2.9724
	4.3263	5.3729	2.6872
	4.3603	5.3779	2.7675
	4.3953	5.3742	2.6161
	4.4293	5.375	2.694
	4.4633	5.3683	2.9573
	4.4973	5.3661	3.0208
	4.5333	5.3583	3.0793
	4.5673	5.369	3.0915
	4.6013	5.3707	3.1062
	4.6353	5.367	3.2596
	4.6693	5.3666	3.0807
	4.7023	5.3683	2.7932
	4.7363	5.3556	3.108
	4.7703	5.3635	2.8758
	4.8043	5.3625	3.2557
	4.8393	5.3634	2.9737
	4.8733	5.3607	3.3634
	4.9083	5.3671	3.1189
	4.9433	5.3501	3.3066
	4.9763	5.3537	3.1277
	5.0113	5.3581	3.0194
	5.0453	5.3555	3.0327
	5.0803	5.3643	3.1121
	5.1133	5.3543	3.3281
	5.1483	5.3561	3.247
	5.1823	5.3514	3.2906
	5.2173	5.3613	2.7725
	5.2503	5.3552	2.8651
	5.2843	5.3527	2.9747
	5.3193	5.3531	3.0234
	5.3523	5.3532	3.1101
	5.3863	5.3576	3.0654
	5.4203	5.363	2.8919
	5.4543	5.3582	3.0639
	5.4893	5.362	2.5947
	5.5233	5.3616	2.8823
	5.5563	5.3628	2.8647
	5.5903	5.3594	3.0574
	5.6253	5.3544	3.2925
	5.6593	5.3537	3.0844
	5.6943	5.3548	2.9828
	5.7293	5.3606	2.9478
	5.7643	5.3604	2.8991
	5.7993	5.3563	2.9918
	5.8343	5.3568	3.0712
	5.8694	5.3594	2.9568
	5.9034	5.3582	2.6991
	5.9384	5.3548	3.1039
	5.9724	5.3517	3.1314
	6.0074	5.3541	3.2256
	6.0424	5.3522	3.1695
	6.0774	5.3463	3.183
	6.1114	5.3465	3.0953
	6.1444	5.3459	2.8816
	6.1784	5.3485	3.0542
	6.2134	5.3515	2.8148
	6.2464	5.3641	2.7589
	6.2804	5.3507	3.2394
	6.3144	5.3582	2.8986
	6.3494	5.3533	2.902
	6.3834	5.3439	3.1549
	6.4174	5.3497	3.1016
	6.4524	5.351	2.9389
	6.4864	5.3506	3.0261
	6.5204	5.3547	3.1181
	6.5554	5.3392	3.454
	6.5894	5.3501	3.0215
	6.6224	5.3536	2.8827
	6.6574	5.363	2.5689
	6.6914	5.3644	2.8479
	6.7264	5.3502	3.0565
	6.7614	5.3594	2.8387
	6.7954	5.3624	3.0222
	6.8294	5.3551	3.2295
	6.8634	5.3555	2.9817
	6.8984	5.3528	3.0503
	6.9324	5.3543	2.9258
	6.9654	5.3493	3.12
	7.0004	5.3592	2.8217
	7.0354	5.3498	3.2012
	7.0694	5.3505	3.0715
	7.1034	5.3541	3.0914
	7.1374	5.3545	2.9115
	7.1714	5.3521	3.089
	7.2064	5.345	3.1288
	7.2414	5.3604	2.9476
	7.2754	5.3483	2.9058
	7.3094	5.3479	3.0062
	7.3434	5.3479	3.1255
	7.3774	5.3531	2.9306
	7.4114	5.3473	3.1596
	7.4464	5.3507	3.0066
	7.4804	5.3496	3.1903
	7.5144	5.3376	3.221
	7.5494	5.3553	2.8016
	7.5834	5.3656	2.6575
	7.6175	5.3559	2.9011
	7.6515	5.3568	3.2267
	7.6855	5.3508	3.2801
	7.7205	5.3506	3.0212
	7.7545	5.3488	2.9999
	7.7895	5.349	2.9531
	7.8245	5.343	3.0941
	7.8585	5.3603	2.7522
	7.8935	5.3493	3.1264
	7.9265	5.335	3.3814
	7.9605	5.3478	3.1913
	7.9945	5.3533	2.8959
	8.0295	5.3445	2.9691
	8.0635	5.3435	3.0985
	8.0975	5.3472	3.033
	8.1325	5.3443	3.1562
	8.1665	5.3473	3.1614
	8.2005	5.339	3.3872
	8.2345	5.3364	3.3523
	8.2695	5.3418	3.0308
	8.3045	5.3281	3.1928
	8.3385	5.3368	2.9707
	8.3725	5.334	3.0887
	8.4075	5.3334	3.1668
	8.4415	5.332	3.2933
	8.4745	5.3354	3.2986
	8.5085	5.3305	3.1877
	8.5425	5.322	3.152
	8.5765	5.3403	2.7346
	8.6115	5.3327	2.9041
	8.6455	5.3398	2.851
	8.6795	5.3264	3.3038
	8.7135	5.3454	2.8216
	8.7475	5.346	2.9208
	8.7815	5.3443	2.7739
	8.8165	5.341	2.7496
	8.8495	5.337	2.9756
	8.8845	5.344	2.9481
	8.9195	5.3515	2.7158
	8.9545	5.3373	3.2802
	8.9895	5.3454	2.8802
	9.0235	5.3456	2.9842
	9.0565	5.336	3.0344
	9.0905	5.3422	2.9486
	9.1245	5.3384	3.062
	9.1595	5.3478	2.718
	9.1925	5.3448	3.1234
	9.2265	5.3334	3.3616
	9.2605	5.3406	3.1951
	9.2945	5.3345	3.032
	9.3295	5.3442	2.7605
	9.3645	5.3369	2.941
	9.3986	5.3365	2.9928
	9.4326	5.3326	3.1056
	9.4676	5.3339	3.2186
	9.5016	5.3313	3.1914
	9.5356	5.326	3.35
	9.5706	5.3265	3.2314
	9.6046	5.3233	2.9353
	9.6386	5.3251	3.0377
	9.6736	5.3297	3.0177
	9.7076	5.3204	3.3363
	9.7406	5.321	3.2096
	9.7746	5.3202	3.3094
	9.8086	5.3185	3.2958
	9.8426	5.3141	3.1459
	9.8766	5.3256	2.871
	9.9106	5.3178	2.9666
	9.9446	5.3261	2.8368
	9.9786	5.3224	3.1742
	10.0136	5.3251	2.9497
	10.0476	5.3219	3.0403
	10.0806	5.3278	2.9501
	10.1156	5.3296	2.6829
	10.1506	5.3256	2.8935
	10.1846	5.3197	3.2153
	10.2196	5.3189	3.3038
	10.2536	5.3111	3.353
	10.2876	5.3089	3.4313
	10.3226	5.3044	3.3607
	10.3556	5.3005	3.2152
	10.3896	5.3133	3.025
	10.4236	5.3027	3.1614
	10.4586	5.306	3.1187
	10.4926	5.3004	3.2214
	10.5256	5.3078	3.0795
	10.5596	5.3014	3.1142
	10.5946	5.3132	2.7206
	10.6286	5.3108	2.8761
	10.6616	5.318	2.618
	10.6956	5.3067	3.1569
	10.7306	5.3012	3.2082
	10.7646	5.3111	3.0324
	10.7996	5.3115	2.9958
	10.8346	5.3158	2.9451
	10.8696	5.3185	2.8452
	10.9026	5.3074	2.9645
	10.9366	5.3181	2.8317
	10.9706	5.3084	3.0533
	11.0056	5.3139	3.2378
	11.0396	5.317	2.7984
	11.0736	5.3114	3.0541
	11.1066	5.3249	2.692
	11.1407	5.3151	2.861
	11.1757	5.3148	2.9642
	11.2087	5.3208	2.9593
	11.2427	5.3265	2.9663
	11.2767	5.323	2.9937
	11.3107	5.3182	2.9772
	11.3457	5.3183	2.6579
	11.3807	5.3244	2.6364
	11.4157	5.331	2.5107
	11.4497	5.334	2.5767
	11.4847	5.3313	2.8296
	11.5177	5.3316	3.0913
	11.5527	5.3248	3.0068
	11.5857	5.3307	2.9578
	11.6207	5.3291	2.8621
	11.6547	5.3291	2.7271
	11.6887	5.3232	3.0399
	11.7227	5.3285	3.0305
	11.7557	5.3207	3.1862
	11.7897	5.3181	3.3052
	11.8247	5.3235	3.109
	11.8587	5.3163	3.0587
	11.8927	5.3226	2.8492
	11.9277	5.3357	2.7808
	11.9617	5.3372	2.8302
	11.9957	5.3318	2.8581
	12.0297	5.3331	3.0379
	12.0647	5.328	3.0698
	12.0987	5.3379	2.9206
	12.1327	5.3287	2.9734
	12.1677	5.3217	3.0899
	12.2007	5.3287	3.0864
	12.2347	5.3243	3.0793
	12.2687	5.3273	3.1456
	12.3027	5.3297	3.1373
	12.3387	5.3348	3.0327
	12.3737	5.3224	3.2772
	12.4087	5.3204	3.2166
	12.4437	5.3291	2.9249
	12.4787	5.3244	2.9104
	12.5137	5.3203	2.9424
	12.5477	5.323	2.9777
	12.5817	5.3214	2.9751
	12.6167	5.3278	2.9624
	12.6517	5.3295	2.881
	12.6867	5.3198	3.2472
	12.7197	5.32	3.2388
	12.7537	5.3223	2.9518
	12.7877	5.3168	2.7844
	12.8227	5.3189	2.7447
	12.8557	5.3156	3.1142
	12.8908	5.3273	3.0006
	12.9238	5.3202	3.1243
	12.9588	5.3265	3.0192
	12.9928	5.3146	3.1512
	13.0278	5.3306	2.7153
	13.0608	5.3308	2.7495
	13.0958	5.3298	3.0812
	13.1308	5.3283	2.8101
	13.1638	5.319	3.2392
	13.1978	5.3019	3.5991
	13.2318	5.314	3.1622
	13.2668	5.309	3.0656
	13.2998	5.3149	3.0125
	13.3338	5.305	3.231
	13.3678	5.3022	3.3281
	13.4028	5.307	3.2016
	13.4368	5.3118	3.0958
	13.4718	5.2946	3.2274
	13.5058	5.3056	2.9805
	13.5418	5.2991	3.0235
	13.5758	5.314	2.634
	13.6108	5.3103	2.8326
	13.6458	5.3092	2.8916
	13.6798	5.3142	2.922
	13.7148	5.3072	3.0618
	13.7498	5.3118	2.956
	13.7828	5.3153	3.0159
	13.8178	5.3117	2.8676
	13.8518	5.3256	2.6111
	13.8858	5.3234	2.9247
	13.9208	5.3268	2.7203
	13.9558	5.3237	2.7817
	13.9908	5.3317	2.6634
	14.0258	5.3328	2.9018
	14.0608	5.3312	2.9303
	14.0948	5.3311	2.9769
	14.1298	5.3242	3.1897
	14.1628	5.3348	2.8314
	14.1968	5.3244	2.7657
	14.2308	5.3257	2.8895
	14.2648	5.3305	2.9695
	14.2988	5.3229	3.1464
	14.3338	5.3298	3.0996
	14.3678	5.328	3.1565
	14.4018	5.3245	3.0738
	14.4358	5.3112	3.172
	14.4708	5.3222	2.9263
	14.5048	5.3263	3.0173
	14.5398	5.3408	2.8215
	14.5748	5.3251	3.1167
	14.6099	5.3249	3.2418
	14.6439	5.3152	3.339
	14.6779	5.3229	3.1161
	14.7129	5.3149	3.1774
	14.7469	5.3154	3.1597
	14.7809	5.3157	3.077
	14.8159	5.3153	3.0709
	14.8489	5.3068	3.3462
	14.8829	5.3094	3.1894
	14.9169	5.3061	3.2013
	14.9519	5.3082	3.155
	14.9859	5.3082	2.9636
	15.0199	5.3084	3.108
	15.0549	5.3201	2.7315
	15.0899	5.3036	3.1356
	15.1239	5.3031	3.2574
	15.1589	5.3127	3.1086
	15.1939	5.3077	3.1351
	15.2279	5.3135	2.8167
	15.2609	5.2948	3.2638
	15.2949	5.2967	3.1361
	15.3299	5.2993	3.1052
	15.3629	5.2973	3.1238
	15.3969	5.2928	3.3233
	15.4309	5.2985	3.164
	15.4659	5.2919	3.1974
	15.4999	5.2973	2.9617
	15.5329	5.3122	2.6568
	15.5679	5.2964	3.0406
	15.6029	5.31	2.7129
	15.6379	5.3019	3.0661
	15.6729	5.3097	2.876
	15.7079	5.3065	3.0311
	15.7419	5.3066	3.0348
	15.7759	5.2992	2.9509
	15.8109	5.2922	3.0749
	15.8449	5.3038	2.8428
	15.8779	5.2922	3.0449
	15.9119	5.3107	2.7423
	15.9459	5.3074	2.7845
	15.9799	5.3235	2.7085
	16.0139	5.3163	2.6636
	16.0479	5.3024	3.043
	16.0829	5.3072	2.9627
	16.1169	5.3055	3.0105
	16.1509	5.3129	2.9013
	16.1849	5.3077	3.052
	16.2189	5.3144	2.7836
	16.2529	5.3235	2.6116
	16.2859	5.3232	2.5308
	16.3219	5.3237	2.6326
	16.357	5.3253	2.6703
	16.39	5.3255	2.8884
	16.424	5.3381	2.9284
	16.458	5.3271	2.9696
	16.493	5.3323	2.8751
	16.527	5.3327	2.7324
	16.562	5.3404	2.546
	16.596	5.3338	2.7673
	16.63	5.3261	3.0423
	16.665	5.3206	3.0385
	16.7	5.3326	2.7036
	16.735	5.328	3.0335
	16.771	5.3319	3.0255
	16.804	5.3342	2.9519
	16.838	5.3393	2.7893
	16.872	5.3365	2.5861
	16.906	5.343	2.5435
	16.94	5.3393	2.9777
	16.974	5.3358	3.1042
	17.008	5.3334	3.0984
	17.042	5.3395	2.7263
	17.076	5.3429	2.8823
	17.111	5.3394	2.7741
	17.144	5.3331	2.8276
	17.179	5.3519	2.849
	17.212	5.3445	3.014
	17.246	5.3405	3.0628
	17.281	5.3418	3.1111
	17.316	5.3373	2.9764
	17.351	5.3513	2.5969
	17.385	5.345	2.7965
	17.419	5.3425	3.0225
	17.453	5.3365	3.1314
	17.486	5.346	3.3176
	17.52	5.3522	2.9049
	17.554	5.3474	2.7777
	17.588	5.3437	2.9667
	17.623	5.3574	2.728
	17.656	5.3517	2.9907
	17.69	5.3531	2.9851
	17.725	5.3561	2.9479
	17.759	5.3469	3.0986
	17.793	5.3582	2.843
	17.827	5.344	3.1549
	17.86	5.3412	3.0166
	17.894	5.3461	3.136
	17.929	5.3403	3.1874
	17.963	5.3357	3.3337
	17.997	5.3215	3.2856
	18.033	5.3326	3.2148
	18.067	5.3342	3.0398
	18.102	5.3381	2.7542
	18.1351	5.3468	2.7301
	18.1701	5.3449	2.8209
	18.2031	5.3447	3.1262
	18.2371	5.344	3.0584
	18.2711	5.3457	3.0474
	18.3051	5.3436	3.03
	18.3391	5.3432	2.7041
	18.3731	5.3497	2.7518
	18.4071	5.346	2.9409
	18.4411	5.3496	3.0968
	18.4751	5.3345	3.3921
	18.5091	5.3474	2.9575
	18.5431	5.3402	3.0829
	18.5771	5.3359	2.9476
	18.6111	5.3532	2.7203
	18.6451	5.3431	3.0295
	18.6801	5.3471	2.9162
	18.7151	5.3479	3.0092
	18.7501	5.3358	3.4573
	18.7841	5.3331	3.2049
	18.8181	5.342	2.9854
	18.8531	5.3277	3.1041
	18.8871	5.3337	2.8776
	18.9201	5.3412	3.0034
	18.9541	5.3345	3.1562
	18.9871	5.3363	3.0331
	19.0211	5.3333	3.068
	19.0551	5.3288	3.1117
	19.0891	5.3397	2.7239
	19.1231	5.335	2.9823
	19.1571	5.3401	3.0387
	19.1921	5.3371	3.027
	19.2251	5.3424	3.101
	19.2601	5.3359	3.1442
	19.2951	5.337	2.9744
	19.3301	5.3464	2.7034
	19.3651	5.3393	2.7966
	19.3991	5.3435	2.7915
	19.4321	5.3399	2.9476
	19.4661	5.3445	3.0282
	19.5001	5.3434	3.0523
	19.5341	5.3351	3.1394
	19.5681	5.335	3.094
	19.6021	5.3435	2.8959
	19.6361	5.3483	2.7747
	19.6701	5.3443	2.9641
	19.7041	5.3454	2.9528
	19.7381	5.3326	3.3904
	19.7731	5.3268	3.2695
	19.8081	5.3179	3.5388
	19.8431	5.3274	2.9433
	19.8772	5.3253	3.1069
	19.9112	5.3175	3.1471
	19.9452	5.3355	2.9834
	19.9802	5.3329	2.9935
	20.0132	5.3221	3.5948
	20.0472	5.3212	3.3138
	20.0822	5.3269	3.0106
	20.1162	5.3184	3.1026
	20.1502	5.3293	2.721
	20.1842	5.3332	2.6544
	20.2182	5.3283	2.963
	20.2532	5.3315	3.0491
	20.2872	5.3412	2.8453
	20.3222	5.3362	2.9418
	20.3572	5.3324	3.1376
	20.3922	5.3398	2.8353
	20.4272	5.3317	2.9682
	20.4612	5.3425	2.711
	20.4952	5.3413	2.7558
	20.5292	5.3389	2.8804
	20.5632	5.3375	3.1474
	20.5972	5.3354	3.0733
	20.6322	5.339	3.095
	20.6652	5.3298	3.2499
	20.7002	5.3341	3.1881
	20.7332	5.3277	3.0719
	20.7682	5.3201	3.3872
	20.8022	5.3189	3.5049
	20.8362	5.3207	3.5725
	20.8712	5.3164	3.3957
	20.9052	5.3102	3.4674
	20.9392	5.3189	3.2106
	20.9732	5.3123	3.1765
	21.0082	5.3011	3.2793
	21.0432	5.298	3.2598
	21.0782	5.3061	3.1378
	21.1122	5.3167	3.0673
	21.1452	5.3064	3.2072
	21.1802	5.3062	3.1625
	21.2142	5.3112	2.9482
	21.2482	5.3092	2.8033
	21.2812	5.3143	2.9217
	21.3152	5.3147	3.0081
	21.3502	5.3072	3.0786
	21.3842	5.3024	3.3984
	21.4192	5.2972	3.3417
	21.4532	5.297	3.1003
	21.4882	5.2971	3.0916
	21.5212	5.2953	3.1663
	21.5562	5.3008	2.9324
	21.5902	5.3	3.0898
	21.6243	5.296	3.2159
	21.6583	5.2897	3.2608
	21.6923	5.3062	2.7742
	21.7263	5.2922	2.6805
	21.7603	5.3024	2.6994
	21.7943	5.3086	2.6411
	21.8293	5.3125	2.6227
	21.8623	5.3018	2.8658
	21.8973	5.3093	2.8259
	21.9303	5.3118	2.9366
	21.9643	5.3229	2.6893
	21.9983	5.3174	2.6447
	22.0323	5.3269	2.4217
	22.0663	5.3152	2.8699
	22.1003	5.3154	2.8895
	22.1343	5.3199	2.8283
	22.1683	5.3205	2.6596
	22.2033	5.3277	2.7631
	22.2383	5.326	2.7913
	22.2713	5.314	3.0313
	22.3053	5.3276	2.8207
	22.3403	5.3276	2.7855
	22.3743	5.3227	2.9036
	22.4083	5.3198	3.096
	22.4423	5.3148	2.962
	22.4763	5.3312	2.6975
	22.5103	5.3269	2.9752
	22.5443	5.3237	2.9361
	22.5783	5.3233	3.0494
	22.6123	5.3223	3.146
	22.6463	5.3286	2.8996
	22.6813	5.3244	3.0687
	22.7153	5.3346	2.6694
	22.7493	5.3307	2.7003
	22.7843	5.3384	2.8597
	22.8193	5.3403	2.8367
	22.8543	5.3443	2.7634
	22.8893	5.3445	2.8982
	22.9243	5.3396	3.0755
	22.9593	5.3446	2.9345
	22.9933	5.3431	2.9642
	23.0273	5.3457	2.8264
	23.0623	5.3397	2.8952
	23.0963	5.3399	2.8853
	23.1313	5.3284	3.2588
	23.1643	5.333	3.0815
	23.1993	5.3386	3.1067
	23.2323	5.3273	3.3494
	23.2673	5.3226	3.5289
	23.3023	5.3233	3.254
	23.3363	5.3277	3.059
	23.3704	5.3252	3.1639
	23.4054	5.3214	3.296
	23.4384	5.3208	3.2732
	23.4724	5.3263	3.2669
	23.5064	5.3236	3.337
	23.5404	5.3299	3.0912
	23.5744	5.318	3.1824
	23.6084	5.3318	2.8197
	23.6424	5.3144	3.2721
	23.6764	5.3118	3.4943
	23.7104	5.3023	3.6697
	23.7444	5.3092	3.3536
	23.7784	5.3057	3.3352
	23.8124	5.3025	3.1876
	23.8474	5.2966	3.3468
	23.8814	5.2999	3.0563
	23.9164	5.3055	3.04
	23.9504	5.2979	3.1826
	23.9844	5.3161	2.9795
	24.0194	5.3019	3.1861
	24.0534	5.2917	3.0334
	24.0874	5.2985	3.0659
	24.1224	5.3076	2.7286
	24.1564	5.306	2.9042
	24.1914	5.3018	2.9605
	24.2244	5.3094	2.8171
	24.2594	5.3142	2.8688
	24.2934	5.3094	2.8849
	24.3284	5.3146	2.814
	24.3634	5.3146	2.7786
	24.3984	5.3129	2.9853
	24.4334	5.3086	2.953
	24.4684	5.3131	2.9223
	24.5034	5.3066	2.8815
	24.5364	5.318	3.0673
	24.5714	5.3234	2.9063
	24.6054	5.3197	2.8165
	24.6394	5.3175	3.0604
	24.6734	5.3209	3.0368
	24.7074	5.3233	2.6658
	24.7424	5.3105	3.0448
	24.7764	5.3204	2.7266
	24.8104	5.3141	2.8245
	24.8454	5.322	2.8422
	24.8794	5.3306	2.8817
	24.9144	5.3312	2.9282
	24.9494	5.3253	3.1235
	24.9844	5.3314	2.6366
	25.0174	5.3309	2.605
	25.0514	5.3315	2.6815
	25.0864	5.3327	2.7853
	25.1195	5.3339	2.8047
	25.1545	5.3354	2.8811
	25.1885	5.3244	3.2539
	25.2225	5.3196	3.268
	25.2555	5.327	3.2281
	25.2895	5.3205	3.0351
	25.3245	5.3133	3.2517
	25.3575	5.3182	3.2642
	25.3915	5.3185	3.184
	25.4265	5.3216	3.2569
	25.4605	5.3127	3.3106
	25.4955	5.3224	2.8823
	25.5315	5.3289	2.8896
	25.5665	5.3155	3.087
	25.6015	5.3287	2.5834
	25.6355	5.3322	2.5258
	25.6705	5.3069	3.1691
	25.7045	5.3212	2.8672
	25.7395	5.3249	2.9293
	25.7735	5.3348	2.5928
	25.8085	5.3298	2.7071
	25.8425	5.3335	2.751
	25.8775	5.3286	2.8617
	25.9135	5.3322	2.8853
	25.9485	5.3338	2.8827
	25.9835	5.3415	2.5911
	26.0185	5.3311	2.9985
	26.0525	5.3339	2.9252
	26.0865	5.3407	2.8766
	26.1205	5.336	2.9752
	26.1555	5.3392	3.1454
	26.1885	5.323	3.4803
	26.2225	5.3168	3.4169
	26.2575	5.3046	3.5252
	26.2905	5.316	3.2312
	26.3255	5.3209	3.2109
	26.3605	5.3151	3.0972
	26.3955	5.3022	3.5331
	26.4285	5.3052	3.303
	26.4625	5.3022	3.4615
	26.4975	5.2965	3.3651
	26.5315	5.2995	2.9709
	26.5665	5.3028	2.985
	26.6005	5.3099	2.9281
	26.6345	5.2988	3.1126
	26.6695	5.3044	3.0415
	26.7035	5.3009	3.108
	26.7385	5.3116	3.016
	26.7715	5.2928	3.1269
	26.8055	5.2903	3.081
	26.8405	5.2869	3.1793
	26.8746	5.3026	2.8534
	26.9106	5.2999	2.8177
	26.9466	5.3069	2.7528
	26.9806	5.3083	2.7494
	27.0156	5.3128	2.7041
	27.0506	5.3147	2.9271
	27.0846	5.3051	3.0027
	27.1196	5.3155	2.4647
	27.1536	5.3204	2.7998
	27.1876	5.3087	2.6107
	27.2226	5.3286	2.4704
	27.2566	5.3274	2.7506
	27.2906	5.3113	3.1072
	27.3246	5.3307	2.8616
	27.3596	5.3091	3.2574
	27.3946	5.3144	2.9785
	27.4286	5.3192	2.6796
	27.4626	5.3151	3.0008
	27.4976	5.3178	2.9907
	27.5316	5.3164	3.057
	27.5656	5.3119	3.2205
	27.6006	5.3155	3.1514
	27.6346	5.3099	3.1272
	27.6686	5.3137	3.15
	27.7026	5.3028	3.2544
	27.7366	5.3016	3.2152
	27.7706	5.3116	3.008
	27.8046	5.3009	3.3124
	27.8396	5.3094	3.2602
	27.8746	5.2978	3.1662
	27.9076	5.309	2.9142
	27.9426	5.305	3.081
	27.9776	5.298	3.2031
	28.0126	5.2889	3.0955
	28.0466	5.3014	2.9433
	28.0796	5.2945	3.143
	28.1146	5.2994	3.0163
	28.1486	5.293	3.2227
	28.1816	5.2868	3.0892
	28.2156	5.2916	3.1266
	28.2496	5.3014	2.8181
	28.2846	5.2987	2.7997
	28.3176	5.3041	2.8529
	28.3526	5.299	3.1076
	28.3866	5.2977	3.0669
	28.4216	5.3063	3.0103
	28.4566	5.3033	2.7503
	28.4916	5.3145	2.9027
	28.5256	5.3048	2.8886
	28.5606	5.3108	2.548
	28.5947	5.2958	3.1062
	28.6297	5.2846	3.4926
	28.6627	5.2993	3.0678
	28.6967	5.3043	3.1832
	28.7307	5.3067	2.8194
	28.7657	5.3012	2.9436
	28.7987	5.2935	2.9784
	28.8337	5.2957	3.0064
	28.8667	5.2963	3.0638
	28.9007	5.2889	3.2122
	28.9357	5.2901	3.3053
	28.9697	5.3012	3.1635
	29.0047	5.2932	3.1157
	29.0397	5.2871	3.1896
	29.0747	5.2963	2.8347
	29.1087	5.3057	2.7392
	29.1427	5.2985	2.9879
	29.1767	5.2954	3.1227
	29.2117	5.31	2.7556
	29.2457	5.3143	2.6836
	29.2797	5.2993	2.9467
	29.3127	5.3071	2.6655
	29.3477	5.3059	2.7299
	29.3827	5.3075	2.9903
	29.4167	5.3137	2.8978
	29.4527	5.3118	2.9654
	29.4877	5.3068	3.0116
	29.5227	5.3046	3.2312
	29.5577	5.2896	3.3377
	29.5907	5.2907	3.393
	29.6247	5.2936	2.8916
	29.6597	5.2949	3.0369
	29.6927	5.29	3.2092
	29.7267	5.2924	2.8971
	29.7607	5.2962	3.2053
	29.7957	5.2989	3.1547
	29.8287	5.2915	3.1841
	29.8627	5.2814	3.3181
	29.8977	5.2831	3.1353
	29.9307	5.2872	3.0036
	29.9657	5.2865	3.1432
	29.9997	5.2841	3.3202
	30.0347	5.2938	3.0856
	30.0697	5.284	3.1119
	30.1027	5.2844	3.1676
	30.1377	5.2916	2.8334
	30.1727	5.2912	2.9729
	30.2057	5.2831	2.9675
	30.2407	5.2836	3.0402
	30.2747	5.2954	2.7145
	30.3097	5.2941	2.9594
	30.3437	5.3067	2.6955
	30.3768	5.3077	2.7524
	30.4108	5.3148	2.388
	30.4448	5.3159	2.6208
	30.4798	5.3089	2.753
	30.5138	5.3071	3.0889
	30.5478	5.3134	3.0981
	30.5808	5.2997	3.0858
	30.6998	5.3136	2.69
	30.7348	5.309	2.8906
	30.7698	5.3128	2.7568
	30.8048	5.3143	2.7388
	30.8388	5.3215	2.6763
	30.8738	5.3285	2.7719
	30.9068	5.3222	2.9488
	30.9408	5.3248	2.9561
	30.9748	5.331	2.6658
	31.0098	5.3369	2.4812
	31.0438	5.3315	2.9185
	31.0778	5.3399	2.5388
	31.1128	5.3443	2.619
	31.1468	5.341	2.9197
	31.1798	5.3341	2.98
	31.2148	5.3402	2.8954
	31.2498	5.3414	3.0232
	31.2848	5.3385	2.7536
	31.3188	5.329	2.9766
	31.3538	5.3479	2.7102
	31.3878	5.3391	2.8891
	31.4228	5.3408	2.8747
	31.4568	5.3372	3.0459
	31.4898	5.3419	2.8727
	31.5238	5.3442	2.8717
	31.5588	5.3465	2.889
	31.5918	5.3479	2.6852
	31.6258	5.3417	2.81
	31.6598	5.3485	2.9961
	31.6938	5.3599	2.8786
	31.7278	5.3387	3.3202
	31.7628	5.3366	3.1995
	31.7968	5.3392	3.138
	31.8318	5.3425	2.911
	31.8668	5.3467	2.826
	31.9018	5.3546	2.758
	31.9348	5.3498	2.9146
	31.9688	5.3544	2.8868
	32.0038	5.351	3.2908
	32.0378	5.3389	3.3076
	32.0718	5.3502	2.9816
	32.1069	5.3341	3.2477
	32.1409	5.3361	3.0822
	32.1749	5.3316	3.2284
	32.2099	5.3462	2.8355
	32.2439	5.3439	3.0918
	32.2789	5.3368	3.0817
	32.3139	5.3298	3.4792
	32.3489	5.3387	3.3041
	32.3829	5.3294	3.2852
	32.4169	5.3322	2.9856
	32.4509	5.3324	3.0889
	32.4849	5.322	3.0855
	32.5189	5.3291	3.0868
	32.5539	5.3297	3.2099
	32.5879	5.3215	3.2853
	32.6209	5.3354	2.9206
	32.6559	5.3313	3.0412
	32.6899	5.3227	3.0674
	32.7229	5.3173	3.1089
	32.7569	5.3241	2.9689
	32.7919	5.3219	3.1754
	32.8269	5.3277	2.9231
	32.8619	5.3342	3.0689
	32.8959	5.3318	3.0194
	32.9299	5.3345	2.8175
	32.9649	5.3319	2.8909
	32.9979	5.3374	2.6641
	33.0319	5.3328	2.9959
	33.0669	5.3362	3.0575
	33.1009	5.3368	3.145
	33.1349	5.3425	2.9809
	33.1689	5.3358	3.0072
	33.2039	5.3374	3.0049
	33.2369	5.3302	2.9657
	33.2719	5.3238	3.0065
	33.3049	5.3307	3.1429
	33.3399	5.3176	3.2364
	33.3739	5.3278	3.218
	33.4089	5.3302	3.1354
	33.4439	5.3337	2.9975
	33.4779	5.3197	3.0904
	33.5129	5.323	3.1496
	33.5469	5.3302	2.8475
	33.5809	5.3185	2.9917
	33.6149	5.3251	3.0589
	33.6489	5.318	3.1453
	33.6839	5.3234	2.9574
	33.7189	5.3289	2.7374
	33.7529	5.34	2.7378
	33.7869	5.3359	2.6204
	33.8209	5.3398	2.5469
	33.854	5.3472	2.5883
	33.888	5.3517	2.6757
	33.922	5.3547	2.6872
	33.957	5.3441	2.9137
	33.991	5.3402	2.8484
	34.026	5.3449	2.6874
	34.061	5.3385	2.7693
	34.095	5.3485	2.7044
	34.13	5.3464	2.9658
	34.164	5.3463	2.9161
	34.199	5.3453	3.0434
	34.232	5.3446	2.9976
	34.266	5.3437	3.1073
	34.3	5.3387	2.9262
	34.335	5.3455	2.7743
	34.369	5.3408	3.0598
	34.403	5.3387	3.24
	34.438	5.3435	3.0759
	34.471	5.3353	3.2318
	34.506	5.3375	3.1545
	34.54	5.342	3.079
	34.575	5.3253	3.2687
	34.609	5.3362	3.0035
	34.644	5.3385	3.0078
	34.678	5.338	3.1627
	34.712	5.3359	3.1194
	34.745	5.3373	3.2502
	34.78	5.3252	3.3675
	34.815	5.3191	3.3318
	34.849	5.3265	3.1766
	34.884	5.3256	2.8723
	34.918	5.3211	3.0461
	34.952	5.3258	3.031
	34.986	5.3317	3.0581
	35.02	5.3283	2.9836
	35.054	5.3282	2.9795
	35.089	5.3194	3.0856
	35.124	5.3349	2.6843
	35.159	5.3254	2.9118
	35.194	5.3321	2.8818
	35.228	5.3409	2.7692
	35.262	5.336	2.9993
	35.296	5.3368	2.9271
	35.331	5.3257	3.1056
	35.365	5.3139	3.496
	35.398	5.3291	2.8197
	35.432	5.3305	2.9674
	35.467	5.325	3.0052
	35.501	5.3231	3.2329
	35.535	5.3255	3.2677
	35.57	5.3237	3.3094
	35.6051	5.3151	3.5195
	35.6401	5.3189	3.2899
	35.6751	5.3323	3.0274
	35.7091	5.3313	2.8491
	35.7421	5.3204	3.0775
	35.7771	5.3211	3.1503
	35.8101	5.3223	3.037
	35.8441	5.3334	2.9971
	35.8781	5.3132	3.2781
	35.9121	5.33	3.0788
	35.9461	5.3186	3.2589
	35.9801	5.3129	3.117
	36.0141	5.3164	2.8949
	36.0491	5.3193	2.9752
	36.0831	5.3181	3.1737
	36.1171	5.3236	3.0845
	36.1511	5.3157	3.1468
	36.1871	5.3136	3.0985
	36.2221	5.3151	2.8852
	36.2571	5.316	2.8706
	36.2911	5.3224	2.7216
	36.3261	5.3175	2.9731
	36.3601	5.3136	2.8884
	36.3951	5.3183	3.0238
	36.4291	5.3185	3.2138
	36.4631	5.3267	2.7369
	36.4981	5.3263	2.9003
	36.5331	5.3206	2.9356
	36.5671	5.3241	2.8845
	36.6011	5.3247	2.8932
	36.6361	5.3204	2.9824
	36.6701	5.3222	2.9402
	36.7051	5.3165	3.1111
	36.7391	5.3161	3.2275
	36.7731	5.3215	3.2192
	36.8081	5.3162	3.1983
	36.8421	5.3143	3.0796
	36.8771	5.3093	3.2019
	36.9111	5.3212	2.8142
	36.9451	5.3193	2.7775
	36.9801	5.3239	2.6999
	37.0141	5.3284	2.6912
	37.0481	5.3154	3.2784
	37.0831	5.3284	2.8982
	37.1181	5.3251	3.0879
	37.1521	5.3301	2.8095
	37.1871	5.3246	2.9767
	37.2221	5.3236	2.7489
	37.2551	5.3298	2.7467
	37.2891	5.3411	2.5851
	37.3241	5.341	2.7674
	37.3582	5.3431	2.7236
	37.3932	5.3363	3.0016
	37.4262	5.3274	3.0904
	37.4612	5.3286	3.0467
	37.4952	5.3184	3.0642
	37.5292	5.3249	2.9656
	37.5632	5.3247	3.012
	37.5972	5.3239	3.0566
	37.6322	5.3275	2.9899
	37.6662	5.3481	2.771
	37.7012	5.3281	3.0151
	37.7352	5.3225	3.1314
	37.7702	5.3241	3.1122
	37.8052	5.3364	2.7186
	37.8392	5.3309	3.0648
	37.8742	5.3274	3.1433
	37.9072	5.3316	2.9573
	37.9422	5.3261	3.2501
	37.9752	5.3312	2.8831
	38.0092	5.3293	3.0773
	38.0442	5.3355	2.6149
	38.0772	5.3338	2.9225
	38.1112	5.3395	2.8459
	38.1462	5.3451	2.7992
	38.1802	5.335	3.189
	38.2152	5.34	3.0019
	38.2502	5.3424	2.9516
	38.2842	5.3425	2.733
	38.3202	5.3346	3.0369
	38.3542	5.3381	2.8506
	38.3882	5.3454	2.6052
	38.4222	5.3441	2.8436
	38.4572	5.3483	2.7549
	38.4922	5.3421	3.0192
	38.5272	5.3463	2.9547
	38.5602	5.3458	3.1766
	38.5942	5.3445	3.0794
	38.6282	5.3413	2.9717
	38.6632	5.3331	3.1386
	38.6982	5.3303	3.1869
	38.7322	5.3355	3.1418
	38.7672	5.3273	2.9971
	38.8022	5.3363	3.0304
	38.8352	5.3339	3.1592
	38.8702	5.3392	2.9325
	38.9042	5.3413	2.8537
	38.9382	5.3421	2.8835
	38.9722	5.3378	3.0332
	39.0072	5.3414	3.0084
	39.0422	5.3217	3.4591
	39.0762	5.3253	3.2762
	39.1113	5.3259	3.2328
	39.1453	5.331	3.0906
	39.1803	5.3393	3.0047
	39.2143	5.3351	3.1211
	39.2493	5.3185	3.1285
	39.2843	5.3301	2.958
	39.3183	5.3277	2.9518
	39.3513	5.3232	3.1116
	39.3853	5.3218	3.0942
	39.4203	5.323	3.1843
	39.4543	5.3214	3.3049
	39.4893	5.3178	3.1012
	39.5223	5.3151	3.1831
	39.5573	5.3248	2.9988
	39.5913	5.3206	3.0113
	39.6253	5.3142	3.3587
	39.6603	5.3129	3.3173
	39.6943	5.3104	3.2392
	39.7293	5.3208	2.8834
	39.7643	5.312	3.2195
	39.7983	5.2991	3.3479
	39.8323	5.3067	3.0917
	39.8673	5.3034	3.1872
	39.9013	5.311	3.0241
	39.9353	5.2977	3.3437
	39.9693	5.3019	3.3829
	40.0033	5.3053	2.9525
	40.0383	5.3022	3.0451
	40.0723	5.2998	3.0732
	40.1063	5.2955	3.1158
	40.1403	5.3002	3.0473
	40.1743	5.2961	3.2088
	40.2103	5.2988	3.2739
	40.2453	5.3124	2.7657
	40.2803	5.3048	2.9361
	40.3153	5.2999	3.1431
	40.3483	5.2974	3.2269
	40.3823	5.2956	2.8636
	40.4163	5.289	3.1238
	40.4513	5.2935	2.8132
	40.4843	5.2878	3.2477
	40.5193	5.2853	3.2473
	40.5533	5.2903	3.2126
	40.5873	5.2868	3.0676
	40.6213	5.29	2.8182
	40.6553	5.2877	2.9808
	40.6903	5.2836	3.155
	40.7253	5.2952	2.8546
	40.7603	5.2868	3.0896
	40.7953	5.2958	2.707
	40.8293	5.295	3.0515
	40.8644	5.2953	2.9998
	40.8974	5.2952	2.8939
	40.9314	5.2859	2.7844
	40.9644	5.2826	3.118
	40.9984	5.2946	3.0382
	41.0334	5.2974	3.0439
	41.0664	5.3012	2.8489
	41.1004	5.2975	2.8335
	41.1344	5.3021	2.6946
	41.1694	5.2983	2.8937
	41.2034	5.291	3.248
	41.2384	5.295	2.8377
	41.2734	5.3023	2.9955
	41.3084	5.2936	3.1245
	41.3434	5.2994	3.0115
	41.3784	5.3101	2.8021
	41.4134	5.3022	3.252
	41.4474	5.2895	3.279
	41.4814	5.3094	2.8073
	41.5144	5.2923	3.0665
	41.5484	5.2952	2.9552
	41.5824	5.297	3.0603
	41.6164	5.3009	3.0779
	41.6504	5.2995	3.2237
	41.6844	5.2962	3.0988
	41.7184	5.2985	3.0079
	41.7524	5.2926	2.9629
	41.7874	5.2994	2.9225
	41.8214	5.2864	3.2983
	41.8554	5.2814	3.2047
	41.8904	5.293	3.2575
	41.9254	5.2808	3.4288
	41.9604	5.2909	2.966
	41.9944	5.2981	2.9665
	42.0284	5.2867	2.8864
	42.0624	5.2821	3.0497
	42.0964	5.2843	3.1966
	42.1304	5.2836	3.1312
	42.1654	5.2904	3.0392
	42.1994	5.2815	3.4078
	42.2334	5.2942	2.9655
	42.2684	5.283	3.175
	42.3034	5.2967	2.8613
	42.3384	5.2895	2.9364
	42.3734	5.2904	2.9345
	42.4084	5.2934	2.6683
	42.4424	5.2871	2.8904
	42.4774	5.2924	2.866
	42.5104	5.2924	3.0983
	42.5444	5.2925	3.0406
	42.5794	5.2908	3.1401
	42.6125	5.2931	2.8932
	42.6465	5.3034	2.6167
	42.6805	5.2948	2.9301
	42.7145	5.2878	2.9694
	42.7485	5.287	3.1124
	42.7835	5.2795	3.3392
	42.8175	5.2845	3.1354
	42.8515	5.2775	3.0828
	42.8865	5.2902	2.8394
	42.9215	5.2955	2.8397
	42.9565	5.2911	2.8952
	42.9905	5.2858	2.9715
	43.0255	5.29	3.0053
	43.0585	5.2993	2.8941
	43.0925	5.2945	3.0217
	43.1275	5.3069	2.793
	43.1615	5.3097	2.85
	43.1965	5.3051	2.7186
	43.2305	5.3067	2.656
	43.2655	5.3047	2.7491
	43.2995	5.3052	2.7242
	43.3345	5.2974	3.0062
	43.3685	5.3076	2.77
	43.4035	5.2975	3.0002
	43.4385	5.2977	3.176
	43.4725	5.3001	2.9164
	43.5065	5.3022	3.0393
	43.5405	5.3058	2.7622
	43.5755	5.3177	2.482
	43.6085	5.3215	2.5677
	43.6425	5.3179	2.7799
	43.6775	5.3211	2.7952
	43.7105	5.2956	3.2679
	43.7445	5.314	2.8502
	43.7785	5.3148	2.7246
	43.8135	5.3106	2.7826
	43.8465	5.3171	2.8704
	43.8815	5.3285	2.6953
	43.9145	5.3203	3.1002
	43.9485	5.322	2.9895
	43.9835	5.3273	3.0301
	44.0185	5.3222	2.8723
	44.0535	5.3164	3.1164
	44.0885	5.3221	2.9422
	44.1215	5.3218	2.8639
	44.1565	5.3163	2.9719
	44.1895	5.3055	3.1899
	44.2245	5.3103	3.3554
	44.2595	5.3075	3.24
	44.2935	5.3146	3.1217
	44.3275	5.3159	2.997
	44.3626	5.3147	2.8159
	44.3966	5.3117	2.8311
	44.4296	5.3093	3.0151
	44.4636	5.3222	3.0273
	44.4976	5.3172	2.9705
	44.5326	5.3167	3.1774
	44.5676	5.3127	2.9644
	44.6026	5.3168	2.9194
	44.6366	5.3098	3.1432
	44.6706	5.3211	2.7197
	44.7046	5.3112	2.9329
	44.7386	5.3178	2.9135
	44.7726	5.3127	3.2579
	44.8066	5.3021	3.2628
	44.8416	5.3055	3.1746
	44.8756	5.3066	3.0698
	44.9096	5.3194	2.7679
	44.9446	5.3211	2.6921
	44.9776	5.3289	2.6566
	45.0126	5.3207	2.9028
	45.0476	5.326	2.7842
	45.0826	5.3198	3.0031
	45.1166	5.3195	3.133
	45.1516	5.3125	3.2168
	45.1856	5.3142	3.0154
	45.2206	5.323	2.8174
	45.2536	5.3181	2.9085
	45.2876	5.3224	2.8634
	45.3236	5.3227	2.9662
	45.3586	5.3209	2.9074
	45.3936	5.3216	3.0031
	45.4276	5.3248	2.9209
	45.4626	5.3204	3.0711
	45.4966	5.3268	3.1056
	45.5316	5.3244	3.1911
	45.5666	5.334	2.783
	45.6016	5.3185	3.089
	45.6356	5.3137	3.2706
	45.6686	5.3115	3.1797
	45.7026	5.3185	2.9813
	45.7376	5.3168	3.1413
	45.7726	5.3152	3.3793
	45.8056	5.2989	3.6032
	45.8406	5.3019	3.3022
	45.8746	5.3059	3.0195
	45.9086	5.3077	3.0106
	45.9436	5.3107	2.8807
	45.9776	5.3088	2.8571
	46.0126	5.304	3.1092
	46.0476	5.3157	2.8865
	46.0807	5.3136	3.0764
	46.1157	5.3077	3.3159
	46.1497	5.3119	3.1327
	46.1837	5.3039	3.0558
	46.2187	5.3013	3.1602
	46.2517	5.3159	2.9318
	46.2857	5.3099	3.1923
	46.3207	5.3002	3.2226
	46.3547	5.3024	3.0718
	46.3887	5.3019	3.125
	46.4227	5.2859	3.4158
	46.4577	5.2899	3.3245
	46.4907	5.3036	2.8906
	46.5257	5.2923	2.9573
	46.5587	5.2939	3.071
	46.5927	5.2932	3.1141
	46.6277	5.299	3.0438
	46.6627	5.2966	3.0052
	46.6967	5.2853	3.0954
	46.7317	5.302	2.9503
	46.7657	5.2925	2.7956
	46.7997	5.2938	2.788
	46.8337	5.3001	2.8261
	46.8677	5.3018	3.096
	46.9017	5.3048	3.0513
	46.9367	5.3114	2.7931
	46.9717	5.3081	2.7628
	47.0067	5.3098	2.8024
	47.0407	5.3005	2.9091
	47.0757	5.3086	2.655
	47.1097	5.301	3.1028
	47.1437	5.2994	2.9359
	47.1787	5.309	2.9851
	47.2127	5.3056	2.976
	47.2477	5.3184	2.9852
	47.2807	5.3073	3.0431
	47.3147	5.3024	2.9625
	47.3497	5.3019	2.9617
	47.3827	5.3061	2.9632
	47.4167	5.3078	3.0402
	47.4507	5.3067	3.1682
	47.4847	5.3136	2.8642
	47.5187	5.302	3.0397
	47.5527	5.3086	2.863
	47.5867	5.2998	3.0472
	47.6207	5.3078	3.0932
	47.6557	5.3066	3.0658
	47.6897	5.3063	3.0328
	47.7247	5.3085	3.0171
	47.7597	5.3007	3.3234
	47.7937	5.3101	2.6618
	47.8268	5.3143	2.5173
	47.8618	5.3162	2.4267
	47.8958	5.3162	2.8834
	47.9298	5.3216	2.8489
	47.9638	5.3078	3.1109
	47.9988	5.308	3.0024
	48.0318	5.3295	2.5682
	48.0658	5.322	2.6356
	48.0998	5.3112	3.0594
	48.1338	5.3173	3.1244
	48.1688	5.3073	3.1889
	48.2038	5.3041	3.3263
	48.2378	5.312	2.993
	48.2718	5.3152	2.872
	48.3058	5.3194	2.8898
	48.3408	5.3189	2.9271
	48.3758	5.3189	3.0018
	48.4108	5.3271	2.7413
	48.4448	5.3168	3.2191
	48.4788	5.3031	3.3865
	48.5138	5.3045	3.3111
	48.5478	5.316	2.8857
	48.5808	5.3117	2.6681
	48.6158	5.3138	2.9853
	48.6498	5.3196	3.0542
	48.6838	5.3209	3.0548
	48.7178	5.3167	3.0703
	48.7518	5.3173	3.0999
	48.7858	5.3164	2.7454
	48.8198	5.3191	3.039
	48.8548	5.3175	2.94
	48.8888	5.3227	2.9199
	48.9238	5.3103	3.0543
	48.9578	5.3122	3.1614
	48.9908	5.3135	2.974
	49.0258	5.3138	3.1493
	49.0608	5.3273	2.8471
	49.0938	5.3189	2.8437
	49.1278	5.3168	3.0361
	49.1618	5.317	3.1498
	49.1958	5.3097	3.4381
	49.2298	5.3009	3.4628
	49.2638	5.3157	3.0379
	49.2978	5.3062	3.0656
	49.3328	5.3078	3.0397
	49.3658	5.2951	3.4751
	49.4008	5.3047	3.1254
	49.4358	5.3051	3.1099
	49.4698	5.3039	3.2138
	49.5038	5.3009	2.9978
	49.5378	5.303	3.0029
	49.5718	5.3085	2.7827
	49.6069	5.2959	3.3888
	49.6409	5.3014	2.9111
	49.6759	5.2995	3.0791
	49.7089	5.2954	3.2877
	49.7429	5.2904	3.3126
	49.7779	5.2835	3.2205
	49.8119	5.2948	2.7171
	49.8449	5.2917	2.9935
	49.8789	5.3006	3.1117
	49.9139	5.3033	2.9868
	49.9479	5.2981	3.0756
	49.9819	5.3056	2.6983
	50.0159	5.2927	3.2388
	50.0939	5.2905	2.9867
	50.1289	5.2936	3.1726
	50.1629	5.2885	3.1884
	50.1979	5.2897	3.1187
	50.2309	5.2845	2.9435
	50.2649	5.2969	2.714
	50.2999	5.2974	2.7972
	50.3339	5.2887	2.8659
	50.3689	5.3043	2.8643
	50.4039	5.3028	2.6945
	50.4389	5.3037	2.8297
	50.4739	5.3157	2.712
	50.5069	5.307	2.8861
	50.5419	5.3072	2.8155
	50.5759	5.3097	2.6357
	50.6099	5.3035	2.7422
	50.6439	5.3155	2.722
	50.6779	5.3103	2.8115
	50.7119	5.3068	2.9948
	50.7469	5.3079	2.9799
	50.7809	5.3169	2.7133
	50.8149	5.3178	2.7863
	50.8499	5.3203	2.7583
	50.8839	5.3173	3.1258
	50.9189	5.3214	2.9349
	50.9529	5.3301	2.8769
	50.9869	5.322	2.9532
	51.0219	5.3215	3.091
	51.0559	5.327	2.7755
	51.0889	5.3279	2.7461
	51.1229	5.3267	2.6316
	51.1569	5.3348	2.7061
	51.1909	5.3275	2.9862
	51.2249	5.3321	2.9575
	51.2599	5.3295	2.9926
	51.2929	5.3266	2.8905
	51.327	5.3247	2.8672
	51.362	5.3235	2.9779
	51.395	5.3372	2.909
	51.43	5.3337	2.9474
	51.465	5.3352	2.9701
	51.501	5.3232	3.1891
	51.535	5.323	3.138
	51.568	5.3194	3.1499
	51.603	5.3319	2.8944
	51.637	5.325	2.8659
	51.67	5.3236	3.2747
	51.704	5.3229	3.2103
	51.738	5.3207	3.0726
	51.772	5.3213	3.0179
	51.805	5.3281	2.6548
	51.84	5.3331	2.8429
	51.873	5.3239	3.0401
	51.907	5.3315	3.0295
	51.941	5.3229	3.0143
	51.975	5.3294	2.8745
	52.009	5.3313	2.8534
	52.043	5.3246	2.9197
	52.078	5.3341	2.8809
	52.111	5.3285	3.0475
	52.145	5.3298	3.0133
	52.179	5.3325	2.9824
	52.214	5.326	3.0531
	52.249	5.3224	2.9421
	52.283	5.318	3.1245
	52.318	5.3256	3.0078
	52.352	5.3281	2.993
	52.385	5.3232	3.019
	52.419	5.3289	3.0688
	52.453	5.33	2.8701
	52.488	5.3229	3.0806
	52.523	5.3139	2.8159
	52.557	5.3183	3.0583
	52.59	5.3139	3.423
	52.625	5.3153	3.4134
	52.66	5.3161	3.329
	52.694	5.3094	3.4676
	52.729	5.303	3.3771
	52.764	5.3039	3.387
	52.798	5.3053	3.0657
	52.832	5.2982	3.1774
	52.866	5.3039	3.1951
	52.9	5.3052	3.2201
	52.934	5.3066	3.1915
	52.969	5.306	3.0979
	53.002	5.3095	2.9804
	53.036	5.3067	2.8824
	53.0701	5.296	3.0502
	53.1051	5.3186	2.7003
	53.1391	5.3005	3.3443
	53.1741	5.3085	3.0464
	53.2071	5.3005	3.1147
	53.2421	5.2922	3.1254
	53.2761	5.307	2.9679
	53.3111	5.3059	2.8934
	53.3461	5.3001	2.9927
	53.3811	5.2984	3.1823
	53.4151	5.3056	2.9173
	53.4491	5.3019	3.1725
	53.4831	5.3057	3.003
	53.5181	5.2968	3.2479
	53.5511	5.2918	3.1208
	53.5861	5.2971	2.7723
	53.6201	5.2932	3.2858
	53.6531	5.2988	3.1394
	53.6881	5.2912	3.3285
	53.7211	5.2849	3.3017
	53.7551	5.2844	3.1396
	53.7891	5.2875	3.0699
	53.8231	5.2833	3.3143
	53.8571	5.2813	3.4433
	53.8911	5.2869	3.093
	53.9251	5.2804	3.1799
	53.9601	5.2839	3.011
	53.9941	5.2916	2.8533
	54.0291	5.2812	3.0062
	54.0631	5.2853	3.0074
	54.0971	5.2775	3.0009
	54.1311	5.2851	2.9958
	54.1661	5.2859	3.1487
	54.2001	5.2778	3.0943
	54.2331	5.2844	2.775
	54.2671	5.2818	2.8457
	54.3011	5.2928	2.7598
	54.3361	5.2887	3.0155
	54.3711	5.2956	2.9256
	54.4051	5.2947	3.0675
	54.4381	5.3017	2.7611
	54.4721	5.2911	2.8556
	54.5061	5.2917	2.9176
	54.5411	5.2977	2.9155
	54.5761	5.2906	3.0849
	54.6101	5.2996	2.8821
	54.6451	5.3027	2.9291
	54.6791	5.2978	3.0861
	54.7141	5.2942	2.8845
	54.7471	5.304	2.6115
	54.7821	5.3006	2.8136
	54.8151	5.3132	2.7396
	54.8492	5.2962	3.0796
	54.8842	5.3052	3.0238
	54.9182	5.3066	2.9163
	54.9522	5.2968	3.0206
	54.9862	5.3002	2.8871
	55.0212	5.3066	2.8457
	55.0562	5.3108	2.7869
	55.0902	5.3098	2.9652
	55.1252	5.3002	3.0571
	55.1602	5.3024	3.157
	55.1942	5.3157	2.6806
	55.2282	5.3054	2.9611
	55.2622	5.3146	2.8391
	55.2972	5.3059	2.8538
	55.3322	5.3064	2.8478
	55.3662	5.3094	2.8519
	55.3992	5.3017	3.1845
	55.4332	5.3127	2.9175
	55.4672	5.3122	3.0709
	55.5022	5.3093	2.7637
	55.5362	5.2994	3.0742
	55.5712	5.2988	3.0217
	55.6062	5.3003	3.1922
	55.6412	5.3057	2.9876
	55.6752	5.3158	2.9821
	55.7102	5.3243	2.7845
	55.7452	5.3223	2.9431
	55.7782	5.3153	2.902
	55.8122	5.3127	2.8164
	55.8472	5.3086	2.9895
	55.8812	5.3056	2.99
	55.9152	5.3161	2.9045
	55.9492	5.3092	3.0567
	55.9842	5.3237	2.9634
	56.0172	5.3092	3.22
	56.0522	5.3083	3.0286
	56.0862	5.3065	2.9638
	56.1212	5.3117	3.0144
	56.1562	5.3013	3.0893
	56.1912	5.2984	2.9995
	56.2262	5.3017	3.1213
	56.2592	5.3086	3.3369
	56.2932	5.3058	3.1103
	56.3282	5.291	3.3494
	56.3622	5.3037	3.034
	56.3962	5.295	2.9585
	56.4302	5.288	3.0659
	56.4642	5.2935	3.0725
	56.4982	5.2954	3.2493
	56.5322	5.2994	2.9331
	56.5662	5.296	3.0369
	56.6013	5.2984	2.8922
	56.6363	5.2951	2.9293
	56.6713	5.2884	3.1752
	56.7063	5.29	3.0823
	56.7413	5.2985	3.1574
	56.7753	5.2877	3.3843
	56.8093	5.2774	3.4811
	56.8423	5.286	3.3344
	56.8773	5.2806	3.0394
	56.9103	5.2825	3.0501
	56.9443	5.2818	2.9888
	56.9783	5.2901	2.9426
	57.0133	5.2853	2.9759
	57.0463	5.2896	3.0822
	57.0803	5.2815	3.2084
	57.1143	5.2837	3.0641
	57.1493	5.2826	3.0678
	57.1823	5.2847	3.0374
	57.2163	5.2867	3.0686
	57.2513	5.2827	3.0197
	57.2853	5.2818	3.0643
	57.3203	5.2932	2.8879
	57.3533	5.2838	3.0223
	57.3873	5.2921	2.7613
	57.4223	5.2822	2.8564
	57.4573	5.286	3.0915
	57.4903	5.2885	2.9934
	57.5253	5.2882	2.9659
	57.5593	5.2975	2.8755
	57.5933	5.304	2.5612
	57.6273	5.3027	2.6445
	57.6623	5.3047	2.6379
	57.6963	5.2994	2.9006
	57.7303	5.3107	2.8442
	57.7643	5.3102	2.7955
	57.7993	5.2989	3.0652
	57.8333	5.3064	2.8631
	57.8683	5.3131	2.8218
	57.9023	5.3039	2.8143
	57.9373	5.302	2.931
	57.9723	5.2947	3.2092
	58.0053	5.3091	2.6634
	58.0393	5.3168	2.7857
	58.0733	5.3084	3.1331
	58.1073	5.3005	2.9403
	58.1413	5.3087	2.8086
	58.1743	5.3133	2.7645
	58.2083	5.3066	2.9907
	58.2423	5.3188	3.0539
	58.2763	5.3193	2.7962
	58.3113	5.3089	2.8883
	58.3454	5.3207	2.9645
	58.3794	5.3119	2.8873
	58.4134	5.3048	2.9358
	58.4484	5.3149	2.8185
	58.4834	5.3201	2.7624
	58.5174	5.3193	2.9316
	58.5514	5.3149	3.1869
	58.5864	5.3107	3.1271
	58.6204	5.3153	3.0089
	58.6544	5.3178	2.999
	58.6884	5.3192	2.8074
	58.7214	5.3104	2.992
	58.7564	5.3158	3.042
	58.7904	5.3156	2.9724
	58.8234	5.3119	3.2251
	58.8574	5.3161	2.9005
	58.8924	5.3273	2.6271
	58.9264	5.3118	3.1884
	58.9604	5.3203	3.0523
	58.9954	5.3099	3.1365
	59.0294	5.3064	3.288
	59.0634	5.3116	3.2027
	59.0974	5.3119	3.0487
	59.1324	5.3078	2.9192
	59.1684	5.3143	2.8512
	59.2024	5.3038	3.0157
	59.2364	5.3083	2.9074
	59.2714	5.3195	2.6956
	59.3054	5.3167	2.9782
	59.3394	5.3139	2.9481
	59.3724	5.3178	2.9341
	59.4064	5.2997	3.3491
	59.4414	5.3202	2.6602
	59.4764	5.3194	2.7555
	59.5104	5.3191	2.8736
	59.5444	5.323	2.7277
	59.5794	5.3309	2.7994
	59.6144	5.3306	2.7447
	59.6494	5.3303	3.0369
	59.6844	5.3331	2.9129
	59.7174	5.3302	2.9885
	59.7514	5.3207	3.2767
	59.7854	5.3169	3.1286
	59.8194	5.3194	3.0236
	59.8534	5.33	2.8423
	59.8874	5.3332	2.9453
	59.9214	5.3446	2.6984
	59.9554	5.3459	2.9018
	59.9894	5.3332	2.6817
	60.0234	5.331	2.8254
	60.0574	5.3217	3.0258
	60.0915	5.3311	2.9063
	60.1255	5.3303	3.0497
	60.1605	5.3305	3.1384
	60.1945	5.3327	2.911
	60.2305	5.3276	3.1086
	60.2655	5.3282	3.1508
	60.3005	5.3239	3.1007
	60.3345	5.3245	3.1233
	60.3685	5.3211	3.1024
	60.4015	5.3244	3.0634
	60.4365	5.3156	3.0924
	60.4695	5.3151	3.3922
	60.5035	5.3232	3.055
	60.5385	5.3192	3.0969
	60.5725	5.3331	2.8141
	60.6065	5.3268	3.2467
	60.6415	5.3258	2.892
	60.6755	5.3288	3.1088
	60.7095	5.3115	3.3422
	60.7455	5.3017	3.5683
	60.7795	5.3149	3.281
	60.8145	5.3077	3.1999
	60.8495	5.2986	3.4022
	60.8825	5.2869	3.3739
	60.9165	5.2914	3.2503
	60.9515	5.2887	3.1322
	60.9845	5.2803	3.5923
	61.0185	5.2749	3.3964
	61.0535	5.2701	3.6114
	61.0875	5.2759	3.3076
	61.1215	5.2656	3.1853
	61.1565	5.2694	3.1454
	61.1915	5.2631	3.2356
	61.2255	5.2469	3.4154
	61.2605	5.2455	3.657
	61.2955	5.2586	3.3298
	61.3305	5.2534	3.3619
	61.3655	5.2659	2.9685
	61.3995	5.2508	3.3546
	61.4335	5.2509	3.306
	61.4665	5.2408	3.1018
	61.5005	5.2435	3.0932
	61.5345	5.2522	3.0095
	61.5685	5.2481	3.1091
	61.6025	5.2482	3.1546
	61.6375	5.2384	3.0541
	61.6715	5.2536	2.7967
	61.7055	5.2427	3.0538
	61.7405	5.2407	3.1277
	61.7755	5.2484	2.8203
	61.8095	5.2462	2.8945
	61.8446	5.2493	2.9523
	61.8786	5.2398	3.0772
	61.9126	5.244	3.0397
	61.9476	5.2509	2.8956
	61.9816	5.2494	2.9004
	62.0156	5.255	2.667
	62.0506	5.2466	2.9104
	62.0846	5.2512	2.9265
	62.1176	5.2492	2.9984
	62.1526	5.2572	2.8898
	62.1866	5.2534	2.7769
	62.2216	5.2448	3.113
	62.2566	5.2431	3.2296
	62.2916	5.2375	3.16
	62.3276	5.2372	3.1353
	62.3606	5.2365	3.1101
	62.3946	5.2218	3.5093
	62.4286	5.217	3.5712
	62.4636	5.211	3.6476
	62.4966	5.1966	3.6827
	62.5306	5.192	3.4048
	62.5656	5.1899	3.5431
	62.5986	5.1868	3.3021
	62.6336	5.1894	3.2
	62.6676	5.1877	3.4414
	62.7016	5.1862	3.3929
	62.7366	5.1904	3.2458
	62.7716	5.1834	3.2746
	62.8066	5.1684	3.5937
	62.8416	5.1744	3.1473
	62.8756	5.1668	3.2054
	62.9106	5.1602	3.2242
	62.9446	5.1621	3.2221
	62.9796	5.1564	3.5123
	63.0136	5.1554	3.3699
	63.0476	5.1588	3.3595
	63.0806	5.1581	3.07
	63.1156	5.1546	3.2216
	63.1496	5.1483	3.3669
	63.1836	5.1511	3.0472
	63.2166	5.1442	3.3256
	63.2516	5.1327	3.5393
	63.2866	5.1433	3.2497
	63.3206	5.1391	3.2162
	63.3556	5.1205	3.4713
	63.3906	5.1227	3.3016
	63.4256	5.1246	3.2653
	63.4586	5.1322	2.9951
	63.4936	5.1152	3.0505
	63.5276	5.1213	3.1402
	63.5606	5.1252	2.9664
	63.5947	5.1308	2.9903
	63.6297	5.136	2.8544
	63.6627	5.1312	2.8802
	63.6977	5.1291	2.8281
	63.7307	5.1314	3.0259
	63.7657	5.1293	3.1472
	63.7997	5.1252	2.9929
	63.8337	5.1208	3.1303
	63.8687	5.1229	3.0571
	63.9037	5.1203	2.9042
	63.9377	5.1111	3.044
	63.9737	5.1231	2.7753
	64.0067	5.1172	3.1653
	64.0407	5.1174	3.2364
	64.0747	5.113	3.1892
	64.1087	5.1093	3.3152
	64.1437	5.1144	3.0938
	64.1767	5.1123	2.9289
	64.2107	5.1122	3.1221
	64.2457	5.1266	2.6241
	64.2787	5.1249	2.8134
	64.3137	5.1265	2.9712
	64.3477	5.1218	3.0827
	64.3807	5.1267	2.8589
	64.4147	5.1181	2.8816
	64.4497	5.1243	2.7727
	64.4847	5.1234	2.7132
	64.5197	5.1172	3.0333
	64.5547	5.1242	2.9188
	64.5897	5.118	3.1535
	64.6227	5.1116	3.2606
	64.6577	5.1076	3.2945
	64.6907	5.1157	2.9408
	64.7257	5.1209	2.748
	64.7597	5.1217	2.6894
	64.7947	5.1318	2.7306
	64.8287	5.1209	2.9854
	64.8637	5.1253	2.9101
	64.8977	5.1277	3.0391
	64.9327	5.1249	2.8807
	64.9687	5.1243	3.0636
	65.0037	5.1265	2.879
	65.0377	5.1382	2.6807
	65.0717	5.1354	2.8926
	65.1057	5.1295	2.9652
	65.1407	5.1347	2.7873
	65.1747	5.1272	2.9351
	65.2087	5.1426	2.8367
	65.2427	5.1335	3.2427
	65.2777	5.1401	3.0413
	65.3107	5.1384	2.9544
	65.3448	5.1341	2.8473
	65.3788	5.1414	2.5962
	65.4138	5.1468	2.7819
	65.4478	5.1592	2.8152
	65.4818	5.1668	2.6417
	65.5178	5.149	3.1885
	65.5528	5.1405	3.3553
	65.5868	5.1306	3.3946
	65.6208	5.1364	3.0872
	65.6548	5.1385	2.9328
	65.6898	5.1466	2.7104
	65.7238	5.1505	2.7296
	65.7588	5.1447	2.86
	65.7938	5.1524	2.9522
	65.8268	5.1437	3.081
	65.8618	5.1539	2.8525
	65.8968	5.138	3.2882
	65.9318	5.1386	3.0602
	65.9668	5.1358	3.2153
	66.0008	5.1341	3.1646
	66.0348	5.1482	2.7021
	66.0688	5.1372	2.9753
	66.1038	5.1372	3.195
	66.1368	5.1352	3.0742
	66.1708	5.1379	2.7345
	66.2048	5.1378	3.0316
	66.2388	5.1315	2.9498
	66.2728	5.1365	2.9713
	66.3078	5.1393	2.8885
	66.3418	5.1411	2.8489
	66.3768	5.1387	2.9845
	66.4098	5.1427	2.9303
	66.4438	5.1437	2.8268
	66.4778	5.141	2.932
	66.5138	5.1469	2.8189
	66.5488	5.1442	2.7364
	66.5838	5.1378	3.0411
	66.6178	5.1356	3.0178
	66.6518	5.1302	3.1322
	66.6858	5.1275	3.3141
	66.7208	5.1274	3.3228
	66.7548	5.1277	3.3271
	66.7888	5.1232	3.0831
	66.8228	5.1248	3.2836
	66.8578	5.1262	3.1418
	66.8928	5.1187	3.2268
	66.9268	5.1283	3.0524
	66.9618	5.1299	2.867
	66.9968	5.1183	3.07
	67.0308	5.1195	3.3948
	67.0659	5.1183	3.2639
	67.1009	5.1162	3.3214
	67.1339	5.1115	3.2171
	67.1689	5.1219	2.9765
	67.2039	5.1154	3.0733
	67.2389	5.1172	2.9644
	67.2729	5.119	3.0347
	67.3069	5.1131	3.031
	67.3419	5.1093	3.3357
	67.3749	5.1117	3.2624
	67.4099	5.0947	3.4774
	67.4439	5.1052	2.9915
	67.4789	5.1104	2.9032
	67.5139	5.1129	2.9075
	67.5479	5.0947	3.384
	67.5819	5.0971	3.0892
	67.6169	5.0963	3.3522
	67.6499	5.1	3.1566
	67.6839	5.0889	3.3695
	67.7189	5.0917	3.1505
	67.7519	5.0887	3.0129
	67.7869	5.092	2.9935
	67.8219	5.0933	2.82
	67.8559	5.0991	2.9712
	67.8889	5.0914	3.1934
	67.9229	5.093	3.0961
	67.9569	5.0923	3.2802
	67.9909	5.0924	2.9242
	68.0259	5.0894	3.0234
	68.0609	5.0866	3.2497
	68.0959	5.0814	3.3054
	68.1299	5.0808	3.2386
	68.1639	5.08	3.3513
	68.1979	5.0886	3.2399
	68.2579	5.0925	2.8264
	68.2939	5.0943	2.6372
	68.3279	5.1009	2.7116
	68.3629	5.0862	2.9678
	68.3979	5.0897	2.7211
	68.4319	5.0867	2.9423
	68.4659	5.0867	3.0806
	68.5009	5.0841	3.0633
	68.5359	5.0907	3.0592
	68.5699	5.0874	3.1169
	68.6039	5.0797	3.061
	68.6389	5.0817	2.919
	68.6739	5.0873	2.9144
[truncated: 7,443 more rows]

## Sheet: Fig 2C
		Mean, µm	SD, µm	N
	compression	0.186429	0.055968	14
	disassembly	0.207857	0.0631456	14
