# Supplementary material for: A new insight into RecA filament regulation by RecX from the analysis of conformation-specific interactions
Source: eLife. 2022 Jun 22;11:e78409. doi: 10.7554/eLife.78409 (PMC9252578; doi:10.7554/eLife.78409)
Supplement: Figure 3—figure supplement 1—source data 1. [file elife-78409-fig3-figsupp1-data1.xlsx]

## Sheet: 1
	Time, s	Length, µm
	0	4.6834
	0.035	4.6834
	0.07	4.68
	0.105	4.6799
	0.14	4.6742
	0.175	4.6952
	0.21	4.6861
	0.245	4.6937
	0.28	4.6944
	0.314	4.6899
	0.349	4.6881
	0.385	4.6829
	0.42	4.6954
	0.455	4.7027
	0.489	4.6927
	0.524	4.7037
	0.559	4.7049
	0.594	4.7102
	0.629	4.6965
	0.664	4.7024
	0.698	4.7018
	0.732	4.7067
	0.767	4.692
	0.801	4.6957
	0.835	4.6932
	0.87	4.6918
	0.905	4.698
	0.94	4.7037
	0.976	4.7122
	1.012	4.7033
	1.047	4.7089
	1.082	4.708
	1.116	4.702
	1.151	4.6979
	1.185	4.7036
	1.22	4.7014
	1.255	4.7022
	1.291	4.7035
	1.325	4.693
	1.36	4.7042
	1.395	4.7063
	1.43	4.6972
	1.465	4.6979
	1.5001	4.7003
	1.5351	4.7055
	1.5691	4.7169
	1.6041	4.7225
	1.6381	4.7003
	1.6731	4.6949
	1.7081	4.6955
	1.7431	4.6972
	1.7781	4.7053
	1.8111	4.7019
	1.8451	4.7173
	1.8801	4.7098
	1.9141	4.7162
	1.9481	4.7079
	1.9821	4.7098
	2.0161	4.7026
	2.0511	4.7157
	2.0851	4.7215
	2.1201	4.7108
	2.1551	4.7074
	2.1911	4.7064
	2.2251	4.708
	2.2591	4.6964
	2.2941	4.7056
	2.3291	4.7119
	2.3631	4.7008
	2.3981	4.7182
	2.4331	4.7096
	2.4681	4.7161
	2.5031	4.7136
	2.5381	4.7024
	2.5741	4.7058
	2.6081	4.7152
	2.6421	4.7068
	2.6771	4.7113
	2.7121	4.7145
	2.7461	4.7123
	2.7811	4.7077
	2.8161	4.7096
	2.8511	4.7027
	2.8861	4.704
	2.9211	4.6946
	2.9571	4.7148
	2.9911	4.7145
	3.0261	4.7065
	3.0601	4.7022
	3.0951	4.7091
	3.1301	4.7106
	3.1651	4.7118
	3.2001	4.7191
	3.2352	4.7118
	3.2702	4.7053
	3.3052	4.6994
	3.3402	4.7058
	3.3752	4.6867
	3.4102	4.69
	3.4452	4.688
	3.4802	4.6887
	3.5152	4.6915
	3.5512	4.6994
	3.5862	4.691
	3.6212	4.6839
	3.6552	4.6953
	3.6902	4.6994
	3.7252	4.7038
	3.7592	4.7012
	3.7932	4.6952
	3.8272	4.6934
	3.8622	4.692
	3.8972	4.6922
	3.9312	4.6919
	3.9662	4.6901
	4.0012	4.6848
	4.0372	4.6947
	4.0722	4.6843
	4.1072	4.6863
	4.1412	4.6983
	4.1762	4.702
	4.2112	4.6973
	4.2452	4.6929
	4.2802	4.6898
	4.3152	4.6855
	4.3512	4.6859
	4.3862	4.6905
	4.4202	4.6795
	4.4552	4.6834
	4.4892	4.6888
	4.5232	4.6923
	4.5582	4.6811
	4.5932	4.6854
	4.6272	4.6778
	4.6622	4.6903
	4.6972	4.6872
	4.7312	4.6891
	4.7662	4.696
	4.8012	4.6878
	4.8352	4.6782
	4.8692	4.6856
	4.9032	4.683
	4.9372	4.6908
	4.9722	4.6847
	5.0063	4.6876
	5.0413	4.6921
	5.0753	4.6921
	5.1103	4.689
	5.1453	4.6894
	5.1803	4.6873
	5.2153	4.6817
	5.2503	4.6754
	5.2843	4.6785
	5.3193	4.6867
	5.3523	4.699
	5.3873	4.7057
	5.4223	4.6914
	5.4563	4.6836
	5.4903	4.6914
	5.5253	4.6918
	5.5603	4.6853
	5.5943	4.6893
	5.6303	4.6881
	5.6653	4.6893
	5.7003	4.6746
	5.7353	4.6819
	5.7703	4.6845
	5.8033	4.7002
	5.8383	4.6991
	5.8723	4.6978
	5.9063	4.6865
	5.9403	4.7042
	5.9753	4.7021
	6.0103	4.6968
	6.0453	4.6898
	6.0803	4.7002
	6.1163	4.6851
	6.1503	4.6879
	6.1853	4.6851
	6.2193	4.6899
	6.2533	4.6885
	6.2873	4.6768
	6.3223	4.6805
	6.3573	4.6797
	6.3913	4.6776
	6.4263	4.6735
	6.4613	4.6827
	6.4963	4.6746
	6.5303	4.6741
	6.5653	4.6884
	6.5993	4.6789
	6.6333	4.6773
	6.6663	4.6814
	6.7013	4.6742
	6.7364	4.6767
	6.7714	4.6826
	6.8064	4.6845
	6.8414	4.6819
	6.8764	4.6792
	6.9114	4.6768
	6.9464	4.6859
	6.9814	4.6883
	7.0144	4.6876
	7.0484	4.6901
	7.0834	4.6859
	7.1184	4.6929
	7.1534	4.6903
	7.1884	4.6875
	7.2234	4.6799
	7.2574	4.6843
	7.2934	4.6723
	7.3274	4.6847
	7.3624	4.6861
	7.3974	4.6833
	7.4314	4.6886
	7.4654	4.6964
	7.4994	4.6851
	7.5334	4.6882
	7.5684	4.6972
	7.6024	4.6955
	7.6374	4.6939
	7.6724	4.6931
	7.7064	4.6944
	7.7414	4.7
	7.7764	4.692
	7.8114	4.6989
	7.8454	4.6941
	7.8804	4.6984
	7.9154	4.7053
	7.9504	4.7113
	7.9844	4.7119
	8.0194	4.7161
	8.0534	4.7099
	8.0884	4.7115
	8.1234	4.7134
	8.1594	4.7135
	8.1944	4.7186
	8.2284	4.7134
	8.2624	4.713
	8.2974	4.7128
	8.3324	4.7195
	8.3664	4.7156
	8.4004	4.7194
	8.4354	4.717
	8.4694	4.7127
	8.5045	4.7157
	8.5405	4.7049
	8.5745	4.718
	8.6095	4.7173
	8.6445	4.7181
	8.6775	4.7125
	8.7125	4.7256
	8.7465	4.7139
	8.7805	4.7153
	8.8155	4.713
	8.8495	4.7158
	8.8845	4.7101
	8.9185	4.7103
	8.9525	4.7173
	8.9875	4.7274
	9.0225	4.7188
	9.0575	4.7299
	9.0925	4.7199
	9.1265	4.7264
	9.1605	4.7279
	9.1955	4.7215
	9.2305	4.7144
	9.2645	4.7242
	9.2995	4.7098
	9.3335	4.7021
	9.3675	4.7192
	9.4035	4.7144
	9.4385	4.7213
	9.4735	4.7123
	9.5085	4.7037
	9.5425	4.7007
	9.5775	4.7043
	9.6125	4.7138
	9.6465	4.7043
	9.6805	4.709
	9.7155	4.7116
	9.7495	4.7159
	9.7845	4.7123
	9.8195	4.7119
	9.8545	4.724
	9.8895	4.7095
	9.9245	4.7175
	9.9575	4.7218
	9.9925	4.7244
	10.0265	4.7174
	10.0605	4.7237
	10.0955	4.7242
	10.1305	4.7277
	10.1655	4.7208
	10.2005	4.718
	10.2366	4.7145
	10.2706	4.7215
	10.3056	4.7161
	10.3406	4.7131
	10.3756	4.7149
	10.4096	4.712
	10.4436	4.725
	10.4776	4.7164
	10.5126	4.7128
	10.5466	4.7123
	10.5806	4.7204
	10.6156	4.7176
	10.6506	4.7122
	10.6856	4.7114
	10.7196	4.7102
	10.7546	4.7028
	10.7896	4.7002
	10.8236	4.7033
	10.8586	4.7114
	10.8936	4.7078
	10.9286	4.7058
	10.9626	4.7003
	10.9976	4.7185
	11.0316	4.7093
	11.0666	4.698
	11.1016	4.7048
	11.1366	4.7078
	11.1716	4.6979
	11.2066	4.6956
	11.2406	4.6859
	11.2756	4.698
	11.3106	4.6904
	11.3456	4.6861
	11.3806	4.6936
	11.4156	4.6947
	11.4516	4.6853
	11.4856	4.6959
	11.5196	4.6881
	11.5546	4.6841
	11.5886	4.7072
	11.6226	4.705
	11.6566	4.7076
	11.6906	4.6995
	11.7246	4.687
	11.7586	4.6966
	11.7936	4.7086
	11.8286	4.6963
	11.8626	4.6967
	11.8976	4.7025
	11.9326	4.7009
	11.9686	4.7143
	12.0037	4.7199
	12.0377	4.7167
	12.0727	4.7151
	12.1077	4.7113
	12.1427	4.712
	12.1777	4.7136
	12.2117	4.7123
	12.2467	4.7119
	12.2817	4.7087
	12.3167	4.7045
	12.3507	4.712
	12.3857	4.7013
	12.4197	4.708
	12.4537	4.7103
	12.4887	4.7113
	12.5227	4.7039
	12.5577	4.6979
	12.5927	4.7144
	12.6277	4.7135
	12.6627	4.7134
	12.6977	4.7078
	12.7327	4.7127
	12.7677	4.7051
	12.8017	4.6962
	12.8367	4.7021
	12.8717	4.7032
	12.9067	4.701
	12.9417	4.706
	12.9757	4.7062
	13.0127	4.7114
	13.0477	4.7095
	13.0827	4.7074
	13.1167	4.7065
	13.1517	4.6885
	13.1867	4.6864
	13.2217	4.6949
	13.2577	4.6942
	13.2917	4.6995
	13.3267	4.6912
	13.3617	4.7082
	13.3957	4.6987
	13.4307	4.7071
	13.4657	4.706
	13.5007	4.6926
	13.5357	4.6914
	13.5707	4.6989
	13.6047	4.6923
	13.6397	4.6966
	13.6747	4.7034
	13.7097	4.7127
	13.7448	4.712
	13.7808	4.7187
	13.8148	4.7166
	13.8488	4.7231
	13.8838	4.7264
	13.9188	4.7205
	13.9538	4.724
	13.9878	4.7248
	14.0228	4.7317
	14.0588	4.7216
	14.0958	4.7242
	14.1298	4.729
	14.1638	4.7157
	14.1988	4.7232
	14.2328	4.7098
	14.2678	4.7103
	14.3028	4.7183
	14.3378	4.7096
	14.3728	4.7165
	14.4068	4.7119
	14.4418	4.7059
	14.4768	4.7166
	14.5108	4.7123
	14.5458	4.7195
	14.5808	4.7194
	14.6148	4.7127
	14.6498	4.7158
	14.6848	4.7151
	14.7188	4.7122
	14.7528	4.7073
	14.7868	4.7094
	14.8218	4.7016
	14.8568	4.6973
	14.8918	4.7134
	14.9268	4.7136
	14.9618	4.7146
	14.9968	4.7157
	15.0308	4.7205
	15.0648	4.7131
	15.0998	4.7057
	15.1338	4.7109
	15.1688	4.7058
	15.2038	4.7134
	15.2378	4.7026
	15.2718	4.7129
	15.3078	4.7059
	15.3438	4.7047
	15.3778	4.7099
	15.4128	4.7087
	15.4468	4.7056
	15.4819	4.7073
	15.5159	4.6999
	15.5509	4.6994
	15.5859	4.7012
	15.6209	4.7028
	15.6559	4.704
	15.6909	4.7006
	15.7259	4.7069
	15.7609	4.6893
	15.7949	4.7008
	15.8299	4.6948
	15.8639	4.6993
	15.8989	4.6907
	15.9329	4.695
	15.9669	4.6954
	16.0019	4.6947
	16.0359	4.6958
	16.0709	4.6925
	16.1059	4.6949
	16.1419	4.6848
	16.1759	4.6799
	16.2099	4.696
	16.2439	4.7107
	16.2789	4.6941
	16.3129	4.686
	16.3479	4.685
	16.3819	4.6871
	16.4169	4.6988
	16.4519	4.6883
	16.4869	4.6879
	16.5219	4.7055
	16.5569	4.6963
	16.5919	4.7018
	16.6259	4.6938
	16.6609	4.6977
	16.6959	4.6935
	16.7299	4.6965
	16.7649	4.6913
	16.7999	4.7075
	16.8349	4.6917
	16.8709	4.6846
	16.9049	4.6931
	16.9399	4.6977
	16.9729	4.6867
	17.0079	4.6848
	17.0419	4.6873
	17.0769	4.694
	17.1109	4.6922
	17.1449	4.7008
	17.1799	4.69
	17.215	4.6947
	17.25	4.6816
	17.285	4.6853
	17.321	4.6836
	17.355	4.6881
	17.39	4.6916
	17.425	4.6917
	17.46	4.692
	17.494	4.6905
	17.529	4.6819
	17.564	4.6881
	17.599	4.6838
	17.634	4.6882
	17.669	4.6902
	17.704	4.6937
	17.74	4.6983
	17.775	4.693
	17.81	4.6976
	17.845	4.6945
	17.88	4.6917
	17.915	4.6819
	17.951	4.6942
	17.986	4.6858
	18.021	4.6858
	18.055	4.6949
	18.089	4.6983
	18.123	4.6845
	18.158	4.6952
	18.192	4.6935
	18.227	4.6875
	18.262	4.6909
	18.297	4.6965
	18.332	4.6953
	18.367	4.6861
	18.402	4.6946
	18.437	4.7014
	18.472	4.6977
	18.506	4.6886
	18.54	4.7074
	18.574	4.6957
	18.609	4.7016
	18.644	4.7048
	18.679	4.7026
	18.713	4.7054
	18.748	4.7082
	18.782	4.7129
	18.817	4.6926
	18.852	4.7063
	18.887	4.712
	18.922	4.7133
	18.956	4.7151
	18.9911	4.7132
	19.0251	4.7071
	19.0601	4.7154
	19.0941	4.7116
	19.1291	4.7174
	19.1641	4.7104
	19.1991	4.7144
	19.2331	4.7173
	19.2681	4.7192
	19.3021	4.7105
	19.3371	4.7154
	19.3731	4.7149
	19.4071	4.7218
	19.4421	4.7172
	19.6141	4.7123
	19.6491	4.709
	19.6841	4.7099
	19.7181	4.7068
	19.7521	4.7181
	19.7871	4.7108
	19.8211	4.7083
	19.8561	4.7129
	19.8911	4.7147
	19.9251	4.7164
	19.9611	4.7177
	19.9961	4.7203
	20.0311	4.7336
	20.0661	4.7238
	20.1001	4.7302
	20.1341	4.7389
	20.1691	4.7303
	20.2031	4.7376
	20.2371	4.7352
	20.2711	4.7342
	20.3061	4.731
	20.3411	4.7321
	20.3761	4.7386
	20.4111	4.7281
	20.4461	4.7261
	20.4811	4.7289
	20.5161	4.7283
	20.5511	4.7262
	20.5851	4.729
	20.6191	4.7228
	20.6541	4.7323
	20.6891	4.7206
	20.7242	4.7216
	20.7592	4.721
	20.7942	4.7247
	20.8292	4.7228
	20.8642	4.7346
	20.8972	4.719
	20.9322	4.7204
	20.9662	4.7223
	21.0012	4.7344
	21.0352	4.7265
	21.0702	4.7239
	21.1052	4.7161
	21.1392	4.7199
	21.1752	4.7139
	21.2092	4.7262
	21.2442	4.7226
	21.2792	4.7195
	21.3142	4.7173
	21.3472	4.7162
	21.3822	4.7214
	21.4162	4.7251
	21.4522	4.7187
	21.4862	4.7237
	21.5212	4.7234
	21.5562	4.7336
	21.5922	4.7294
	21.6272	4.7356
	21.6622	4.7343
	21.6962	4.7314
	21.7312	4.7312
	21.7662	4.7299
	21.8012	4.7241
	21.8362	4.7391
	21.9112	4.7266
	21.9462	4.7344
	21.9802	4.7188
	22.0152	4.7339
	22.0492	4.7304
	22.0842	4.714
	22.1482	4.7243
	22.1822	4.7264
	22.2172	4.7339
	22.2522	4.7229
	22.2872	4.7342
	22.3212	4.7297
	22.3562	4.736
	22.3912	4.7475
	22.4262	4.7391
	22.4602	4.7436
	22.4943	4.7499
	22.5293	4.7421
	22.5633	4.7561
	22.5983	4.7472
	22.6333	4.747
	22.6683	4.7415
	22.7023	4.7433
	22.7383	4.7438
	22.7733	4.738
	22.8083	4.7354
	22.8433	4.7289
	22.8783	4.7374
	22.9123	4.7342
	22.9473	4.7303
	22.9813	4.727
	23.0163	4.7328
	23.0513	4.7233
	23.0853	4.7337
	23.1193	4.7321
	23.1543	4.7335
	23.1893	4.7349
	23.2243	4.7402
	23.2593	4.7482
	23.2933	4.7393
	23.3273	4.7392
	23.3623	4.7211
	23.3973	4.736
	23.4313	4.7386
	23.4663	4.7398
	23.5023	4.7447
	23.5373	4.7315
	23.5713	4.7297
	23.6063	4.7199
	23.6413	4.7183
	23.6753	4.7164
	23.7093	4.7187
	23.7443	4.7261
	23.7793	4.7308
	23.8143	4.7363
	23.8503	4.7327
	23.8853	4.741
	23.9183	4.7425
	23.9533	4.7458
	23.9893	4.7417
	24.0243	4.7353
	24.0593	4.7387
	24.0943	4.7328
	24.1293	4.7259
	24.1653	4.7265
	24.1993	4.7182
	24.2344	4.7106
	24.2704	4.723
	24.3054	4.7025
	24.3394	4.7118
	24.3744	4.6979
	24.4084	4.6924
	24.4424	4.7031
	24.4774	4.6999
	24.5124	4.6986
	24.5474	4.6964
	24.5824	4.6994
	24.6174	4.6935
	24.6524	4.7015
	24.6884	4.6995
	24.7224	4.7037
	24.7574	4.7091
	24.7924	4.7018
	24.8274	4.7094
	24.8614	4.7045
	24.8954	4.6967
	24.9304	4.7088
	24.9644	4.6999
	24.9994	4.6971
	25.0344	4.6911
	25.0694	4.693
	25.1034	4.6917
	25.1384	4.6911
	25.1734	4.695
	25.2084	4.6892
	25.2424	4.6927
	25.2774	4.7005
	25.3114	4.7135
	25.3464	4.6948
	25.3814	4.6987
	25.4164	4.7096
	25.4514	4.7151
	25.4864	4.7071
	25.5214	4.7083
	25.5554	4.7035
	25.5904	4.6993
	25.6244	4.6943
	25.6594	4.6977
	25.6944	4.6884
	25.7284	4.6828
	25.7634	4.6919
	25.7984	4.6806
	25.8334	4.6938
	25.8684	4.686
	25.9024	4.6953
	25.9364	4.6826
	25.9705	4.6827
	26.0055	4.6977
	26.0395	4.6891
	26.0755	4.6832
	26.1095	4.6792
	26.1445	4.6727
	26.1785	4.6774
	26.2135	4.6672
	26.2485	4.6719
	26.2835	4.6515
	26.3185	4.6551
	26.3525	4.6567
	26.3875	4.645
	26.4225	4.6366
	26.4565	4.6372
	26.4915	4.6285
	26.5265	4.6265
	26.5625	4.6012
	26.5975	4.5913
	26.6315	4.5786
	26.6665	4.5585
	26.7015	4.544
	26.7365	4.5184
	26.7715	4.4992
	26.8055	4.4845
	26.8395	4.463
	26.8745	4.4404
	26.9085	4.4261
	26.9435	4.4095
	26.9785	4.382
	27.0135	4.3618
	27.0485	4.3455
	27.0835	4.3199
	27.1185	4.3023
	27.1535	4.2853
	27.1885	4.2688
	27.2225	4.2405
	27.2575	4.2291
	27.2925	4.2128
	27.3275	4.1914
	27.3625	4.1765
	27.3975	4.1575
	27.4325	4.1383
	27.4665	4.1094
	27.5015	4.0936
	27.5355	4.0799
	27.5705	4.0704
	27.6045	4.0467
	27.6395	4.0394
	27.6745	4.0299
	27.7096	4.0091
	27.7446	3.991
	27.7786	3.9768
	27.8136	3.9691
	27.8486	3.9504
	27.8836	3.9357
	27.9176	3.925
	27.9526	3.9076
	27.9866	3.8953
	28.0216	3.8978
	28.0566	3.8759
	28.0906	3.8666
	28.1256	3.8542
	28.1606	3.8518
	28.1946	3.8345
	28.2296	3.8289
	28.2646	3.8121
	28.2986	3.806
	28.3326	3.8033
	28.3676	3.8029
	28.4016	3.7884
	28.4356	3.7861
	28.4706	3.7825
	28.5046	3.785
	28.5386	3.7743
	28.5736	3.7743
	28.6086	3.7721
	28.6436	3.7721
	28.6786	3.7768
	28.7126	3.7618
	28.7476	3.7528
	28.7816	3.7517
	28.8166	3.7489
	28.8506	3.7378
	28.8856	3.7373
	28.9196	3.733
	28.9536	3.7281
	28.9896	3.7297
	29.0256	3.725
	29.0606	3.7255
	29.0956	3.721
	29.1306	3.7075
	29.1656	3.7145
	29.2006	3.7075
	29.2356	3.7132
	29.2706	3.7111
	29.3056	3.7066
	29.3416	3.7018
	29.3766	3.7154
	29.4116	3.6992
	29.4466	3.7055
	29.4817	3.7019
	29.5167	3.6917
	29.5507	3.6952
	29.5857	3.6893
	29.6217	3.6985
	29.6567	3.6987
	29.6917	3.6965
	29.7267	3.6992
	29.7617	3.6983
	29.7967	3.6954
	29.8307	3.6895
	29.8657	3.6983
	29.9007	3.6905
	29.9357	3.6929
	29.9707	3.687
	30.0057	3.6809
	30.0417	3.6855
	30.0757	3.6943
	30.1107	3.6836
	30.1457	3.6897
	30.1797	3.6905
	30.2147	3.6868
	30.2487	3.6798
	30.2837	3.6894
	30.3177	3.6843
	30.3527	3.6843
	30.3877	3.6806
	30.4227	3.6789
	30.4577	3.6784
	30.4917	3.6651
	30.5267	3.6753
	30.5617	3.6798
	30.5957	3.6839
	30.6307	3.6826
	30.6657	3.6893
	30.7007	3.6788
	30.7357	3.6801
	30.7697	3.6886
	30.8057	3.6897
	30.8397	3.691
	30.8737	3.6828
	30.9077	3.6823
	30.9427	3.6914
	30.9777	3.6951
	31.0127	3.6896
	31.0467	3.6878
	31.0817	3.6921
	31.1157	3.6918
	31.1507	3.6933
	31.1867	3.6922
	31.2218	3.693
	31.2568	3.6871
	31.2908	3.6902
	31.3258	3.6766
	31.3608	3.6788
	31.3958	3.6837
	31.4308	3.6782
	31.4648	3.6762
	31.4998	3.6798
	31.5348	3.6784
	31.5698	3.6653
	31.6048	3.6702
	31.6398	3.668
	31.6738	3.6716
	31.7088	3.6664
	31.7438	3.6766
	31.7788	3.6787
	31.8138	3.6725
	31.8478	3.6676
	31.8828	3.6627
	31.9168	3.6661
	31.9518	3.6673
	31.9868	3.6552
	32.0218	3.6559
	32.0558	3.6463
	32.0898	3.653
	32.1248	3.6348
	32.1598	3.641
	32.1948	3.6346
	32.2298	3.641
	32.2638	3.6398
	32.2988	3.6502
	32.3338	3.6373
	32.3688	3.6442
	32.4038	3.6343
	32.4368	3.6263
	32.4708	3.6294
	32.5058	3.6322
	32.5408	3.6282
	32.5748	3.6323
	32.6098	3.6366
	32.6448	3.6307
	32.6808	3.6437
	32.7138	3.6403
	32.7498	3.6443
	32.7838	3.6447
	32.8188	3.6533
	32.8528	3.6589
	32.8868	3.6541
	32.9218	3.6607
	32.9569	3.6563
	32.9909	3.6537
	33.0259	3.6552
	33.0599	3.6437
	33.0949	3.6519
	33.1289	3.6606
	33.1639	3.6508
	33.1989	3.654
	33.2339	3.6522
	33.2679	3.6581
	33.3019	3.6558
	33.3359	3.6557
	33.3709	3.6559
	33.4059	3.6565
	33.4409	3.6665
	33.4749	3.6544
	33.5099	3.66
	33.5439	3.6575
	33.5789	3.6511
	33.6129	3.6656
	33.6479	3.6546
	33.6829	3.6615
	33.7189	3.6594
	33.7529	3.6578
	33.7869	3.6599
	33.8219	3.6648
	33.8559	3.6671
	33.8909	3.6673
	33.9259	3.6618
	33.9619	3.6649
	33.9959	3.6594
	34.0309	3.6666
	34.0659	3.6656
	34.0999	3.6715
	34.1329	3.6741
	34.1679	3.6757
	34.2009	3.6632
	34.2359	3.6752
	34.2709	3.673
	34.3049	3.6814
	34.3399	3.6796
	34.3739	3.671
	34.4089	3.6788
	34.4439	3.6719
	34.4799	3.6769
	34.5139	3.6798
	34.5479	3.6823
	34.5819	3.6909
	34.6169	3.6859
	34.6519	3.6826
	34.6869	3.6861
	34.722	3.6891
	34.757	3.686
	34.792	3.6828
	34.827	3.6819
	34.862	3.6863
	34.897	3.6862
	34.931	3.6874
	34.966	3.684
	35.001	3.6753
	35.035	3.6823
	35.07	3.6848
	35.105	3.6874
	35.14	3.6923
	35.175	3.6837
	35.208	3.691
	35.243	3.6849
	35.278	3.6789
	35.313	3.6828
	35.348	3.6822
	35.383	3.6829
	35.418	3.6848
	35.453	3.6873
	35.488	3.6838
	35.523	3.6806
	35.558	3.6821
	35.593	3.682
	35.629	3.6793
	35.663	3.6777
	35.698	3.6768
	35.733	3.6735
	35.768	3.6689
	35.803	3.6764
	35.838	3.6699
	35.873	3.6723
	35.907	3.6762
	35.942	3.6817
	35.977	3.6703
	36.011	3.6824
	36.045	3.6675
	36.079	3.6721
	36.113	3.6739
	36.147	3.6731
	36.181	3.6704
	36.215	3.6728
	36.249	3.6744
	36.284	3.6728
	36.319	3.6702
	36.353	3.6676
	36.388	3.6738
	36.423	3.6759
	36.4591	3.6601
	36.4931	3.6684
	36.5271	3.6712
	36.5621	3.6736
	36.5961	3.6706
	36.6301	3.6692
	36.6651	3.6627
	36.7001	3.6699
	36.7351	3.6643
	36.7701	3.6735
	36.8051	3.6562
	36.8401	3.6666
	36.8751	3.662
	36.9091	3.6593
	36.9431	3.6672
	36.9771	3.6586
	37.0111	3.6642
	37.0451	3.6688
	37.0791	3.6546
	37.1131	3.6565
	37.1481	3.6617
	37.1831	3.6612
	37.2181	3.6595
	37.2521	3.6628
	37.2871	3.6616
	37.3221	3.6614
	37.3571	3.6648
	37.3921	3.6626
	37.4261	3.6554
	37.4611	3.6631
	37.4961	3.6565
	37.5311	3.658
	37.5661	3.6639
	37.6021	3.6622
	37.6371	3.6556
	37.6711	3.6616
	37.7061	3.6555
	37.7411	3.6613
	37.7761	3.6608
	37.8111	3.6548
	37.8451	3.6529
	37.8801	3.6541
	37.9141	3.6634
	37.9481	3.66
	37.9821	3.6658
	38.0171	3.6572
	38.0521	3.6581
	38.0871	3.6649
	38.1211	3.6624
	38.1561	3.6659
	38.1901	3.6623
	38.2252	3.6628
	38.2602	3.6617
	38.2942	3.656
	38.3292	3.6578
	38.3632	3.6612
	38.3982	3.6648
	38.4332	3.6679
	38.4672	3.6707
	38.5022	3.665
	38.5362	3.6638
	38.5712	3.6611
	38.6062	3.66
	38.6402	3.6613
	38.6752	3.6624
	38.7092	3.6613
	38.7442	3.6574
	38.7792	3.6554
	38.8122	3.6675
	38.8472	3.6619
	38.8822	3.6559
	38.9172	3.6666
	38.9532	3.6632
	38.9862	3.6603
	39.0212	3.6661
	39.0552	3.6617
	39.0892	3.6663
	39.1232	3.6622
	39.1572	3.6557
	39.1922	3.6683
	39.2272	3.6639
	39.2612	3.6609
	39.2962	3.6594
	39.3312	3.6636
	39.3662	3.6678
	39.4012	3.6683
	39.4352	3.6645
	39.4702	3.6566
	39.5042	3.6438
	39.5392	3.6557
	39.5742	3.6567
	39.6092	3.6682
	39.6442	3.6571
	39.6792	3.6588
	39.7142	3.6627
	39.7492	3.6617
	39.7842	3.66
	39.8192	3.6549
	39.8542	3.6678
	39.8882	3.6638
	39.9232	3.6572
	39.9583	3.6564
	39.9933	3.6484
	40.0273	3.6581
	40.0623	3.6602
	40.0973	3.6643
	40.1323	3.6635
	40.1673	3.6732
	40.2013	3.665
	40.2353	3.6641
	40.2703	3.6614
	40.3033	3.6614
	40.3383	3.666
	40.3733	3.651
	40.4083	3.6549
	40.4423	3.666
	40.4773	3.6543
	40.5123	3.661
	40.5483	3.6638
	40.5823	3.6593
	40.6173	3.6551
	40.6523	3.6601
	40.6873	3.6682
	40.7213	3.6633
	40.7563	3.6514
	40.7913	3.6525
	40.8253	3.6633
	40.8603	3.6696
	40.8953	3.6541
	40.9303	3.6573
	40.9653	3.6653
	40.9993	3.6497
	41.0333	3.6617
	41.0683	3.6571
	41.1033	3.6655
	41.1383	3.668
	41.1733	3.665
	41.2083	3.6727
	41.2433	3.6673
	41.2773	3.6633
	41.3113	3.6758
	41.3453	3.6641
	41.3803	3.661
	41.4153	3.6588
	41.4483	3.6627
	41.4823	3.658
	41.5173	3.666
	41.5523	3.6554
	41.5873	3.6576
	41.6213	3.6519
	41.6563	3.6561
	41.6913	3.6657
	41.7264	3.6488
	41.7614	3.6653
	41.7964	3.6524
	41.8314	3.6481
	41.8664	3.6585
	41.9014	3.6517
	41.9364	3.6553
	41.9714	3.6538
	42.0064	3.6613
	42.0404	3.664
	42.0764	3.6539
	42.1114	3.6496
	42.1464	3.6633
	42.1814	3.6608
	42.2154	3.6578
	42.2494	3.6631
	42.2844	3.6613
	42.3184	3.6573
	42.3524	3.664
	42.3864	3.6624
	42.4214	3.665
	42.4554	3.6577
	42.4904	3.6641
	42.5254	3.6649
	42.5604	3.6536
	42.5954	3.6584
	42.6304	3.6596
	42.6644	3.6597
	42.6984	3.6654
	42.7334	3.6578
	42.7674	3.6672
	42.8024	3.6679
	42.8374	3.6648
	42.8734	3.6555
	42.9074	3.6542
	42.9434	3.6575
	42.9774	3.6697
	43.0114	3.6634
	43.0454	3.6638
	43.0794	3.6615
	43.1144	3.6551
	43.1494	3.6664
	43.1844	3.6732
	43.2184	3.6649
	43.2534	3.6599
	43.2874	3.6563
	43.3224	3.6636
	43.3574	3.6699
	43.3924	3.6632
	43.4264	3.6692
	43.4615	3.6528
	43.4955	3.662
	43.5305	3.6567
	43.5645	3.6638
	43.5985	3.6571
	43.6335	3.6616
	43.6685	3.6658
	43.7025	3.6682
	43.7375	3.6501
	43.7735	3.657
	43.8085	3.668
	43.8425	3.6676
	43.8785	3.656
	43.9145	3.6677
	43.9495	3.6724
	43.9845	3.668
	44.0195	3.6621
	44.0545	3.668
	44.0895	3.6625
	44.1245	3.6601
	44.1575	3.6636
	44.1925	3.6661
	44.2275	3.6638
	44.2615	3.6588
	44.2965	3.6648
	44.3315	3.6635
	44.3655	3.6712
	44.3995	3.6625
	44.4335	3.6621
	44.4675	3.6475
	44.5025	3.662
	44.5375	3.6547
	44.5725	3.6634
	44.6075	3.6625
	44.6415	3.662
	44.6765	3.6492
	44.7105	3.6589
	44.7445	3.6606
	44.7795	3.6605
	44.8145	3.6587
	44.8485	3.6553
	44.8845	3.6544
	44.9205	3.6496
	44.9555	3.6584
	44.9905	3.6473
	45.0255	3.6508
	45.0605	3.6526
	45.0955	3.6493
	45.1305	3.6545
	45.1655	3.6512
	45.2016	3.656
	45.2356	3.6433
	45.2716	3.6442
	45.3056	3.6508
	45.3396	3.6532
	45.3746	3.652
	45.4096	3.6576
	45.4446	3.653
	45.4806	3.657
	45.5146	3.6566
	45.5506	3.6474
	45.5866	3.6529
	45.6216	3.6601
	45.6566	3.6521
	45.6906	3.6479
	45.7256	3.6498
	45.7606	3.6539
	45.7956	3.6539
	45.8306	3.6554
	45.8656	3.644
	45.9016	3.65
	45.9366	3.6555
	45.9716	3.649
	46.0066	3.6598
	46.0416	3.6655
	46.0756	3.6528
	46.1106	3.6649
	46.1456	3.6669
	46.1796	3.6651
	46.2146	3.6718
	46.2496	3.6584
	46.2846	3.6595
	46.3196	3.6595
	46.3546	3.6501
	46.3886	3.6632
	46.4236	3.6624
	46.4586	3.6652
	46.4936	3.6754
	46.5276	3.6635
	46.5626	3.6721
	46.5976	3.6594
	46.6326	3.6634
	46.6676	3.6751
	46.7016	3.6728
	46.7356	3.6711
	46.7696	3.6706
	46.8046	3.671
	46.8396	3.6783
	46.8736	3.6806
	46.9086	3.676
	46.9437	3.681
	46.9797	3.6825
	47.0147	3.6815
	47.0497	3.6791
	47.0847	3.6772
	47.1187	3.6732
	47.1527	3.6765
	47.1867	3.6744
	47.2217	3.6692
	47.2557	3.6682
	47.2897	3.6642
	47.3247	3.6699
	47.3597	3.6649
	47.3947	3.6699
	47.4297	3.6671
	47.4647	3.6665
	47.4997	3.6707
	47.5347	3.6694
	47.5697	3.6755
	47.6047	3.6697
	47.6397	3.6701
	47.6747	3.6667
	47.7087	3.6673
	47.7437	3.6677
	47.7787	3.6756
	47.8147	3.6711
	47.8497	3.671
	47.8847	3.6621
	47.9197	3.6745
	47.9547	3.6707
	47.9897	3.6757
	48.0257	3.6752
	48.0607	3.6753
	48.0967	3.6724
	48.1307	3.6658
	48.1657	3.6667
	48.2007	3.6612
	48.2347	3.6707
	48.2697	3.67
	48.3047	3.668
	48.3397	3.6724
	48.3757	3.6666
	48.4107	3.672
	48.4457	3.6692
	48.4807	3.676
	48.5147	3.6701
	48.5497	3.6758
	48.5847	3.6778
	48.6197	3.6794
	48.6547	3.6821
	48.6888	3.6868
	48.7238	3.6833
	48.7598	3.6866
	48.7958	3.6874
	48.8298	3.6817
	48.8638	3.6848
	48.8988	3.6827
	48.9328	3.6879
	48.9668	3.6806
	49.0018	3.6844
	49.0368	3.6869
	49.0718	3.6798
	49.1068	3.6765
	49.1428	3.6811
	49.1778	3.677
	49.2128	3.6771
	49.2468	3.6799
	49.2808	3.6756
	49.3158	3.6754
	49.3498	3.6741
	49.3838	3.6707
	49.4178	3.6718
	49.4518	3.6742
	49.4868	3.6743
	49.5218	3.6687
	49.5568	3.6714
	49.5928	3.6615
	49.6278	3.6645
	49.6628	3.6648
	49.6978	3.6651
	49.7328	3.6629
	49.7678	3.6642
	49.8028	3.6642
	49.8378	3.6538
	49.8738	3.6586
	49.9098	3.666
	49.9438	3.6644
	49.9778	3.6652
	50.0128	3.6552
	50.0468	3.6585
	50.0818	3.6554
	50.1168	3.6559
	50.1508	3.6578
	50.1848	3.6493
	50.2198	3.649
	50.2548	3.6408
	50.2898	3.651
	50.3248	3.6615
	50.3598	3.6555
	50.3938	3.658
	50.4278	3.6577
	50.4619	3.6511
	50.4959	3.6465
	50.5309	3.655
	50.5649	3.6542
	50.5999	3.6528
	50.6349	3.6486
	50.6699	3.641
	50.7059	3.6487
	50.7409	3.6487
	50.7759	3.6496
	50.8109	3.659
	50.8459	3.6557
	50.8809	3.6462
	50.9159	3.6578
	50.9509	3.6426
	50.9869	3.6475
	51.0209	3.653
	51.0559	3.6489
	51.0909	3.6589
	51.1249	3.6561
	51.1599	3.6399
	51.1939	3.6562
	51.2289	3.6467
	51.2639	3.6611
	51.2989	3.6487
	51.3339	3.6614
	51.3699	3.6557
	51.4049	3.6435
	51.4389	3.6457
	51.4739	3.6504
	51.5079	3.6488
	51.5429	3.6494
	51.5769	3.6605
	51.6119	3.6621
	51.6469	3.6541
	51.6809	3.6469
	51.7149	3.6494
	51.7499	3.6512
	51.7849	3.651
	51.8209	3.649
	51.8549	3.6319
	51.8899	3.6478
	51.9249	3.6396
	51.9599	3.6398
	51.9949	3.6363
	52.0299	3.6358
	52.0649	3.6358
	52.0999	3.6346
	52.1359	3.6386
	52.1699	3.6405
	52.205	3.6314
	52.239	3.6343
	52.274	3.6353
	52.308	3.6254
	52.343	3.6364
	52.378	3.6235
	52.413	3.628
	52.448	3.6221
	52.483	3.6212
	52.519	3.6179
	52.554	3.6126
	52.588	3.6228
	52.623	3.6216
	52.658	3.6176
	52.693	3.622
	52.728	3.6201
	52.763	3.6185
	52.799	3.6318
	52.835	3.619
	52.869	3.6234
	52.904	3.6257
	52.939	3.6242
	52.974	3.6329
	53.009	3.6243
	53.043	3.6128
	53.078	3.6264
	53.112	3.6248
	53.148	3.6161
	53.182	3.6308
	53.217	3.6263
	53.252	3.6193
	53.286	3.6263
	53.32	3.6248
	53.355	3.6331
	53.39	3.6311
	53.426	3.6303
	53.46	3.6357
	53.496	3.6202
	53.531	3.6192
	53.566	3.6226
	53.601	3.6167
	53.636	3.6198
	53.67	3.6213
	53.705	3.6176
	53.74	3.6328
	53.774	3.6268
	53.809	3.6255
	53.844	3.623
	53.878	3.634
	53.913	3.626
	53.9481	3.632
	53.9831	3.6325
	54.0181	3.625
	54.0531	3.629
	54.0891	3.628
	54.1241	3.6349
	54.1591	3.625
	54.1941	3.6338
	54.2291	3.6217
	54.2641	3.635
	54.2991	3.6253
	54.3341	3.6303
	54.3691	3.6303
	54.4041	3.6323
	54.4391	3.6369
	54.4741	3.6222
	54.5091	3.6234
	54.5441	3.6108
	54.5791	3.6307
	54.6141	3.6244
	54.6491	3.6289
	54.6841	3.6262
	54.7181	3.6244
	54.7531	3.6109
	54.7881	3.6198
	54.8231	3.6326
	54.8581	3.6221
	54.8931	3.6233
	54.9281	3.6249
	54.9631	3.6287
	54.9981	3.6231
	55.0321	3.6191
	55.0671	3.6216
	55.1021	3.6351
	55.1371	3.6351
	55.1721	3.639
	55.2071	3.6351
	55.2421	3.6327
	55.2771	3.639
	55.3121	3.636
	55.3471	3.6253
	55.3821	3.6384
	55.4161	3.6368
	55.4501	3.6372
	55.4851	3.6348
	55.5191	3.6234
	55.5541	3.6431
	55.5891	3.6401
	55.6261	3.6433
	55.6621	3.6384
	55.6972	3.6411
	55.7312	3.6443
	55.7662	3.6351
	55.8012	3.6433
	55.8362	3.6426
	55.8712	3.6419
	55.9052	3.6385
	55.9412	3.628
	55.9772	3.6334
	56.0122	3.6355
	56.0472	3.6365
	56.0822	3.6415
	56.1182	3.6281
	56.1522	3.6446
	56.1862	3.6342
	56.2212	3.638
	56.2582	3.6356
	56.2922	3.6406
	56.3272	3.638
	56.3622	3.6397
	56.3962	3.6496
	56.4312	3.6425
	56.4662	3.6419
	56.5012	3.642
	56.5362	3.644
	56.5712	3.6339
	56.6062	3.6429
	56.6412	3.6404
	56.6752	3.637
	56.7102	3.6438
	56.7442	3.6409
	56.7782	3.6379
	56.8122	3.6409
	56.8472	3.6409
	56.8822	3.6428
	56.9172	3.6277
	56.9512	3.6367
	56.9862	3.6428
	57.0202	3.6465
	57.0552	3.6411
	57.0902	3.6389
	57.1252	3.6414
	57.1602	3.6423
	57.1952	3.6418
	57.2302	3.6438
	57.2642	3.6446
	57.2992	3.6379
	57.3342	3.6325
	57.3692	3.6409
	57.4042	3.6426
	57.4393	3.6326
	57.4743	3.6275
	57.5083	3.6312
	57.5433	3.6446
	57.5783	3.6344
	57.6123	3.6271
	57.6473	3.6369
	57.6813	3.6425
	57.7163	3.6374
	57.7513	3.6402
	57.7873	3.6431
	57.8233	3.6265
	57.8583	3.6419
	57.8933	3.6411
	57.9283	3.643
	57.9623	3.6412
	57.9973	3.6366
	58.0323	3.6386
	58.0663	3.635
	58.1013	3.631
	58.1373	3.6408
	58.1733	3.6336
	58.2083	3.6336
	58.2433	3.646
	58.2773	3.6418
	58.3113	3.633
	58.3463	3.6384
	58.3823	3.6423
	58.4163	3.6498
	58.4533	3.6412
	58.4893	3.6446
	58.5243	3.6457
	58.5583	3.6471
	58.5933	3.6532
	58.6283	3.6418
	58.6633	3.6343
	58.6983	3.641
	58.7343	3.6348
	58.7713	3.6409
	58.8053	3.6434
	58.8403	3.6294
	58.8743	3.6221
	58.9093	3.6328
	58.9433	3.6346
	58.9783	3.6293
	59.0133	3.6289
	59.0483	3.6253
	59.0833	3.6212
	59.1183	3.6225
	59.1543	3.6127
	59.1894	3.6128
	59.2234	3.616
	59.2584	3.6094
	59.2934	3.6144
	59.3284	3.6102
	59.3634	3.6182
	59.3984	3.6267
	59.4344	3.6271
	59.4694	3.6232
	59.5044	3.6139
	59.5384	3.6237
	59.5724	3.6203
	59.6074	3.6302
	59.6424	3.6183
	59.6774	3.6294
	59.7114	3.6206
	59.7474	3.6184
	59.7824	3.625
	59.8184	3.6184
	59.8534	3.6145
	59.8884	3.6261
	59.9224	3.6281
	59.9574	3.6266
	59.9924	3.6398
	60.0264	3.6334
	60.0614	3.6374
	60.0964	3.6366
	60.1324	3.6438
	60.1674	3.6504
	60.2024	3.6454
	60.2374	3.6419
	60.2714	3.6384
	60.3064	3.6361
	60.3414	3.6494
	60.3764	3.6597
	60.4114	3.6611
	60.4464	3.6624
	60.4814	3.6698
	60.5164	3.6476
	60.5514	3.6715
	60.5864	3.6717
	60.6214	3.6659
	60.6564	3.6627
	60.6914	3.6587
	60.7264	3.6567
	60.7614	3.6634
	60.7964	3.6529
	60.8324	3.6653
	60.8674	3.6629
	60.9024	3.6653
	60.9375	3.656
	60.9725	3.6617
	61.0075	3.6538
	61.0425	3.6507
	61.0775	3.6546
	61.1125	3.6563
	61.1485	3.6524
	61.1835	3.6499
	61.2185	3.6567
	61.2525	3.6497
	61.2875	3.6514
	61.3225	3.6516
	61.3575	3.6496
	61.3925	3.6473
	61.4275	3.6453
	61.4635	3.6505
	61.4995	3.662
	61.5335	3.6678
	61.5675	3.6555
	61.6025	3.6601
	61.6375	3.6629
	61.6725	3.6527
	61.7075	3.6569
	61.7415	3.6621
	61.7775	3.6611
	61.8135	3.6552
	61.8475	3.6778
	61.8825	3.6653
	61.9185	3.6586
	61.9535	3.6557
	61.9885	3.6622
	62.0235	3.6574
	62.0575	3.671
	62.0925	3.6608
	62.1275	3.6644
	62.1635	3.6484
	62.1985	3.6572
	62.2325	3.6597
	62.2665	3.6681
	62.3005	3.6625
	62.3355	3.6737
	62.3705	3.6796
	62.4055	3.6825
	62.4395	3.677
	62.4755	3.6709
	62.5115	3.6633
	62.5465	3.667
	62.5795	3.6685
	62.6145	3.6658
	62.6495	3.6617
	62.6836	3.6615
	62.7186	3.676
	62.7536	3.6707
	62.7886	3.6652
	62.8246	3.6684
	62.8606	3.6685
	62.8956	3.6566
	62.9296	3.6621
	62.9646	3.667
	62.9996	3.6597
	63.0346	3.6664
	63.0696	3.6594
	63.1046	3.6596
	63.1406	3.6586
	63.1756	3.6674
	63.2106	3.6534
	63.2456	3.6578
	63.2806	3.6621
	63.3156	3.6606
	63.3876	3.6551
	63.4236	3.6561
	63.4576	3.6544
	63.4926	3.6563
	63.5276	3.646
	63.5616	3.657
	63.5956	3.6542
	63.6306	3.6581
	63.6656	3.66
	63.7006	3.6474
	63.7356	3.6487
	63.7696	3.6412
	63.8056	3.6443
	63.8416	3.6648
	63.8766	3.6406
	63.9116	3.6647
	63.9456	3.6493
	63.9806	3.6488
	64.0156	3.6527
	64.0506	3.6499
	64.0856	3.6615
	64.1216	3.6637
	64.1576	3.658
	64.1926	3.6561
	64.2276	3.6597
	64.2626	3.667
	64.2976	3.658
	64.3326	3.6587
	64.3676	3.6498
	64.4026	3.6609
	64.4377	3.6536
	64.4737	3.6608
	64.5077	3.6645
	64.5417	3.6605
	64.5777	3.6632
	64.6127	3.6526
	64.6477	3.6698
	64.6827	3.6617
	64.7177	3.6556
	64.7537	3.6526
	64.7897	3.6709
	64.8247	3.6609
	64.8597	3.661
	64.8937	3.6701
	64.9287	3.668
	64.9637	3.6643
	64.9987	3.6566
	65.0327	3.6732
	65.0677	3.6569
	65.1037	3.6625
	65.1397	3.6618
	65.1747	3.6684
	65.2097	3.6657
	65.2447	3.6719
	65.2797	3.677
	65.3157	3.6779
	65.3517	3.6779
	65.3867	3.681
	65.4227	3.6778
	65.4567	3.6776
	65.4907	3.6745
	65.5247	3.6839
	65.5597	3.6786
	65.5947	3.6732
	65.6297	3.6714
	65.6657	3.6639
	65.7007	3.6668
	65.7357	3.6715
	65.7707	3.6616
	65.8057	3.6664
	65.8407	3.6731
	65.8757	3.6644
	65.9107	3.6731
	65.9447	3.6604
	65.9797	3.6596
	66.0147	3.6539
	66.0507	3.6639
	66.0867	3.659
	66.1217	3.6652
	66.1567	3.6621
	66.1918	3.6684
	66.2278	3.6597
	66.2618	3.6725
	66.2968	3.6694
	66.3338	3.6639
	66.3698	3.6671
	66.4048	3.6707
	66.4408	3.6703
	66.4758	3.6681
	66.5108	3.6678
	66.5458	3.67
	66.5828	3.6684
	66.6188	3.6661
	66.6538	3.6683
	66.6888	3.6648
	66.7238	3.6696
	66.7588	3.6673
	66.7928	3.6602
	66.8288	3.6652
	66.8648	3.665
	66.9008	3.6723
	66.9358	3.6572
	66.9708	3.6712
	67.0058	3.6674
	67.0418	3.665
	67.0758	3.6619
	67.1108	3.6553
	67.1458	3.6633
	67.1818	3.6565
	67.2178	3.6593
	67.2528	3.669
	67.2878	3.6502
	67.3228	3.6543
	67.3588	3.6553
	67.3928	3.6559
	67.4268	3.6538
	67.4628	3.6573
	67.4968	3.6709
	67.5318	3.659
	67.5658	3.6567
	67.6008	3.6526
	67.6348	3.6584
	67.6698	3.6577
	67.7038	3.6585
	67.7378	3.6593
	67.7728	3.6534
	67.8078	3.6678
	67.8428	3.6546
	67.8788	3.6548
	67.9128	3.6646
	67.9479	3.6705
	67.9829	3.6696
	68.0179	3.6667
	68.0529	3.667
	68.0879	3.6638
	68.1229	3.6715
	68.1579	3.6672
	68.1929	3.672
	68.2289	3.6658
	68.2639	3.6731
	68.2989	3.6722
	68.3329	3.6654
	68.3689	3.6704
	68.4039	3.6752
	68.4389	3.6763
	68.4739	3.6758
	68.5079	3.6832
	68.5439	3.6717
	68.5789	3.674
	68.6149	3.6744
	68.6489	3.6701
	68.6839	3.67
	68.7189	3.6832
	68.7539	3.6695
	68.7889	3.6595
	68.8239	3.6648
	68.8599	3.6667
	68.8949	3.6652
	68.9299	3.6675
	68.9649	3.6719
	68.9999	3.6716
	69.0349	3.665
	69.0699	3.6547
	69.1049	3.6558
	69.1399	3.6584
	69.1759	3.6546
	69.2119	3.6647
	69.2469	3.6605
	69.2819	3.6633
	69.3169	3.6775
	69.3519	3.6595
	69.3879	3.6691
	69.4229	3.6717
	69.4579	3.6682
	69.4929	3.6595
	69.5269	3.6593
	69.5609	3.6625
	69.5959	3.6583
	69.6299	3.6637
	69.6629	3.6548
	69.698	3.6519
	69.732	3.6664
	69.767	3.6598
[truncated: 10,867 more rows]
