# Supplementary material for: A new insight into RecA filament regulation by RecX from the analysis of conformation-specific interactions
Source: eLife. 2022 Jun 22;11:e78409. doi: 10.7554/eLife.78409 (PMC9252578; doi:10.7554/eLife.78409)
Supplement: Figure 3—figure supplement 2—source data 1. [file elife-78409-fig3-figsupp2-data1.xlsx]

## Sheet: 1
	Time, s	Length, µm
	0	4.0215
	0.035	4.03
	0.07	4.0319
	0.105	4.0164
	0.141	4.0214
	0.177	4.0359
	0.211	4.0288
	0.246	4.0319
	0.281	4.0296
	0.316	4.0299
	0.351	4.0335
	0.386	4.037
	0.421	4.0373
	0.457	4.0402
	0.492	4.0489
	0.527	4.0473
	0.562	4.0397
	0.597	4.0453
	0.632	4.0464
	0.667	4.0453
	0.703	4.0518
	0.737	4.0486
	0.773	4.0464
	0.8091	4.0446
	0.8441	4.0385
	0.8791	4.0352
	0.9131	4.0436
	0.9481	4.0445
	0.9831	4.0442
	1.0181	4.037
	1.0531	4.0468
	1.0891	4.035
	1.1251	4.0304
	1.1591	4.0358
	1.1931	4.0328
	1.2281	4.0294
	1.2631	4.0396
	1.2981	4.0425
	1.3331	4.041
	1.3681	4.0365
	1.4041	4.0387
	1.4391	4.0474
	1.4741	4.0396
	1.5091	4.0399
	1.5441	4.0361
	1.5791	4.0446
	1.6141	4.0499
	1.6491	4.0487
	1.6841	4.0462
	1.7201	4.0483
	1.7551	4.045
	1.7911	4.0382
	1.8261	4.0464
	1.8611	4.0605
	1.8961	4.0551
	1.9311	4.0588
	1.9661	4.0613
	2.0011	4.0522
	2.0361	4.0696
	2.0701	4.0551
	2.1061	4.0673
	2.1401	4.0622
	2.1751	4.0684
	2.2101	4.0691
	2.2451	4.0678
	2.2801	4.0678
	2.3151	4.0739
	2.3491	4.0745
	2.3851	4.067
	2.4211	4.0747
	2.4561	4.0704
	2.4911	4.0688
	2.5261	4.0706
	2.5612	4.0787
	2.5962	4.0649
	2.6312	4.0756
	2.6662	4.0795
	2.7022	4.0841
	2.7372	4.089
	2.7722	4.0787
	2.8072	4.0811
	2.8432	4.0708
	2.8792	4.0771
	2.9132	4.0781
	2.9482	4.0766
	2.9842	4.073
	3.0192	4.0737
	3.0542	4.0729
	3.0882	4.0742
	3.1232	4.0695
	3.1582	4.0637
	3.1922	4.0587
	3.2272	4.0587
	3.2622	4.0579
	3.2962	4.0693
	3.3312	4.0728
	3.3662	4.0583
	3.4022	4.0525
	3.4362	4.0577
	3.4712	4.0611
	3.5062	4.0682
	3.5412	4.0632
	3.5762	4.0543
	3.6112	4.051
	3.6462	4.0601
	3.6822	4.0614
	3.7182	4.0583
	3.7532	4.0782
	3.7872	4.0701
	3.8222	4.0819
	3.8572	4.0775
	3.8922	4.068
	3.9272	4.0716
	3.9622	4.0738
	3.9982	4.0638
	4.0342	4.0687
	4.0692	4.0769
	4.1042	4.0778
	4.1392	4.0797
	4.1742	4.0693
	4.2092	4.0657
	4.2442	4.0742
	4.2782	4.0744
	4.3143	4.0678
	4.3503	4.0654
	4.3843	4.0575
	4.4193	4.0671
	4.4533	4.0606
	4.4883	4.0642
	4.5223	4.0559
	4.5563	4.0701
	4.5913	4.0512
	4.6263	4.0605
	4.6613	4.0532
	4.6963	4.0579
	4.7313	4.059
	4.7663	4.0616
	4.8013	4.048
	4.8373	4.0704
	4.8713	4.0681
	4.9063	4.0646
	4.9413	4.0597
	4.9763	4.0706
	5.0123	4.0579
	5.0473	4.0626
	5.0823	4.0676
	5.1163	4.0621
	5.1513	4.0615
	5.1863	4.0579
	5.2213	4.0622
	5.2563	4.0736
	5.2913	4.0594
	5.3263	4.0596
	5.3623	4.0601
	5.3983	4.0756
	5.4333	4.0776
	5.4683	4.0633
	5.5033	4.0609
	5.5383	4.0587
	5.5733	4.0606
	5.6083	4.058
	5.6443	4.0677
	5.6803	4.0593
	5.7153	4.0621
	5.7503	4.0748
	5.7853	4.0696
	5.8203	4.0652
	5.8553	4.0703
	5.8903	4.0751
	5.9263	4.0778
	5.9613	4.0712
	5.9973	4.066
	6.0324	4.0568
	6.0674	4.0669
	6.1024	4.0647
	6.1374	4.0583
	6.1724	4.0671
	6.2074	4.0608
	6.2434	4.0443
	6.2774	4.054
	6.3124	4.0503
	6.3474	4.0652
	6.3824	4.0603
	6.4184	4.0584
	6.4524	4.0545
	6.4874	4.0477
	6.5224	4.057
	6.5564	4.0485
	6.5914	4.0446
	6.6264	4.0595
	6.6614	4.0479
	6.6964	4.0459
	6.7314	4.0412
	6.7664	4.0478
	6.8014	4.0436
	6.8364	4.0511
	6.8714	4.0478
	6.9054	4.0526
	6.9414	4.0487
	6.9774	4.0521
	7.0114	4.041
	7.0454	4.0537
	7.0804	4.0491
	7.1154	4.0476
	7.1504	4.0553
	7.1854	4.0559
	7.2194	4.0617
	7.2544	4.0554
	7.2904	4.0563
	7.3264	4.0573
	7.3604	4.0634
	7.3954	4.0691
	7.4304	4.0604
	7.4654	4.0663
	7.4994	4.0653
	7.5344	4.0659
	7.5694	4.0791
	7.6034	4.0673
	7.6394	4.0521
	7.6754	4.061
	7.7094	4.0564
	7.7444	4.0784
	7.7795	4.0707
	7.8135	4.0712
	7.8485	4.0678
	7.8835	4.0746
	7.9185	4.07
	7.9535	4.075
	7.9895	4.0755
	8.0245	4.0781
	8.0595	4.0768
	8.0935	4.0779
	8.1285	4.0784
	8.1635	4.0706
	8.1985	4.0824
	8.2335	4.0874
	8.2685	4.0853
	8.3055	4.0746
	8.3395	4.0781
	8.3745	4.077
	8.4085	4.0807
	8.4435	4.0838
	8.4785	4.0836
	8.5125	4.0729
	8.5475	4.0797
	8.5825	4.0837
	8.6175	4.0826
	8.6525	4.0841
	8.6875	4.0885
	8.7235	4.074
	8.7595	4.0801
	8.7955	4.079
	8.8325	4.0795
	8.8685	4.0773
	8.9035	4.0769
	8.9395	4.0752
	8.9745	4.0737
	9.0095	4.0708
	9.0445	4.079
	9.0795	4.0803
	9.1145	4.0748
	9.1495	4.0781
	9.1845	4.0785
	9.2195	4.0756
	9.2555	4.0777
	9.2895	4.0786
	9.3245	4.0784
	9.3595	4.0815
	9.3945	4.0804
	9.4295	4.0691
	9.4645	4.0796
	9.5005	4.0761
	9.5356	4.0838
	9.5716	4.0758
	9.6066	4.0758
	9.6416	4.0926
	9.6766	4.0799
	9.7116	4.0819
	9.7466	4.0793
	9.7816	4.0733
	9.8176	4.0759
	9.8536	4.0716
	9.8886	4.073
	9.9236	4.0655
	9.9576	4.0746
	9.9926	4.0682
	10.0276	4.0718
	10.0626	4.0675
	10.0976	4.0688
	10.1336	4.0632
	10.1686	4.0716
	10.2036	4.0728
	10.2386	4.0747
	10.2736	4.077
	10.3086	4.0831
	10.3426	4.0762
	10.3776	4.0779
	10.4126	4.0775
	10.4486	4.0688
	10.4846	4.0679
	10.5186	4.0746
	10.5536	4.0657
	10.5876	4.0653
	10.6226	4.0658
	10.6576	4.0676
	10.6916	4.064
	10.7266	4.0663
	10.7616	4.0618
	10.7966	4.062
	10.8316	4.0692
	10.8666	4.0673
	10.9016	4.0662
	10.9366	4.065
	10.9706	4.055
	11.0056	4.0486
	11.0396	4.0499
	11.0746	4.0504
	11.1096	4.0643
	11.1446	4.0519
	11.1816	4.0509
	11.2156	4.0493
	11.2506	4.0467
	11.2857	4.0362
	11.3207	4.0427
	11.3547	4.0451
	11.3897	4.046
	11.4247	4.0443
	11.4597	4.0417
	11.4947	4.0546
	11.5307	4.0427
	11.5667	4.0407
	11.6017	4.0426
	11.6367	4.0433
	11.6717	4.0454
	11.7067	4.0357
	11.7417	4.0526
	11.7757	4.0464
	11.8117	4.042
	11.8467	4.045
	11.8827	4.0466
	11.9177	4.0414
	11.9527	4.0504
	11.9877	4.0465
	12.0227	4.0375
	12.0567	4.0341
	12.0917	4.0332
	12.1277	4.0339
	12.1617	4.0385
	12.1977	4.0399
	12.2327	4.0352
	12.2677	4.0438
	12.3027	4.0425
	12.3377	4.0417
	12.3727	4.0403
	12.4077	4.0457
	12.4437	4.0412
	12.4787	4.0447
	12.5147	4.0356
	12.5487	4.0502
	12.5837	4.0392
	12.6187	4.0532
	12.6527	4.0583
	12.6877	4.0518
	12.7227	4.0538
	12.7577	4.0538
	12.7937	4.06
	12.8297	4.0602
	12.8647	4.0652
	12.8997	4.0621
	12.9357	4.0726
	12.9707	4.0708
	13.0057	4.0649
	13.0398	4.0787
	13.0758	4.0762
	13.1118	4.0667
	13.1468	4.0771
	13.1818	4.0777
	13.2168	4.0769
	13.2518	4.082
	13.2868	4.0881
	13.3218	4.0914
	13.3558	4.0864
	13.3918	4.0763
	13.4278	4.093
	13.4628	4.085
	13.4968	4.0956
	13.5318	4.0872
	13.5668	4.099
	13.6018	4.0986
	13.6368	4.102
	13.6718	4.0889
	13.7058	4.1021
	13.7418	4.0907
	13.7768	4.0898
	13.8118	4.0939
	13.8468	4.0787
	13.8818	4.0806
	13.9168	4.0752
	13.9518	4.085
	13.9858	4.0887
	14.0208	4.0755
	14.0568	4.0781
	14.0928	4.0694
	14.1278	4.08
	14.1628	4.0753
	14.1978	4.0595
	14.2328	4.076
	14.2678	4.0663
	14.3028	4.0747
	14.3378	4.0638
	14.3728	4.0664
	14.4078	4.0602
	14.4428	4.0692
	14.4778	4.0715
	14.5128	4.0694
	14.5478	4.0725
	14.5828	4.0688
	14.6178	4.0727
	14.6528	4.0732
	14.6878	4.0583
	14.7228	4.0568
	14.7588	4.0624
	14.7939	4.0631
	14.8289	4.0523
	14.8639	4.05
	14.8979	4.0526
	14.9329	4.0412
	14.9679	4.0534
	15.0029	4.0582
	15.0389	4.0519
	15.0749	4.0563
	15.1089	4.0546
	15.1439	4.062
	15.1789	4.0619
	15.2129	4.0576
	15.2479	4.0454
	15.2829	4.0451
	15.3179	4.0553
	15.3549	4.0595
	15.3889	4.0394
	15.4239	4.0388
	15.4579	4.0488
	15.4929	4.0477
	15.5269	4.0512
	15.5619	4.0496
	15.5969	4.0368
	15.6319	4.0436
	15.6669	4.0484
	15.7009	4.0523
	15.7369	4.0492
	15.7729	4.049
	15.8069	4.0501
	15.8419	4.0578
	15.8759	4.0505
	15.9109	4.0458
	15.9459	4.0629
	15.9809	4.045
	16.0159	4.0523
	16.0509	4.0533
	16.0869	4.0411
	16.1229	4.0385
	16.1579	4.0387
	16.1929	4.0483
	16.2279	4.0481
	16.2629	4.0504
	16.2979	4.0513
	16.3329	4.0473
	16.3679	4.0496
	16.4029	4.0442
	16.4389	4.0515
	16.4729	4.0452
	16.5079	4.0552
	16.543	4.0511
	16.577	4.0635
	16.612	4.0651
	16.646	4.0571
	16.681	4.0521
	16.718	4.0554
	16.752	4.0667
	16.788	4.0499
	16.823	4.0472
	16.857	4.049
	16.892	4.0682
	16.927	4.0465
	16.962	4.0539
	16.997	4.0492
	17.034	4.0547
	17.07	4.0543
	17.104	4.0533
	17.139	4.0544
	17.174	4.0551
	17.209	4.0531
	17.244	4.0541
	17.278	4.0485
	17.313	4.0407
	17.348	4.0451
	17.383	4.0374
	17.417	4.0397
	17.453	4.0295
	17.487	4.03
	17.521	4.0242
	17.556	4.0394
	17.591	4.0438
	17.626	4.0409
	17.661	4.0385
	17.697	4.0427
	17.732	4.0397
	17.767	4.0328
	17.802	4.0463
	17.836	4.0376
	17.871	4.0497
	17.905	4.045
	17.94	4.046
	17.975	4.0466
	18.01	4.051
	18.045	4.0509
	18.081	4.0642
	18.115	4.0649
	18.15	4.0598
	18.185	4.058
	18.219	4.0604
	18.254	4.0543
	18.2881	4.059
	18.3231	4.0693
	18.3581	4.0644
	18.3921	4.0742
	18.4271	4.0621
	18.4631	4.0619
	18.4971	4.0603
	18.5331	4.0598
	18.5671	4.0604
	18.6021	4.0596
	18.6371	4.0548
	18.6721	4.0533
	18.7071	4.0547
	18.7421	4.0487
	18.7761	4.0413
	18.8121	4.045
	18.8481	4.0447
	18.8821	4.0456
	18.9171	4.041
	18.9521	4.0426
	18.9871	4.0369
	19.0221	4.0442
	19.0571	4.0514
	19.0921	4.0472
	19.1281	4.0406
	19.1641	4.044
	19.1991	4.0556
	19.2341	4.0545
	19.2691	4.0479
	19.3041	4.0542
	19.3391	4.0569
	19.3741	4.0539
	19.4101	4.0501
	19.4451	4.0548
	19.4801	4.0582
	19.5151	4.062
	19.5501	4.0635
	19.5851	4.0593
	19.6201	4.0608
	19.6551	4.0681
	19.6901	4.0562
	19.7261	4.0632
	19.7611	4.0535
	19.7971	4.0637
	19.8311	4.0614
	19.8661	4.0586
	19.9001	4.0607
	19.9351	4.0507
	19.9701	4.0513
	20.0051	4.0455
	20.0402	4.054
	20.0762	4.051
	20.1122	4.0473
	20.1482	4.0462
	20.1822	4.0404
	20.2172	4.0455
	20.2522	4.0375
	20.2872	4.0396
	20.3222	4.0369
	20.3582	4.0399
	20.3932	4.0451
	20.4282	4.0524
	20.4632	4.0414
	20.4982	4.0422
	20.5332	4.0448
	20.5682	4.0301
	20.6032	4.0304
	20.6382	4.0298
	20.6732	4.0143
	20.7082	4.0156
	20.7432	4.0107
	20.7782	4.0154
	20.8132	4.0246
	20.8482	4.0132
	20.8822	4.0184
	20.9172	4.0231
	20.9512	4.0142
	20.9862	4.0189
	21.0212	4.0264
	21.0572	4.027
	21.0932	4.0198
	21.1272	4.0071
	21.1622	4.02
	21.1962	4.018
	21.2312	4.0186
	21.2662	4.0273
	21.3002	4.0154
	21.3352	4.0162
	21.3692	4.0271
	21.4052	4.0283
	21.4402	4.0288
	21.4752	4.0309
	21.5102	4.0328
	21.5452	4.0346
	21.5802	4.0328
	21.6152	4.0386
	21.6502	4.0433
	21.6852	4.0413
	21.7202	4.0357
	21.7562	4.0423
	21.7913	4.0398
	21.8253	4.0417
	21.8603	4.0317
	21.8953	4.031
	21.9303	4.0194
	21.9653	4.0186
	22.0003	4.0147
	22.0353	4.0182
	22.0713	4.0207
	22.1073	4.0159
	22.1413	4.0199
	22.1763	4.0198
	22.2113	4.0188
	22.2463	4.0244
	22.2813	4.0117
	22.3163	4.0215
	22.3513	4.0207
	22.3873	4.0171
	22.4233	4.0348
	22.4573	4.0181
	22.4923	4.0187
	22.5273	4.0157
	22.5623	4.0197
	22.5973	4.0225
	22.6323	4.029
	22.6673	4.0321
	22.7023	4.0439
	22.7373	4.0442
	22.7733	4.0392
	22.8073	4.0381
	22.8423	4.0465
	22.8773	4.0408
	22.9123	4.0457
	22.9473	4.0401
	22.9823	4.0437
	23.0183	4.0383
	23.0533	4.0339
	23.0893	4.0373
	23.1233	4.043
	23.1593	4.0354
	23.1953	4.0368
	23.2293	4.0311
	23.2643	4.0472
	23.2993	4.0413
	23.3343	4.034
	23.3703	4.0457
	23.4053	4.0449
	23.4403	4.0443
	23.4753	4.0419
	23.5103	4.0363
	23.5454	4.0421
	23.5804	4.0385
	23.6154	4.0459
	23.6514	4.0383
	23.6864	4.0415
	23.7214	4.0461
	23.7564	4.0441
	23.7914	4.055
	23.8264	4.0452
	23.8614	4.0464
	23.8964	4.0312
	23.9324	4.0466
	23.9684	4.0472
	24.0034	4.0435
	24.0384	4.0405
	24.0734	4.0353
	24.1074	4.0508
	24.1424	4.0514
	24.1774	4.0413
	24.2124	4.0496
	24.2484	4.0353
	24.2834	4.0331
	24.3184	4.0289
	24.3534	4.0385
	24.3884	4.028
	24.4234	4.0262
	24.4584	4.0215
	24.4934	4.0412
	24.5284	4.0305
	24.5644	4.0292
	24.6004	4.0303
	24.6354	4.0341
	24.6704	4.0452
	24.7054	4.0394
	24.7394	4.0366
	24.7744	4.0329
	24.8094	4.0429
	24.8444	4.038
	24.8804	4.0311
	24.9154	4.029
	24.9504	4.0425
	24.9854	4.0474
	25.0204	4.0533
	25.0554	4.0481
	25.0904	4.0387
	25.1254	4.0529
	25.1604	4.0484
	25.1974	4.0507
	25.2314	4.0501
	25.3045	4.0606
	25.3395	4.0529
	25.3745	4.0665
	25.4095	4.0586
	25.4455	4.0658
	25.4795	4.0587
	25.5155	4.0603
	25.5505	4.0625
	25.5845	4.0671
	25.6195	4.0807
	25.6545	4.0735
	25.6905	4.0734
	25.7245	4.0766
	25.7595	4.0771
	25.7935	4.0811
	25.8295	4.079
	25.8645	4.0703
	25.8995	4.0821
	25.9335	4.0792
	25.9685	4.0722
	26.0025	4.0619
	26.0375	4.0758
	26.0725	4.0669
	26.1075	4.0698
	26.1415	4.0637
	26.1775	4.068
	26.2135	4.0549
	26.2485	4.0614
	26.2835	4.0634
	26.3185	4.0712
	26.3535	4.0651
	26.3885	4.0562
	26.4235	4.0685
	26.4585	4.0607
	26.4935	4.0657
	26.5285	4.0612
	26.5635	4.0673
	26.5985	4.048
	26.6325	4.054
	26.6675	4.0437
	26.7025	4.0483
	26.7385	4.0397
	26.7725	4.0446
	26.8085	4.0414
	26.8435	4.0434
	26.8795	4.0392
	26.9145	4.0388
	26.9495	4.0305
	26.9835	4.0342
	27.0186	4.0411
	27.0526	4.0474
	27.0876	4.0416
	27.1226	4.0482
	27.1586	4.0456
	27.1936	4.044
	27.2286	4.0447
	27.2636	4.0476
	27.2986	4.047
	27.3336	4.0372
	27.3686	4.0459
	27.4036	4.0407
	27.4386	4.0361
	27.4736	4.0429
	27.5086	4.0463
	27.5446	4.0578
	27.5786	4.0467
	27.6136	4.0393
	27.6486	4.0513
	27.6836	4.0561
	27.7186	4.0456
	27.7536	4.043
	27.7886	4.0447
	27.8246	4.0436
	27.8586	4.0479
	27.8946	4.0516
	27.9286	4.0493
	27.9636	4.046
	27.9986	4.0452
	28.0336	4.0368
	28.0686	4.0468
	28.1036	4.049
	28.1396	4.0426
	28.1756	4.0462
	28.2106	4.037
	28.2456	4.0353
	28.2806	4.0278
	28.3156	4.0364
	28.3506	4.0339
	28.3856	4.0304
	28.4206	4.0345
	28.4566	4.0349
	28.4926	4.0287
	28.5276	4.0415
	28.5616	4.0287
	28.5966	4.0386
	28.6316	4.0316
	28.6656	4.0281
	28.7006	4.0213
	28.7356	4.0152
	28.7707	4.0093
	28.8067	3.9976
	28.8417	3.9941
	28.8767	3.9814
	28.9117	3.9817
	28.9467	3.9666
	28.9817	3.9685
	29.0167	3.9674
	29.0517	3.946
	29.0877	3.9382
	29.1237	3.9332
	29.1587	3.9186
	29.1927	3.9031
	29.2277	3.892
	29.2627	3.8799
	29.2977	3.8562
	29.3327	3.8474
	29.3677	3.8268
	29.4037	3.8066
	29.4377	3.7894
	29.4727	3.7695
	29.5077	3.7566
	29.5417	3.7381
	29.5767	3.7267
	29.6117	3.7107
	29.6467	3.6882
	29.6807	3.6796
	29.7157	3.6569
	29.7497	3.634
	29.7847	3.6339
	29.8197	3.6188
	29.8547	3.5953
	29.8897	3.5818
	29.9247	3.578
	29.9597	3.557
	29.9947	3.5495
	30.0297	3.5278
	30.0647	3.5266
	30.1007	3.5144
	30.1357	3.4945
	30.1717	3.4816
	30.2067	3.4714
	30.2417	3.455
	30.2767	3.4457
	30.3117	3.43
	30.3467	3.4292
	30.3817	3.4125
	30.4177	3.4066
	30.4537	3.3953
	30.4887	3.3835
	30.5238	3.3675
	30.5588	3.3556
	30.5938	3.3488
	30.6288	3.3405
	30.6638	3.3418
	30.7008	3.3298
	30.7368	3.323
	30.7718	3.3107
	30.8068	3.314
	30.8418	3.3084
	30.8758	3.2822
	30.9108	3.2885
	30.9458	3.282
	30.9808	3.2835
	31.0168	3.2885
	31.0528	3.2759
	31.0878	3.2737
	31.1228	3.2802
	31.1578	3.279
	31.1928	3.2791
	31.2268	3.2743
	31.2618	3.2673
	31.2978	3.2692
	31.3328	3.2625
	31.3688	3.2513
	31.4038	3.2588
	31.4378	3.2656
	31.4728	3.2665
	31.5078	3.2595
	31.5428	3.2603
	31.5768	3.2569
	31.6118	3.2519
	31.6478	3.2469
	31.6828	3.2501
	31.7178	3.2533
	31.7528	3.2552
	31.7878	3.2523
	31.8228	3.2505
	31.8578	3.257
	31.8928	3.26
	31.9278	3.2621
	31.9648	3.2632
	31.9998	3.2622
	32.0348	3.2691
	32.0698	3.2533
	32.1048	3.2667
	32.1388	3.2676
	32.1738	3.2649
	32.2088	3.2632
	32.2438	3.2605
	32.2799	3.2598
	32.3159	3.2604
	32.3499	3.2552
	32.3849	3.255
	32.4199	3.2474
	32.4539	3.2585
	32.4889	3.2594
	32.5239	3.2648
	32.5589	3.2606
	32.5949	3.2592
	32.6299	3.2609
	32.6649	3.2544
	32.6999	3.2578
	32.7349	3.2521
	32.7689	3.2557
	32.8029	3.2555
	32.8379	3.2611
	32.8729	3.2635
	32.9079	3.2624
	32.9429	3.2636
	32.9779	3.2584
	33.0129	3.2623
	33.0479	3.2578
	33.0829	3.2539
	33.1179	3.2647
	33.1529	3.2625
	33.1879	3.2586
	33.2229	3.262
	33.2579	3.2564
	33.2939	3.2657
	33.3299	3.2603
	33.3649	3.2648
	33.3989	3.2599
	33.4339	3.2595
	33.4689	3.25
	33.5039	3.2571
	33.5389	3.2567
	33.5739	3.2568
	33.6099	3.2588
	33.6449	3.2592
	33.6799	3.2548
	33.7149	3.2484
	33.7499	3.2517
	33.7849	3.2568
	33.8199	3.2655
	33.8549	3.2493
	33.8899	3.2589
	33.9239	3.252
	33.9599	3.251
	33.9949	3.2598
	34.03	3.2612
	34.064	3.2506
	34.099	3.255
	34.134	3.2623
	34.169	3.2517
	34.204	3.2525
	34.238	3.2509
	34.273	3.2532
	34.309	3.2549
	34.344	3.2465
	34.379	3.258
	34.414	3.2579
	34.449	3.2552
	34.485	3.2578
	34.519	3.2548
	34.554	3.2493
	34.588	3.2558
	34.624	3.2515
	34.659	3.248
	34.695	3.2536
	34.729	3.2483
	34.764	3.2514
	34.799	3.2437
	34.833	3.2516
	34.868	3.2529
	34.903	3.2542
	34.938	3.2574
	34.974	3.2519
	35.01	3.248
	35.044	3.2473
	35.078	3.2501
	35.113	3.2439
	35.148	3.2398
	35.183	3.2404
	35.218	3.2356
	35.253	3.2381
	35.289	3.2358
	35.324	3.2331
	35.359	3.2319
	35.394	3.2401
	35.429	3.2313
	35.464	3.2408
	35.499	3.2277
	35.533	3.2271
	35.568	3.2263
	35.602	3.2268
	35.639	3.2273
	35.674	3.2305
	35.709	3.2236
	35.744	3.2326
	35.7791	3.2277
	35.8141	3.2352
	35.8491	3.2354
	35.8831	3.2375
	35.9181	3.2254
	35.9551	3.2293
	35.9891	3.2278
	36.0241	3.2281
	36.0591	3.2325
	36.0941	3.2281
	36.1281	3.2333
	36.1631	3.228
	36.1971	3.2233
	36.2321	3.2323
	36.2661	3.2279
	36.3011	3.2328
	36.3371	3.2326
	36.3711	3.2355
	36.4071	3.2412
	36.4421	3.2409
	36.4771	3.2339
	36.5121	3.2249
	36.5471	3.2294
	36.5821	3.2329
	36.6171	3.2231
	36.6521	3.2259
	36.6871	3.2319
	36.7231	3.2287
	36.7571	3.2306
	36.7921	3.2351
	36.8261	3.2264
	36.8611	3.2292
	36.8951	3.2212
	36.9301	3.2315
	36.9651	3.2292
	37.0021	3.2219
	37.0381	3.2199
	37.0721	3.2215
	37.1071	3.2226
	37.1421	3.2329
	37.1771	3.2189
	37.2121	3.2065
	37.2471	3.2165
	37.2821	3.2144
	37.3181	3.2069
	37.3531	3.2177
	37.3881	3.2205
	37.4221	3.218
	37.4571	3.2161
	37.4921	3.2207
	37.5272	3.217
	37.5622	3.2228
	37.5972	3.2254
	37.6342	3.2255
	37.6702	3.2189
	37.7042	3.2148
	37.7392	3.2176
	37.7732	3.2235
	37.8082	3.2255
	37.8422	3.2246
	37.8772	3.2302
	37.9112	3.2306
	37.9462	3.2252
	37.9822	3.2259
	38.0172	3.2234
	38.0532	3.2228
	38.0872	3.2236
	38.1222	3.2242
	38.1562	3.2218
	38.1912	3.2317
	38.2262	3.2331
	38.2612	3.2316
	38.2972	3.2291
	38.3322	3.2157
	38.3662	3.2258
	38.4022	3.2202
	38.4362	3.232
	38.4712	3.2309
	38.5062	3.223
	38.5412	3.2172
	38.5762	3.2262
	38.6112	3.2218
	38.6472	3.2331
	38.6822	3.2227
	38.7172	3.2233
	38.7522	3.225
	38.7882	3.2239
	38.8232	3.228
	38.8582	3.2212
	38.8932	3.2258
	38.9292	3.2238
	38.9642	3.2214
	38.9992	3.2209
	39.0342	3.224
	39.0682	3.2175
	39.1032	3.2324
	39.1382	3.2205
	39.1732	3.2221
	39.2082	3.2252
	39.2432	3.2321
	39.2783	3.2301
	39.3143	3.2342
	39.3493	3.2361
	39.3833	3.2332
	39.4183	3.2367
	39.4533	3.2397
	39.4883	3.2317
	39.5233	3.2236
	39.5573	3.2286
	39.5923	3.2334
	39.6293	3.2326
	39.6633	3.2247
	39.6983	3.226
	39.7333	3.2283
	39.7683	3.2235
	39.8033	3.2253
	39.8383	3.2317
	39.8733	3.2296
	39.9083	3.2328
	39.9443	3.2292
	39.9803	3.2325
	40.0143	3.2336
	40.0493	3.2384
	40.0843	3.2304
	40.1193	3.2258
	40.1543	3.2212
	40.1883	3.2178
	40.2233	3.2283
	40.2583	3.2284
	40.2943	3.2244
	40.3283	3.2233
	40.3633	3.2344
	40.3983	3.2254
	40.4333	3.2256
	40.4693	3.2184
	40.5033	3.2206
	40.5393	3.2305
	40.5733	3.2213
	40.6093	3.2164
	40.6453	3.2224
	40.6803	3.2264
	40.7153	3.2225
	40.7503	3.2297
	40.7853	3.2267
	40.8203	3.233
	40.8543	3.227
	40.8893	3.2291
	40.9253	3.2314
	40.9613	3.2265
	40.9964	3.2275
	41.0314	3.2207
	41.0664	3.232
	41.1014	3.2231
	41.1364	3.2155
	41.1704	3.2207
	41.2054	3.2217
	41.2414	3.2247
	41.2754	3.2233
	41.3114	3.231
	41.3454	3.2235
	41.3804	3.2324
	41.4154	3.225
	41.4504	3.2213
	41.4854	3.2297
	41.5204	3.2265
	41.5554	3.2264
	41.5914	3.2297
	41.6264	3.2285
	41.6604	3.2261
	41.6954	3.2255
	41.7304	3.2312
	41.7654	3.2298
	41.8004	3.2283
	41.8354	3.2328
	41.8704	3.2382
	41.9064	3.2346
	41.9424	3.2306
	41.9774	3.2267
	42.0124	3.2237
	42.0474	3.2322
	42.0824	3.2271
	42.1174	3.2257
	42.1524	3.2218
	42.1874	3.2196
	42.2234	3.2237
	42.2584	3.2194
	42.2934	3.2181
	42.3284	3.2108
	42.3634	3.2183
	42.3984	3.2175
	42.4334	3.2283
	42.4684	3.2284
	42.5054	3.2299
	42.5414	3.2304
	42.5774	3.222
	42.6114	3.2172
	42.6464	3.2135
	42.6814	3.2289
	42.7164	3.2223
	42.7515	3.2248
	42.7875	3.2161
	42.8225	3.2266
	42.8575	3.216
	42.8925	3.2181
	42.9275	3.2164
	42.9625	3.2116
	42.9975	3.2163
	43.0325	3.2165
	43.0675	3.2199
	43.1035	3.2211
	43.1375	3.2217
	43.1735	3.2243
	43.2085	3.2148
	43.2435	3.2136
	43.2785	3.2151
	43.3145	3.2199
	43.3485	3.2127
	43.3835	3.217
	43.4185	3.2085
	43.4545	3.2059
	43.4885	3.2107
	43.5235	3.208
	43.5585	3.2205
	43.5935	3.217
	43.6285	3.2008
	43.6635	3.2132
	43.6985	3.2161
	43.7345	3.2262
	43.7705	3.22
	43.8045	3.2218
	43.8395	3.2193
	43.8745	3.2184
	43.9095	3.2181
	43.9445	3.2158
	43.9795	3.2085
	44.0145	3.226
	44.0505	3.2241
	44.0865	3.2267
	44.1215	3.2198
	44.1565	3.2158
	44.1915	3.2221
	44.2265	3.2181
	44.2615	3.2235
	44.2965	3.2252
	44.3315	3.2203
	44.3675	3.2268
	44.4035	3.2199
	44.4375	3.2185
	44.4725	3.2184
	44.5076	3.2148
	44.5426	3.2144
	44.5776	3.2116
	44.6126	3.2159
	44.6486	3.2167
	44.6856	3.2215
	44.7206	3.2246
	44.7566	3.212
	44.7916	3.2095
	44.8256	3.2126
	44.8606	3.2114
	44.8956	3.209
	44.9306	3.2191
	44.9666	3.2117
	45.0006	3.2151
	45.0366	3.2147
	45.0706	3.2126
	45.1056	3.2118
	45.1406	3.2176
	45.1756	3.2118
	45.2106	3.2135
	45.2456	3.1993
	45.2826	3.2006
	45.3166	3.2076
	45.3526	3.2146
	45.3876	3.2017
	45.4216	3.2025
	45.4566	3.2023
	45.4916	3.1981
	45.5266	3.1924
	45.5616	3.1997
	45.5976	3.1885
	45.6316	3.1877
	45.6676	3.1897
	45.7026	3.1845
	45.7376	3.1888
	45.7726	3.1886
	45.8076	3.1862
	45.8426	3.1907
	45.8766	3.1817
	45.9126	3.1857
	45.9486	3.1916
	45.9836	3.1873
	46.0176	3.1962
	46.0526	3.1905
	46.0876	3.1868
	46.1226	3.1896
	46.1576	3.188
	46.1926	3.181
	46.2286	3.197
	46.2637	3.1818
	46.2987	3.1923
	46.3337	3.19
	46.3687	3.1885
	46.4037	3.1992
	46.4387	3.1964
	46.4727	3.1901
	46.5067	3.1787
	46.5417	3.1874
	46.5777	3.1799
	46.6117	3.1823
	46.6467	3.1802
	46.6817	3.1785
	46.7167	3.1811
	46.7517	3.1769
	46.7867	3.1873
	46.8217	3.1799
	46.8557	3.1848
	46.8907	3.1749
	46.9257	3.1732
	46.9597	3.17
	46.9947	3.1799
	47.0297	3.1727
	47.0647	3.1739
	47.0997	3.1824
	47.1347	3.1774
	47.1697	3.1634
	47.2047	3.1658
	47.2387	3.1749
	47.2737	3.1654
	47.3087	3.1728
	47.3437	3.176
	47.3797	3.1798
	47.4147	3.1605
	47.4487	3.177
	47.4837	3.1768
	47.5187	3.1881
	47.5527	3.1764
	47.5877	3.1673
	47.6227	3.1725
	47.6567	3.1635
	47.6927	3.1648
	47.7287	3.1625
	47.7627	3.17
	47.7967	3.1745
	47.8317	3.1624
	47.8667	3.1691
	47.9017	3.1644
	47.9367	3.1841
	47.9717	3.166
	48.0058	3.177
	48.0418	3.1693
	48.0778	3.1798
	48.1118	3.1849
	48.1468	3.1937
	48.1818	3.1919
	48.2168	3.1938
	48.2518	3.1933
	48.2868	3.193
	48.3218	3.1937
	48.3578	3.1997
	48.3918	3.1967
	48.4268	3.1993
	48.4618	3.2016
	48.4968	3.1993
	48.5318	3.2108
	48.5668	3.2026
	48.6018	3.2073
	48.6368	3.2148
	48.6728	3.2084
	48.7088	3.2089
	48.7438	3.2082
	48.7778	3.213
	48.8128	3.2123
	48.8478	3.2122
	48.8828	3.2053
	48.9178	3.2157
	48.9528	3.2067
	48.9888	3.2122
	49.0248	3.2065
	49.0598	3.2068
	49.0948	3.2066
	49.1298	3.2107
	49.1648	3.2098
	49.1998	3.2071
	49.2348	3.2061
	49.2708	3.213
	49.3058	3.2158
	49.3418	3.2132
	49.3768	3.209
	49.4118	3.2191
	49.4458	3.2068
	49.4808	3.2143
	49.5158	3.2114
	49.5508	3.2104
	49.5868	3.2138
	49.6218	3.2104
	49.6578	3.2089
	49.6918	3.2168
	49.7268	3.2243
	49.7619	3.223
	49.7969	3.2237
	49.8319	3.216
	49.8669	3.2126
	49.9019	3.2176
	49.9379	3.2238
	49.9719	3.2152
	50.0069	3.2178
	50.0419	3.2181
	50.0769	3.2167
	50.1119	3.2247
	50.1469	3.2125
	50.1819	3.2094
	50.2169	3.2072
	50.2529	3.2198
	50.2869	3.215
	50.3229	3.2172
	50.3569	3.2128
	50.3919	3.2111
	50.4269	3.2183
	50.4619	3.2084
	50.4959	3.21
	50.5309	3.2114
	50.5659	3.2082
	50.6029	3.2053
	50.6379	3.2138
	50.6729	3.2097
	50.7079	3.2162
	50.7429	3.2026
	50.7779	3.2185
	50.8129	3.2088
	50.8479	3.2092
	50.8839	3.2131
	50.9189	3.2098
	50.9539	3.2033
	50.9889	3.2134
	51.0239	3.2096
	51.0589	3.2056
	51.0939	3.196
	51.1289	3.2115
	51.1639	3.2038
	51.1979	3.2098
	51.2329	3.2095
	51.2679	3.2037
	51.3019	3.198
	51.3369	3.2014
	51.3719	3.1929
	51.4069	3.1945
	51.4419	3.1977
	51.4769	3.198
	51.512	3.1939
	51.547	3.1983
	51.583	3.1968
	51.618	3.1956
	51.653	3.1901
	51.688	3.1896
	51.723	3.1926
	51.758	3.1987
	51.792	3.1904
	51.827	3.1949
	51.862	3.2031
	51.897	3.1844
	51.933	3.1914
	51.967	3.1882
	52.003	3.1903
	52.037	3.1909
	52.072	3.1937
	52.107	3.1954
	52.142	3.1958
	52.177	3.1996
	52.212	3.2016
	52.248	3.1966
	52.283	3.204
	52.318	3.2042
	52.352	3.2103
	52.387	3.2072
	52.422	3.2036
	52.457	3.1999
	52.492	3.2087
	52.527	3.1966
	52.563	3.2087
	52.598	3.2024
	52.634	3.2058
	52.669	3.1983
	52.704	3.2054
	52.739	3.2087
	52.774	3.198
	52.809	3.2007
	52.844	3.1989
	52.88	3.2005
	52.916	3.2063
	52.95	3.2044
	52.985	3.2064
	53.02	3.1981
	53.054	3.1962
	53.089	3.1967
	53.124	3.2012
	53.159	3.2026
	53.194	3.1908
	53.229	3.2092
	53.2641	3.2055
	53.2991	3.1926
	53.3341	3.1997
	53.3691	3.1928
	53.4041	3.2071
	53.4391	3.2029
	53.4741	3.2072
	53.5091	3.2087
	53.5451	3.206
	53.5811	3.2074
	53.6161	3.2008
	53.6511	3.212
	53.6861	3.1994
	53.7211	3.1984
	53.7571	3.1985
	53.7911	3.2054
	53.8261	3.2041
	53.8611	3.1947
	53.8961	3.2004
	53.9311	3.2061
	53.9661	3.2121
	54.0011	3.1978
	54.0361	3.2024
	54.0711	3.2002
	54.1061	3.1952
	54.1401	3.2034
	54.1771	3.1959
	54.2111	3.202
	54.2471	3.1966
	54.2821	3.2058
	54.3171	3.2029
	54.3521	3.2031
	54.3871	3.1951
	54.4221	3.1962
	54.4581	3.1945
	54.4921	3.1908
	54.5281	3.1964
	54.5631	3.2004
	54.5981	3.1885
	54.6331	3.1895
	54.6681	3.1954
	54.7031	3.1966
	54.7381	3.1882
	54.7741	3.2005
	54.8091	3.1979
	54.8451	3.1979
	54.8801	3.1906
	54.9151	3.1977
	54.9501	3.1964
	54.9862	3.1961
	55.0202	3.1967
	55.0552	3.1994
	55.0912	3.1996
	55.1272	3.1925
	55.1622	3.2006
	55.1962	3.1935
	55.2312	3.1875
	55.2662	3.1986
	55.3012	3.2038
	55.3352	3.201
	55.3702	3.1986
	55.4062	3.1988
	55.4412	3.1942
	55.4762	3.1893
	55.5112	3.1971
	55.5462	3.1953
	55.5812	3.207
	55.6152	3.2
	55.6502	3.2003
	55.6842	3.2099
	55.7192	3.2042
	55.7552	3.2043
	55.7912	3.2022
	55.8262	3.2187
	55.8622	3.2104
	55.8972	3.2078
	55.9312	3.2131
	55.9662	3.2084
	56.0002	3.2105
	56.0352	3.2023
	56.0702	3.2061
	56.1062	3.2057
	56.1422	3.2083
	56.1762	3.2091
	56.2112	3.2042
	56.2462	3.2062
	56.2812	3.2033
	56.3162	3.2079
	56.3512	3.2005
	56.3872	3.199
	56.4232	3.2077
	56.4572	3.2074
	56.4922	3.2057
	56.5272	3.2039
	56.5622	3.197
	56.5972	3.1995
	56.6322	3.2078
	56.6672	3.194
	56.7032	3.1986
	56.7383	3.2107
	56.7743	3.2111
	56.8083	3.2064
	56.8433	3.2031
	56.8793	3.2099
	56.9133	3.2026
	56.9483	3.1988
	56.9833	3.2058
	57.0193	3.2023
	57.0553	3.2078
	57.0903	3.1997
	57.1253	3.1983
	57.1603	3.2084
	57.1953	3.2073
	57.2303	3.2127
	57.2653	3.2084
	57.3013	3.2146
	57.3363	3.2172
	57.3703	3.2135
	57.4063	3.2096
	57.4403	3.2141
	57.4753	3.213
	57.5103	3.2153
	57.5453	3.2108
	57.5803	3.2078
	57.6153	3.2155
	57.6513	3.2242
	57.6863	3.2149
	57.7223	3.2074
	57.7583	3.2089
	57.7923	3.2055
	57.8273	3.2135
	57.8623	3.2102
	57.8963	3.21
	57.9313	3.2104
	57.9673	3.2061
	58.0033	3.2105
	58.0383	3.2078
	58.0733	3.2141
	58.1083	3.2124
	58.1433	3.205
	58.1783	3.2227
	58.2123	3.2176
	58.2473	3.2155
	58.2833	3.2158
	58.3193	3.2199
	58.3543	3.2187
	58.3893	3.2195
	58.4243	3.2159
	58.4593	3.2263
	58.4944	3.2247
	58.5294	3.2217
	58.5634	3.2202
	58.5994	3.2251
	58.6354	3.2191
	58.6694	3.2255
	58.7044	3.2213
	58.7384	3.2287
	58.7734	3.2287
	58.8084	3.2305
	58.8434	3.2294
	58.8784	3.227
	58.9144	3.2301
	58.9494	3.2264
	58.9844	3.2223
	59.0194	3.2242
	59.0544	3.2293
	59.0884	3.2283
	59.1234	3.2226
	59.1574	3.2234
	59.1924	3.2217
	59.2264	3.2289
	59.2614	3.2193
	59.2974	3.2193
	59.3324	3.2195
	59.3674	3.2221
	59.4024	3.2276
	59.4374	3.2194
	59.4724	3.2252
	59.5074	3.2215
	59.5424	3.2184
	59.5774	3.2223
	59.6134	3.217
	59.6494	3.2185
	59.6844	3.2118
	59.7194	3.2129
	59.7544	3.2176
	59.7894	3.2146
	59.8244	3.2127
	59.8594	3.2137
	59.8964	3.2074
	59.9304	3.2062
	59.9654	3.2129
	60.0004	3.2139
	60.0344	3.2126
	60.0684	3.2122
	60.1034	3.2164
	60.1384	3.2142
	60.1734	3.2153
	60.2084	3.204
	60.2425	3.2062
	60.2785	3.2028
	60.3145	3.2063
	60.3495	3.2085
	60.3835	3.2216
	60.4185	3.2096
	60.4535	3.2128
	60.4885	3.2051
	60.5235	3.1978
	60.5585	3.2013
	60.5945	3.1979
	60.6305	3.2019
	60.6645	3.2047
	60.6995	3.2056
	60.7345	3.1991
	60.7695	3.2033
	60.8045	3.2012
	60.8395	3.2084
	60.8745	3.2167
	60.9105	3.2006
	60.9465	3.2073
	60.9815	3.2044
	61.0165	3.2086
	61.0515	3.2077
	61.0865	3.2135
	61.1215	3.2079
	61.1565	3.2136
	61.1935	3.2109
	61.2275	3.225
	61.2635	3.2149
	61.2975	3.218
	61.3325	3.222
	61.3675	3.2118
	61.4025	3.2099
	61.4375	3.2116
	61.4725	3.2127
	61.5065	3.211
	61.5425	3.2112
	61.5785	3.2119
	61.6125	3.2116
	61.6475	3.2005
	61.6825	3.2151
	61.7175	3.2075
	61.7525	3.2083
	61.7875	3.2104
	61.8215	3.2159
	61.8555	3.2071
	61.8905	3.2023
	61.9255	3.2074
	61.9615	3.2065
	61.9956	3.2134
	62.0306	3.198
	62.0656	3.2119
	62.1006	3.2042
	62.1356	3.2096
	62.1706	3.1989
	62.2056	3.1914
	62.2416	3.2054
	62.2766	3.1909
	62.3106	3.1937
	62.3456	3.2013
	62.3816	3.1974
	62.4156	3.1936
	62.4506	3.1976
	62.4856	3.1919
	62.5196	3.2022
	62.5556	3.1935
	62.5916	3.1949
	62.6266	3.1921
	62.6616	3.1893
	62.6956	3.1912
	62.7306	3.1747
	62.7656	3.1849
	62.8006	3.1931
	62.8356	3.1876
	62.8696	3.1956
	62.9066	3.1905
	62.9416	3.1883
	62.9766	3.1877
	63.0116	3.1886
	63.0466	3.189
	63.0816	3.1911
	63.1166	3.1901
	63.1516	3.185
	63.1876	3.1889
	63.2226	3.1919
	63.2586	3.1885
	63.2926	3.1952
	63.3276	3.1855
	63.3616	3.1876
	63.3966	3.1948
	63.4316	3.1959
	63.4666	3.1916
	63.5016	3.1942
	63.5376	3.2025
	63.5716	3.1995
	63.6076	3.1942
	63.6426	3.1846
	63.6776	3.1874
	63.7126	3.181
	63.7477	3.1921
	63.7827	3.1936
	63.8177	3.1889
	63.8537	3.2007
	63.8897	3.1932
	63.9247	3.2002
	63.9597	3.2049
	63.9947	3.1975
	64.0297	3.1948
	64.0637	3.2023
	64.0987	3.2028
	64.1337	3.1974
	64.1697	3.1909
	64.2047	3.2006
	64.2397	3.1967
	64.2747	3.1983
	64.3097	3.2001
	64.3447	3.1934
	64.3797	3.1939
	64.4157	3.1965
	64.4497	3.2
	64.4857	3.1939
	64.5217	3.1946
	64.5557	3.1881
	64.5907	3.1892
	64.6257	3.1929
	64.6607	3.1905
	64.6957	3.1809
	64.7307	3.1799
	64.7647	3.1797
	64.8017	3.1822
	64.8377	3.1762
	64.8717	3.1753
	64.9057	3.1822
	64.9407	3.1748
	64.9747	3.1753
	65.0097	3.173
	65.0447	3.1614
	65.0797	3.1771
	65.1147	3.1727
	65.1497	3.1754
	65.1857	3.1702
	65.2207	3.1665
	65.2557	3.1786
	65.2907	3.1675
	65.3257	3.1715
	65.3607	3.1745
	65.3957	3.1744
	65.4317	3.1778
	65.4667	3.1734
	65.5018	3.1769
	65.5368	3.1764
	65.5718	3.1764
	65.6068	3.1855
	65.6418	3.1814
	65.6778	3.1743
	65.7118	3.167
	65.7468	3.1697
	65.7818	3.1725
	65.8178	3.173
	65.8528	3.1758
	65.8878	3.1753
	65.9228	3.1705
	65.9588	3.1679
	65.9928	3.1742
	66.0278	3.1751
	66.0628	3.1801
	66.0988	3.1828
	66.1338	3.1671
	66.1688	3.1854
	66.2038	3.1792
	66.2398	3.1797
	66.2738	3.1771
	66.3088	3.1884
	66.3438	3.1872
	66.3788	3.1886
	66.4138	3.1851
	66.4498	3.171
	66.4848	3.1632
	66.5198	3.1729
	66.5538	3.175
	66.5888	3.1675
	66.6228	3.177
	66.6578	3.1771
	66.6928	3.1736
	66.7288	3.185
	66.7638	3.186
	66.7988	3.1817
	66.8328	3.178
	66.8678	3.1787
	66.9028	3.1762
	66.9368	3.1833
	66.9718	3.1727
	67.0068	3.1821
	67.0418	3.1805
	67.0778	3.1731
	67.1128	3.1787
	67.1478	3.1888
	67.1828	3.1813
	67.2178	3.1824
	67.2529	3.1795
	67.2879	3.1784
	67.3229	3.1821
	67.3579	3.1783
	67.3929	3.1797
	67.4289	3.1872
	67.4639	3.1748
	67.4989	3.1809
	67.5339	3.1822
	67.5689	3.1894
	67.6029	3.1781
	67.6389	3.1896
	67.6729	3.1776
	67.7079	3.1782
	67.7449	3.1784
	67.7799	3.1798
	67.8149	3.1742
	67.8499	3.1763
	67.8849	3.1758
	67.9199	3.1831
	67.9549	3.1821
	67.9899	3.1768
	68.0259	3.1726
	68.0609	3.166
	68.0969	3.1741
	68.1309	3.1675
	68.1659	3.1699
	68.2009	3.173
	68.2359	3.1784
	68.2709	3.1764
	68.3049	3.1827
	68.3399	3.1762
	68.3749	3.1758
	68.4099	3.1735
	68.4449	3.1776
	68.4799	3.1806
	68.5149	3.1789
	68.5499	3.1856
	68.5849	3.1684
	68.6199	3.1811
	68.6549	3.187
	68.6899	3.1804
	68.7249	3.186
	68.7609	3.1885
	68.7959	3.1782
	68.8309	3.1832
	68.8659	3.1851
	68.9009	3.1883
	68.9359	3.1881
	68.9709	3.1829
	69.008	3.1862
	69.042	3.1859
	69.078	3.1921
	69.113	3.1831
	69.148	3.1797
	69.183	3.1816
	69.218	3.1815
	69.253	3.1839
	69.288	3.1843
	69.324	3.1771
	69.359	3.1803
	69.394	3.1737
	69.429	3.1838
	69.464	3.1764
	69.499	3.1787
	69.534	3.1718
	69.569	3.1811
	69.605	3.1734
	69.64	3.1774
	69.676	3.1708
	69.71	3.1685
	69.744	3.1675
	69.779	3.175
	69.814	3.1781
	69.849	3.1754
	69.884	3.1737
	69.919	3.175
	69.956	3.1791
	69.99	3.1756
	70.025	3.1759
	70.06	3.1853
[truncated: 8,592 more rows]
