# Supplementary material for: A new insight into RecA filament regulation by RecX from the analysis of conformation-specific interactions
Source: eLife. 2022 Jun 22;11:e78409. doi: 10.7554/eLife.78409 (PMC9252578; doi:10.7554/eLife.78409)
Supplement: Figure 3—figure supplement 3—source data 1. [file elife-78409-fig3-figsupp3-data1.xlsx]

## Sheet: 1
Time, s	Length, um
0	5.3007
0.035	5.303
0.069	5.2929
0.103	5.3061
0.137	5.3081
0.171	5.3053
0.204	5.306
0.238	5.309
0.273	5.303
0.306	5.309
0.34	5.3023
0.374	5.2981
0.409	5.3014
0.442	5.3029
0.476	5.3074
0.51	5.2962
0.543	5.2996
0.577	5.2868
0.611	5.295
0.646	5.2949
0.679	5.2969
0.714	5.2921
0.748	5.3013
0.783	5.3029
0.816	5.2913
0.85	5.2985
0.8831	5.2912
0.9181	5.2914
0.9511	5.2934
0.9851	5.2915
1.0191	5.291
1.0531	5.3026
1.0871	5.2934
1.1201	5.2867
1.1541	5.2853
1.1881	5.2861
1.2231	5.2868
1.2571	5.2855
1.2921	5.286
1.3251	5.2825
1.3591	5.2758
1.3941	5.2852
1.4291	5.2805
1.4641	5.2849
1.4981	5.2813
1.5321	5.2902
1.5661	5.2771
1.6001	5.2719
1.6351	5.2619
1.6701	5.274
1.7041	5.279
1.7381	5.2745
1.7711	5.2633
1.8051	5.2777
1.8391	5.2816
1.8731	5.2706
1.9071	5.2841
1.9411	5.2754
1.9741	5.2738
2.0081	5.2722
2.0431	5.2891
2.0771	5.2808
2.1111	5.2894
2.1461	5.2874
2.1801	5.2951
2.2141	5.2927
2.2481	5.2944
2.2821	5.2927
2.3161	5.2947
2.3501	5.2982
2.3841	5.2962
2.4191	5.2906
2.4521	5.2958
2.4861	5.2972
2.5201	5.294
2.5541	5.2958
2.5881	5.299
2.6222	5.2881
2.6562	5.2918
2.6912	5.2815
2.7252	5.2866
2.7602	5.281
2.7942	5.2862
2.8282	5.2762
2.8632	5.2732
2.8982	5.2725
2.9322	5.2746
2.9662	5.273
3.0002	5.268
3.0332	5.2787
3.0682	5.282
3.1022	5.2779
3.1362	5.2889
3.1692	5.2924
3.2032	5.2997
3.2382	5.2893
3.2722	5.2795
3.3072	5.2847
3.3412	5.2859
3.3752	5.2918
3.4092	5.2949
3.4432	5.2906
3.4782	5.2793
3.5112	5.2822
3.5462	5.2777
3.5792	5.2749
3.6132	5.2856
3.6472	5.2822
3.6812	5.2919
3.7162	5.2783
3.7502	5.2905
3.7832	5.2938
3.8172	5.2789
3.8512	5.2882
3.8862	5.2746
3.9192	5.2827
3.9532	5.2848
3.9882	5.2679
4.0232	5.2727
4.0562	5.2706
4.0902	5.2609
4.1232	5.2714
4.1572	5.2626
4.1912	5.2701
4.2252	5.2705
4.2602	5.2675
4.2942	5.2712
4.3292	5.2637
4.3632	5.2696
4.3973	5.2727
4.4313	5.2811
4.4663	5.2907
4.4993	5.2847
4.5333	5.2917
4.5673	5.2884
4.6023	5.2849
4.6373	5.2774
4.6713	5.2711
4.7063	5.2833
4.7403	5.2732
4.7743	5.2675
4.8083	5.2753
4.8433	5.2848
4.8763	5.2759
4.9113	5.2861
4.9443	5.2777
4.9793	5.2763
5.0143	5.2688
5.0483	5.2721
5.0823	5.2761
5.1173	5.28
5.1503	5.287
5.1853	5.2761
5.2193	5.2709
5.2533	5.2846
5.2873	5.2814
5.3213	5.2852
5.3563	5.2793
5.3903	5.2824
5.4243	5.2849
5.4583	5.2866
5.4913	5.2884
5.5253	5.2833
5.5593	5.2865
5.5933	5.2909
5.6273	5.2887
5.6623	5.2984
5.6953	5.2868
5.7293	5.2847
5.7643	5.2814
5.7983	5.2793
5.8333	5.276
5.8663	5.2697
5.9003	5.2897
5.9353	5.2895
5.9703	5.2942
6.0043	5.2822
6.0383	5.275
6.0723	5.2689
6.1063	5.2717
6.1404	5.2656
6.1734	5.2677
6.2074	5.2749
6.2414	5.271
6.2754	5.267
6.3094	5.269
6.3424	5.2707
6.3764	5.2532
6.4104	5.2668
6.4444	5.2553
6.4794	5.2643
6.5124	5.2731
6.5464	5.257
6.5814	5.264
6.6144	5.2567
6.6494	5.2537
6.6834	5.2684
6.7184	5.2588
6.7524	5.2702
6.7864	5.2674
6.8204	5.2546
6.8544	5.2759
6.8884	5.2617
6.9214	5.2664
6.9554	5.2686
6.9894	5.2732
7.0234	5.272
7.0584	5.2745
7.0914	5.2746
7.1264	5.288
7.1614	5.2829
7.1944	5.2708
7.2284	5.2793
7.2634	5.2712
7.2984	5.2735
7.3334	5.2825
7.3674	5.2834
7.4024	5.2806
7.4354	5.2794
7.4694	5.2863
7.5034	5.2896
7.5374	5.2907
7.5714	5.2779
7.6064	5.2875
7.6404	5.2894
7.6744	5.2828
7.7084	5.2805
7.7424	5.2814
7.7764	5.2835
7.8104	5.283
7.8454	5.2784
7.8785	5.277
7.9135	5.2819
7.9485	5.28
7.9825	5.2848
8.0165	5.2921
8.0505	5.2754
8.0845	5.2709
8.1195	5.2701
8.1535	5.2665
8.1865	5.2725
8.2205	5.2745
8.2545	5.273
8.2885	5.2664
8.3235	5.2695
8.3575	5.2767
8.3925	5.2698
8.4275	5.2645
8.4615	5.2666
8.4955	5.283
8.5295	5.2679
8.5625	5.2808
8.5975	5.2829
8.6315	5.2812
8.6645	5.2883
8.6985	5.2781
8.7325	5.2731
8.7665	5.2729
8.8005	5.2772
8.8345	5.2755
8.8675	5.2758
8.9015	5.2705
8.9355	5.2694
8.9695	5.2601
9.0045	5.2707
9.0385	5.2705
9.0725	5.2713
9.1065	5.2584
9.1405	5.2575
9.1755	5.2667
9.2095	5.2628
9.2435	5.2618
9.2785	5.2667
9.3125	5.2657
9.3465	5.2675
9.3815	5.2659
9.4145	5.2754
9.4495	5.2806
9.4825	5.2761
9.5165	5.271
9.5505	5.2775
9.5835	5.267
9.6176	5.2755
9.6516	5.2752
9.6856	5.2815
9.7196	5.2794
9.7536	5.2812
9.7876	5.2772
9.8216	5.293
9.8556	5.2907
9.8906	5.2908
9.9246	5.2849
9.9586	5.2842
9.9926	5.2837
10.0266	5.2819
10.0616	5.29
10.0946	5.29
10.1286	5.2822
10.1626	5.2845
10.1966	5.283
10.2306	5.2892
10.2646	5.2839
10.2986	5.2925
10.3336	5.2904
10.3666	5.288
10.4006	5.2862
10.4356	5.2833
10.4696	5.2873
10.5026	5.2948
10.5366	5.2957
10.5696	5.2949
10.6046	5.3025
10.6386	5.3058
10.6736	5.3046
10.7086	5.289
10.7426	5.296
10.7776	5.295
10.8116	5.2916
10.8446	5.2876
10.8786	5.2914
10.9126	5.2944
10.9466	5.2899
10.9806	5.2868
11.0146	5.2813
11.0486	5.2905
11.0826	5.2817
11.1176	5.2798
11.1516	5.2828
11.1866	5.292
11.2206	5.2842
11.2546	5.2778
11.2886	5.2759
11.3236	5.2688
11.3576	5.2762
11.3917	5.2727
11.4257	5.2783
11.4597	5.2795
11.4937	5.2816
11.5277	5.2712
11.5617	5.2812
11.5957	5.2769
11.6297	5.28
11.6637	5.2703
11.6977	5.2778
11.7317	5.2735
11.7657	5.2776
11.7987	5.2809
11.8327	5.2845
11.8667	5.278
11.9007	5.2822
11.9357	5.279
11.9697	5.2818
12.0037	5.2828
12.0387	5.279
12.0727	5.284
12.1067	5.2808
12.1407	5.2869
12.1747	5.2885
12.2087	5.2828
12.2427	5.2874
12.2767	5.2803
12.3107	5.2818
12.3447	5.2863
12.3787	5.2901
12.4137	5.2849
12.4467	5.2802
12.4807	5.2687
12.5147	5.2769
12.5487	5.2801
12.5837	5.2732
12.6167	5.2636
12.6517	5.2706
12.6857	5.2726
12.7207	5.2694
12.7547	5.264
12.7887	5.2629
12.8227	5.272
12.8577	5.2744
12.8907	5.2795
12.9247	5.273
12.9587	5.2801
12.9937	5.2794
13.0277	5.2812
13.0617	5.2884
13.0957	5.285
13.1298	5.2943
13.1638	5.3015
13.1988	5.2938
13.2338	5.3005
13.2678	5.2882
13.3028	5.2976
13.3368	5.2911
13.3708	5.2846
13.4058	5.2933
13.4398	5.2893
13.4748	5.2841
13.5098	5.2882
13.5438	5.2917
13.5778	5.288
13.6118	5.285
13.6458	5.2817
13.6808	5.2786
13.7148	5.2711
13.7498	5.2824
13.7848	5.2824
13.8188	5.2835
13.8528	5.281
13.8868	5.2792
13.9218	5.2872
13.9568	5.2909
13.9898	5.2781
14.0238	5.2856
14.0578	5.2871
14.0918	5.2787
14.1258	5.2795
14.1598	5.2765
14.1938	5.2783
14.2288	5.2708
14.2638	5.2698
14.2978	5.2734
14.3318	5.2792
14.3658	5.2842
14.4008	5.2843
14.4338	5.2901
14.4678	5.2843
14.5018	5.2851
14.5358	5.2715
14.5708	5.2808
14.6038	5.2829
14.6368	5.273
14.6708	5.2758
14.7048	5.2669
14.7388	5.2672
14.7728	5.2682
14.8058	5.2648
14.8398	5.2711
14.8739	5.2643
14.9089	5.2678
14.9419	5.2694
14.9759	5.2698
15.0109	5.2711
15.0439	5.2757
15.0779	5.2711
15.1129	5.2782
15.1469	5.2883
15.1809	5.2851
15.2149	5.2868
15.2489	5.2788
15.2839	5.2845
15.3169	5.2852
15.3509	5.2838
15.3859	5.2792
15.4199	5.2768
15.4539	5.2729
15.4869	5.273
15.5219	5.2701
15.5559	5.2747
15.5899	5.2631
15.6229	5.2852
15.6569	5.2848
15.6919	5.285
15.7259	5.2809
15.7599	5.2727
15.7949	5.2694
15.8279	5.2715
15.8619	5.2709
15.8969	5.2784
15.9299	5.2662
15.9639	5.2654
15.9979	5.248
16.0329	5.2578
16.0659	5.261
16.0999	5.2622
16.1339	5.2627
16.1679	5.269
16.2029	5.2708
16.2359	5.2663
16.2699	5.2835
16.3039	5.2758
16.3379	5.2649
16.3729	5.2696
16.4059	5.2696
16.4409	5.268
16.4759	5.2667
16.5109	5.253
16.5459	5.2579
16.5789	5.2584
16.612	5.2648
16.646	5.2557
16.68	5.2613
16.714	5.2544
16.749	5.253
16.782	5.2544
16.816	5.2546
16.85	5.2568
16.884	5.2517
16.918	5.2613
16.952	5.2575
16.986	5.2617
17.021	5.2612
17.054	5.2586
17.089	5.258
17.124	5.261
17.158	5.2557
17.193	5.256
17.227	5.2553
17.261	5.2588
17.295	5.2534
17.329	5.2587
17.364	5.2603
17.397	5.2605
17.431	5.2526
17.465	5.256
17.499	5.2618
17.532	5.2699
17.567	5.2684
17.602	5.2556
17.636	5.2547
17.669	5.2552
17.704	5.2504
17.739	5.2697
17.773	5.2627
17.808	5.2697
17.842	5.2589
17.876	5.2586
17.91	5.2606
17.944	5.2588
17.978	5.2618
18.013	5.2599
18.046	5.2629
18.08	5.2622
18.114	5.2846
18.149	5.2661
18.182	5.2669
18.216	5.2636
18.249	5.259
18.283	5.2693
18.317	5.2716
18.351	5.264
18.3861	5.2744
18.4211	5.2702
18.4541	5.2652
18.4881	5.2652
18.5231	5.2566
18.5571	5.2656
18.5921	5.269
18.6251	5.2552
18.6591	5.2624
18.6931	5.261
18.7271	5.2605
18.7611	5.2501
18.7951	5.2588
18.8301	5.2551
18.8641	5.2574
18.8971	5.262
18.9321	5.2617
18.9651	5.2697
19.0001	5.2696
19.0331	5.2693
19.0681	5.265
19.1031	5.2585
19.1381	5.2636
19.1721	5.2694
19.2061	5.2715
19.2391	5.2822
19.2731	5.2766
19.3071	5.2687
19.3411	5.2597
19.3751	5.2778
19.4091	5.258
19.4441	5.2711
19.4771	5.2721
19.5111	5.2696
19.5451	5.2677
19.5801	5.2677
19.6141	5.2646
19.6481	5.2707
19.6821	5.2651
19.7161	5.2842
19.7511	5.2791
19.7851	5.279
19.8201	5.2812
19.8541	5.2711
19.8881	5.2696
19.9221	5.2658
19.9551	5.275
19.9891	5.279
20.0231	5.2794
20.0571	5.2806
20.0911	5.2829
20.1252	5.275
20.1582	5.285
20.1922	5.2703
20.2262	5.2679
20.2602	5.2747
20.2942	5.278
20.3282	5.2891
20.3632	5.2774
20.3972	5.2761
20.4312	5.2741
20.4652	5.2837
20.5002	5.2685
20.5342	5.2663
20.5692	5.2704
20.6032	5.2706
20.6372	5.2693
20.6702	5.2679
20.7042	5.2696
20.7382	5.2665
20.7722	5.2648
20.8062	5.2754
20.8402	5.275
20.8742	5.2742
20.9082	5.2714
20.9432	5.2645
20.9762	5.2655
21.0102	5.2681
21.0442	5.2679
21.0782	5.2578
21.1122	5.2669
21.1462	5.2686
21.1802	5.2715
21.2152	5.2666
21.2482	5.2775
21.2832	5.2788
21.3172	5.2778
21.3512	5.2841
21.3842	5.2717
21.4182	5.2691
21.4522	5.268
21.4862	5.2703
21.5202	5.2769
21.5542	5.2685
21.5882	5.2732
21.6222	5.261
21.6562	5.2623
21.6902	5.2847
21.7242	5.2749
21.7592	5.2804
21.7942	5.2751
21.8292	5.2703
21.8633	5.2725
21.8983	5.2841
21.9323	5.2797
21.9663	5.2816
22.0003	5.269
22.0343	5.2664
22.0673	5.2707
22.1013	5.2666
22.1363	5.2711
22.1703	5.2774
22.2033	5.2697
22.2373	5.2745
22.2713	5.2699
22.3053	5.2685
22.3393	5.2648
22.3733	5.2645
22.4083	5.2702
22.4413	5.2687
22.4763	5.2713
22.5113	5.2734
22.5463	5.271
22.5813	5.2558
22.6143	5.2807
22.6483	5.2772
22.6823	5.2696
22.7173	5.2816
22.7513	5.2803
22.7863	5.2784
22.8193	5.2859
22.8533	5.2683
22.8873	5.2733
22.9213	5.2784
22.9553	5.2859
22.9883	5.2867
23.0223	5.2888
23.0563	5.2838
23.0913	5.2905
23.1253	5.2719
23.1593	5.2682
23.1933	5.2784
23.2283	5.2695
23.2623	5.2861
23.2963	5.2597
23.3303	5.2696
23.3633	5.2733
23.3973	5.2648
23.4313	5.263
23.4653	5.2648
23.4993	5.2695
23.5333	5.2646
23.5673	5.2639
23.6024	5.2661
23.6364	5.2673
23.6704	5.2665
23.7044	5.2608
23.7374	5.2494
23.7714	5.2528
23.8064	5.2501
23.8414	5.2591
23.8754	5.2552
23.9094	5.2476
23.9444	5.2578
23.9774	5.266
24.0114	5.2691
24.0454	5.2642
24.0784	5.257
24.1124	5.2582
24.1464	5.2697
24.1794	5.2722
24.2134	5.2621
24.2484	5.2668
24.2814	5.2677
24.3164	5.2677
24.3504	5.2684
24.3834	5.2726
24.4174	5.2764
24.4514	5.2694
24.4854	5.2761
24.5204	5.2708
24.5544	5.2745
24.5894	5.2869
24.6234	5.2864
24.6574	5.2651
24.6924	5.2793
24.7274	5.2774
24.7624	5.2776
24.7954	5.2815
24.8294	5.2855
24.8634	5.2807
24.8964	5.2826
24.9304	5.2665
24.9644	5.2719
24.9984	5.2685
25.0334	5.2755
25.0674	5.2757
25.1014	5.2774
25.1364	5.2717
25.1714	5.277
25.2064	5.2746
25.2404	5.2727
25.2754	5.276
25.3084	5.2558
25.3424	5.2685
25.3775	5.2683
25.4105	5.2739
25.4445	5.265
25.4785	5.2734
25.5125	5.2742
25.5465	5.2651
25.5805	5.2544
25.6155	5.2602
25.6495	5.2639
25.6835	5.2544
25.7185	5.2594
25.7535	5.2644
25.7885	5.2672
25.8235	5.2624
25.8585	5.2645
25.8925	5.2666
25.9265	5.2625
25.9595	5.2645
25.9935	5.2659
26.0285	5.2689
26.0625	5.2626
26.0955	5.2709
26.1305	5.2579
26.1645	5.2679
26.1985	5.2657
26.2335	5.2618
26.2675	5.2633
26.3025	5.2718
26.3375	5.2632
26.3715	5.2685
26.4105	5.2794
26.4455	5.2633
26.4795	5.2816
26.5125	5.2667
26.5475	5.2805
26.5815	5.2806
26.6155	5.2743
26.6505	5.2734
26.6845	5.2704
26.7195	5.2731
26.7535	5.2787
26.7875	5.2741
26.8215	5.2868
26.8555	5.2727
26.8895	5.2686
26.9235	5.2675
26.9575	5.2688
26.9915	5.2641
27.0255	5.2662
27.0595	5.2574
27.0936	5.2691
27.1276	5.268
27.1626	5.2656
27.1956	5.2707
27.2306	5.2666
27.2646	5.2782
27.2986	5.2688
27.3326	5.278
27.3666	5.2731
27.4006	5.2677
27.4356	5.2701
27.4686	5.2646
27.5026	5.2647
27.5366	5.2751
27.5706	5.2704
27.6046	5.2828
27.6376	5.2711
27.6716	5.2639
27.7056	5.2675
27.7396	5.2638
27.7736	5.2674
27.8076	5.2611
27.8406	5.2648
27.8746	5.2673
27.9096	5.2765
27.9436	5.2751
27.9766	5.2699
28.0106	5.2766
28.0446	5.2672
28.0796	5.2707
28.1136	5.2699
28.1476	5.2668
28.1816	5.2651
28.2166	5.2825
28.2516	5.2795
28.2856	5.281
28.3186	5.2783
28.3526	5.2861
28.3866	5.2863
28.4216	5.2842
28.4546	5.2945
28.4896	5.2922
28.5236	5.2944
28.5566	5.2837
28.5916	5.2688
28.6246	5.2794
28.6586	5.2949
28.6936	5.2894
28.7276	5.291
28.7636	5.2812
28.7966	5.283
28.8316	5.2871
28.8657	5.2838
28.8997	5.2719
28.9337	5.2734
28.9677	5.2737
29.0017	5.2801
29.0357	5.2841
29.0687	5.2834
29.1027	5.282
29.1357	5.2823
29.1697	5.2797
29.2037	5.2795
29.2377	5.2864
29.2717	5.2861
29.3057	5.2838
29.3397	5.2871
29.3737	5.2895
29.4087	5.2853
29.4427	5.2876
29.4777	5.2843
29.5117	5.284
29.5447	5.2817
29.5797	5.2755
29.6137	5.2934
29.6467	5.2809
29.6807	5.2719
29.7157	5.2755
29.7497	5.2844
29.7847	5.28
29.8187	5.2861
29.8517	5.2828
29.8857	5.2932
29.9197	5.2949
29.9547	5.2878
29.9877	5.275
30.0217	5.2766
30.0557	5.2795
30.0907	5.2868
30.1247	5.2858
30.1587	5.2885
30.1937	5.2907
30.2287	5.281
30.2627	5.2742
30.2967	5.2667
30.3307	5.2775
30.3657	5.2776
30.3987	5.2755
30.4327	5.2925
30.4667	5.2865
30.5007	5.2895
30.5347	5.2961
30.5697	5.2853
30.6028	5.2926
30.6378	5.2835
30.6718	5.2884
30.7048	5.2852
30.7398	5.2766
30.7748	5.2817
30.8078	5.2679
30.8418	5.2729
30.8768	5.2744
30.9108	5.2691
30.9458	5.271
30.9788	5.2578
31.0128	5.263
31.0468	5.2534
31.0808	5.2552
31.1148	5.2571
31.1488	5.261
31.1828	5.257
31.2168	5.2532
31.2508	5.2643
31.2848	5.2626
31.3188	5.2605
31.3538	5.2624
31.3888	5.2605
31.4228	5.2511
31.4568	5.2574
31.4908	5.2595
31.5258	5.2561
31.5598	5.2494
31.5938	5.2594
31.6278	5.2579
31.6608	5.2597
31.6948	5.2555
31.7288	5.2538
31.7628	5.2543
31.7968	5.2664
31.8308	5.2764
31.8638	5.2557
31.8988	5.2672
31.9318	5.262
31.9658	5.2586
31.9998	5.2649
32.0338	5.2666
32.0678	5.2683
32.1028	5.2583
32.1378	5.2616
32.1718	5.2619
32.2068	5.2578
32.2418	5.253
32.2768	5.2564
32.3108	5.2594
32.3449	5.2503
32.3789	5.2477
32.4139	5.255
32.4469	5.2466
32.4809	5.2316
32.5149	5.2438
32.5489	5.2373
32.5819	5.229
32.6159	5.2271
32.6509	5.2304
32.6849	5.2388
32.7199	5.2316
32.7559	5.2372
32.7899	5.2356
32.8239	5.2373
32.8579	5.2426
32.8919	5.2415
32.9259	5.2364
32.9599	5.2314
32.9939	5.2204
33.0279	5.2255
33.0629	5.2297
33.0959	5.2373
33.1309	5.2338
33.1649	5.2244
33.1989	5.232
33.2329	5.2219
33.2669	5.225
33.3009	5.2144
33.3359	5.2192
33.3709	5.2077
33.4049	5.2085
33.4399	5.2054
33.4729	5.2061
33.5069	5.2168
33.5409	5.2137
33.5749	5.2235
33.6089	5.2073
33.6439	5.2149
33.6769	5.2196
33.7109	5.2241
33.7449	5.2336
33.7799	5.2185
33.8129	5.2259
33.8469	5.2256
33.8819	5.2089
33.9159	5.2187
33.9509	5.2195
33.9839	5.2239
34.0189	5.2129
34.0529	5.2055
34.0869	5.198
34.122	5.204
34.155	5.1924
34.189	5.1884
34.223	5.1823
34.257	5.1807
34.291	5.1741
34.326	5.1555
34.36	5.1537
34.395	5.1492
34.428	5.1414
34.462	5.1433
34.497	5.1438
34.532	5.1244
34.567	5.1186
34.601	5.1152
34.635	5.1018
34.67	5.0987
34.705	5.0762
34.739	5.0695
34.773	5.063
34.807	5.0573
34.841	5.052
34.875	5.0406
34.91	5.0173
34.944	5.0064
34.979	4.9801
35.014	4.9605
35.049	4.962
35.083	4.9465
35.117	4.9286
35.151	4.9084
35.185	4.8923
35.219	4.8725
35.253	4.8594
35.287	4.8435
35.322	4.835
35.356	4.8108
35.391	4.7978
35.425	4.7789
35.458	4.763
35.492	4.7516
35.526	4.7391
35.56	4.727
35.595	4.7163
35.63	4.6958
35.664	4.6721
35.698	4.6675
35.732	4.6495
35.767	4.6363
35.8	4.6283
35.8351	4.6169
35.8691	4.6021
35.9031	4.5922
35.9381	4.5775
35.9711	4.5563
36.0061	4.5389
36.0401	4.5294
36.0741	4.5187
36.1091	4.5089
36.1441	4.4956
36.1781	4.487
36.2121	4.4787
36.2471	4.4631
36.2821	4.4472
36.3151	4.4427
36.3501	4.4376
36.3831	4.4299
36.4181	4.4142
36.4511	4.4004
36.4861	4.391
36.5201	4.3842
36.5541	4.3787
36.5891	4.3666
36.6221	4.3623
36.6571	4.3537
36.6911	4.3449
36.7251	4.3388
36.7601	4.3297
36.7951	4.3246
36.8291	4.3205
36.8641	4.3103
36.8981	4.3024
36.9311	4.31
36.9651	4.3031
37.0001	4.3022
37.0331	4.2856
37.0671	4.2931
37.1011	4.2869
37.1361	4.2789
37.1691	4.2712
37.2031	4.2708
37.2381	4.2607
37.2711	4.2676
37.3051	4.2639
37.3391	4.2572
37.3731	4.2542
37.4071	4.2476
37.4411	4.2495
37.4751	4.2418
37.5091	4.2419
37.5441	4.2404
37.5781	4.2289
37.6112	4.2339
37.6452	4.2327
37.6792	4.2307
37.7132	4.2323
37.7472	4.2222
37.7822	4.2206
37.8152	4.2258
37.8502	4.2204
37.8842	4.2172
37.9172	4.2125
37.9512	4.2142
37.9852	4.2109
38.0202	4.213
38.0552	4.2137
38.0902	4.2107
38.1242	4.204
38.1572	4.199
38.1922	4.197
38.2272	4.1995
38.2602	4.2013
38.2942	4.1918
38.3282	4.1977
38.3622	4.1907
38.3962	4.1875
38.4302	4.185
38.4642	4.1811
38.4982	4.1814
38.5312	4.1682
38.5652	4.1714
38.5992	4.1763
38.6332	4.1691
38.6682	4.1615
38.7022	4.1672
38.7352	4.1667
38.7702	4.1646
38.8042	4.1637
38.8392	4.1643
38.8732	4.162
38.9072	4.1666
38.9412	4.1638
38.9762	4.1542
39.0092	4.1573
39.0432	4.1602
39.0772	4.1564
39.1122	4.1463
39.1452	4.1541
39.1792	4.1507
39.2132	4.1494
39.2482	4.1456
39.2812	4.1464
39.3162	4.1522
39.3493	4.1439
39.3833	4.1514
39.4183	4.153
39.4533	4.1467
39.4873	4.1473
39.5213	4.1493
39.5553	4.1453
39.5903	4.1402
39.6243	4.145
39.6573	4.1375
39.6913	4.1322
39.7253	4.1312
39.7593	4.1304
39.7923	4.1347
39.8263	4.1347
39.8603	4.1332
39.8943	4.1347
39.9283	4.1277
39.9633	4.1322
39.9973	4.1244
40.0303	4.124
40.0643	4.1145
40.0983	4.1249
40.1333	4.1285
40.1673	4.1206
40.2023	4.1247
40.2353	4.124
40.2703	4.1261
40.3043	4.1176
40.3383	4.1188
40.3723	4.117
40.4053	4.1183
40.4393	4.1218
40.4723	4.1207
40.5063	4.1244
40.5403	4.1223
40.5743	4.1174
40.6073	4.1125
40.6413	4.1172
40.6753	4.1146
40.7093	4.1168
40.7433	4.1172
40.7773	4.1171
40.8113	4.1183
40.8453	4.1191
40.8793	4.1174
40.9133	4.1132
40.9483	4.1117
40.9833	4.1179
41.0173	4.1158
41.0523	4.1114
41.0864	4.1096
41.1204	4.1095
41.1534	4.1093
41.1874	4.106
41.2224	4.1056
41.2554	4.1068
41.2894	4.1122
41.3234	4.107
41.3574	4.1085
41.3914	4.1124
41.4264	4.1137
41.4594	4.1108
41.4934	4.1096
41.5274	4.1076
41.5614	4.1034
41.5964	4.1071
41.6314	4.1001
41.6654	4.1008
41.6994	4.1036
41.7344	4.1007
41.7674	4.1035
41.8014	4.1048
41.8354	4.1059
41.8694	4.1085
41.9034	4.1051
41.9374	4.1003
41.9714	4.0955
42.0064	4.1088
42.0404	4.1069
42.0744	4.1004
42.1084	4.1052
42.1424	4.1049
42.1764	4.1084
42.2104	4.1026
42.2454	4.1063
42.2804	4.108
42.3134	4.1092
42.3474	4.0993
42.3814	4.1023
42.4164	4.1035
42.4494	4.1087
42.4834	4.1019
42.5174	4.1066
42.5514	4.1024
42.5854	4.1061
42.6194	4.1102
42.6534	4.1056
42.6884	4.1083
42.7214	4.0968
42.7554	4.1056
42.7894	4.102
42.8224	4.1075
42.8565	4.1064
42.8905	4.1081
42.9245	4.1071
42.9595	4.1083
42.9945	4.1112
43.0285	4.1027
43.0625	4.1068
43.0975	4.1041
43.1305	4.1047
43.1645	4.1114
43.1985	4.1097
43.2325	4.1058
43.2655	4.1064
43.2995	4.1105
43.3335	4.1066
43.3675	4.1103
43.4015	4.1111
43.4355	4.113
43.4695	4.1121
43.5035	4.1035
43.5375	4.1052
43.5715	4.1033
43.6055	4.1031
43.6405	4.1023
43.6735	4.105
43.7085	4.1045
43.7415	4.1093
43.7765	4.1057
43.8105	4.1
43.8435	4.0998
43.8785	4.101
43.9125	4.1049
43.9465	4.1029
43.9805	4.098
44.0155	4.0988
44.0495	4.1004
44.0845	4.0915
44.1185	4.0987
44.1525	4.0967
44.1865	4.0983
44.2205	4.0987
44.2545	4.0981
44.2895	4.0989
44.3235	4.0917
44.3585	4.0913
44.3935	4.0982
44.4275	4.0879
44.4615	4.087
44.4955	4.0947
44.5295	4.098
44.5645	4.0969
44.5976	4.0948
44.6316	4.0933
44.6666	4.1048
44.7006	4.0951
44.7346	4.0957
44.7676	4.0934
44.8016	4.0982
44.8356	4.1008
44.8696	4.1069
44.9036	4.1034
44.9386	4.097
44.9746	4.1065
45.0096	4.1032
45.0436	4.0994
45.0766	4.097
45.1106	4.1043
45.1456	4.1063
45.1786	4.1039
45.2126	4.1063
45.2476	4.1044
45.2816	4.1013
45.3156	4.1053
45.3496	4.1046
45.3846	4.1024
45.4186	4.1045
45.4536	4.102
45.4876	4.1004
45.5226	4.1075
45.5566	4.1014
45.5896	4.0953
45.6246	4.1022
45.6586	4.1035
45.6926	4.0966
45.7266	4.1064
45.7606	4.1024
45.7946	4.1013
45.8296	4.1006
45.8646	4.097
45.8976	4.1006
45.9326	4.0952
45.9666	4.0941
46.0006	4.0999
46.0346	4.1016
46.0686	4.0963
46.1026	4.0995
46.1376	4.0918
46.1726	4.1003
46.2066	4.0893
46.2396	4.0921
46.2736	4.0949
46.3076	4.0955
46.3417	4.0944
46.3757	4.092
46.4097	4.0922
46.4437	4.0941
46.4777	4.0948
46.5117	4.0875
46.5457	4.0927
46.5807	4.0932
46.6157	4.093
46.6487	4.0938
46.6837	4.0919
46.7177	4.0914
46.7527	4.091
46.7867	4.083
46.8197	4.0923
46.8547	4.0936
46.8887	4.0912
46.9237	4.0822
46.9577	4.0903
46.9927	4.0913
47.0277	4.0848
47.0627	4.0853
47.0967	4.0822
47.1307	4.0831
47.1647	4.0775
47.1997	4.0839
47.2357	4.0854
47.2697	4.0816
47.3047	4.0856
47.3377	4.0797
47.3717	4.0824
47.4057	4.082
47.4397	4.0655
47.4737	4.0784
47.5077	4.0766
47.5407	4.0754
47.5747	4.0786
47.6087	4.0728
47.6437	4.0724
47.6777	4.0811
47.7117	4.0792
47.7457	4.0825
47.7797	4.0825
47.8137	4.0783
47.8487	4.0757
47.8837	4.0753
47.9167	4.0806
47.9517	4.0799
47.9857	4.0793
48.0197	4.0771
48.0537	4.0812
48.0878	4.0745
48.1218	4.0853
48.1568	4.0824
48.1898	4.084
48.2238	4.0825
48.2578	4.0787
48.2918	4.0817
48.3258	4.0831
48.3598	4.0828
48.3948	4.0814
48.4278	4.0877
48.4618	4.0835
48.4968	4.0861
48.5308	4.0816
48.5648	4.0818
48.5988	4.0835
48.6338	4.085
48.6678	4.0785
48.7008	4.083
48.7348	4.0791
48.7678	4.0794
48.8018	4.083
48.8358	4.0815
48.8708	4.0806
48.9038	4.0817
48.9378	4.075
48.9718	4.0822
49.0068	4.0823
49.0398	4.0801
49.0738	4.0814
49.1088	4.0769
49.1428	4.0859
49.1768	4.0754
49.2118	4.0761
49.2468	4.0775
49.2798	4.0795
49.3138	4.0766
49.3488	4.0746
49.3828	4.0713
49.4168	4.0709
49.4508	4.0747
49.4848	4.0768
49.5188	4.0739
49.5528	4.0739
49.5868	4.0692
49.6198	4.0747
49.6538	4.0752
49.6878	4.0777
49.7218	4.0735
49.7568	4.0713
49.7898	4.0693
49.8249	4.0653
49.8589	4.069
49.8929	4.07
49.9269	4.0777
49.9619	4.0755
49.9969	4.0763
50.0319	4.0746
50.0669	4.0747
50.1009	4.0721
50.1349	4.0752
50.1689	4.0766
50.2029	4.0751
50.2369	4.0716
50.2709	4.0743
50.3049	4.0759
50.3389	4.075
50.3729	4.0703
50.4069	4.0729
50.4419	4.0731
50.4759	4.0741
50.5089	4.0718
50.5439	4.0772
50.5789	4.0716
50.6129	4.0715
50.6469	4.074
50.6819	4.0737
50.7149	4.079
50.7489	4.0789
50.7829	4.0731
50.8169	4.0682
50.8519	4.0673
50.8849	4.0679
50.9189	4.0714
50.9529	4.066
50.9879	4.0713
51.0219	4.07
51.0559	4.0718
51.0909	4.0735
51.1259	4.0724
51.1609	4.0701
51.1949	4.0671
51.2289	4.0697
51.2629	4.067
51.2969	4.0732
51.3319	4.0715
51.3649	4.0702
51.3989	4.0648
51.4329	4.0666
51.4669	4.0725
51.5009	4.0732
51.5359	4.0655
51.57	4.0689
51.604	4.0694
51.638	4.0681
51.673	4.0696
51.708	4.0646
51.741	4.0697
51.776	4.0628
51.81	4.0712
51.844	4.0678
51.879	4.0687
51.912	4.0664
51.946	4.0716
51.98	4.0678
52.014	4.0693
52.048	4.0669
52.083	4.0681
52.116	4.0664
52.15	4.0753
52.184	4.0716
52.218	4.0679
52.252	4.0661
52.287	4.0654
52.321	4.0659
52.356	4.0625
52.389	4.073
52.424	4.0704
52.458	4.0633
52.492	4.0716
52.526	4.0632
52.56	4.0582
52.594	4.0606
52.628	4.058
52.662	4.0622
52.696	4.0645
52.73	4.0608
52.764	4.0588
52.799	4.0597
52.832	4.0593
52.867	4.0631
52.901	4.0538
52.934	4.0533
52.969	4.0538
53.004	4.049
53.039	4.0482
53.073	4.0528
53.107	4.0494
53.141	4.0562
53.176	4.0482
53.209	4.0474
53.243	4.0501
53.277	4.0553
53.312	4.0447
53.3451	4.0507
53.3791	4.0501
53.4131	4.0536
53.4471	4.0569
53.4811	4.0483
53.5161	4.0624
53.5491	4.0563
53.5841	4.0576
53.6181	4.0563
53.6531	4.0601
53.6881	4.0572
53.7221	4.052
53.7561	4.0568
53.7901	4.0561
53.8241	4.0542
53.8581	4.0543
53.8921	4.0571
53.9261	4.0531
53.9601	4.0522
53.9941	4.0515
54.0281	4.0533
54.0621	4.0436
54.0961	4.0523
54.1301	4.049
54.1651	4.0473
54.1991	4.0504
54.2341	4.0455
54.2681	4.0519
54.3031	4.051
54.3371	4.0506
54.3711	4.0538
54.4061	4.0484
54.4401	4.052
54.4741	4.048
54.5071	4.0513
54.5411	4.0466
54.5761	4.0552
54.6101	4.0447
54.6441	4.0479
54.6781	4.0447
54.7131	4.0457
54.7471	4.0459
54.7801	4.0476
54.8151	4.0465
54.8501	4.0458
54.8851	4.0453
54.9191	4.052
54.9531	4.052
54.9871	4.0447
55.0221	4.0447
55.0551	4.0449
55.0892	4.0501
55.1232	4.0453
55.1572	4.0432
55.1922	4.0491
55.2252	4.0511
55.2592	4.0423
55.2932	4.0488
55.3272	4.0465
55.3622	4.0437
55.3972	4.0439
55.4312	4.044
55.4662	4.0439
55.4992	4.0365
55.5332	4.0415
55.5672	4.0356
55.6012	4.033
55.6362	4.0333
55.6692	4.0349
55.7032	4.0367
55.7372	4.0356
55.7722	4.0331
55.8052	4.0343
55.8392	4.0378
55.8732	4.0334
55.9082	4.0348
55.9412	4.0288
55.9762	4.0346
56.0102	4.0314
56.0452	4.0348
56.0802	4.0342
56.1152	4.0317
56.1502	4.0313
56.1842	4.0331
56.2182	4.0362
56.2532	4.0276
56.2882	4.0279
56.3222	4.0261
56.3562	4.0293
56.3902	4.0259
56.4232	4.0261
56.4582	4.0248
56.4922	4.0257
56.5262	4.0245
56.5612	4.0248
56.5952	4.0267
56.6302	4.0312
56.6642	4.0253
56.6982	4.0259
56.7322	4.026
56.7652	4.0235
56.7992	4.0342
56.8333	4.0274
56.8673	4.031
56.9023	4.018
56.9353	4.0255
56.9693	4.0252
57.0043	4.0301
57.0393	4.0266
57.0723	4.0306
57.1063	4.0308
57.1403	4.0296
57.1753	4.0281
57.2093	4.0267
57.2443	4.0274
57.2793	4.0231
57.3133	4.0286
57.3483	4.0269
57.3813	4.0209
57.4163	4.0258
57.4493	4.0276
57.4843	4.0227
57.5183	4.0266
57.5523	4.022
57.5863	4.0247
57.6203	4.0105
57.6553	4.0232
57.6903	4.0252
57.7243	4.0192
57.7593	4.0196
57.7943	4.0198
57.8293	4.013
57.8633	4.0227
57.8983	4.0121
57.9313	4.0135
57.9653	4.0123
57.9993	4.0166
58.0333	4.0084
58.0673	4.0103
58.1023	4.0141
58.1363	4.0064
58.1713	4.0116
58.2043	4.0144
58.2383	4.0126
58.2733	4.0162
58.3073	4.0089
58.3423	4.0177
58.3763	4.0138
58.4103	4.0086
58.4443	4.02
58.4783	4.0192
58.5123	4.0224
58.5463	4.0155
58.5804	4.0209
58.6144	4.0145
58.6484	4.0212
58.6824	4.0178
58.7154	4.0219
58.7494	4.0217
58.7834	4.0264
58.8174	4.0204
58.8514	4.0237
58.8854	4.0198
58.9204	4.0186
58.9544	4.0216
58.9884	4.0243
59.0234	4.0235
59.0564	4.017
59.0914	4.0159
59.1254	4.017
59.1594	4.0175
59.1934	4.0195
59.2274	4.0151
59.2614	4.0203
59.2954	4.0228
59.3284	4.0225
59.3624	4.0176
59.3964	4.0178
59.4304	4.0166
59.4654	4.0174
59.4994	4.0214
59.5324	4.0206
59.5674	4.0233
59.6014	4.0162
59.6364	4.0196
59.6714	4.0228
59.7034	4.0229
59.7384	4.02
59.7714	4.0201
59.8054	4.0216
59.8384	4.0235
59.8734	4.0243
59.9064	4.0198
59.9404	4.0181
59.9744	4.0211
60.0084	4.0157
60.0424	4.0181
60.0774	4.0196
60.1114	4.0172
60.1454	4.0126
60.1794	4.0159
60.2134	4.0186
60.2484	4.0225
60.2834	4.0183
60.3175	4.0181
60.3525	4.0169
60.3865	4.0232
60.4205	4.0183
60.4555	4.0181
60.4895	4.0244
60.5225	4.0167
60.5565	4.0192
60.5915	4.0174
60.6245	4.0145
60.6585	4.0146
60.6925	4.0145
60.7275	4.0235
60.7605	4.0091
60.7945	4.0166
60.8285	4.0075
60.8635	4.0162
60.8975	4.0179
60.9315	4.0118
60.9655	4.0212
61.0005	4.0099
61.0345	4.0219
61.0685	4.0137
61.1045	4.0175
61.1385	4.0199
61.1715	4.011
61.2055	4.0108
61.2395	4.0121
61.2735	4.0126
61.3085	4.0157
61.3415	4.0085
61.3755	4.0139
61.4095	4.0143
61.4435	4.0038
61.4775	4.0057
61.5115	4.0067
61.5465	4.009
61.5795	4.0023
61.6145	4.0094
61.6485	4.0094
61.6835	4.01
61.7175	3.9979
61.7515	4.007
61.7855	3.9983
61.8195	4.0017
61.8535	4.0027
61.8875	4.0099
61.9215	4.0058
61.9565	4.0043
61.9895	4.0018
62.0235	4.001
62.0585	4.0084
62.0926	4.0055
62.1256	4.0019
62.1606	4.0009
62.1946	4.0028
62.2286	4.0063
62.2616	3.9989
62.2966	4.004
62.3316	4.0057
62.3666	4.0069
62.4006	4.0083
62.4346	4.012
62.4676	4.0115
62.5026	4.0098
62.5356	4.0127
62.5696	4.0129
62.6036	4.0079
62.6376	4.0044
62.6716	4.0051
62.7056	4.0127
62.7406	4.0133
62.7746	4.0115
62.8076	4.0088
62.8416	4.0074
62.8756	4.0118
62.9096	4.0113
62.9446	4.011
62.9786	4.0076
63.0136	4.015
63.0486	4.0115
63.0826	4.0088
63.1166	4.0146
63.1516	4.0119
63.1846	4.0108
63.2186	3.999
63.2526	4.0085
63.2876	4.0064
63.3206	4.0053
63.3556	4.0147
63.3896	4.0105
63.4236	4.0068
63.4586	4.0119
63.4936	4.0109
63.5276	4.006
63.5616	4.0081
63.5946	4.0105
63.6296	4.0005
63.6636	4.0123
63.6986	4.0076
63.7316	3.999
63.7656	4.0052
63.8006	4.0078
63.8347	4.0122
63.8677	4.0026
63.9017	4.0016
63.9357	4.0096
63.9697	4.0064
64.0047	4.01
64.0377	4.0078
64.0717	4.0124
64.1057	4.0116
64.1397	4.0128
64.1737	4.0103
64.2087	4.0059
64.2437	4.0147
64.2777	4.0076
64.3127	4.0121
64.3467	4.0083
64.3807	4.0093
64.4147	4.0074
64.4487	4.0109
64.4827	4.0118
64.5167	4.0083
64.5507	4.0079
64.5847	4.0076
64.6187	4.0039
64.6527	4.008
64.6867	4.0062
64.7217	4.0102
64.7567	4.0119
64.7907	4.0065
64.8257	4.0046
64.8597	4.0032
64.8947	4.0022
64.9287	4.0093
64.9627	4.0048
64.9977	4.002
65.0317	4.0098
65.0667	4.0071
65.0997	4.0009
65.1337	4.0033
65.1677	4.0117
65.2027	4.0128
65.2367	4.01
65.2697	4.0102
65.3047	4.002
65.3387	4.0096
65.3747	4.0068
65.4077	4.0072
65.4417	4.0125
65.4767	4.0032
65.5107	4.0107
65.5447	4.0088
65.5788	4.0105
65.6128	4.005
65.6468	4.0041
65.6818	4.0081
65.7148	4.0095
65.7488	4.0079
65.7828	4.0086
65.8168	4.0082
65.8518	4.006
65.8858	4.0048
65.9188	4.008
65.9528	4.0074
65.9878	4.0155
66.0218	4.0054
66.0558	4.01
66.0898	4.0139
66.1248	4.0068
66.1588	4.011
66.1928	4.0077
66.2268	4.0093
66.2608	4.0101
66.2958	4.015
66.3308	4.0106
66.3648	4.0112
66.3998	4.0067
66.4348	4.0062
66.4678	4.0071
66.5028	4.0099
66.5378	4.0106
66.5728	4.0154
66.6078	4.0179
66.6418	4.0077
66.6748	4.0163
66.7088	4.0132
66.7438	4.0054
66.7778	4.0122
66.8118	4.0092
66.8468	4.0108
66.8808	4.0081
66.9148	4.0019
66.9498	4.0082
66.9838	4.0071
67.0188	4.004
67.0528	4.0035
67.0868	4.008
67.1208	4.0066
67.1548	4.0095
67.1888	4.0043
67.2228	4.0066
67.2568	4.0097
67.2908	4.0071
67.3259	4.0031
67.3599	3.9983
67.3939	3.9873
67.4279	3.9963
67.4619	3.9956
67.4959	3.9927
67.5309	3.9931
67.5649	3.992
67.5989	3.9877
67.6339	3.9946
67.6689	3.9895
67.7029	3.9849
67.7369	3.9888
67.7719	3.9874
67.8059	3.9866
67.8399	3.9849
67.8749	3.9817
67.9089	3.9844
67.9429	3.9837
67.9769	3.9878
68.0109	3.9893
68.0449	3.9881
68.0799	3.9838
68.1139	3.988
68.1489	3.9789
68.1849	3.9774
68.2199	3.9769
[truncated: 7,920 more rows]
