# Supplementary material for: A new insight into RecA filament regulation by RecX from the analysis of conformation-specific interactions
Source: eLife. 2022 Jun 22;11:e78409. doi: 10.7554/eLife.78409 (PMC9252578; doi:10.7554/eLife.78409)
Supplement: Figure 3—source data 1. [file elife-78409-fig3-data1.xlsx]

## Sheet: Fig 3B
	Time, s	L, um
RecA, ATP	0	5.288
	0.035	5.2842
	0.069	5.2703
	0.104	5.2735
	0.139	5.2795
	0.175	5.2786
	0.21	5.2835
	0.245	5.2832
	0.28	5.2832
	0.315	5.2891
	0.35	5.2841
	0.385	5.2906
	0.42	5.2883
	0.455	5.2884
	0.49	5.2815
	0.525	5.2767
	0.56	5.2875
	0.594	5.2882
	0.6291	5.2839
	0.6641	5.2878
	0.6991	5.2801
	0.7341	5.2806
	0.7691	5.2753
	0.8041	5.2813
	0.8391	5.2847
	0.8741	5.2867
	0.9091	5.2868
	0.9441	5.2858
	0.9791	5.2806
	1.0141	5.2781
	1.0491	5.2814
	1.0851	5.2838
	1.1201	5.27
	1.1551	5.2744
	1.1901	5.2683
	1.2251	5.2779
	1.2601	5.2789
	1.2951	5.29
	1.3301	5.2801
	1.3651	5.2846
	1.4011	5.2881
	1.4361	5.2851
	1.4721	5.2769
	1.5061	5.2915
	1.5411	5.2789
	1.5761	5.2803
	1.6111	5.2891
	1.6461	5.2771
	1.6811	5.2626
	1.7181	5.2752
	1.7541	5.2646
	1.7891	5.2808
	1.8241	5.2698
	1.8591	5.2635
	1.8941	5.2713
	1.9291	5.2661
	1.9641	5.2647
	1.9991	5.2653
	2.0341	5.2618
	2.0691	5.2609
	2.1041	5.2646
	2.1391	5.2652
	2.1741	5.2666
	2.2091	5.2694
	2.2441	5.2709
	2.2791	5.2575
	2.3141	5.2589
	2.3501	5.2589
	2.3852	5.2558
	2.4202	5.2488
	2.4552	5.2498
	2.4902	5.2589
	2.5252	5.2405
	2.5592	5.2501
	2.5942	5.2613
	2.6272	5.2715
	2.6622	5.2538
	2.6982	5.2579
	2.7342	5.2725
	2.7692	5.2651
	2.8042	5.2535
	2.8392	5.2512
	2.8742	5.253
	2.9092	5.2547
	2.9442	5.2658
	2.9792	5.2588
	3.0152	5.2639
	3.0492	5.2559
	3.0842	5.2622
	3.1192	5.2442
	3.1542	5.2487
	3.1892	5.2598
	3.2242	5.2517
	3.2602	5.2567
	3.2962	5.2596
	3.3312	5.2567
	3.3662	5.2664
	3.4012	5.2685
	3.4362	5.2614
	3.4712	5.2632
	3.5062	5.2637
	3.5412	5.2639
	3.5762	5.2592
	3.6112	5.2664
	3.6472	5.2553
	3.6822	5.2736
	3.7172	5.2743
	3.7522	5.2748
	3.7862	5.2564
	3.8212	5.2663
	3.8552	5.2647
	3.8902	5.2678
	3.9252	5.2617
	3.9612	5.2671
	3.9962	5.2675
	4.0322	5.271
	4.0662	5.2658
	4.1022	5.2671
	4.1373	5.2629
	4.1723	5.2694
	4.2073	5.2621
	4.2423	5.2691
	4.2783	5.2587
	4.3133	5.2653
	4.3483	5.2643
	4.3833	5.2639
	4.4183	5.2677
	4.4533	5.2755
	4.4883	5.2643
	4.5233	5.2652
	4.5593	5.2696
	4.5943	5.2774
	4.6293	5.2708
	4.6643	5.2685
	4.6993	5.2749
	4.7343	5.2747
	4.7693	5.2719
	4.8043	5.2825
	4.8393	5.273
	4.8743	5.2747
	4.9103	5.2646
	4.9453	5.2608
	4.9803	5.2714
	5.0153	5.2713
	5.0503	5.2732
	5.0853	5.2691
	5.1203	5.2717
	5.1553	5.2505
	5.1903	5.2619
	5.2263	5.2699
	5.2623	5.2626
	5.2963	5.2596
	5.3313	5.262
	5.3663	5.2591
	5.4013	5.2652
	5.4363	5.2554
	5.4713	5.262
	5.5063	5.2606
	5.5423	5.2607
	5.5773	5.267
	5.6123	5.2605
	5.6473	5.2684
	5.6823	5.2662
	5.7173	5.264
	5.7523	5.2571
	5.7873	5.2756
	5.8223	5.2668
	5.8583	5.266
	5.8934	5.2663
	5.9284	5.2633
	5.9634	5.2588
	5.9984	5.2633
	6.0334	5.2656
	6.0684	5.2721
	6.1034	5.2706
	6.1384	5.2819
	6.1734	5.2774
	6.2074	5.2668
	6.2424	5.2768
	6.2774	5.2737
	6.3124	5.2806
	6.3474	5.2726
	6.3824	5.2803
	6.4174	5.2805
	6.4534	5.2718
	6.4884	5.2732
	6.5234	5.268
	6.5594	5.2596
	6.5934	5.2763
	6.6284	5.2792
	6.6634	5.2668
	6.6984	5.2842
	6.7334	5.2715
	6.7674	5.2715
	6.8024	5.2746
	6.8364	5.2614
	6.8714	5.2494
	6.9064	5.2602
	6.9404	5.2691
	6.9754	5.2616
	7.0104	5.2694
	7.0454	5.2659
	7.0804	5.2611
	7.1154	5.2592
	7.1504	5.2543
	7.1854	5.2583
	7.2214	5.2508
	7.2564	5.2597
	7.2914	5.2575
	7.3264	5.2546
	7.3614	5.2639
	7.3964	5.2575
	7.4314	5.2448
	7.4664	5.259
	7.5024	5.2611
	7.5364	5.2551
	7.5714	5.2559
	7.6074	5.2655
	7.6415	5.2634
	7.6765	5.2687
	7.7125	5.2624
	7.7475	5.2673
	7.7825	5.264
	7.8175	5.2572
	7.8535	5.2652
	7.8875	5.2509
	7.9225	5.255
	7.9575	5.2584
	7.9925	5.2491
	8.0275	5.2448
	8.0625	5.2474
	8.0975	5.2502
	8.1325	5.2578
	8.1675	5.2605
	8.2025	5.2587
	8.2375	5.2555
	8.2725	5.2589
	8.3075	5.2562
	8.3425	5.2568
	8.3775	5.2558
	8.4125	5.2468
	8.4475	5.2469
	8.4825	5.2434
	8.5175	5.2507
	8.5525	5.2663
	8.5875	5.2601
	8.6225	5.2647
	8.6575	5.2544
	8.6925	5.2654
	8.7275	5.257
	8.7625	5.2666
	8.7975	5.2627
	8.8325	5.2602
	8.8675	5.2642
	8.9035	5.2634
	8.9385	5.2643
	8.9735	5.2621
	9.0085	5.2551
	9.0435	5.2557
	9.0785	5.2678
	9.1135	5.2656
	9.1495	5.2745
	9.1835	5.2741
	9.2205	5.2671
	9.2545	5.2706
	9.2895	5.2718
	9.3245	5.262
	9.3585	5.2675
	9.3936	5.2649
	9.4286	5.2694
	9.4636	5.268
	9.4996	5.2781
	9.5346	5.2786
	9.5696	5.2776
	9.6036	5.2707
	9.6386	5.2682
	9.6726	5.2659
	9.7076	5.263
	9.7426	5.2687
	9.7776	5.2789
	9.8116	5.2586
	9.8476	5.2669
	9.8826	5.2697
	9.9186	5.2632
	9.9526	5.2591
	9.9876	5.2616
	10.0226	5.2686
	10.0566	5.2572
	10.0916	5.2633
	10.1256	5.269
	10.1606	5.2681
	10.1956	5.2622
	10.2316	5.2484
	10.2676	5.2562
	10.3016	5.2624
	10.3366	5.2545
	10.3706	5.2672
	10.4056	5.2588
	10.4406	5.2578
	10.4756	5.263
	10.5096	5.2451
	10.5446	5.2659
	10.5806	5.2527
	10.6156	5.2657
	10.6496	5.2647
	10.6846	5.267
	10.7196	5.2589
	10.7546	5.2658
	10.7886	5.2577
	10.8236	5.2683
	10.8586	5.2648
	10.8946	5.2793
	10.9296	5.2675
	10.9646	5.2637
	10.9996	5.2711
	11.0336	5.2642
	11.0686	5.2681
	11.1036	5.2732
	11.1387	5.2703
	11.1737	5.28
	11.2087	5.2891
	11.2437	5.2722
	11.2787	5.2781
	11.3137	5.2871
	11.3487	5.275
	11.3837	5.2736
	11.4187	5.2822
	11.4537	5.2742
	11.4887	5.2706
	11.5237	5.2635
	11.5597	5.2725
	11.5947	5.2684
	11.6297	5.2617
	11.6647	5.2744
	11.6997	5.2677
	11.7347	5.2762
	11.7697	5.2693
	11.8047	5.2684
	11.8397	5.2685
	11.8747	5.2666
	11.9107	5.2689
	11.9447	5.2708
	11.9797	5.2676
	12.0147	5.2659
	12.0497	5.2562
	12.0847	5.2768
	12.1187	5.2697
	12.1537	5.2702
	12.1887	5.2806
	12.2237	5.2786
	12.2597	5.2689
	12.2937	5.2765
	12.3287	5.2704
	12.3637	5.2707
	12.3977	5.2679
	12.4327	5.2649
	12.4667	5.2585
	12.5007	5.2577
	12.5357	5.2647
	12.5707	5.2729
	12.6067	5.2621
	12.6407	5.2675
	12.6757	5.2624
	12.7107	5.2668
	12.7457	5.2671
	12.7807	5.2594
	12.8157	5.2682
	12.8507	5.255
	12.8858	5.2518
	12.9208	5.2573
	12.9568	5.261
	12.9918	5.2623
	13.0268	5.2562
	13.0618	5.2523
	13.0968	5.2609
	13.1308	5.2481
	13.1658	5.25
	13.2008	5.2596
	13.2358	5.2598
	13.2708	5.2602
	13.3068	5.2712
	13.3418	5.253
	13.3768	5.264
	13.4118	5.2634
	13.4468	5.266
	13.4818	5.2574
	13.5168	5.277
	13.5518	5.2731
	13.5868	5.2684
	13.6228	5.2745
	13.6578	5.2741
	13.6928	5.2725
	13.7278	5.2739
	13.7628	5.2725
	13.7978	5.2725
	13.8328	5.2786
	13.8678	5.2912
	13.9038	5.2876
	13.9388	5.2721
	13.9748	5.2762
	14.0098	5.2782
	14.0448	5.2917
	14.0798	5.2828
	14.1148	5.2808
	14.1498	5.2743
	14.1848	5.2725
	14.2208	5.273
	14.2548	5.2754
	14.2898	5.2798
	14.3248	5.2842
	14.3598	5.2895
	14.3948	5.2769
	14.4298	5.292
	14.4648	5.2892
	14.4998	5.2948
	14.5358	5.286
	14.5708	5.2764
	14.6059	5.283
	14.6409	5.2777
	14.6759	5.2786
	14.7109	5.2841
	14.7449	5.2757
	14.7799	5.2729
	14.8149	5.2726
	14.8499	5.2835
	14.8859	5.28
	14.9209	5.259
	14.9559	5.2704
	14.9909	5.2778
	15.0259	5.2668
	15.0609	5.274
	15.0949	5.257
	15.1299	5.2649
	15.1649	5.2691
	15.2009	5.2777
	15.2359	5.2706
	15.2709	5.2662
	15.3059	5.2681
	15.3409	5.2835
	15.3759	5.2852
	15.4109	5.2862
	15.4459	5.2747
	15.4799	5.2826
	15.5149	5.2787
	15.5509	5.2807
	15.5869	5.2772
	15.6219	5.2783
	15.6559	5.2896
	15.6909	5.2893
	15.7259	5.286
	15.7609	5.2721
	15.7959	5.2753
	15.8309	5.2698
	15.8659	5.2726
	15.9009	5.2776
	15.9359	5.2804
	15.9699	5.2818
	16.0049	5.2773
	16.0399	5.2781
	16.0739	5.2746
	16.1089	5.2738
	16.1439	5.265
	16.1779	5.2705
	16.2129	5.2714
	16.2489	5.2637
	16.2839	5.2778
	16.3189	5.2686
	16.354	5.2746
	16.389	5.2756
	16.424	5.2917
	16.459	5.2811
	16.494	5.2842
	16.529	5.2735
	16.565	5.2914
	16.6	5.2751
	16.635	5.2858
	16.669	5.2741
	16.704	5.2714
	16.739	5.2672
	16.774	5.2815
	16.809	5.28
	16.844	5.2874
	16.879	5.2802
	16.914	5.278
	16.949	5.2791
	16.984	5.2794
	17.019	5.2821
	17.054	5.2793
	17.089	5.2771
	17.123	5.2776
	17.158	5.2762
	17.193	5.2775
	17.229	5.2706
	17.264	5.2858
	17.299	5.2891
	17.334	5.2774
	17.369	5.2751
	17.404	5.2638
	17.439	5.2705
	17.474	5.2719
	17.508	5.2708
	17.543	5.2704
	17.579	5.2813
	17.615	5.2767
	17.649	5.2732
	17.684	5.27
	17.719	5.2821
	17.754	5.2666
	17.789	5.2725
	17.824	5.27
	17.859	5.2664
	17.895	5.28
	17.929	5.2846
	17.965	5.2669
	17.999	5.2763
	18.034	5.2813
	18.069	5.273
	18.1031	5.2803
	18.1381	5.272
	18.1721	5.2769
	18.2071	5.2668
	18.2421	5.2679
	18.2781	5.2792
	18.3131	5.2711
	18.3481	5.2839
	18.3831	5.2782
	18.4181	5.2813
	18.4531	5.282
	18.4881	5.2732
	18.5231	5.2747
	18.5581	5.2761
	18.5931	5.2681
	18.6281	5.2657
	18.6631	5.2583
	18.6981	5.2688
	18.7331	5.2572
	18.7681	5.261
	18.8031	5.257
	18.8381	5.2596
	18.8731	5.2616
	18.9091	5.2626
	18.9431	5.2629
	18.9781	5.2652
	19.0131	5.2646
	19.0481	5.2568
	19.0831	5.2609
	19.1171	5.2606
	19.1521	5.2593
	19.1871	5.2632
	19.2221	5.2584
	19.2581	5.2647
	19.2921	5.2576
	19.3281	5.2609
	19.3621	5.2593
	19.3971	5.2642
	19.4311	5.2784
	19.4661	5.2685
	19.5011	5.2588
	19.5361	5.2545
	19.5711	5.2552
	19.6071	5.2669
	19.6421	5.2599
	19.6771	5.2645
	19.7121	5.2566
	19.7471	5.2627
	19.7821	5.2597
	19.8171	5.2688
	19.8522	5.2666
	19.8872	5.2564
	19.9232	5.2654
	19.9582	5.2671
	19.9942	5.2511
	20.0282	5.2561
	20.0632	5.2506
	20.0972	5.2487
	20.1322	5.2515
	20.1672	5.2626
	20.2012	5.2618
	20.2352	5.2604
	20.2702	5.2496
	20.3052	5.2583
	20.3402	5.2602
	20.3752	5.2521
	20.4102	5.2564
	20.4442	5.2587
	20.4792	5.2643
	20.5142	5.2673
	20.5492	5.2692
	20.5842	5.2719
	20.6192	5.2693
	20.6552	5.2705
	20.6892	5.2695
	20.7242	5.2737
	20.7592	5.2773
	20.7932	5.273
	20.8282	5.2773
	20.8632	5.2653
	20.8982	5.2666
	20.9332	5.2757
	20.9672	5.2652
	21.0032	5.2669
	21.0382	5.2711
	21.0732	5.2694
	21.1092	5.2652
	21.1442	5.2734
	21.1782	5.2664
	21.2122	5.2733
	21.2472	5.2639
	21.2822	5.2747
	21.3172	5.2646
	21.3512	5.2752
	21.3872	5.2664
	21.4212	5.2686
	21.4572	5.2818
	21.4912	5.2823
	21.5262	5.2763
	21.5612	5.2703
	21.5952	5.2645
	21.6303	5.2711
	21.6653	5.2848
	21.7003	5.2667
	21.7353	5.2803
	21.7703	5.2792
	21.8043	5.2742
	21.8393	5.2791
	21.8743	5.2771
	21.9093	5.2692
	21.9433	5.2784
	21.9783	5.28
	22.0133	5.2768
	22.0483	5.2828
	22.0843	5.2789
	22.1193	5.268
	22.1543	5.2721
	22.1893	5.2825
	22.2243	5.267
	22.2593	5.2826
	22.2943	5.2655
	22.3293	5.2662
	22.3643	5.2704
	22.4003	5.2627
	22.4353	5.2621
	22.4693	5.2642
	22.5043	5.2709
	22.5393	5.2692
	22.5743	5.2691
	22.6093	5.2658
	22.6433	5.2774
	22.6783	5.2709
	22.7133	5.2769
	22.7493	5.2601
	22.7843	5.2707
	22.8193	5.2824
	22.8543	5.2688
	22.8893	5.2733
	22.9233	5.2613
	22.9583	5.2823
	22.9933	5.2727
	23.0273	5.2637
	23.0623	5.2673
	23.0973	5.267
	23.1333	5.2661
	23.1673	5.2727
	23.2033	5.2638
	23.2373	5.2631
	23.2723	5.2617
	23.3073	5.2626
	23.3423	5.2753
	23.3774	5.2788
	23.4124	5.2755
	23.4484	5.2695
	23.4824	5.2736
	23.5174	5.2727
	23.5524	5.2789
	23.5874	5.2929
	23.6224	5.2828
	23.6574	5.2769
	23.6924	5.2673
	23.7274	5.2777
	23.7634	5.2751
	23.7984	5.2681
	23.8344	5.2629
	23.8684	5.2648
	23.9034	5.2667
	23.9384	5.2711
	23.9734	5.2781
	24.0084	5.2743
	24.0434	5.2706
	24.0794	5.2737
	24.1144	5.2848
	24.1494	5.2699
	24.1844	5.275
	24.2194	5.2844
	24.2544	5.2753
	24.2894	5.2811
	24.3244	5.2902
	24.3594	5.2816
	24.3934	5.2811
	24.4304	5.2793
	24.4644	5.2911
	24.4994	5.2874
	24.5344	5.2984
	24.5694	5.2957
	24.6044	5.2953
	24.6394	5.2863
	24.6744	5.2841
	24.7094	5.2698
	24.7444	5.2816
	24.7794	5.2906
	24.8154	5.2847
	24.8494	5.2866
	24.8844	5.2879
	24.9194	5.275
	24.9544	5.2744
	24.9894	5.2901
	25.0244	5.2815
	25.0594	5.2793
	25.0955	5.2745
	25.1305	5.2737
	25.1655	5.2948
	25.2005	5.2746
	25.2355	5.2694
	25.2705	5.2623
	25.3045	5.2635
	25.3395	5.2656
	25.3745	5.2795
	25.4095	5.2732
	25.4445	5.2765
	25.4805	5.281
	25.5145	5.2798
	25.5495	5.2805
	25.5835	5.2751
	25.6185	5.2781
	25.6535	5.2796
	25.6885	5.2752
	25.7225	5.2758
	25.7575	5.267
	25.7935	5.2771
	25.8295	5.2582
	25.8645	5.2569
	25.8995	5.2611
	25.9345	5.2767
	25.9695	5.2846
	26.0045	5.2773
	26.0385	5.2811
	26.0745	5.2818
	26.1095	5.2761
	26.1435	5.2798
	26.1785	5.279
	26.2135	5.2738
	26.2485	5.2768
	26.2835	5.2755
	26.3175	5.2718
	26.3525	5.2699
	26.3875	5.2764
	26.4215	5.2728
	26.4565	5.2752
	26.4915	5.2684
	26.5265	5.2679
	26.5615	5.2681
	26.5955	5.2689
	26.6305	5.2732
	26.6655	5.2802
	26.7005	5.2734
	26.7355	5.2803
	26.7705	5.2734
	26.8065	5.2725
	26.8406	5.2688
	26.8756	5.273
	26.9106	5.281
	26.9456	5.2799
	26.9806	5.2756
	27.0156	5.2795
	27.0506	5.2785
	27.0846	5.2842
	27.1196	5.2752
	27.1556	5.2673
	27.1896	5.2831
	27.2246	5.2833
	27.2596	5.2778
	27.2946	5.2814
	27.3296	5.2761
	27.3646	5.278
	27.3996	5.2776
	27.4346	5.2809
	27.4696	5.2817
	27.5046	5.2714
	27.5396	5.2757
	27.5756	5.2715
	27.6096	5.2764
	27.6436	5.2731
	27.6786	5.2774
	27.7136	5.2826
	27.7486	5.2839
	27.7836	5.2836
	27.8186	5.2856
	27.8536	5.2773
	27.8886	5.2792
	27.9236	5.264
	27.9586	5.2709
	27.9936	5.2802
	28.0286	5.2815
	28.0636	5.2898
	28.0986	5.284
	28.1336	5.2863
	28.1696	5.2809
	28.2046	5.2844
	28.2406	5.294
	28.2756	5.2859
	28.3106	5.2866
	28.3446	5.2838
	28.3796	5.2702
	28.4146	5.2718
	28.4496	5.2713
	28.4856	5.2796
	28.5196	5.2838
	28.5546	5.2815
	28.5896	5.2784
	28.6247	5.2762
	28.6597	5.2842
	28.6947	5.2951
	28.7297	5.2872
	28.7647	5.2887
	28.7997	5.2853
	28.8357	5.273
	28.8707	5.2806
	28.9057	5.2836
	28.9407	5.2792
	28.9757	5.2756
	29.0107	5.2935
	29.0457	5.2911
	29.0807	5.279
	29.1157	5.2785
	29.1517	5.2828
	29.1867	5.2819
	29.2217	5.2794
	29.2567	5.2826
	29.2917	5.2802
	29.3257	5.279
	29.3607	5.2821
	29.3957	5.2928
	29.4307	5.293
	29.4667	5.2866
	29.5017	5.2891
	29.5367	5.2891
	29.5717	5.2807
	29.6067	5.283
	29.6417	5.2711
	29.6767	5.2844
	29.7117	5.266
	29.7467	5.2655
	29.7827	5.2635
	29.8177	5.2642
	29.8527	5.2712
	29.8877	5.2658
	29.9227	5.2594
	29.9577	5.2637
	29.9927	5.2634
	30.0277	5.2695
	30.0627	5.2661
	30.0987	5.2638
	30.1337	5.2801
	30.1687	5.2722
	30.2027	5.2724
	30.2377	5.2706
	30.2727	5.2726
	30.3077	5.2742
	30.3418	5.27
	30.3768	5.2694
	30.4118	5.2794
	30.4468	5.2691
	30.4818	5.2739
	30.5178	5.2857
	30.5518	5.2779
	30.5868	5.2847
	30.6218	5.2843
	30.6568	5.2742
	30.6918	5.2784
	30.7268	5.2733
	30.7618	5.2883
	30.7968	5.2715
	30.8318	5.275
	30.8668	5.2753
	30.9018	5.2677
	30.9368	5.2776
	30.9718	5.2747
	31.0068	5.2766
	31.0418	5.2734
	31.0768	5.2696
	31.1128	5.276
	31.1478	5.2719
	31.1828	5.2673
	31.2178	5.2745
	31.2528	5.2813
	31.2878	5.2869
	31.3228	5.2732
	31.3578	5.2691
	31.3918	5.2738
	31.4268	5.2729
	31.4628	5.2862
	31.4978	5.2766
	31.5328	5.2718
	31.5678	5.2759
	31.6028	5.275
	31.6388	5.279
	31.6738	5.287
	31.7088	5.2838
	31.7448	5.2854
	31.7788	5.2863
	31.8138	5.2724
	31.8488	5.2856
	31.8838	5.2826
	31.9198	5.2766
	31.9538	5.2735
	31.9888	5.2752
	32.0238	5.2679
	32.0578	5.2805
	32.0929	5.2769
	32.1279	5.2571
	32.1639	5.2576
	32.1979	5.2647
	32.2319	5.2687
	32.2669	5.2735
	32.3009	5.2733
	32.3359	5.2694
	32.3719	5.2769
	32.4059	5.2896
	32.4409	5.2709
	32.4769	5.2745
	32.5109	5.2736
	32.5469	5.2691
	32.5819	5.2567
	32.6169	5.263
	32.6519	5.2635
	32.6869	5.2664
	32.7219	5.2618
	32.7569	5.2744
	32.7919	5.2715
	32.8269	5.2735
	32.8609	5.2772
	32.8959	5.2782
	32.9309	5.2667
	32.9649	5.2689
	32.9999	5.2794
	33.0349	5.2703
	33.0699	5.2725
	33.1049	5.2595
	33.1389	5.2673
	33.1739	5.2711
	33.2089	5.2786
	33.2449	5.2691
	33.2799	5.281
	33.3149	5.2732
	33.3499	5.273
	33.3849	5.2599
	33.4199	5.2732
	33.4549	5.2673
	33.4899	5.2823
	33.5249	5.2713
	33.5609	5.2728
	33.5949	5.2846
	33.6299	5.2742
	33.6649	5.269
	33.6999	5.2745
	33.7349	5.2759
	33.7699	5.2709
	33.8049	5.2665
	33.84	5.2654
	33.875	5.2609
	33.91	5.2676
	33.945	5.2729
	33.98	5.2785
	34.014	5.2799
	34.049	5.2742
	34.084	5.2634
	34.119	5.2724
	34.154	5.2761
	34.19	5.2662
	34.226	5.2824
	34.26	5.2844
	34.295	5.2806
	34.33	5.2796
	34.365	5.2746
	34.4	5.2639
	34.434	5.2681
	34.469	5.2696
	34.506	5.2632
	34.54	5.269
	34.575	5.2692
	34.61	5.2747
	34.645	5.2625
	34.68	5.2611
	34.715	5.2709
	34.749	5.2689
	34.784	5.2635
	34.82	5.2609
	34.855	5.2589
	34.89	5.2798
	34.925	5.2733
	34.96	5.2611
	34.995	5.2766
	35.03	5.2698
	35.064	5.2579
	35.099	5.2688
	35.134	5.2618
	35.169	5.2618
	35.204	5.2627
	35.239	5.2661
	35.274	5.2687
	35.309	5.2784
	35.344	5.2769
	35.38	5.2697
	35.415	5.2713
	35.45	5.2736
	35.485	5.26
	35.52	5.265
	35.555	5.2604
	35.5901	5.2713
	35.6251	5.2611
	35.6601	5.2694
	35.6951	5.2711
	35.7301	5.2785
	35.7651	5.2699
	35.8011	5.252
	35.8361	5.2528
	35.8711	5.2551
	35.9061	5.2634
	35.9411	5.2668
	35.9761	5.2587
	36.0111	5.256
	36.0461	5.2508
	36.0811	5.2588
	36.1161	5.2537
	36.1521	5.2608
	36.1871	5.263
	36.2221	5.2639
	36.2571	5.2572
	36.2921	5.2559
	36.3271	5.2521
	36.3621	5.2672
	36.3971	5.2577
	36.4331	5.269
	36.4681	5.257
	36.5031	5.2572
	36.5381	5.2719
	36.5731	5.257
	36.6081	5.2515
	36.6431	5.2692
	36.6781	5.2662
	36.7131	5.2708
	36.7491	5.2662
	36.7841	5.2706
	36.8191	5.2718
	36.8541	5.2662
	36.8891	5.2706
	36.9241	5.2723
	36.9591	5.2663
	36.9941	5.2698
	37.0291	5.2739
	37.0651	5.2814
	37.1011	5.2833
	37.1361	5.2688
	37.1701	5.2589
	37.2041	5.2634
	37.2391	5.2635
	37.2741	5.263
	37.3101	5.2672
	37.3442	5.2707
	37.3792	5.2685
	37.4152	5.2656
	37.4492	5.2679
	37.4852	5.2647
	37.5202	5.2645
	37.5552	5.2563
	37.5902	5.2544
	37.6252	5.2596
	37.6592	5.2521
	37.6942	5.2575
	37.7302	5.26
	37.7652	5.265
	37.8002	5.2679
	37.8352	5.2694
	37.8702	5.266
	37.9052	5.2743
	37.9402	5.2721
	37.9752	5.2668
	38.0102	5.2711
	38.0452	5.2761
	38.0802	5.2707
	38.1152	5.2718
	38.1502	5.2789
	38.1852	5.2762
	38.2202	5.2697
	38.2552	5.2772
	38.2902	5.2727
	38.3252	5.287
	38.3612	5.2711
	38.3962	5.2833
	38.4312	5.2787
	38.4662	5.2866
	38.5012	5.2855
	38.5362	5.2857
	38.5712	5.2758
	38.6052	5.2792
	38.6402	5.2694
	38.6752	5.2838
	38.7112	5.2718
	38.7462	5.2587
	38.7812	5.2628
	38.8162	5.2632
	38.8512	5.2583
	38.8862	5.2604
	38.9212	5.2522
	38.9562	5.2465
	38.9912	5.2489
	39.0272	5.2583
	39.0622	5.2553
	39.0973	5.2581
	39.1323	5.266
	39.1673	5.2663
	39.2023	5.2544
	39.2373	5.2574
	39.2723	5.2616
	39.3073	5.268
	39.3433	5.2558
	39.3783	5.2671
	39.4133	5.2666
	39.4483	5.2599
	39.4833	5.2633
	39.5193	5.2467
	39.5533	5.2555
	39.5883	5.2566
	39.6233	5.2493
	39.6603	5.2601
	39.6953	5.2439
	39.7303	5.2515
	39.7653	5.2508
	39.8003	5.2403
	39.8353	5.2474
	39.8703	5.2402
	39.9053	5.2396
	39.9413	5.2472
	39.9763	5.2555
	40.0113	5.2462
	40.0463	5.2412
	40.0813	5.2484
	40.1163	5.2376
	40.1513	5.2518
	40.1853	5.2553
	40.2203	5.2405
	40.2553	5.2444
	40.2903	5.2561
	40.3253	5.2452
	40.3603	5.2654
	40.3953	5.2485
	40.4303	5.2532
	40.4653	5.2677
	40.5013	5.2593
	40.5353	5.2511
	40.5703	5.263
	40.6063	5.2501
	40.6413	5.2552
	40.6763	5.2586
	40.7113	5.2545
	40.7453	5.2543
	40.7803	5.2617
	40.8153	5.2508
	40.8504	5.2542
	40.8854	5.2516
	40.9204	5.2391
	40.9554	5.2433
	40.9904	5.2472
	41.0254	5.2535
	41.0604	5.259
	41.0954	5.256
	41.1304	5.2626
	41.1654	5.2543
	41.2004	5.256
	41.2354	5.2622
	41.2714	5.2661
	41.3064	5.2436
	41.3404	5.2581
	41.3754	5.2543
	41.4104	5.2498
	41.4454	5.2585
	41.4804	5.2658
	41.5154	5.2633
	41.5504	5.2639
	41.5864	5.2696
	41.6204	5.2733
	41.6554	5.2745
	41.6904	5.2694
	41.7254	5.2674
	41.7604	5.2709
	41.7954	5.2609
	41.8304	5.2587
	41.8644	5.264
	41.8994	5.2591
	41.9344	5.2514
	41.9694	5.251
	42.0044	5.2581
Buffer	42.0394	5.25
	42.0744	5.2381
	42.1084	5.2379
	42.1434	5.2482
	42.1784	5.2455
	42.2134	5.2526
	42.2484	5.2385
	42.2834	5.2431
	42.3194	5.2328
	42.3544	5.2249
	42.3894	5.2357
	42.4244	5.2277
	42.4584	5.2236
	42.4934	5.2202
	42.5284	5.1974
	42.5634	5.1787
	42.5995	5.1693
	42.6345	5.1488
	42.6685	5.1246
	42.7025	5.1089
	42.7385	5.0862
	42.7725	5.0597
	42.8075	5.0452
	42.8425	5.0197
	42.8775	4.9994
	42.9125	4.9561
	42.9475	4.9258
	42.9835	4.915
	43.0185	4.8877
	43.0545	4.8619
	43.0895	4.8367
	43.1245	4.8106
	43.1595	4.7855
	43.1945	4.7675
	43.2295	4.7432
	43.2645	4.721
	43.3015	4.6954
	43.3355	4.679
	43.3705	4.6504
	43.4055	4.637
	43.4405	4.6169
	43.4755	4.5964
	43.5105	4.5809
	43.5455	4.557
	43.5805	4.5444
	43.6155	4.5247
	43.6505	4.502
	43.6855	4.4867
	43.7205	4.4688
	43.7555	4.4576
	43.7905	4.4408
	43.8255	4.4216
	43.8605	4.4077
	43.8955	4.3859
	43.9315	4.3745
	43.9665	4.358
	44.0015	4.3405
	44.0365	4.3322
	44.0715	4.3211
	44.1065	4.309
	44.1415	4.298
	44.1765	4.2803
	44.2115	4.2729
	44.2475	4.2594
	44.2825	4.2486
	44.3175	4.2307
	44.3526	4.2264
	44.3876	4.2105
	44.4226	4.1964
	44.4576	4.1922
	44.4916	4.1918
	44.5266	4.1755
	44.5606	4.1778
	44.5976	4.1712
	44.6336	4.1614
	44.6686	4.1518
	44.7036	4.1446
	44.7376	4.1449
	44.7726	4.1451
	44.8076	4.1352
	44.8426	4.1271
	44.8776	4.1187
	44.9136	4.1172
	44.9496	4.118
	44.9846	4.1157
	45.0196	4.1069
	45.0546	4.1067
	45.0896	4.1032
	45.1246	4.111
	45.1596	4.1023
	45.1946	4.0963
	45.2296	4.0887
	45.2646	4.0862
	45.2996	4.0881
	45.3346	4.0813
	45.3696	4.0811
	45.4046	4.0841
	45.4396	4.0753
	45.4746	4.08
	45.5096	4.0711
	45.5456	4.078
	45.5806	4.072
	45.6156	4.069
	45.6506	4.0684
	45.6856	4.0619
	45.7206	4.0722
	45.7556	4.0701
	45.7906	4.0705
	45.8266	4.0643
	45.8616	4.0625
	45.8976	4.0636
	45.9316	4.0642
	45.9666	4.0616
	46.0016	4.0584
	46.0366	4.059
	46.0716	4.063
	46.1057	4.064
	46.1407	4.0576
	46.1767	4.0625
	46.2117	4.0561
	46.2467	4.0642
	46.2807	4.062
	46.3157	4.0618
	46.3507	4.0698
	46.3857	4.0655
	46.4207	4.0578
	46.4557	4.0582
	46.4907	4.067
	46.5257	4.0597
	46.5607	4.0597
	46.5957	4.058
	46.6307	4.0581
	46.6657	4.063
	46.7007	4.0526
	46.7357	4.0584
	46.7707	4.0598
	46.8057	4.051
	46.8407	4.0502
	46.8757	4.054
	46.9107	4.05
	46.9457	4.0522
	46.9807	4.0477
	47.0157	4.0481
	47.0507	4.0516
	47.0857	4.0477
	47.1207	4.0472
	47.1547	4.0531
	47.1907	4.0531
	47.2257	4.054
	47.2607	4.0521
	47.2957	4.0525
	47.3307	4.051
	47.3657	4.0508
	47.4007	4.0558
	47.4357	4.0496
	47.4707	4.0485
	47.5067	4.0516
	47.5417	4.0494
	47.5767	4.0526
	47.6117	4.0498
	47.6467	4.0488
	47.6817	4.0536
	47.7167	4.0512
	47.7517	4.0499
	47.7867	4.0577
	47.8238	4.055
	47.8598	4.0536
	47.8948	4.0522
	47.9298	4.0514
	47.9638	4.0506
	47.9988	4.0378
	48.0338	4.0321
	48.0688	4.0309
	48.1038	4.0383
	48.1388	4.0314
	48.1738	4.0339
	48.2088	4.0332
	48.2438	4.0284
	48.2788	4.0282
	48.3138	4.0287
	48.3488	4.032
	48.3838	4.027
	48.4188	4.0323
	48.4548	4.0297
	48.4888	4.0322
	48.5228	4.0304
	48.5578	4.0319
	48.5928	4.0274
	48.6278	4.0325
	48.6638	4.0334
	48.6988	4.029
	48.7328	4.0252
	48.7678	4.0263
	48.8038	4.028
	48.8398	4.0243
	48.8738	4.0224
	48.9088	4.0239
	48.9428	4.022
	48.9778	4.0274
	49.0128	4.0207
	49.0478	4.0234
	49.0828	4.0244
	49.1178	4.0251
	49.1528	4.0293
	49.1868	4.0296
	49.2218	4.0245
	49.2568	4.0273
	49.2918	4.0251
	49.3258	4.0227
	49.3608	4.0223
	49.3958	4.0207
	49.4308	4.0183
	49.4658	4.0162
	49.5018	4.0165
	49.5358	4.014
	49.5718	4.0142
	49.6059	4.0125
	49.6409	4.0129
	49.6759	4.0144
	49.7109	4.0132
	49.7449	4.0153
	49.7799	4.0098
	49.8149	4.0125
	49.8509	4.0128
	49.8859	4.0082
	49.9209	4.0099
	49.9559	4.0101
	49.9909	4.0061
	50.0259	4.015
	50.0599	4.0107
	50.0949	4.007
	50.1299	4.0128
	50.1659	4.0148
	50.2009	4.0155
	50.2369	4.0128
	50.2709	4.012
	50.3059	4.0079
	50.3409	4.0058
	50.3759	4.0087
	50.4109	4.0097
	50.4459	4.007
	50.4809	4.0083
	50.5159	4.0066
	50.5509	4.0077
	50.5859	4.0078
	50.6209	4.0102
	50.6559	4.0023
	50.6909	4.0062
	50.7259	4.0055
	50.7609	4.0035
	50.7959	4.0065
	50.8309	4.0075
	50.8659	4.0086
	50.9019	4.0064
	50.9359	4.0087
	50.9709	4.0071
	51.0059	4.0124
	51.0409	4.0092
	51.0759	4.0109
	51.1109	4.0122
	51.1459	4.0126
	51.1809	4.0105
	51.2159	4.0124
	51.2509	4.0111
	51.2859	4.0099
	51.321	4.0037
	51.356	4.0079
	51.391	4.0054
	51.426	4.0041
	51.46	4.0019
	51.495	4.0046
	51.53	4.0007
	51.565	4.0045
	51.6	4.0035
	51.635	4.0047
	51.67	4.0015
	51.705	4.0015
	51.74	4
	51.774	4.0035
	51.809	3.9975
	51.844	3.9999
	51.879	3.9925
	51.914	3.992
	51.95	3.9973
	51.984	3.994
	52.019	3.997
	52.054	3.9978
	52.089	3.9983
	52.124	3.9983
	52.159	4.0004
	52.193	4.0046
	52.229	3.9954
	52.264	4.0017
	52.299	3.998
	52.334	4.0032
	52.369	4.0013
	52.404	4.0002
	52.439	3.9998
	52.474	4.0068
	52.509	4.0041
	52.545	4.004
	52.579	4.0056
	52.614	4.0046
	52.649	4.0057
	52.684	4.0067
	52.719	4.003
	52.754	4.0045
	52.789	4.0032
	52.824	4.0055
	52.86	4.0064
	52.895	4.0044
	52.931	4.0017
	52.965	4.0006
	53	4.0028
	53.035	4.0002
	53.07	4.0053
	53.1051	3.9998
	53.1401	3.9979
	53.1761	3.9988
	53.2101	3.9964
	53.2451	3.9924
	53.2801	3.9986
	53.3151	3.9905
	53.3491	3.9967
	53.3841	3.9955
	53.4191	3.9988
	53.4551	3.9935
	53.4911	3.9914
	53.5261	3.9888
	53.5621	3.9889
	53.5971	3.9926
	53.6321	3.9928
	53.6671	3.9898
	53.7021	3.988
	53.7371	3.9887
	53.7721	3.9844
	53.8081	3.9872
	53.8421	3.982
	53.8781	3.9825
	53.9131	3.9811
	53.9481	3.9789
	53.9831	3.9821
	54.0181	3.9838
	54.0531	3.9837
	54.0881	3.9835
	54.1231	3.983
	54.1581	3.9734
	54.1941	3.9843
	54.2291	3.983
	54.2641	3.9822
	54.2991	3.9871
	54.3341	3.9912
	54.3691	3.9885
	54.4041	3.9904
	54.4401	3.9901
	54.4761	3.9941
	54.5101	3.9873
	54.5441	3.9932
	54.5791	3.9933
	54.6131	3.9967
	54.6471	3.9949
	54.6821	3.9978
	54.7171	3.9977
	54.7521	4.0001
	54.7871	4.001
	54.8222	3.9965
	54.8562	3.9996
	54.8922	3.994
	54.9262	3.9872
	54.9612	3.9991
	54.9962	3.9973
	55.0312	3.9896
	55.0662	3.9933
	55.1012	3.9927
	55.1372	3.9999
	55.1722	3.9955
	55.2082	3.9979
	55.2422	3.9931
	55.2762	3.998
	55.3112	3.9962
	55.3462	3.9924
	55.3812	3.9992
	55.4162	3.9904
	55.4512	3.9943
	55.4872	3.9943
	55.5222	3.9891
	55.5572	3.9942
	55.5922	3.9959
	55.6272	4.0005
	55.6612	3.9969
	55.6962	3.9898
	55.7312	3.9952
	55.7662	3.9918
	55.8012	3.9975
	55.8362	3.9954
	55.8712	3.9925
	55.9072	3.9926
	55.9412	3.9946
	55.9752	3.9901
	56.0102	3.984
	56.0452	3.9872
	56.0802	3.9908
	56.1152	3.9885
	56.1502	3.9929
	56.1852	3.9915
	56.2202	3.9899
	56.2562	3.9873
	56.2902	3.9912
	56.3252	3.9864
	56.3602	3.9873
	56.3952	3.987
	56.4302	3.9871
	56.4652	3.9852
	56.5002	3.9854
	56.5362	3.9907
	56.5713	3.9858
	56.6063	3.9856
	56.6413	3.988
	56.6763	3.9831
	56.7113	3.9862
	56.7463	3.9892
	56.7813	3.9871
	56.8173	3.9847
	56.8523	3.9886
	56.8883	3.9841
	56.9223	3.9901
	56.9573	3.9873
	56.9923	3.9862
	57.0273	3.9793
	57.0613	3.9838
	57.0963	3.9806
	57.1303	3.9884
	57.1673	3.9867
	57.2023	3.9851
	57.2373	3.9826
	57.2723	3.9887
	57.3073	3.9871
	57.3423	3.9945
	57.3773	3.9894
	57.4123	3.9859
	57.4473	3.9939
	57.4823	3.989
	57.5173	3.9854
	57.5533	3.9902
	57.5873	3.9846
	57.6223	3.9892
	57.6573	3.9857
	57.6923	3.9927
	57.7273	3.9888
	57.7623	3.9937
	57.7983	3.9913
	57.8343	3.9953
	57.8683	3.9846
	57.9033	3.986
	57.9383	3.9879
	57.9733	3.9865
	58.0083	3.9854
	58.0433	3.9895
	58.0783	3.985
	58.1133	3.9875
	58.1483	3.9881
	58.1843	3.9881
	58.2193	3.9862
	58.2543	3.9832
	58.2893	3.9875
	58.3244	3.9891
	58.3594	3.9826
	58.3944	3.9823
	58.4294	3.988
	58.4644	3.9873
	58.4994	3.9873
	58.5344	3.9864
	58.5694	3.9852
	58.6044	3.9905
	58.6394	3.9849
	58.6744	3.9864
	58.7094	3.9848
	58.7444	3.9934
	58.7804	3.9872
	58.8164	3.9901
	58.8514	3.9953
	58.8864	3.9972
	58.9214	3.9928
	58.9564	3.9953
	58.9914	3.9964
	59.0264	3.9929
	59.0614	4.0027
	59.0964	3.9981
	59.1314	3.9968
	59.1664	4.0057
	59.2014	3.9954
	59.2364	4.0008
	59.2714	3.9981
	59.3064	3.9975
	59.3414	3.9999
	59.3764	3.9989
	59.4114	3.9954
	59.4464	3.9922
	59.4814	3.9914
	59.5164	3.9945
	59.5514	3.9896
	59.5864	3.988
	59.6214	3.9909
	59.6564	3.9953
	59.6914	3.9936
	59.7274	3.991
	59.7624	3.9874
	59.7974	3.9944
	59.8324	3.9905
	59.8674	3.9959
	59.9024	3.9866
	59.9364	3.9882
	59.9714	3.991
	60.0064	3.9814
	60.0424	3.9835
	60.0775	3.9863
	60.1135	3.9869
	60.1475	3.9836
	60.1815	3.9834
	60.2165	3.9834
	60.2515	3.9843
	60.2865	3.9871
	60.3215	3.9839
	60.3565	3.9819
	60.3915	3.9863
	60.4265	3.985
	60.4615	3.9831
	60.4965	3.9855
	60.5315	3.9868
	60.5655	3.9884
	60.6005	3.9842
	60.6355	3.9896
	60.6705	3.9867
	60.7055	3.9841
	60.7415	3.9875
	60.7775	3.9952
	60.8115	3.9896
	60.8465	3.9871
	60.8815	3.9967
	60.9165	3.9949
	60.9515	3.9934
	60.9855	3.9885
	61.0205	3.9929
	61.0565	3.9848
	61.0915	3.9881
	61.1265	3.986
	61.1615	3.984
	61.1965	3.9832
	61.2315	3.9802
	61.2665	3.9793
	61.3015	3.9891
	61.3365	3.9854
	61.3725	3.9855
	61.4075	3.9817
	61.4425	3.9883
	61.4775	3.9821
	61.5125	3.98
	61.5475	3.9791
	61.5825	3.9822
	61.6175	3.9802
	61.6525	3.9823
	61.6885	3.9856
	61.7235	3.982
	61.7585	3.9816
	61.7935	3.9839
	61.8276	3.9749
	61.8626	3.9821
	61.8976	3.9728
	61.9326	3.978
	61.9676	3.9778
	62.0026	3.9816
	62.0386	3.9752
	62.0726	3.9833
	62.1076	3.9807
	62.1426	3.9795
	62.1776	3.9788
	62.2126	3.9866
	62.2476	3.9855
	62.2826	3.9808
	62.3176	3.9814
	62.3536	3.9875
	62.3886	3.9857
	62.4236	3.9811
	62.4586	3.9806
	62.4936	3.9873
	62.5286	3.9835
	62.5636	3.9792
	62.5986	3.986
	62.6336	3.9844
	62.6696	3.9804
	62.7046	3.9849
	62.7396	3.9854
	62.7746	3.9761
	62.8096	3.985
	62.8446	3.9822
	62.8796	3.9798
	62.9146	3.9803
	62.9496	3.9829
	62.9846	3.9825
	63.0196	3.9889
	63.0556	3.9885
	63.0906	3.9847
	63.1256	3.9853
	63.1606	3.9847
	63.1956	3.979
	63.2306	3.9862
	63.2656	3.9847
	63.3016	3.98
	63.3376	3.9843
	63.3726	3.9838
	63.4076	3.9872
	63.4426	3.9843
	63.4776	3.9835
	63.5126	3.9865
	63.5476	3.9868
	63.5827	3.9879
	63.6177	3.984
	63.6527	3.9878
	63.6877	3.9835
	63.7227	3.9817
	63.7577	3.9853
	63.7927	3.9819
	63.8277	3.978
	63.8627	3.9828
	63.8977	3.985
	63.9337	3.9816
	63.9697	3.9876
	64.0047	3.9807
	64.0387	3.9869
	64.0737	3.9816
	64.1087	3.9822
	64.1437	3.9845
	64.1787	3.9784
	64.2137	3.9794
	64.2497	3.9751
	64.2837	3.9835
	64.3187	3.9779
	64.3537	3.9797
	64.3887	3.9769
	64.4237	3.973
	64.4587	3.9782
	64.4937	3.9761
	64.5287	3.9743
	64.5627	3.9787
	64.5987	3.9765
	64.6347	3.9701
	64.6697	3.9705
	64.7047	3.9687
	64.7397	3.9737
	64.7757	3.9751
	64.8107	3.9716
	64.8447	3.9744
	64.8797	3.9751
	64.9147	3.9742
	64.9507	3.9745
	64.9867	3.9767
	65.0217	3.9775
	65.0557	3.9828
	65.0907	3.9805
	65.1257	3.9832
	65.1607	3.9808
	65.1957	3.9838
	65.2307	3.9837
	65.2657	3.9887
	65.3007	3.9866
	65.3358	3.9833
	65.3708	3.9894
	65.4058	3.9868
	65.4408	3.9861
	65.4748	3.9883
	65.5098	3.9848
	65.5458	3.9916
	65.5808	3.9855
	65.6168	3.9887
	65.6508	3.9845
	65.6858	3.9827
	65.7208	3.9849
	65.7558	3.9861
	65.7908	3.9814
	65.8258	3.9886
	65.8618	3.9851
	65.8968	3.9829
	65.9318	3.9854
	65.9668	3.9832
	66.0018	3.9808
	66.0368	3.9841
	66.0718	3.9816
	66.1068	3.9835
	66.1418	3.978
	66.1768	3.9844
	66.2118	3.9832
	66.2478	3.9818
	66.2828	3.9808
	66.3178	3.9819
	66.3528	3.9786
	66.3878	3.9829
	66.4228	3.9822
	66.4578	3.9778
	66.4938	3.9779
	66.5288	3.9778
	66.5638	3.9791
	66.5988	3.9802
	66.6338	3.9781
	66.6688	3.9764
	66.7038	3.972
	66.7388	3.9757
	66.7738	3.972
	66.8088	3.9748
	66.8438	3.9743
	66.8788	3.9815
	66.9138	3.9721
	66.9488	3.9718
	66.9828	3.973
	67.0178	3.9733
	67.0528	3.9669
	67.0879	3.9706
	67.1229	3.965
	67.1589	3.9728
	67.1939	3.9687
	67.2289	3.9691
	67.2639	3.9712
	67.2989	3.9708
	67.3339	3.972
	67.3679	3.9732
	67.4029	3.9729
	67.4379	3.9694
	67.4739	3.9766
	67.5089	3.972
	67.5449	3.9658
	67.5789	3.9711
	67.6139	3.9775
	67.6479	3.9718
	67.6829	3.9756
	67.7179	3.9694
	67.7519	3.9732
	67.7869	3.97
	67.8209	3.9749
	67.8569	3.9747
	67.8919	3.9672
	67.9269	3.9659
	67.9619	3.9686
	67.9969	3.9637
	68.0319	3.9633
	68.0669	3.965
	68.1029	3.9539
	68.1369	3.9611
	68.1729	3.9613
	68.2079	3.9617
	68.2439	3.9673
	68.2799	3.971
	68.3139	3.966
	68.3489	3.9694
	68.3839	3.9674
	68.4189	3.9691
	68.4539	3.9706
	68.4889	3.9675
	68.5239	3.9706
	68.5589	3.9751
	68.5939	3.9697
	68.6289	3.9652
	68.6639	3.9611
	68.6989	3.9633
	68.7339	3.967
	68.7689	3.9647
	68.8049	3.9669
	68.84	3.9672
	68.876	3.9695
	68.91	3.9662
	68.945	3.9694
	68.98	3.9655
	69.015	3.9641
	69.05	3.9591
	69.085	3.9687
	69.121	3.9643
	69.155	3.9661
	69.191	3.9612
	69.225	3.9635
	69.26	3.967
	69.295	3.9625
	69.33	3.9612
	69.365	3.9692
	69.4	3.96
	69.435	3.9634
	69.47	3.9712
	69.506	3.9659
	69.541	3.9603
	69.575	3.9646
	69.61	3.9689
	69.645	3.9627
	69.68	3.9644
	69.715	3.9665
	69.75	3.9706
	69.786	3.9713
	69.822	3.9726
	69.857	3.9655
	69.892	3.9728
	69.927	3.9623
	69.962	3.9701
[truncated: 8,401 more rows]

## Sheet: Fig 3C
		no incubation with RecX			30 s incubation with 500 nM RecX			100 s incubation with 500 nM RecX			200 s incubation with 500 nM RecX
	Time, s	Extension L/L0		Time, s	Extension L/L0		Time, s	Extension L/L0		Time, s	Extension L/L0
	0	1		0	1		0	1		0	1
	0.035	0.99916		0.035	1.00419		0.036	1.00107		0.035	0.99735
	0.071	0.99876		0.07	1.00336		0.072	0.99967		0.07	0.99942
	0.105	0.9998		0.105	1.00457		0.106	1.00231		0.105	0.99852
	0.14	0.9993		0.14	1.0057		0.141	1.00565		0.141	0.99895
	0.175	0.99992		0.175	1.00777		0.177	1.00395		0.177	1.0002
	0.209	1.00132		0.211	1.0051		0.213	1.0025		0.212	0.99892
	0.244	1.00008		0.245	1.00802		0.249	1.00434		0.247	1.00026
	0.279	1.0023		0.279	1.00896		0.284	1.00228		0.282	1.00044
	0.314	1.00435		0.314	1.00792		0.319	1.00662		0.318	0.99788
	0.35	1.00949		0.349	1.00916		0.354	1.00464		0.352	1.00468
	0.386	1.01797		0.384	1.00858		0.389	1.00736		0.387	1.00145
	0.421	1.0237		0.419	1.00961		0.424	1.00736		0.423	1.00017
	0.456	1.02853		0.454	1.00588		0.459	1.00494		0.458	0.99878
	0.491	1.03443		0.49	1.01027		0.494	1.00656		0.494	0.99956
	0.5261	1.04165		0.524	1.01075		0.53	1.00813		0.529	1.00375
	0.5621	1.04738		0.56	1.01464		0.566	1.00714		0.564	1.00227
	0.5991	1.05319		0.594	1.01241		0.601	1.00873		0.6	1.00015
	0.6351	1.05342		0.629	1.0136		0.635	1.00917		0.634	1.00294
	0.6691	1.05873		0.664	1.01443		0.67	1.00749		0.669	1.00346
	0.7041	1.06297		0.7	1.01458		0.705	1.00939		0.704	1.00392
	0.7411	1.06701		0.736	1.01681		0.74	1.00975		0.741	1.00346
	0.7771	1.06999		0.772	1.01713		0.775	1.00752		0.777	1.00372
	0.8131	1.07791		0.808	1.01802		0.81	1.00846		0.812	1.00334
	0.8491	1.08125		0.843	1.01794		0.845	1.00856		0.847	1.00448
	0.8851	1.0881		0.877	1.01827		0.881	1.00692		0.883	1.00547
	0.9201	1.09178		0.913	1.01935		0.917	1.01128		0.919	1.00776
	0.9551	1.09703		0.947	1.02208		0.951	1.00747		0.955	1.00581
	0.9901	1.10274		0.982	1.02347		0.986	1.01331		0.991	1.00468
	1.0251	1.10366		1.017	1.02435		1.021	1.00763		1.026	1.00564
	1.0601	1.10818		1.051	1.02728		1.055	1.00944		1.061	1.00788
	1.0961	1.11259		1.086	1.02564		1.09	1.01169		1.0961	1.00686
	1.1311	1.11307		1.122	1.02909		1.125	1.01139		1.1321	1.00788
	1.1671	1.11877		1.158	1.02831		1.16	1.01241		1.1661	1.01073
	1.2021	1.12214		1.193	1.02909		1.197	1.01661		1.2021	1.0123
	1.2371	1.1265		1.228	1.03056		1.233	1.0148		1.2361	1.00919
	1.2721	1.13329		1.263	1.03051		1.268	1.01502		1.2731	1.01131
	1.3071	1.13967		1.298	1.03235		1.303	1.01386		1.3091	1.01023
	1.3431	1.14121		1.334	1.03066		1.339	1.01694		1.3451	1.0125
	1.3771	1.14733		1.368	1.03247		1.374	1.01787		1.3801	1.01669
	1.4131	1.15525		1.403	1.03417		1.4091	1.0176		1.4151	1.0157
	1.4481	1.1566		1.439	1.03507		1.4461	1.02322		1.4511	1.0166
	1.4841	1.15736		1.473	1.03558		1.4821	1.02193		1.4861	1.01861
	1.5181	1.16295		1.508	1.03805		1.5171	1.02059		1.5221	1.01329
	1.5531	1.16823		1.543	1.03972		1.5521	1.02059		1.5581	1.01797
	1.5881	1.17135		1.578	1.0405		1.5871	1.02281		1.5931	1.01765
	1.6221	1.16882		1.6131	1.03989		1.6211	1.02314		1.6291	1.01567
	1.6571	1.17671		1.6481	1.04138		1.6561	1.01938		1.6651	1.01259
	1.6921	1.17814		1.6821	1.04151		1.6911	1.02539		1.7001	1.0164
	1.7271	1.18146		1.7171	1.04093		1.7271	1.02775		1.7351	1.01765
	1.7631	1.18132		1.7531	1.04133		1.7621	1.02781		1.7711	1.01802
	1.7981	1.18741		1.7881	1.04459		1.7981	1.02418		1.8071	1.01677
	1.8331	1.18573		1.8241	1.049		1.8321	1.03044		1.8421	1.01843
	1.8681	1.19441		1.8591	1.04918		1.8671	1.02946		1.8781	1.02102
	1.9031	1.19188		1.8941	1.05142		1.9021	1.02902		1.9141	1.01791
	1.9381	1.19452		1.9291	1.04941		1.9371	1.02712		1.9481	1.01616
	1.9731	1.19359		1.9641	1.05551		1.9721	1.03042		1.9831	1.01797
	2.0081	1.19747		1.9991	1.05253		2.0071	1.02978		2.0181	1.01881
	2.0431	1.20078		2.0351	1.05483		2.0421	1.03344		2.0541	1.01782
	2.0791	1.20435		2.0701	1.05496		2.0781	1.03075		2.0901	1.01933
	2.1151	1.20499		2.1041	1.0572		2.1141	1.03624		2.1251	1.01762
	2.1501	1.21013		2.1391	1.05907		2.1491	1.03942		2.1601	1.01677
	2.1851	1.20994		2.1741	1.06013		2.1841	1.03538		2.1961	1.02082
	2.2201	1.21078		2.2091	1.06013		2.2191	1.03725		2.2311	1.01794
	2.2551	1.21519		2.2431	1.06268		2.2541	1.04074		2.2651	1.01858
	2.2902	1.21892		2.2791	1.06265		2.2891	1.03772		2.3001	1.01759
	2.3252	1.22252		2.3131	1.06626		2.3241	1.03742		2.3351	1.02346
	2.3612	1.22159		2.3481	1.06548		2.3601	1.03769		2.3701	1.02009
	2.3972	1.2217		2.3841	1.06929		2.3961	1.03917		2.4061	1.02055
	2.4312	1.22117		2.4191	1.06916		2.4311	1.03596		2.4411	1.01811
	2.4662	1.22117		2.4551	1.0707		2.4661	1.04214		2.4761	1.02026
	2.5012	1.22833		2.4891	1.07212		2.5011	1.0442		2.5111	1.02221
	2.5362	1.22516		2.5241	1.07517		2.5361	1.04011		2.5461	1.0248
	2.5712	1.23013		2.5601	1.07688		2.5711	1.04354		2.5811	1.0225
	2.6062	1.2292		2.5951	1.07714		2.6061	1.03937		2.6171	1.02189
	2.6412	1.22903		2.6301	1.07842		2.6421	1.04464		2.6531	1.0255
	2.6772	1.2308		2.6651	1.07716		2.6771	1.04477		2.6881	1.02608
	2.7122	1.2321		2.7001	1.08264		2.7131	1.04376		2.7231	1.02677
	2.7472	1.23061		2.7351	1.0811		2.7481	1.04672		2.7581	1.02744
	2.7822	1.23086		2.7701	1.08279		2.7831	1.04694		2.7931	1.03157
	2.8172	1.2351		2.8051	1.08561		2.8181	1.04856		2.8291	1.03079
	2.8522	1.23415		2.8401	1.08561		2.8531	1.04991		2.8632	1.03445
	2.8872	1.23474		2.8751	1.08723		2.8891	1.0515		2.8992	1.03454
	2.9222	1.23749		2.9101	1.09142		2.9241	1.05142		2.9362	1.03451
	2.9572	1.23524		2.9451	1.09301		2.9601	1.05098		2.9722	1.03509
	2.9932	1.23485		2.9801	1.09061		2.9951	1.05466		3.0072	1.03387
	3.0292	1.23639		3.0161	1.09435		3.0301	1.05545		3.0422	1.03387
	3.0642	1.2376		3.0521	1.0949		3.0651	1.05721		3.0772	1.03582
	3.0992	1.23631		3.0871	1.09528		3.1001	1.05608		3.1122	1.03965
	3.1342	1.24122		3.1211	1.09586		3.1351	1.05913		3.1472	1.03744
	3.1702	1.23766		3.1561	1.09747		3.1702	1.0621		3.1832	1.04012
	3.2042	1.24195		3.1901	1.09975		3.2052	1.06366		3.2182	1.04212
	3.2392	1.24103		3.2251	1.09927		3.2412	1.06163		3.2542	1.04439
	3.2752	1.24159		3.2601	1.10108		3.2762	1.06245		3.2902	1.04576
	3.3102	1.24058		3.2951	1.10345		3.3122	1.06242		3.3252	1.04553
	3.3462	1.23943		3.3301	1.10525		3.3462	1.06695		3.3612	1.04297
	3.3802	1.24159		3.3661	1.10409		3.3812	1.0644		3.3952	1.04297
	3.4152	1.24058		3.4002	1.10835		3.4162	1.06646		3.4302	1.04399
	3.4502	1.24094		3.4352	1.1082		3.4512	1.06899		3.4662	1.04492
	3.4852	1.23827		3.4702	1.1086		3.4862	1.06791		3.5012	1.04622
	3.5202	1.24246		3.5052	1.1108		3.5212	1.0664		3.5372	1.04774
	3.5552	1.23988		3.5402	1.10976		3.5572	1.07146		3.5732	1.04806
	3.5912	1.24782		3.5752	1.11229		3.5932	1.07313		3.6072	1.05012
	3.6262	1.24625		3.6102	1.11171		3.6282	1.07406		3.6432	1.04791
	3.6622	1.24633		3.6452	1.11085		3.6632	1.0756		3.6772	1.05364
	3.6972	1.24572		3.6812	1.10918		3.6972	1.07434		3.7122	1.05204
	3.7322	1.24479		3.7162	1.11107		3.7322	1.07881		3.7482	1.05271
	3.7672	1.24513		3.7522	1.11335		3.7672	1.07546		3.7832	1.05143
	3.8022	1.24833		3.7862	1.1112		3.8022	1.07777		3.8192	1.05134
	3.8372	1.24403		3.8212	1.11476		3.8372	1.07719		3.8542	1.05265
	3.8712	1.2483		3.8562	1.11529		3.8732	1.07799		3.8892	1.05457
	3.9072	1.24361		3.8912	1.11347		3.9082	1.07736		3.9242	1.05724
	3.9422	1.24316		3.9262	1.1142		3.9432	1.08112		3.9592	1.05776
	3.9782	1.24799		3.9612	1.11885		3.9782	1.08315		3.9952	1.05367
	4.0122	1.2474		3.9972	1.11647		4.0132	1.08321		4.0312	1.05614
	4.0473	1.24757		4.0332	1.11925		4.0482	1.08502		4.0672	1.05454
	4.0823	1.24951		4.0672	1.12064		4.0822	1.08461		4.1022	1.05666
	4.1173	1.24897		4.1022	1.12054		4.1172	1.08378		4.1372	1.0546
	4.1523	1.24886		4.1372	1.12301		4.1522	1.08351		4.1722	1.05808
	4.1873	1.24611		4.1722	1.12528		4.1882	1.08362		4.2072	1.05582
	4.2233	1.2444		4.2072	1.12768		4.2232	1.08321		4.2422	1.06105
	4.2583	1.24639		4.2422	1.13154		4.2582	1.08535		4.2772	1.05904
	4.2933	1.24678		4.2772	1.12967		4.2932	1.0857		4.3122	1.05823
	4.3283	1.24729		4.3122	1.12801		4.3282	1.08804		4.3482	1.06021
	4.3633	1.24743		4.3472	1.13129		4.3632	1.08828		4.3842	1.06303
	4.3993	1.24589		4.3822	1.13313		4.3982	1.08815		4.4192	1.06393
	4.4333	1.24749		4.4172	1.13426		4.4332	1.08546		4.4542	1.06503
	4.4683	1.24729		4.4522	1.13585		4.4682	1.08719		4.4902	1.06343
	4.5033	1.24246		4.4882	1.13464		4.5042	1.08675		4.5252	1.06646
	4.5393	1.24423		4.5232	1.13906		4.5392	1.08705		4.5612	1.06753
	4.5743	1.2449		4.5582	1.1413		4.5752	1.08977		4.5953	1.06684
	4.6093	1.24737		4.5932	1.13918		4.6102	1.08979		4.6313	1.06431
	4.6443	1.24476		4.6292	1.14181		4.6452	1.08941		4.6673	1.06564
	4.6793	1.24552		4.6632	1.14206		4.6802	1.09301		4.7023	1.06326
	4.7143	1.24861		4.6992	1.14587		4.7152	1.09364		4.7373	1.06378
	4.7493	1.24712		4.7342	1.14794		4.7502	1.09221		4.7723	1.06489
	4.7843	1.2465		4.7692	1.14799		4.7852	1.09111		4.8073	1.0664
	4.8193	1.24648		4.8042	1.14605		4.8212	1.09172		4.8433	1.06756
	4.8553	1.24976		4.8392	1.14665		4.8572	1.09257		4.8793	1.0691
	4.8913	1.24844		4.8742	1.14963		4.8923	1.08897		4.9153	1.06788
	4.9263	1.25041		4.9092	1.146		4.9273	1.09465		4.9513	1.07024
	4.9613	1.24875		4.9442	1.15039		4.9623	1.09413		4.9853	1.06846
	4.9963	1.24782		4.9792	1.14822		4.9973	1.09523		5.0213	1.07061
	5.0313	1.24802		5.0142	1.15203		5.0313	1.0949		5.0573	1.07123
	5.0663	1.2476		5.0492	1.15382		5.0673	1.096		5.0923	1.07123
	5.1013	1.24895		5.0842	1.15147		5.1013	1.09372		5.1263	1.07239
	5.1373	1.24993		5.1193	1.15021		5.1373	1.09372		5.1633	1.07436
	5.1723	1.24867		5.1543	1.15637		5.1733	1.0985		5.1993	1.0746
	5.2083	1.24816		5.1893	1.15521		5.2073	1.09707		5.2343	1.07634
	5.2433	1.25049		5.2243	1.15627		5.2423	1.09828		5.2693	1.07707
	5.2783	1.25091		5.2603	1.15788		5.2773	1.09517		5.3043	1.07614
	5.3133	1.24664		5.2953	1.15624		5.3123	1.10283		5.3393	1.07518
	5.3483	1.24858		5.3303	1.15682		5.3473	1.10198		5.3743	1.07634
	5.3823	1.25001		5.3653	1.15864		5.3823	1.10253		5.4093	1.07963
	5.4173	1.24917		5.3993	1.16013		5.4173	1.10588		5.4463	1.08271
	5.4533	1.2467		5.4343	1.16151		5.4533	1.10363		5.4803	1.07716
	5.4883	1.2442		5.4693	1.16134		5.4873	1.10747		5.5163	1.07922
	5.5243	1.24558		5.5043	1.16245		5.5233	1.10948		5.5503	1.0821
	5.5583	1.24395		5.5393	1.16182		5.5573	1.10827		5.5853	1.08076
	5.5933	1.24448		5.5743	1.16578		5.5923	1.11066		5.6203	1.0846
	5.6273	1.24858		5.6093	1.16535		5.6273	1.11019		5.6553	1.08515
	5.6623	1.24819		5.6443	1.16553		5.6623	1.11376		5.6913	1.08439
	5.6973	1.24313		5.6803	1.16575		5.6973	1.1114		5.7253	1.08297
	5.7323	1.24549		5.7153	1.16951		5.7323	1.11263		5.7613	1.08114
	5.7684	1.2451		5.7503	1.16656		5.7693	1.11414		5.7973	1.08596
	5.8034	1.2442		5.7853	1.16719		5.8033	1.1103		5.8323	1.08672
	5.8394	1.24822		5.8203	1.16906		5.8393	1.11368		5.8673	1.08655
	5.8744	1.24625		5.8553	1.16989		5.8733	1.11516		5.9023	1.08489
	5.9084	1.24648		5.8903	1.17239		5.9083	1.11746		5.9373	1.08259
	5.9434	1.24701		5.9263	1.17262		5.9433	1.11549		5.9723	1.08562
	5.9784	1.24796		5.9613	1.17267		5.9783	1.11919		6.0073	1.08748
	6.0134	1.25072		5.9963	1.17176		6.0133	1.11933		6.0433	1.0864
	6.0494	1.24833		6.0313	1.17337		6.0483	1.12013		6.0783	1.08695
	6.0844	1.24763		6.0663	1.17572		6.0843	1.12007		6.1143	1.08896
	6.1204	1.24751		6.1013	1.1784		6.1193	1.12059		6.1493	1.08817
	6.1554	1.25046		6.1363	1.17734		6.1543	1.12128		6.1843	1.09213
	6.1904	1.24799		6.1713	1.18034		6.1893	1.12359		6.2193	1.09059
	6.2254	1.2485		6.2063	1.18117		6.2243	1.12271		6.2553	1.09163
	6.2594	1.24544		6.2413	1.1813		6.2593	1.12463		6.2893	1.09326
	6.2944	1.24912		6.2763	1.17923		6.2943	1.12468		6.3253	1.09445
	6.3294	1.25181		6.3113	1.18069		6.3293	1.12455		6.3614	1.09102
	6.3644	1.25139		6.3463	1.18405		6.3643	1.12545		6.3964	1.09803
	6.4014	1.25293		6.3813	1.17895		6.4003	1.12715		6.4324	1.09457
	6.4374	1.25299		6.4163	1.18445		6.4353	1.12446		6.4664	1.09756
	6.4734	1.25215		6.4513	1.18369		6.4703	1.12699		6.5024	1.09783
	6.5074	1.25204		6.4863	1.18236		6.5053	1.1279		6.5364	1.10047
	6.5434	1.25201		6.5213	1.18539		6.5403	1.12976		6.5724	1.09838
	6.5774	1.24979		6.5573	1.18493		6.5753	1.12913		6.6064	1.09756
	6.6124	1.25097		6.5923	1.18713		6.6093	1.13072		6.6434	1.10451
	6.6484	1.24881		6.6273	1.18511		6.6444	1.13218		6.6794	1.10158
	6.6844	1.25044		6.6623	1.18791		6.6794	1.13306		6.7144	1.10483
	6.7204	1.24813		6.6973	1.19003		6.7154	1.13558		6.7504	1.10315
	6.7554	1.24867		6.7323	1.18745		6.7504	1.13635		6.7854	1.10262
	6.7894	1.25001		6.7673	1.18952		6.7864	1.13679		6.8204	1.10617
	6.8244	1.2501		6.8023	1.19111		6.8204	1.13536		6.8554	1.10748
	6.8594	1.24945		6.8373	1.19225		6.8554	1.13805		6.8924	1.10547
	6.8954	1.24985		6.8734	1.19364		6.8904	1.138		6.9284	1.1082
	6.9304	1.24914		6.9084	1.19099		6.9254	1.13984		6.9634	1.10341
	6.9664	1.25041		6.9444	1.19255		6.9604	1.14299		6.9984	1.10637
	7.0014	1.25013		6.9794	1.19111		6.9954	1.14239		7.0334	1.10515
	7.0374	1.24749		7.0144	1.19182		7.0314	1.14198		7.0694	1.10527
	7.0714	1.24839		7.0494	1.19167		7.0664	1.14143		7.1044	1.1069
	7.1064	1.24311		7.0844	1.19328		7.1024	1.14077		7.1384	1.10829
	7.1414	1.24622		7.1194	1.1925		7.1374	1.14099		7.1754	1.10972
	7.1764	1.24805		7.1544	1.19293		7.1724	1.14091		7.2114	1.10803
	7.2114	1.2458		7.1894	1.19495		7.2074	1.14179		7.2474	1.1062
	7.2464	1.24833		7.2244	1.19558		7.2424	1.14588		7.2814	1.10876
	7.2824	1.24959		7.2604	1.19634		7.2774	1.14349		7.3174	1.11099
	7.3184	1.24648		7.2944	1.19689		7.3124	1.14489		7.3524	1.10797
	7.3534	1.24889		7.3294	1.19984		7.3484	1.14547		7.3884	1.10896
	7.3874	1.24808		7.3644	1.20022		7.3844	1.14541		7.4244	1.1137
	7.4224	1.25103		7.3994	1.20254		7.4194	1.14607		7.4594	1.11288
	7.4574	1.24895		7.4344	1.19999		7.4544	1.14939		7.4954	1.11341
	7.4924	1.24681		7.4694	1.2005		7.4894	1.14747		7.5314	1.11506
	7.5275	1.2492		7.5054	1.19813		7.5254	1.1529		7.5664	1.11477
	7.5625	1.24917		7.5404	1.20103		7.5594	1.15203		7.6014	1.11413
	7.5985	1.24549		7.5754	1.20254		7.5944	1.15024		7.6364	1.11411
	7.6335	1.24673		7.6104	1.20269		7.6304	1.15128		7.6724	1.11518
	7.6685	1.24676		7.6454	1.19992		7.6654	1.15387		7.7074	1.11666
	7.7035	1.24926		7.6804	1.20126		7.7014	1.15315		7.7434	1.12105
	7.7385	1.2506		7.7154	1.20302		7.7364	1.15557		7.7774	1.11454
	7.7735	1.24853		7.7504	1.20272		7.7714	1.15414		7.8124	1.11844
	7.8085	1.24712		7.7854	1.20333		7.8064	1.15793		7.8474	1.12082
	7.8435	1.24631		7.8204	1.20408		7.8414	1.15971		7.8824	1.11844
	7.8785	1.24718		7.8554	1.2055		7.8764	1.15763		7.9184	1.11887
	7.9145	1.24844		7.8914	1.20555		7.9124	1.15812		7.9534	1.11922
	7.9495	1.24867		7.9264	1.20254		7.9474	1.1587		7.9884	1.11777
	7.9845	1.25029		7.9614	1.20756		7.9834	1.1582		8.0244	1.12021
	8.0205	1.24926		7.9954	1.20651		8.0174	1.15963		8.0594	1.11771
	8.0545	1.24999		8.0294	1.20494		8.0524	1.15845		8.0955	1.11858
	8.0895	1.25069		8.0644	1.20885		8.0874	1.16098		8.1295	1.12181
	8.1245	1.25167		8.0994	1.20893		8.1224	1.16081		8.1645	1.1221
	8.1605	1.25004		8.1344	1.21034		8.1574	1.16172		8.1995	1.12085
	8.1965	1.24782		8.1704	1.20973		8.1924	1.16169		8.2345	1.11823
	8.2315	1.24945		8.2054	1.20774		8.2284	1.1652		8.2695	1.11852
	8.2675	1.24867		8.2404	1.21044		8.2644	1.16383		8.3055	1.11983
	8.3025	1.24678		8.2744	1.21021		8.2994	1.16194		8.3415	1.12085
	8.3375	1.24841		8.3094	1.21001		8.3344	1.16487		8.3765	1.12097
	8.3715	1.24883		8.3434	1.2091		8.3694	1.16408		8.4115	1.12068
	8.4065	1.24971		8.3784	1.20926		8.4045	1.16622		8.4475	1.12207
	8.4415	1.24751		8.4134	1.20918		8.4395	1.16581		8.4815	1.12411
	8.4765	1.24676		8.4484	1.21168		8.4745	1.16844		8.5165	1.1237
	8.5125	1.24721		8.4834	1.20923		8.5095	1.16822		8.5515	1.12332
	8.5475	1.24816		8.5194	1.21069		8.5455	1.1699		8.5875	1.12591
	8.5835	1.24448		8.5544	1.21054		8.5805	1.16932		8.6225	1.12451
	8.6175	1.24403		8.5904	1.21233		8.6155	1.17226		8.6585	1.12742
	8.6525	1.24611		8.6245	1.2112		8.6505	1.17141		8.6945	1.12629
	8.6875	1.24597		8.6595	1.21095		8.6855	1.17171		8.7285	1.12963
	8.7225	1.24457		8.6945	1.21044		8.7205	1.1716		8.7635	1.12983
	8.7575	1.24636		8.7295	1.211		8.7555	1.17714		8.7985	1.13088
	8.7925	1.24692		8.7645	1.21299		8.7905	1.17769		8.8345	1.13196
	8.8285	1.2474		8.7995	1.21334		8.8255	1.17819		8.8695	1.1314
	8.8635	1.24715		8.8355	1.2113		8.8615	1.17605		8.9055	1.13132
	8.8995	1.24605		8.8705	1.21372		8.8975	1.17646		8.9415	1.13117
	8.9345	1.24499		8.9055	1.2143		8.9325	1.17432		8.9755	1.13082
	8.9685	1.24875		8.9405	1.21556		8.9675	1.17552		9.0115	1.13172
	9.0035	1.24867		8.9765	1.21571		9.0025	1.17613		9.0465	1.13338
	9.0385	1.24594		9.0115	1.21468		9.0375	1.17717		9.0815	1.13103
	9.0735	1.24493		9.0465	1.21428		9.0725	1.17802		9.1165	1.13085
	9.1085	1.24732		9.0815	1.21418		9.1075	1.17843		9.1535	1.13242
	9.1445	1.24412		9.1165	1.21708		9.1435	1.17939		9.1895	1.13306
	9.1795	1.2474		9.1525	1.21476		9.1785	1.17978		9.2245	1.13443
	9.2145	1.24336		9.1865	1.21387		9.2135	1.17898		9.2595	1.13321
	9.2495	1.24409		9.2215	1.21746		9.2495	1.17885		9.2945	1.13466
	9.2846	1.24375		9.2565	1.2139		9.2835	1.18112		9.3295	1.13643
	9.3196	1.24308		9.2915	1.21549		9.3185	1.18313		9.3655	1.13797
	9.3546	1.24179		9.3265	1.2169		9.3535	1.18126		9.3995	1.13672
	9.3896	1.2424		9.3615	1.21854		9.3885	1.18209		9.4365	1.1385
	9.4246	1.24501		9.3965	1.21937		9.4225	1.18414		9.4705	1.13687
	9.4606	1.2451		9.4315	1.21761		9.4575	1.18126		9.5065	1.13954
	9.4956	1.24235		9.4675	1.21675		9.4935	1.18044		9.5415	1.13986
	9.5306	1.24386		9.5025	1.21566		9.5295	1.17907		9.5765	1.13951
	9.5656	1.24664		9.5375	1.2171		9.5645	1.18321		9.6115	1.14155
	9.6006	1.24667		9.5725	1.21574		9.5995	1.17896		9.6465	1.14414
	9.6356	1.24445		9.6075	1.21488		9.6345	1.18316		9.6815	1.13876
	9.6706	1.24597		9.6425	1.21965		9.6695	1.18368		9.7175	1.14152
	9.7056	1.24743		9.6775	1.219		9.7045	1.18338		9.7525	1.1426
	9.7406	1.24465		9.7125	1.22129		9.7395	1.18151		9.7885	1.14355
	9.7766	1.24721		9.7475	1.21894		9.7755	1.18225		9.8235	1.14155
	9.8116	1.24443		9.7835	1.21544		9.8105	1.17907		9.8586	1.14251
	9.8466	1.24872		9.8185	1.21912		9.8465	1.1809		9.8936	1.14158
	9.8816	1.2476		9.8535	1.22177		9.8805	1.18206		9.9296	1.13989
	9.9166	1.24232		9.8885	1.2219		9.9155	1.1795		9.9646	1.14132
	9.9516	1.24805		9.9225	1.22096		9.9505	1.182		10.0016	1.1419
	9.9866	1.2442		9.9575	1.22192		9.9855	1.18082		10.0356	1.14204
	10.0216	1.24594		9.9925	1.22079		10.0205	1.18211		10.0716	1.14501
	10.0576	1.24735		10.0275	1.22119		10.0555	1.17874		10.1066	1.14353
	10.0926	1.24709		10.0625	1.22074		10.0905	1.18335		10.1416	1.14114
	10.1286	1.24426		10.0975	1.22132		10.1265	1.18173		10.1766	1.14324
	10.1626	1.24664		10.1345	1.21748		10.1606	1.1814		10.2116	1.14239
	10.1976	1.24414		10.1695	1.22003		10.1956	1.18063		10.2466	1.14408
	10.2316	1.24558		10.2045	1.21975		10.2306	1.18074		10.2826	1.14568
	10.2666	1.24392		10.2385	1.22016		10.2656	1.1845		10.3186	1.14574
	10.3016	1.2451		10.2725	1.22154		10.3006	1.18299		10.3536	1.14611
	10.3366	1.24122		10.3075	1.21993		10.3366	1.18368		10.3886	1.1448
	10.3716	1.24232		10.3425	1.22185		10.3706	1.18338		10.4236	1.14469
	10.4066	1.24358		10.3776	1.2221		10.4066	1.18546		10.4586	1.14556
	10.4426	1.24372		10.4126	1.22132		10.4406	1.18579		10.4936	1.14928
	10.4786	1.24372		10.4476	1.21968		10.4756	1.18807		10.5286	1.14946
	10.5126	1.2449		10.4826	1.22238		10.5106	1.18563		10.5636	1.14911
	10.5476	1.24459		10.5176	1.22402		10.5466	1.18423		10.5996	1.14678
	10.5826	1.24139		10.5526	1.22132		10.5806	1.18549		10.6356	1.15047
	10.6176	1.24173		10.5866	1.22162		10.6156	1.18716		10.6706	1.14789
	10.6526	1.24083		10.6216	1.22245		10.6506	1.18736		10.7066	1.14664
	10.6876	1.23847		10.6566	1.22518		10.6856	1.18903		10.7406	1.15082
	10.7216	1.23976		10.6916	1.22533		10.7206	1.18736		10.7756	1.1503
	10.7576	1.24327		10.7266	1.22828		10.7566	1.1865		10.8106	1.15158
	10.7926	1.24313		10.7616	1.22611		10.7926	1.18656		10.8456	1.14847
	10.8276	1.24139		10.7976	1.22651		10.8276	1.18719		10.8826	1.14803
	10.8626	1.24504		10.8316	1.22422		10.8626	1.18939		10.9186	1.15036
	10.8976	1.24482		10.8666	1.2245		10.8976	1.19049		10.9536	1.14957
	10.9326	1.24406		10.9016	1.22838		10.9326	1.18911		10.9896	1.14995
	10.9676	1.246		10.9366	1.22662		10.9666	1.18793		11.0246	1.14943
	11.0026	1.24339		10.9716	1.228		11.0026	1.18865		11.0606	1.14917
	11.0377	1.24153		11.0066	1.22664		11.0366	1.18955		11.0956	1.14931
	11.0737	1.24201		11.0426	1.23156		11.0726	1.19098		11.1326	1.1503
	11.1087	1.24221		11.0766	1.22773		11.1076	1.1937		11.1686	1.14899
	11.1437	1.24271		11.1116	1.23022		11.1426	1.19164		11.2036	1.14966
	11.1787	1.24572		11.1466	1.23315		11.1776	1.19131		11.2386	1.14989
	11.2147	1.24603		11.1816	1.23234		11.2126	1.19386		11.2736	1.15039
	11.2487	1.24476		11.2166	1.23053		11.2476	1.18974		11.3086	1.15196
	11.2837	1.24069		11.2516	1.22962		11.2826	1.19329		11.3436	1.1553
	11.3187	1.24221		11.2866	1.22937		11.3176	1.19213		11.3786	1.15216
	11.3537	1.24476		11.3216	1.2299		11.3536	1.1909		11.4146	1.15344
	11.3897	1.24389		11.3566	1.23075		11.3886	1.18999		11.4506	1.15425
	11.4257	1.24266		11.3926	1.22863		11.4246	1.19425		11.4856	1.15478
	11.4607	1.24583		11.4266	1.23191		11.4596	1.19268		11.5216	1.15606
	11.4957	1.24507		11.4636	1.23363		11.4946	1.19219		11.5556	1.15451
	11.5307	1.24322		11.4976	1.23171		11.5296	1.19175		11.5917	1.15451
	11.5657	1.2442		11.5336	1.23247		11.5636	1.19304		11.6257	1.15853
	11.6007	1.24479		11.5686	1.23101		11.5986	1.19598		11.6607	1.15222
	11.6357	1.24746		11.6036	1.23108		11.6336	1.19416		11.6977	1.15367
	11.6717	1.24594		11.6386	1.23494		11.6686	1.19477		11.7327	1.15701
	11.7067	1.24527		11.6736	1.23562		11.7036	1.19545		11.7677	1.15489
	11.7427	1.24631		11.7076	1.23714		11.7386	1.19834		11.8027	1.15568
	11.7767	1.24316		11.7426	1.23525		11.7746	1.19633		11.8387	1.15507
	11.8117	1.24443		11.7796	1.2333		11.8096	1.19587		11.8727	1.15856
	11.8467	1.24723		11.8136	1.23706		11.8446	1.19943		11.9077	1.156
	11.8817	1.24631		11.8486	1.2358		11.8796	1.19869		11.9427	1.15559
	11.9167	1.24563		11.8836	1.23325		11.9147	1.20108		11.9787	1.15623
	11.9517	1.24816		11.9176	1.23494		11.9497	1.19952		12.0147	1.1567
	11.9877	1.24541		11.9526	1.23239		11.9857	1.20045		12.0507	1.15635
	12.0227	1.24617		11.9866	1.23242		12.0207	1.19927		12.0847	1.15815
	12.0577	1.2428		12.0216	1.23275		12.0567	1.19943		12.1197	1.15585
	12.0927	1.2453		12.0566	1.23595		12.0917	1.20248		12.1547	1.15934
	12.1277	1.24521		12.0916	1.23454		12.1257	1.20163		12.1897	1.16094
	12.1627	1.24757		12.1277	1.23358		12.1607	1.20199		12.2257	1.15858
	12.1977	1.24465		12.1627	1.23555		12.1957	1.20479		12.2627	1.15925
	12.2327	1.24591		12.1987	1.23522		12.2307	1.20358		12.2987	1.16207
	12.2677	1.24653		12.2327	1.23525		12.2657	1.20454		12.3337	1.16172
	12.3037	1.24729		12.2677	1.2358		12.3007	1.20341		12.3697	1.16021
	12.3387	1.24855		12.3027	1.23527		12.3367	1.20223		12.4047	1.1628
	12.3737	1.24692		12.3377	1.23464		12.3707	1.20498		12.4387	1.16085
	12.4087	1.24878		12.3727	1.23434		12.4067	1.20243		12.4737	1.16303
	12.4437	1.24572		12.4077	1.23338		12.4417	1.20402		12.5087	1.16289
	12.4787	1.24732		12.4427	1.2354		12.4767	1.20388		12.5457	1.16699
	12.5137	1.2469		12.4777	1.23373		12.5117	1.2055		12.5817	1.16417
	12.5487	1.24715		12.5127	1.23426		12.5467	1.20322		12.6167	1.16469
	12.5837	1.24931		12.5477	1.23325		12.5817	1.20405		12.6517	1.16597
	12.6197	1.24774		12.5827	1.23431		12.6167	1.20443		12.6867	1.16536
	12.6537	1.2483		12.6177	1.23583		12.6527	1.20454		12.7217	1.1639
	12.6897	1.2494		12.6527	1.2333		12.6877	1.20665		12.7567	1.16172
	12.7247	1.24723		12.6877	1.2326		12.7227	1.20869		12.7917	1.16504
	12.7597	1.2492		12.7227	1.23658		12.7577	1.20841		12.8267	1.1662
	12.7938	1.25159		12.7577	1.23764		12.7927	1.21072		12.8617	1.16202
	12.8288	1.24757		12.7937	1.23653		12.8277	1.2088		12.8977	1.16103
	12.8638	1.24926		12.8277	1.23651		12.8627	1.20882		12.9327	1.16306
	12.8988	1.24532		12.8627	1.23787		12.8977	1.21157		12.9687	1.16228
	12.9358	1.24788		12.8977	1.23585		12.9337	1.20893		13.0037	1.16556
	12.9698	1.25063		12.9327	1.2384		12.9687	1.20855		13.0387	1.16611
	13.0058	1.24673		12.9667	1.23842		13.0027	1.20805		13.0737	1.16481
	13.0408	1.24451		13.0017	1.23701		13.0377	1.20893		13.1077	1.16289
	13.0758	1.24611		13.0367	1.23643		13.0727	1.21146		13.1447	1.16611
	13.1108	1.24771		13.0717	1.23482		13.1077	1.21003		13.1797	1.16574
	13.1458	1.24586		13.1077	1.23681		13.1427	1.20882		13.2147	1.16393
	13.1808	1.24819		13.1427	1.23807		13.1777	1.20687		13.2497	1.166
	13.2158	1.24861		13.1787	1.23656		13.2127	1.21121		13.2847	1.16434
	13.2518	1.25083		13.2137	1.23827		13.2477	1.20712		13.3197	1.16626
	13.2878	1.25029		13.2487	1.23999		13.2837	1.21146		13.3548	1.16745
	13.3218	1.24942		13.2837	1.23641		13.3187	1.21371		13.3908	1.163
	13.3568	1.25013		13.3197	1.23974		13.3537	1.21319		13.4268	1.16399
	13.3918	1.2485		13.3537	1.23893		13.3887	1.21198		13.4618	1.16748
	13.4268	1.25035		13.3887	1.2384		13.4237	1.21129		13.4968	1.16556
	13.4618	1.2501		13.4247	1.23666		13.4587	1.21354		13.5318	1.16949
	13.4968	1.25091		13.4597	1.23926		13.4937	1.20998		13.5668	1.16518
	13.5318	1.25088		13.4947	1.24128		13.5287	1.21311		13.6028	1.16646
	13.5678	1.24808		13.5297	1.24012		13.5637	1.2128		13.6368	1.16382
	13.6038	1.25105		13.5647	1.23979		13.5997	1.21258		13.6718	1.16542
	13.6388	1.25164		13.5987	1.23921		13.6358	1.2164		13.7088	1.16568
	13.6738	1.25229		13.6337	1.23999		13.6708	1.21525		13.7448	1.16469
	13.7088	1.25392		13.6687	1.23943		13.7058	1.21195		13.7808	1.16603
	13.7438	1.25569		13.7037	1.23863		13.7408	1.21788		13.8158	1.16553
	13.7788	1.25091		13.7387	1.23802		13.7758	1.21486		13.8498	1.16585
	13.8148	1.25063		13.7747	1.238		13.8108	1.21541		13.8858	1.16661
	13.8498	1.25024		13.8097	1.23903		13.8458	1.21338		13.9208	1.16478
	13.8858	1.25229		13.8447	1.24062		13.8818	1.21459		13.9558	1.16466
	13.9198	1.25018		13.8798	1.23994		13.9168	1.21739		13.9918	1.16853
	13.9548	1.25015		13.9148	1.2412		13.9528	1.21731		14.0278	1.16408
	13.9898	1.2542		13.9498	1.24138		13.9868	1.21862		14.0638	1.16495
	14.0258	1.25136		13.9848	1.24251		14.0218	1.21744		14.0998	1.16629
	14.0598	1.25277		14.0198	1.23926		14.0568	1.21796		14.1348	1.16492
	14.0958	1.2549		14.0568	1.23996		14.0918	1.21972		14.1698	1.16603
	14.1298	1.25257		14.0928	1.23797		14.1268	1.21761		14.2038	1.16771
	14.1658	1.25195		14.1278	1.23641		14.1618	1.21936		14.2398	1.16899
	14.2008	1.25097		14.1628	1.23416		14.1978	1.21895		14.2758	1.16966
	14.2358	1.25316		14.1978	1.23691		14.2328	1.22148		14.3118	1.16908
	14.2708	1.25282		14.2318	1.23782		14.2688	1.2206		14.3458	1.16632
	14.3058	1.25364		14.2668	1.23921		14.3038	1.22175		14.3808	1.17158
	14.3408	1.25378		14.3018	1.23913		14.3388	1.22005		14.4158	1.17181
	14.3758	1.25265		14.3378	1.23747		14.3738	1.21931		14.4518	1.17303
	14.4108	1.25305		14.3728	1.24044		14.4088	1.21805		14.4858	1.16995
	14.4458	1.25209		14.4088	1.23752		14.4438	1.2164		14.5208	1.17111
	14.4818	1.25513		14.4428	1.24123		14.4788	1.22049		14.5568	1.16922
	14.5169	1.25451		14.4778	1.23769		14.5148	1.21975		14.5928	1.17126
	14.5519	1.2551		14.5128	1.23747		14.5508	1.21978		14.6268	1.17016
	14.5869	1.25361		14.5478	1.23603		14.5858	1.22205		14.6618	1.1701
	14.6219	1.25381		14.5828	1.24072		14.6208	1.22087		14.6968	1.17507
	14.6569	1.25614		14.6168	1.23966		14.6558	1.22104		14.7318	1.17315
	14.6919	1.25538		14.6518	1.2409		14.6908	1.22027		14.7668	1.16838
	14.7269	1.25181		14.6878	1.24203		14.7258	1.22337		14.8028	1.17204
	14.7619	1.25192		14.7228	1.24218		14.7608	1.22109		14.8368	1.17315
	14.7979	1.25367		14.7578	1.24087		14.7968	1.21983		14.8728	1.17626
	14.8339	1.25383		14.7928	1.23853		14.8318	1.22159		14.9088	1.17428
	14.8679	1.25499		14.8278	1.24115		14.8668	1.22271		14.9438	1.17588
	14.9029	1.25338		14.8628	1.24158		14.9018	1.22178		14.9788	1.17539
	14.9379	1.2551		14.8978	1.24059		14.9368	1.2223		15.0138	1.17396
	14.9729	1.25684		14.9328	1.23782		14.9718	1.21994		15.0498	1.17707
	15.0079	1.25299		14.9678	1.23961		15.0068	1.2212		15.0849	1.17527
	15.0429	1.25445		15.0028	1.23787		15.0418	1.22118		15.1199	1.17489
	15.0779	1.25476		15.0388	1.23928		15.0768	1.22252		15.1559	1.17707
	15.1139	1.25496		15.0738	1.23956		15.1128	1.22252		15.1919	1.17329
	15.1499	1.2551		15.1088	1.23805		15.1478	1.2209		15.2269	1.17472
	15.1849	1.24869		15.1438	1.23959		15.1828	1.21964		15.2619	1.17486
	15.2199	1.24704		15.1788	1.24246		15.2178	1.22071		15.2969	1.17713
	15.2549	1.25018		15.2138	1.2417		15.2528	1.22024		15.3319	1.17626
	15.2899	1.2485		15.2488	1.24115		15.2878	1.21936		15.3669	1.17606
	15.3249	1.25173		15.2838	1.24032		15.3228	1.22104		15.4029	1.17736
	15.3599	1.25119		15.3198	1.24085		15.3578	1.22046		15.4389	1.17731
	15.3959	1.25389		15.3548	1.24029		15.3939	1.22065		15.4729	1.17876
	15.4309	1.25392		15.3908	1.24032		15.4289	1.22046		15.5089	1.17824
	15.4669	1.25557		15.4248	1.24206		15.4629	1.22156		15.5439	1.17949
	15.5009	1.25732		15.4598	1.24022		15.4989	1.22068		15.5789	1.17658
	15.5359	1.25552		15.4948	1.24062		15.5349	1.21909		15.6149	1.17853
	15.5719	1.254		15.5298	1.24082		15.5689	1.22398		15.6489	1.17905
	15.6059	1.25566		15.5648	1.2414		15.6039	1.22109		15.6849	1.18219
	15.6409	1.25687		15.5998	1.23951		15.6389	1.22384		15.7219	1.18062
	15.6759	1.25701		15.6359	1.24213		15.6749	1.22233		15.7569	1.17902
	15.7119	1.25434		15.6709	1.2443		15.7099	1.22071		15.7919	1.18027
	15.7469	1.25487		15.7059	1.24506		15.7449	1.22192		15.8269	1.183
	15.7819	1.25406		15.7409	1.24405		15.7819	1.22079		15.8619	1.18394
	15.8179	1.25527		15.7759	1.24345		15.8169	1.2217		15.8969	1.18353
	15.8529	1.25473		15.8109	1.24216		15.8519	1.22323		15.9319	1.18167
	15.8889	1.25636		15.8459	1.24097		15.8869	1.22118		15.9669	1.1835
	15.9229	1.2565		15.8809	1.24254		15.9219	1.22178		16.0039	1.18379
	15.9579	1.25254		15.9159	1.24269		15.9569	1.21901		16.0399	1.18394
	15.9939	1.25392		15.9519	1.24236		15.9929	1.22027		16.0749	1.18303
	16.0289	1.25701		15.9869	1.24292		16.0279	1.22109		16.1099	1.18399
	16.0649	1.25718		16.0219	1.24176		16.0629	1.22101		16.1439	1.18277
	16.0999	1.25661		16.0569	1.24165		16.0979	1.22466		16.1789	1.18327
	16.1349	1.25468		16.0929	1.24133		16.1319	1.22271		16.2139	1.18484
	16.1699	1.2585		16.1269	1.24034		16.1669	1.22724		16.2489	1.18623
	16.2059	1.25616		16.1619	1.24191		16.2019	1.2251		16.2849	1.18585
	16.2399	1.25614		16.1969	1.24206		16.2379	1.22466		16.3199	1.18466
	16.275	1.25552		16.2319	1.24509		16.2719	1.22601		16.3559	1.18771
	16.311	1.25715		16.2679	1.24367		16.3079	1.22735		16.3899	1.18516
	16.347	1.25726		16.3019	1.24395		16.3429	1.22535		16.4259	1.18606
	16.382	1.25673		16.3369	1.24415		16.3789	1.22381		16.4599	1.18449
	16.417	1.25383		16.3719	1.24377		16.4139	1.22529		16.4949	1.18801
	16.453	1.25493		16.4069	1.24105		16.4489	1.22406		16.5309	1.18475
	16.487	1.2544		16.4419	1.24524		16.4839	1.2248		16.5659	1.18411
	16.522	1.25602		16.4769	1.24526		16.5189	1.22603		16.6009	1.18824
	16.557	1.25431		16.5119	1.24198		16.5539	1.2256		16.6359	1.18879
	16.594	1.25462		16.5469	1.24314		16.5889	1.22532		16.6719	1.18821
	16.63	1.2556		16.5809	1.24319		16.6249	1.22485		16.7069	1.18838
	16.665	1.2522		16.6169	1.24329		16.6599	1.224		16.7419	1.19213
	16.7	1.25145		16.6519	1.24319		16.6959	1.22628		16.7779	1.18856
	16.735	1.25251		16.6879	1.24387		16.7309	1.22409		16.8129	1.19306
	16.77	1.25257		16.7219	1.24236		16.7659	1.22277		16.848	1.19013
	16.805	1.25381		16.7569	1.24294		16.8009	1.22365		16.885	1.18969
	16.84	1.25687		16.7919	1.24196		16.8359	1.22291		16.921	1.18891
	16.876	1.25788		16.8269	1.24284		16.8709	1.22354		16.956	1.18981
	16.911	1.25232		16.8619	1.24256		16.9059	1.22612		16.991	1.19094
	16.947	1.25327		16.8969	1.23986		16.9419	1.2254		17.026	1.19146
	16.981	1.2526		16.9319	1.241		16.9779	1.22598		17.061	1.19129
	17.016	1.25428		16.9679	1.24077		17.0129	1.22422		17.097	1.18899
	17.051	1.25316		17.0029	1.24385		17.0479	1.22414		17.131	1.18844
	17.087	1.2601		17.0379	1.244		17.0829	1.22656		17.167	1.18626
	17.122	1.2544		17.0729	1.24183		17.1179	1.22194		17.203	1.18832
	17.157	1.2572		17.1079	1.24453		17.153	1.22282		17.238	1.1871
	17.192	1.25729		17.1429	1.24261		17.188	1.22282		17.273	1.18626
	17.228	1.25549		17.1779	1.23893		17.224	1.22436		17.308	1.19019
	17.263	1.25445		17.2129	1.24251		17.259	1.22689		17.344	1.18536
	17.298	1.25375		17.2489	1.23921		17.295	1.22433		17.378	1.18513
	17.333	1.25504		17.2829	1.24012		17.329	1.22425		17.413	1.18853
	17.368	1.2535		17.3189	1.24105		17.364	1.2251		17.449	1.18524
	17.403	1.25302		17.353	1.24072		17.399	1.22238		17.485	1.1869
	17.439	1.25122		17.388	1.2413		17.434	1.2228		17.52	1.18754
	17.474	1.25423		17.422	1.24032		17.469	1.22606		17.555	1.18705
	17.509	1.25473		17.457	1.23885		17.503	1.22656		17.59	1.18527
	17.544	1.25448		17.492	1.24274		17.538	1.22568		17.626	1.18937
	17.579	1.25445		17.527	1.24382		17.574	1.22595		17.661	1.18859
	17.614	1.2549		17.562	1.24531		17.61	1.22656		17.696	1.19074
	17.648	1.25296		17.598	1.2442		17.645	1.22631		17.733	1.18899
	17.683	1.25021		17.633	1.24451		17.68	1.22582		17.77	1.18524
	17.718	1.25324		17.668	1.24625		17.715	1.22966		17.805	1.18777
	17.753	1.25355		17.703	1.24423		17.75	1.22612		17.84	1.18928
	17.788	1.25367		17.738	1.2468		17.785	1.22691		17.875	1.18786
	17.824	1.25692		17.773	1.24516		17.821	1.2245		17.912	1.18926
	17.86	1.25344		17.807	1.24297		17.856	1.22398		17.947	1.19036
	17.895	1.25229		17.842	1.24347		17.892	1.2248		17.982	1.1869
	17.93	1.25344		17.877	1.24549		17.927	1.22606		18.018	1.1887
	17.965	1.25159		17.912	1.2442		17.962	1.22653		18.053	1.18612
	18	1.25147		17.947	1.24463		17.997	1.2265		18.092	1.18821
	18.0351	1.25083		17.982	1.24334		18.032	1.22513		18.129	1.1919
	18.0701	1.25063		18.017	1.24478		18.067	1.22598		18.166	1.18931
	18.1061	1.25159		18.052	1.24398		18.102	1.22645		18.201	1.19088
	18.1421	1.24909		18.086	1.2441		18.138	1.22689		18.236	1.19257
	18.1771	1.24853		18.121	1.244		18.173	1.22752		18.272	1.19155
	18.2131	1.25077		18.156	1.24385		18.208	1.22603		18.307	1.18992
	18.2471	1.25333		18.191	1.24221		18.243	1.22639		18.341	1.19184
	18.2821	1.25364		18.226	1.24526		18.278	1.22864		18.376	1.19013
	18.3171	1.25237		18.261	1.24332		18.313	1.23133		18.411	1.18617
	18.3521	1.25271		18.296	1.24625		18.348	1.22878		18.448	1.18995
	18.3881	1.25243		18.331	1.24491		18.383	1.22831		18.482	1.19021
	18.4231	1.2519		18.367	1.24375		18.418	1.23076		18.518	1.19196
	18.4591	1.25274		18.401	1.24332		18.455	1.23246		18.553	1.19271
	18.4941	1.25232		18.436	1.24329		18.491	1.22969		18.5881	1.18957
	18.5291	1.24954		18.471	1.24213		18.526	1.23051		18.6231	1.18926
	18.5641	1.25347		18.506	1.24395		18.561	1.23158		18.6581	1.19033
	18.5991	1.25218		18.541	1.24014		18.596	1.23073		18.6941	1.19114
	18.6341	1.25164		18.576	1.24284		18.631	1.23067		18.7291	1.19173
	18.6701	1.25279		18.611	1.24092		18.666	1.23295		18.7641	1.1894
	18.7051	1.25029		18.645	1.24077		18.701	1.23356		18.8001	1.19161
	18.7411	1.2515		18.68	1.24319		18.737	1.23293		18.8351	1.18745
	18.7761	1.2526		18.716	1.24309		18.772	1.22982		18.8701	1.18882
	18.8121	1.25209		18.751	1.2413		18.807	1.2296		18.9051	1.18798
	18.8461	1.25425		18.786	1.24491		18.842	1.23144		18.9401	1.19065
	18.8811	1.25232		18.82	1.2468		18.8771	1.23029		18.9751	1.19013
	18.9171	1.24956		18.854	1.24705		18.9121	1.22914		19.0101	1.19042
	18.9511	1.25378		18.889	1.24203		18.9471	1.23087		19.0461	1.19333
	18.9881	1.25324		18.924	1.24385		18.9821	1.23021		19.0811	1.19146
	19.0241	1.25288		18.959	1.24435		19.0171	1.23185		19.1171	1.19106
	19.0591	1.25324		18.995	1.24506		19.0531	1.23111		19.1511	1.18931
	19.0941	1.25136		19.03	1.24271		19.0881	1.23177		19.1861	1.19027
	19.1291	1.25462		19.065	1.24362		19.1231	1.23328		19.2221	1.18928
	19.1641	1.25552		19.1001	1.24307		19.1581	1.23306		19.2561	1.19062
	19.1991	1.25468		19.1351	1.244		19.1931	1.23246		19.2911	1.19146
	19.2351	1.25529		19.1701	1.24375		19.2281	1.23067		19.3261	1.19158
	19.2701	1.25378		19.2051	1.24413		19.2631	1.23059		19.3621	1.19266
	19.3061	1.25201		19.2401	1.24483		19.2981	1.23015		19.3981	1.1926
	19.3411	1.25465		19.2751	1.24594		19.3331	1.22977		19.4331	1.19257
	19.3751	1.25487		19.3111	1.2438		19.3691	1.22859		19.4691	1.19077
	19.4101	1.25552		19.3471	1.24668		19.4031	1.22938		19.5041	1.1912
	19.4451	1.25555		19.3811	1.2441		19.4381	1.23111		19.5381	1.19036
	19.4801	1.25633		19.4161	1.24577		19.4731	1.22883		19.5731	1.18981
	19.5151	1.25465		19.4511	1.24534		19.5081	1.22955		19.6091	1.19071
	19.5501	1.25535		19.4861	1.24526		19.5431	1.22683		19.6451	1.19039
	19.5861	1.25549		19.5211	1.24408		19.5781	1.22881		19.6801	1.18926
	19.6211	1.25372		19.5561	1.24478		19.6131	1.229		19.7151	1.19295
	19.6561	1.25586		19.5911	1.24408		19.6481	1.22713		19.7501	1.19033
	19.6911	1.25552		19.6271	1.24451		19.6841	1.22763		19.7851	1.19045
	19.7261	1.25246		19.6621	1.24216		19.7191	1.22713		19.8211	1.19164
	19.7612	1.25411		19.6971	1.24155		19.7551	1.22842		19.8551	1.1901
	19.7972	1.25195		19.7321	1.24276		19.7891	1.22955		19.8911	1.1946
	19.8312	1.25487		19.7671	1.24352		19.8241	1.23314		19.9261	1.19187
	19.8672	1.25723		19.8021	1.24239		19.8591	1.22738		19.9611	1.19364
	19.9022	1.2544		19.8371	1.24423		19.8941	1.22936		19.9971	1.19263
	19.9372	1.25535		19.8721	1.2439		19.9301	1.23004		20.0331	1.1919
	19.9722	1.25642		19.9071	1.241		19.9641	1.2315		20.0681	1.19234
	20.0072	1.25468		19.9421	1.24393		20.0001	1.22988		20.1031	1.19193
	20.0412	1.25347		19.9771	1.24077		20.0361	1.23158		20.1371	1.19333
	20.0762	1.2572		20.0121	1.24284		20.0701	1.23095		20.1731	1.19588
	20.1112	1.25532		20.0471	1.24059		20.1051	1.22966		20.2071	1.19658
	20.1462	1.25501		20.0821	1.24408		20.1401	1.22991		20.2431	1.19879
	20.1812	1.25743		20.1161	1.24239		20.1751	1.23174		20.2781	1.19835
	20.2172	1.25375		20.1511	1.24289		20.2101	1.22947		20.3131	1.19603
	20.2532	1.25173		20.1861	1.24203		20.2451	1.23032		20.3482	1.19699
	20.2872	1.25327		20.2211	1.24115		20.2801	1.229		20.3832	1.19673
	20.3222	1.25445		20.2561	1.24226		20.3161	1.23347		20.4182	1.19844
	20.3572	1.25327		20.2911	1.24352		20.3511	1.23034		20.4532	1.20103
	20.3922	1.25442		20.3261	1.24186		20.3871	1.23183		20.4892	1.20051
	20.4272	1.25187		20.3621	1.24299		20.4221	1.23106		20.5242	1.19873
	20.4622	1.25527		20.3961	1.24226		20.4571	1.23265		20.5602	1.19978
	20.4972	1.25445		20.4311	1.244		20.4921	1.231		20.5952	1.19803
	20.5332	1.25389		20.4661	1.24181		20.5271	1.23169		20.6312	1.19943
	20.5682	1.25631		20.5011	1.24271		20.5631	1.23309		20.6652	1.19856
	20.6042	1.25409		20.5361	1.2416		20.5991	1.23394		20.7002	1.19835
	20.6392	1.25541		20.5711	1.24062		20.6342	1.23018		20.7352	1.19821
	20.6742	1.25619		20.6071	1.24191		20.6692	1.23271		20.7712	1.20231
	20.7092	1.25288		20.6421	1.24044		20.7042	1.23199		20.8052	1.20083
	20.7442	1.25344		20.6771	1.24471		20.7392	1.23293		20.8422	1.19859
	20.7792	1.25153		20.7121	1.24251		20.7742	1.23594		20.8782	1.20219
	20.8152	1.25237		20.7471	1.23943		20.8092	1.23485		20.9132	1.19891
	20.8502	1.24906		20.7821	1.24458		20.8442	1.23496		20.9472	1.19681
	20.8862	1.24723		20.8181	1.24501		20.8792	1.23559		20.9822	1.19853
	20.9202	1.25027		20.8532	1.24372		20.9162	1.23597		21.0182	1.19792
	20.9552	1.25308		20.8892	1.24486		20.9502	1.23446		21.0522	1.19911
	20.9902	1.25555		20.9242	1.23996		20.9862	1.23669		21.0882	1.20016
	21.0252	1.25499		20.9592	1.24281		21.0202	1.23707		21.1222	1.19949
	21.0602	1.25324		20.9942	1.24403		21.0552	1.23644		21.1582	1.19833
	21.0952	1.2531		21.0292	1.24329		21.0902	1.23622		21.1942	1.19815
	21.1312	1.25077		21.0642	1.24332		21.1252	1.23699		21.2302	1.20429
	21.1662	1.25409		21.0992	1.24446		21.1602	1.23597		21.2642	1.20304
	21.2012	1.24931		21.1342	1.24418		21.1952	1.23482		21.2992	1.20472
	21.2362	1.25184		21.1692	1.24521		21.2322	1.23444		21.3342	1.20176
	21.2712	1.25046		21.2042	1.24736		21.2662	1.23471		21.3702	1.20405
	21.3062	1.25164		21.2402	1.24587		21.3022	1.23918		21.4042	1.20466
	21.3412	1.251		21.2742	1.2441		21.3362	1.23652		21.4402	1.20178
	21.3762	1.25389		21.3092	1.24564		21.3712	1.23485		21.4752	1.20222
	21.4112	1.25409		21.3442	1.24456		21.4062	1.23474		21.5112	1.19911
	21.4462	1.25296		21.3792	1.24486		21.4422	1.23515		21.5462	1.20199
	21.4822	1.25249		21.4142	1.24579		21.4772	1.23336		21.5802	1.19693
	21.5163	1.25411		21.4482	1.24637		21.5112	1.23323		21.6152	1.20062
	21.5523	1.25153		21.4832	1.2438		21.5482	1.23358		21.6502	1.20443
	21.5863	1.25136		21.5182	1.24367		21.5832	1.23493		21.6852	1.20068
	21.6213	1.25086		21.5532	1.24294		21.6182	1.23655		21.7202	1.20225
	21.6573	1.25524		21.5882	1.24226		21.6532	1.23468		21.7562	1.20039
	21.6923	1.25448		21.6232	1.24377		21.6882	1.23663		21.7922	1.19969
	21.7273	1.25861		21.6582	1.24562		21.7232	1.23474		21.8282	1.201
	21.7633	1.2551		21.6932	1.24544		21.7582	1.23224		21.8632	1.20394
	21.7983	1.25361		21.7282	1.24395		21.7942	1.23207		21.8982	1.20367
	21.8343	1.25293		21.7632	1.24579		21.8292	1.23144		21.9332	1.20301
	21.8683	1.25493		21.7982	1.24819		21.8642	1.23581		21.9682	1.20516
	21.9033	1.25434		21.8332	1.24854		21.9002	1.23542		22.0042	1.20213
	21.9383	1.25468		21.8682	1.24761		21.9342	1.23666		22.0402	1.20591
	21.9733	1.25288		21.9042	1.24673		21.9692	1.23559		22.0753	1.20373
	22.0083	1.25279		21.9402	1.2463		22.0042	1.23611		22.1103	1.20629
	22.0433	1.25347		21.9752	1.24703		22.0392	1.23688		22.1453	1.20679
	22.0793	1.25243		22.0102	1.24521		22.0742	1.23734		22.1813	1.20522
	22.1143	1.25653		22.0442	1.24461		22.1092	1.23413		22.2163	1.20408
	22.1503	1.25513		22.0792	1.24423		22.1452	1.23433		22.2523	1.2042
	22.1853	1.25392		22.1142	1.24486		22.1802	1.23545		22.2893	1.20539
	22.2213	1.25277		22.1492	1.24463		22.2162	1.23792		22.3243	1.20437
	22.2553	1.24971		22.1842	1.24562		22.2502	1.2343		22.3593	1.20507
	22.2903	1.25235		22.2202	1.24539		22.2852	1.23336		22.3943	1.20213
	22.3253	1.24948		22.2562	1.24375		22.3202	1.23446		22.4293	1.20411
	22.3603	1.24968		22.2912	1.24493		22.3552	1.23364		22.4643	1.20527
	22.3963	1.2556		22.3262	1.24448		22.3903	1.23515		22.4993	1.20487
	22.4313	1.25302		22.3612	1.2465		22.4253	1.23284		22.5343	1.2046
	22.4663	1.25704		22.3962	1.24466		22.4613	1.23268		22.5703	1.206
	22.5013	1.25274		22.4312	1.24569		22.4963	1.23185		22.6063	1.20475
	22.5363	1.25543		22.4662	1.24405		22.5323	1.23205		22.6413	1.2062
	22.5713	1.25319		22.5022	1.24294		22.5663	1.23306		22.6763	1.20801
	22.6063	1.25499		22.5372	1.24506		22.6023	1.23405		22.7113	1.20751
	22.6413	1.25527		22.5732	1.24478		22.6363	1.2326		22.7463	1.20769
	22.6773	1.25206		22.6083	1.24403		22.6713	1.23334		22.7813	1.2094
	22.7123	1.25383		22.6433	1.24294		22.7063	1.23562		22.8173	1.20946
	22.7483	1.25153		22.6783	1.24176		22.7413	1.23496		22.8533	1.20908
	22.7823	1.2515		22.7133	1.24418		22.7773	1.23312		22.8893	1.2087
	22.8173	1.25159		22.7483	1.2435		22.8123	1.23282		22.9243	1.20931
	22.8523	1.25063		22.7833	1.24466		22.8483	1.22897		22.9603	1.20786
	22.8873	1.25069		22.8183	1.2461		22.8833	1.23026		22.9953	1.20873
	22.9223	1.25159		22.8533	1.24398		22.9183	1.23144		23.0293	1.20824
	22.9573	1.25164		22.8883	1.24456		22.9543	1.23139		23.0653	1.2092
	22.9933	1.24889		22.9233	1.24307		22.9893	1.23356		23.0993	1.2083
	23.0283	1.24934		22.9583	1.24342		23.0243	1.23194		23.1353	1.20766
	23.0643	1.25046		22.9933	1.24541		23.0613	1.23391		23.1713	1.20987
	23.0993	1.24676		23.0283	1.24607		23.0963	1.23122		23.2063	1.2069
	23.1343	1.25069		23.0633	1.24138		23.1313	1.2307		23.2413	1.20745
	23.1693	1.2492		23.0983	1.24342		23.1663	1.23103		23.2763	1.20745
	23.2043	1.25316		23.1343	1.24211		23.2013	1.22798		23.3113	1.20376
	23.2393	1.25013		23.1693	1.24567		23.2363	1.23122		23.3473	1.20397
	23.2734	1.25018		23.2053	1.24405		23.2713	1.23117		23.3833	1.20632
	23.3084	1.25133		23.2403	1.24746		23.3063	1.23188		23.4193	1.20655
	23.3444	1.25147		23.2753	1.24516		23.3423	1.23229		23.4553	1.20792
	23.3794	1.25131		23.3103	1.24529		23.3773	1.2335		23.4903	1.20417
	23.4144	1.25159		23.3453	1.24572		23.4133	1.23147		23.5253	1.20542
	23.4484	1.24987		23.3803	1.24486		23.4473	1.23081		23.5603	1.20338
	23.4834	1.25136		23.4143	1.24332		23.4823	1.23334		23.5953	1.20516
	23.5184	1.25029		23.4503	1.2438		23.5173	1.23356		23.6303	1.20405
	23.5534	1.24813		23.4853	1.24158		23.5523	1.23265		23.6653	1.20399
	23.5884	1.24926		23.5203	1.24627		23.5873	1.23229		23.7013	1.20472
	23.6234	1.24985		23.5553	1.24549		23.6253	1.23254		23.7373	1.20202
	23.6594	1.24928		23.5903	1.24405		23.6613	1.2332		23.7723	1.20234
	23.6944	1.25327		23.6253	1.24549		23.6963	1.23438		23.8073	1.20434
	23.7304	1.2535		23.6603	1.24776		23.7313	1.23015		23.8424	1.2026
	23.7644	1.25041		23.6953	1.24574		23.7663	1.22963		23.8784	1.20431
	23.7994	1.2515		23.7303	1.24514		23.8013	1.23029		23.9124	1.20574
	23.8344	1.25117		23.7663	1.2461		23.8363	1.231		23.9484	1.20504
	23.8694	1.25164		23.8013	1.24572		23.8713	1.22859		23.9844	1.2053
	23.9044	1.24987		23.8373	1.24743		23.9073	1.23136		24.0204	1.20565
	23.9404	1.25133		23.8723	1.24832		23.9423	1.23007		24.0554	1.20551
	23.9754	1.25361		23.9073	1.24685		23.9773	1.23191		24.0904	1.20373
	24.0104	1.25546		23.9423	1.24554		24.0133	1.23056		24.1264	1.20356
	24.0454	1.2524		23.9773	1.24776		24.0473	1.23249		24.1614	1.2035
	24.0804	1.25243		24.0123	1.24708		24.0823	1.23273		24.1974	1.20516
	24.1154	1.2517		24.0473	1.24652		24.1173	1.23229		24.2324	1.20184
	24.1504	1.2515		24.0823	1.24718		24.1524	1.22966		24.2674	1.2062
	24.1854	1.25324		24.1173	1.2463		24.1874	1.23117		24.3034	1.2044
	24.2214	1.25201		24.1523	1.24705		24.2244	1.23578		24.3394	1.20193
	24.2554	1.25501		24.1873	1.24559		24.2604	1.23405		24.3734	1.20402
	24.2914	1.25103		24.2223	1.24668		24.2944	1.23114		24.4094	1.20385
	24.3264	1.25229		24.2573	1.24498		24.3284	1.23185		24.4434	1.20429
	24.3614	1.25372		24.2923	1.24617		24.3634	1.23158		24.4784	1.1978
	24.3964	1.25131		24.3273	1.24481		24.3984	1.23221		24.5144	1.20272
	24.4314	1.25128		24.3624	1.24688		24.4334	1.2332		24.5494	1.20327
	24.4664	1.24906		24.3974	1.24673		24.4684	1.23347		24.5854	1.20484
	24.5014	1.2492		24.4324	1.24529		24.5034	1.22982		24.6204	1.20248
	24.5364	1.24923		24.4674	1.24408		24.5394	1.22971		24.6554	1.20431
	24.5714	1.25032		24.5024	1.24329		24.5744	1.23147		24.6904	1.20417
	24.6074	1.25274		24.5374	1.24498		24.6104	1.23306		24.7264	1.20272
	24.6424	1.25279		24.5724	1.24549		24.6454	1.23092		24.7624	1.20556
	24.6774	1.25066		24.6074	1.24519		24.6804	1.23271		24.7994	1.20574
	24.7124	1.25147		24.6424	1.24382		24.7154	1.23314		24.8344	1.20437
	24.7474	1.25195		24.6774	1.2466		24.7504	1.23089		24.8694	1.20138
	24.7824	1.25305		24.7124	1.24708		24.7854	1.23358		24.9054	1.20423
	24.8174	1.25128		24.7484	1.24776		24.8204	1.2318		24.9394	1.20272
	24.8524	1.24982		24.7824	1.24958		24.8554	1.23282		24.9744	1.20295
	24.8874	1.24926		24.8174	1.24948		24.8914	1.23309		25.0094	1.20263
	24.9234	1.25058		24.8524	1.24524		24.9264	1.23542		25.0454	1.20379
	24.9594	1.24824		24.8874	1.24789		24.9604	1.23603		25.0804	1.20478
	24.9954	1.25091		24.9224	1.24577		24.9954	1.23045		25.1154	1.20513
	25.0295	1.2517		24.9574	1.24345		25.0304	1.23419		25.1514	1.20565
	25.0645	1.25206		24.9924	1.24387		25.0654	1.23652		25.1864	1.20513
	25.0995	1.2547		25.0274	1.24418		25.1004	1.2343		25.2214	1.20562
	25.1345	1.25355		25.0634	1.2444		25.1354	1.23427		25.2574	1.20495
	25.1695	1.25251		25.0974	1.24531		25.1724	1.23647		25.2924	1.20612
	25.2065	1.25428		25.1324	1.24319		25.2084	1.23422		25.3264	1.20397
	25.2425	1.2506		25.1674	1.24244		25.2424	1.23301		25.3624	1.20423
	25.2765	1.25184		25.2024	1.24382		25.2774	1.23669		25.3984	1.20513
	25.3115	1.2524		25.2374	1.24158		25.3124	1.2388		25.4334	1.20184
	25.3465	1.2531		25.2724	1.24229		25.3474	1.23696		25.4684	1.2051
	25.3815	1.25265		25.3074	1.24458		25.3824	1.23515		25.5034	1.19952
	25.4165	1.25406		25.3424	1.24478		25.4174	1.23564		25.5384	1.2028
	25.4515	1.25428		25.3774	1.24155		25.4534	1.23515		25.5745	1.20085
	25.4865	1.25678		25.4124	1.24365		25.4884	1.23866		25.6085	1.20144
	25.5225	1.25237		25.4474	1.24183		25.5244	1.23721		25.6435	1.19963
	25.5585	1.25119		25.4824	1.24362		25.5594	1.23773		25.6805	1.19742
	25.5935	1.25538		25.5174	1.24334		25.5944	1.23817		25.7145	1.2001
	25.6285	1.25336		25.5524	1.24347		25.6294	1.23707		25.7505	1.2003
	25.6635	1.25389		25.5874	1.24539		25.6644	1.23754		25.7855	1.20318
	25.6985	1.25223		25.6224	1.24097		25.6994	1.23616		25.8205	1.20274
	25.7335	1.25164		25.6574	1.24186		25.7344	1.24001		25.8555	1.20254
	25.7675	1.25341		25.6924	1.24249		25.7704	1.23781		25.8905	1.20402
	25.8045	1.25285		25.7284	1.24256		25.8064	1.23369		25.9255	1.20176
	25.8385	1.25088		25.7634	1.24345		25.8414	1.23671		25.9615	1.20583
	25.8745	1.24954		25.7984	1.2435		25.8765	1.23592		25.9965	1.20414
	25.9095	1.25484		25.8334	1.24524		25.9115	1.2385		26.0325	1.20272
	25.9445	1.25271		25.8684	1.24367		25.9475	1.23874		26.0685	1.20286
	25.9795	1.25046		25.9034	1.2461		25.9815	1.23809		26.1045	1.20632
	26.0145	1.25004		25.9384	1.24446		26.0165	1.23842		26.1385	1.20664
	26.0505	1.24945		25.9734	1.24413		26.0515	1.23946		26.1745	1.20745
	26.0845	1.24903		26.0084	1.2408		26.0865	1.23951		26.2095	1.2103
	26.1205	1.25147		26.0444	1.23885		26.1215	1.236		26.2455	1.20626
	26.1565	1.25063		26.0784	1.24259		26.1565	1.23707		26.2815	1.20498
	26.1905	1.25041		26.1145	1.24012		26.1915	1.2352		26.3165	1.20644
	26.2255	1.24982		26.1485	1.24102		26.2265	1.2349		26.3515	1.20638
	26.2605	1.25462		26.1835	1.2417		26.2615	1.23729		26.3865	1.20856
	26.2955	1.25173		26.2185	1.24123		26.2975	1.2371		26.4215	1.20757
	26.3305	1.25454		26.2535	1.24352		26.3315	1.23663		26.4565	1.20786
	26.3655	1.25271		26.2885	1.2417		26.3675	1.23693		26.4925	1.2099
	26.4005	1.25086		26.3235	1.24329		26.4025	1.23468		26.5285	1.20917
	26.4365	1.25097		26.3595	1.24443		26.4385	1.23619		26.5645	1.20856
	26.4725	1.25538		26.3945	1.24284		26.4735	1.23597		26.5995	1.20827
	26.5075	1.25293		26.4305	1.24218		26.5095	1.23427		26.6335	1.20902
	26.5425	1.25223		26.4655	1.24428		26.5445	1.23759		26.6685	1.21042
	26.5775	1.25052		26.5005	1.24372		26.5795	1.23702		26.7035	1.20882
	26.6135	1.25319		26.5355	1.2438		26.6145	1.23691		26.7395	1.20728
	26.6475	1.24805		26.5705	1.24612		26.6515	1.23877		26.7735	1.20789
	26.6825	1.25122		26.6055	1.24393		26.6875	1.24056		26.8095	1.20734
	26.7185	1.251		26.6405	1.24382		26.7215	1.23745		26.8445	1.20902
	26.7536	1.25279		26.6765	1.24211		26.7565	1.23737		26.8805	1.20888
	26.7896	1.24999		26.7105	1.24468		26.7915	1.23973		26.9155	1.20961
	26.8236	1.25389		26.7465	1.24226		26.8265	1.2368		26.9515	1.21324
	26.8586	1.25299		26.7815	1.24393		26.8615	1.23542		26.9865	1.21062
	26.8926	1.25299		26.8165	1.24148		26.8965	1.2402		27.0215	1.21138
	26.9276	1.25136		26.8515	1.24287		26.9315	1.23611		27.0565	1.21193
	26.9626	1.24597		26.8865	1.24133		26.9675	1.23839		27.0925	1.21065
	26.9976	1.24839		26.9215	1.24274		27.0035	1.23973		27.1275	1.21193
	27.0326	1.24723		26.9565	1.24332		27.0385	1.23872		27.1635	1.21251
	27.0686	1.24912		26.9925	1.24163		27.0735	1.23965		27.1985	1.21603
	27.1026	1.24999		27.0285	1.24241		27.1085	1.23762		27.2345	1.21318
	27.1386	1.24819		27.0645	1.24155		27.1435	1.23858		27.2685	1.21527
	27.1726	1.25029		27.0995	1.24067		27.1785	1.23691		27.3035	1.21513
	27.2076	1.2494		27.1335	1.23911		27.2135	1.23883		27.3396	1.21318
	27.2426	1.25341		27.1685	1.2417		27.2495	1.24034		27.3746	1.21426
	27.2776	1.25223		27.2035	1.24317		27.2845	1.24025		27.4106	1.21429
	27.3126	1.25013		27.2385	1.24486		27.3205	1.23762		27.4456	1.21551
	27.3476	1.25206		27.2725	1.24271		27.3555	1.24042		27.4816	1.21324
	27.3836	1.25195		27.3085	1.24496		27.3905	1.24297		27.5166	1.21376
	27.4186	1.24861		27.3435	1.24471		27.4255	1.24138		27.5506	1.21394
	27.4546	1.25192		27.3785	1.2436		27.4605	1.24187		27.5856	1.21272
	27.4886	1.25282		27.4135	1.24647		27.4955	1.24113		27.6216	1.21097
	27.5236	1.24861		27.4485	1.24743		27.5305	1.24006		27.6556	1.21074
	27.5586	1.25201		27.4835	1.24604		27.5655	1.24069		27.6916	1.21277
	27.5936	1.25282		27.5185	1.24496		27.6005	1.24086		27.7276	1.20966
	27.6286	1.24976		27.5535	1.24536		27.6366	1.24025		27.7626	1.21126
	27.6646	1.25546		27.5895	1.24488		27.6726	1.23957		27.7976	1.21074
	27.7006	1.25476		27.6245	1.24456		27.7076	1.23861		27.8316	1.21533
	27.7366	1.25425		27.6605	1.24198		27.7416	1.24014		27.8676	1.21248
	27.7716	1.25572		27.6945	1.24284		27.7766	1.24086		27.9026	1.21155
	27.8066	1.25689		27.7285	1.2412		27.8116	1.23902		27.9376	1.21789
	27.8426	1.25369		27.7635	1.24357		27.8486	1.24212		27.9746	1.2142
	27.8776	1.25557		27.7985	1.2434		27.8836	1.24168		28.0106	1.21286
	27.9126	1.25367		27.8335	1.24334		27.9186	1.24075		28.0466	1.21353
	27.9466	1.25215		27.8686	1.24112		27.9536	1.2394		28.0816	1.21478
	27.9826	1.25344		27.9036	1.24176		27.9886	1.241		28.1156	1.21365
	28.0186	1.25336		27.9396	1.24387		28.0236	1.243		28.1506	1.20958
	28.0536	1.2535		27.9746	1.24234		28.0586	1.23888		28.1856	1.21237
	28.0886	1.25608		28.0096	1.24201		28.0936	1.2385		28.2206	1.21228
	28.1236	1.2551		28.0446	1.23999		28.1286	1.23894		28.2576	1.21234
	28.1586	1.25139		28.0786	1.24191		28.1646	1.23891		28.2936	1.2112
	28.1936	1.25178		28.1136	1.24117		28.2006	1.23866		28.3306	1.21176
	28.2286	1.25243		28.1486	1.23847		28.2356	1.23971		28.3656	1.21615
	28.2656	1.25249		28.1836	1.24017		28.2706	1.23682		28.4006	1.21399
	28.2996	1.25409		28.2186	1.24196		28.3056	1.23402		28.4346	1.21434
	28.3356	1.25184		28.2526	1.24059		28.3406	1.2391		28.4696	1.21763
	28.3716	1.25442		28.2896	1.24256		28.3756	1.23993		28.5056	1.21696
	28.4066	1.25588		28.3236	1.24241		28.4106	1.23916		28.5406	1.21652
	28.4406	1.25743		28.3596	1.24075		28.4466	1.23847		28.5766	1.21757
	28.4756	1.2542		28.3946	1.24092		28.4816	1.23545		28.6116	1.21472
	28.5107	1.25518		28.4296	1.24254		28.5176	1.238		28.6466	1.21652
	28.5467	1.25515		28.4646	1.24562		28.5526	1.23778		28.6816	1.21539
	28.5817	1.25397		28.4996	1.24251		28.5876	1.23551		28.7176	1.21658
	28.6177	1.25605		28.5336	1.24375		28.6226	1.23688		28.7536	1.21673
	28.6517	1.25642		28.5686	1.24234		28.6576	1.23485		28.7896	1.21623
	28.6867	1.25563		28.6046	1.24541		28.6926	1.23806		28.8256	1.21423
	28.7217	1.25664		28.6396	1.24375		28.7286	1.23765		28.8606	1.2144
	28.7567	1.25462		28.6746	1.2442		28.7636	1.23655		28.8966	1.21516
	28.7917	1.25524		28.7096	1.24448		28.7996	1.23844		28.9306	1.21495
	28.8267	1.25403		28.7446	1.24287		28.8336	1.23603		28.9656	1.21571
	28.8627	1.25532		28.7796	1.24579		28.8686	1.23435		29.0006	1.21708
	28.8977	1.25462		28.8146	1.24491		28.9036	1.2332		29.0356	1.2142
	28.9337	1.2535		28.8496	1.24435		28.9386	1.23257		29.0717	1.21632
	28.9677	1.25299		28.8846	1.2444		28.9736	1.23287		29.1077	1.21277
	29.0027	1.25372		28.9206	1.24446		29.0086	1.23575		29.1437	1.21353
	29.0367	1.25549		28.9556	1.2471		29.0446	1.2329		29.1777	1.21417
	29.0717	1.25645		28.9906	1.24622		29.0796	1.23323		29.2127	1.21257
	29.1067	1.25608		29.0256	1.24418		29.1146	1.23468		29.2477	1.21138
	29.1417	1.25358		29.0606	1.24251		29.1496	1.23452		29.2837	1.21495
	29.1777	1.25605		29.0956	1.24241		29.1846	1.23551		29.3177	1.21318
	29.2137	1.25732		29.1306	1.24324		29.2196	1.23284		29.3537	1.21269
	29.2477	1.25616		29.1656	1.2434		29.2546	1.23452		29.3887	1.20952
	29.2837	1.25704		29.2006	1.24148		29.2896	1.23375		29.4247	1.21106
	29.3187	1.25779		29.2366	1.24206		29.3246	1.23358		29.4607	1.21118
	29.3537	1.25633		29.2726	1.24468		29.3606	1.23482		29.4947	1.21179
	29.3897	1.25434		29.3076	1.24493		29.3957	1.23295		29.5307	1.21219
	29.4237	1.25395		29.3426	1.24221		29.4317	1.23169		29.5647	1.21155
	29.4587	1.25541		29.3786	1.24534		29.4657	1.23295		29.5997	1.21074
	29.4947	1.25557		29.4126	1.24317		29.5007	1.2318		29.6357	1.21211
	29.5307	1.25409		29.4476	1.24312		29.5357	1.23369		29.6717	1.21065
	29.5657	1.25538		29.4826	1.24468		29.5707	1.23567		29.7067	1.21135
	29.6017	1.25265		29.5186	1.24506		29.6057	1.23427		29.7417	1.21123
	29.6357	1.25496		29.5536	1.24577		29.6407	1.23229		29.7767	1.21042
	29.6707	1.25442		29.5887	1.24387		29.6767	1.23611		29.8127	1.20844
	29.7057	1.25566		29.6237	1.24599		29.7127	1.23507		29.8467	1.21231
	29.7397	1.25386		29.6587	1.24703		29.7477	1.23605		29.8817	1.21091
	29.7747	1.25555		29.6937	1.24791		29.7817	1.23523		29.9167	1.21597
	29.8117	1.25748		29.7287	1.24794		29.8167	1.2343		29.9527	1.21542
	29.8457	1.25448		29.7637	1.24705		29.8517	1.23449		29.9887	1.21196
	29.8817	1.2549		29.7987	1.24741		29.8867	1.23449		30.0237	1.20943
	29.9157	1.25406		29.8347	1.24337		29.9217	1.23619		30.0587	1.21091
	29.9507	1.25504		29.8697	1.24418		29.9567	1.2354		30.0937	1.20955
	29.9857	1.25308		29.9057	1.24425		29.9927	1.23715		30.1297	1.21074
	30.0207	1.25243		29.9397	1.24511		30.0277	1.23677		30.1647	1.21405
	30.0557	1.25583		29.9747	1.24493		30.0637	1.23825		30.1997	1.21141
	30.0907	1.25257		30.0097	1.24554		30.0987	1.23504		30.2357	1.21315
	30.1277	1.25044		30.0447	1.24276		30.1337	1.23855		30.2707	1.21449
	30.1617	1.25013		30.0797	1.24483		30.1687	1.24009		30.3057	1.21373
	30.1977	1.25055		30.1147	1.24748		30.2037	1.23839		30.3417	1.21208
	30.2327	1.25069		30.1507	1.24834		30.2387	1.23726		30.3777	1.21315
	30.2668	1.24959		30.1857	1.24456		30.2737	1.23839		30.4137	1.21254
	30.3028	1.25361		30.2207	1.24776		30.3097	1.23685		30.4477	1.21286
	30.3378	1.25375		30.2547	1.24645		30.3437	1.23842		30.4847	1.21365
	30.3718	1.25507		30.2897	1.24594		30.3797	1.23767		30.5207	1.21231
	30.4068	1.25428		30.3247	1.2469		30.4137	1.23831		30.5567	1.21336
	30.4438	1.25274		30.3597	1.24589		30.4487	1.23806		30.5907	1.21452
	30.4778	1.25423		30.3947	1.24673		30.4837	1.23916		30.6267	1.21493
	30.5138	1.25577		30.4297	1.2437		30.5187	1.23982		30.6617	1.21862
	30.5478	1.25448		30.4647	1.24842		30.5537	1.2371		30.6957	1.21458
	30.5828	1.25431		30.5007	1.24685		30.5887	1.23957		30.7317	1.21251
	30.6178	1.25518		30.5367	1.24819		30.6247	1.23836		30.7667	1.2137
	30.6528	1.25358		30.5707	1.24519		30.6597	1.23655		30.8027	1.21266
	30.6878	1.25279		30.6057	1.24544		30.6947	1.23899		30.8378	1.21318
	30.7228	1.25369		30.6407	1.2463		30.7307	1.23861		30.8738	1.21272
	30.7588	1.25414		30.6757	1.24907		30.7647	1.23847		30.9078	1.21306
	30.7938	1.25302		30.7107	1.24821		30.7997	1.23806		30.9428	1.21086
	30.8298	1.25341		30.7457	1.24965		30.8347	1.23658		30.9778	1.21196
	30.8638	1.25437		30.7807	1.24731		30.8697	1.23559		31.0138	1.2101
	30.8988	1.24971		30.8167	1.24721		30.9047	1.23616		31.0488	1.21173
	30.9338	1.24971		30.8527	1.24695		30.9407	1.238		31.0848	1.21446
	30.9688	1.25277		30.8867	1.24698		30.9757	1.24069		31.1208	1.21344
	31.0038	1.25229		30.9217	1.24617		31.0117	1.23954		31.1558	1.21609
	31.0388	1.2524		30.9567	1.24539		31.0467	1.23921		31.1908	1.21333
	31.0748	1.25566		30.9917	1.24751		31.0817	1.2382		31.2258	1.21527
	31.1098	1.25479		31.0267	1.25008		31.1168	1.23825		31.2608	1.21655
	31.1458	1.25305		31.0617	1.24935		31.1518	1.2396		31.2958	1.2149
	31.1798	1.25223		31.0977	1.24801		31.1868	1.23372		31.3318	1.21498
	31.2148	1.25173		31.1327	1.24892		31.2228	1.23776		31.3668	1.21452
	31.2498	1.25285		31.1677	1.24927		31.2568	1.23721		31.4028	1.21798
	31.2848	1.25338		31.2027	1.24978		31.2918	1.23298		31.4378	1.21769
	31.3208	1.25235		31.2377	1.24864		31.3268	1.23704		31.4738	1.21792
	31.3548	1.25161		31.2727	1.25013		31.3618	1.2366		31.5098	1.21597
	31.3908	1.25041		31.3077	1.24751		31.3968	1.23605		31.5448	1.21583
	31.4268	1.25024		31.3428	1.24741		31.4318	1.23614		31.5798	1.21876
	31.4608	1.25133		31.3778	1.24824		31.4668	1.23548		31.6158	1.21525
	31.4958	1.25103		31.4138	1.24506		31.5018	1.23781		31.6518	1.2174
	31.5308	1.25105		31.4488	1.2468		31.5368	1.2363		31.6868	1.21466
	31.5658	1.24962		31.4848	1.24529		31.5728	1.23713		31.7218	1.21894
	31.6008	1.25122		31.5188	1.24244		31.6078	1.23397		31.7568	1.21853
	31.6358	1.24886		31.5538	1.24428		31.6428	1.23713		31.7918	1.21571
	31.6708	1.25161		31.5888	1.24347		31.6778	1.23677		31.8268	1.21437
	31.7068	1.25313		31.6238	1.24451		31.7128	1.23251		31.8618	1.2162
	31.7418	1.25066		31.6588	1.24385		31.7478	1.23831		31.8988	1.2162
	31.7768	1.25515		31.6938	1.24509		31.7828	1.23677		31.9348	1.21865
	31.8108	1.25282		31.7298	1.24741		31.8178	1.23592		31.9708	1.21853
	31.8458	1.25369		31.7648	1.24693		31.8528	1.23493		32.0058	1.21737
	31.8808	1.25768		31.8008	1.24733		31.8888	1.2349		32.0398	1.21926
	31.9158	1.25265		31.8358	1.24504		31.9238	1.23169		32.0748	1.21716
	31.9508	1.25029		31.8708	1.24741		31.9588	1.23553		32.1098	1.21551
	31.9858	1.25108		31.9058	1.24688		31.9938	1.23891		32.1458	1.22019
	32.0219	1.24956		31.9408	1.24811		32.0288	1.23562		32.1818	1.21902
	32.0569	1.24965		31.9758	1.24526		32.0638	1.23751		32.2168	1.2194
	32.0919	1.25313		32.0108	1.24587		32.0988	1.23792		32.2518	1.22065
	32.1269	1.25324		32.0468	1.2468		32.1338	1.23556		32.2878	1.22019
	32.1629	1.25058		32.0808	1.24688		32.1688	1.2374		32.3228	1.22004
	32.1969	1.25218		32.1158	1.24435		32.2048	1.23748		32.3568	1.21993
	32.2319	1.25204		32.1508	1.24577		32.2408	1.23523		32.3918	1.22065
	32.2679	1.25125		32.1848	1.24052		32.2758	1.23619		32.4278	1.2192
	32.3019	1.25291		32.2198	1.24216		32.3098	1.23682		32.4638	1.22077
	32.3389	1.25215		32.2548	1.24314		32.3448	1.23644		32.4998	1.21777
	32.3749	1.2558		32.2898	1.2411		32.3808	1.2349		32.5358	1.21545
	32.4099	1.25324		32.3248	1.24017		32.4148	1.23756		32.5709	1.21405
	32.4439	1.25178		32.3598	1.2434		32.4498	1.23504		32.6069	1.21722
	32.4789	1.25305		32.3958	1.24246		32.4858	1.2335		32.6409	1.21234
	32.5139	1.24603		32.4318	1.24453		32.5208	1.23268		32.6759	1.21292
	32.5489	1.24721		32.4668	1.24334		32.5558	1.23196		32.7119	1.2133
	32.5839	1.24985		32.5018	1.24304		32.5908	1.23394		32.7469	1.21513
	32.6199	1.2481		32.5368	1.24451		32.6248	1.2352		32.7829	1.21286
	32.6549	1.25052		32.5718	1.24334		32.6598	1.23545		32.8179	1.2149
	32.6889	1.24886		32.6068	1.24292		32.6948	1.23331		32.8529	1.21588
	32.7249	1.25161		32.6418	1.24191		32.7298	1.23356		32.8889	1.21745
	32.7599	1.2519		32.6778	1.24443		32.7648	1.23603		32.9229	1.21591
	32.7949	1.24945		32.7128	1.24544		32.7998	1.23663		32.9579	1.22045
	32.8299	1.25291		32.7488	1.24496		32.8358	1.23734		32.9929	1.22254
	32.8649	1.25131		32.7838	1.24708		32.8709	1.23636		33.0289	1.22019
	32.8999	1.24959		32.8188	1.2461		32.9059	1.23581		33.0649	1.22115
	32.9349	1.24895		32.8538	1.24433		32.9409	1.23545		33.0999	1.22103
	32.9709	1.24985		32.8888	1.24504		32.9759	1.23765		33.1359	1.22126
	33.0049	1.25122		32.9228	1.24708		33.0109	1.23394		33.1709	1.22432
	33.0409	1.24751		32.9578	1.24418		33.0449	1.23444		33.2069	1.2217
	33.0759	1.25046		32.9938	1.24589		33.0799	1.23463		33.2409	1.22248
	33.1109	1.25122		33.0298	1.24632		33.1139	1.23282		33.2769	1.22426
	33.1459	1.25223		33.0648	1.24741		33.1489	1.23427		33.3129	1.22013
	33.1809	1.25007		33.0999	1.24713		33.1849	1.23372		33.3479	1.2212
	33.2159	1.24968		33.1349	1.24774		33.2199	1.23542		33.3839	1.22007
	33.2509	1.24619		33.1699	1.24695		33.2549	1.23869		33.4249	1.22042
	33.2859	1.24645		33.2049	1.24703		33.2899	1.23702		33.4609	1.22219
	33.3209	1.24937		33.2399	1.24991		33.3249	1.23905		33.4969	1.22147
	33.3569	1.24971		33.2749	1.25147		33.3589	1.23949		33.5319	1.22083
	33.3909	1.24909		33.3109	1.24816		33.3939	1.23773		33.5669	1.21772
	33.4259	1.25024		33.3449	1.24832		33.4289	1.2399		33.6019	1.21902
	33.4609	1.24707		33.3809	1.24635		33.4639	1.23762		33.6369	1.22042
	33.4959	1.24959		33.4149	1.25051		33.4989	1.2388		33.6719	1.21769
	33.5319	1.25215		33.4499	1.24476		33.5349	1.2377		33.7079	1.21728
	33.5679	1.24864		33.4849	1.2442		33.5709	1.23556		33.7429	1.21461
	33.6029	1.25161		33.5199	1.24456		33.6059	1.23666		33.7779	1.21798
	33.6389	1.2526		33.5549	1.24587		33.6409	1.23411		33.8139	1.21862
	33.6729	1.25204		33.5899	1.24562		33.6759	1.23537		33.8489	1.21612
	33.7079	1.25105		33.6259	1.24329		33.7109	1.23822		33.8839	1.21324
	33.7439	1.25007		33.6609	1.24498		33.7459	1.23562		33.9199	1.21975
	33.778	1.25299		33.6959	1.24355		33.7809	1.23663		33.9539	1.21734
	33.813	1.25091		33.7309	1.24486		33.8179	1.23394		33.9889	1.21632
	33.848	1.24956		33.7659	1.24685		33.8529	1.23762		34.0239	1.21405
	33.883	1.25293		33.8009	1.24592		33.8879	1.23869		34.0599	1.22065
	33.919	1.25027		33.8359	1.24615		33.9219	1.23971		34.0959	1.22091
	33.953	1.25066		33.8709	1.24705		33.9569	1.23776		34.1309	1.22027
	33.989	1.24883		33.9059	1.24473		33.9919	1.23767		34.1659	1.22039
	34.023	1.25161		33.9419	1.24541		34.0269	1.23504		34.2009	1.21946
	34.058	1.24987		33.9779	1.24355		34.0619	1.23608		34.2369	1.2169
	34.093	1.25097		34.0129	1.24526		34.0969	1.23691		34.2709	1.21891
	34.128	1.251		34.0479	1.24594		34.1329	1.23869		34.3059	1.2192
	34.164	1.24883		34.0829	1.2443		34.1679	1.2396		34.343	1.21798
	34.198	1.25027		34.1179	1.24438					34.379	1.21865
				34.1529	1.24491					34.414	1.21827
				34.1879	1.24178					34.449	1.22373
				34.2249	1.24355					34.485	1.22135
				34.2599	1.24504					34.52	1.22071
				34.2949	1.24456					34.555	1.2153
				34.3299	1.24428					34.591	1.21554
				34.3649	1.2439					34.626	1.2215
				34.3999	1.24208					34.662	1.22062
				34.4349	1.24163					34.697	1.22109
				34.4699	1.24279					34.733	1.21943
				34.5049	1.24107					34.768	1.22062
				34.5409	1.24115					34.803	1.22091
				34.5769	1.24264					34.839	1.21696
				34.6119	1.24254					34.875	1.2185
				34.6469	1.24064					34.911	1.21597
				34.6809	1.24266					34.946	1.21629
				34.7159	1.24059					34.981	1.21972
				34.7519	1.24186					35.017	1.21905
				34.7859	1.24196					35.051	1.21556
				34.8219	1.2441					35.086	1.21397
				34.858	1.24312					35.122	1.21853
				34.893	1.24395					35.157	1.216
				34.928	1.24042					35.193	1.21734
				34.963	1.24226					35.227	1.21929
				34.998	1.24112					35.262	1.21644
				35.033	1.24128					35.297	1.21693
										35.332	1.2176
										35.368	1.21635
										35.402	1.21597
										35.437	1.21655
										35.473	1.21911
										35.508	1.21838
										35.543	1.21638
										35.578	1.21373
										35.614	1.21216
										35.648	1.21405
										35.684	1.21679
										35.718	1.21885
										35.753	1.21708
										35.789	1.21237
										35.825	1.2133
										35.86	1.21429
										35.895	1.21391
										35.93	1.20943
										35.966	1.21347
										36.001	1.21295
										36.038	1.21292
										36.0731	1.21213
										36.1081	1.21359
										36.1431	1.21286
										36.1791	1.21603
										36.2131	1.21475
										36.2491	1.21237
										36.2831	1.2119
										36.3191	1.21306
										36.3551	1.21277
										36.3911	1.21144
										36.4271	1.21434
										36.4631	1.21397
										36.4981	1.21481
										36.5331	1.2133
										36.5681	1.21298
										36.6041	1.21586
										36.6381	1.21591
										36.6741	1.21868
										36.7091	1.21722
										36.7441	1.21638
										36.7791	1.21946
										36.8151	1.21705
										36.8491	1.22025
										36.8861	1.21972
										36.9221	1.22039
										36.9581	1.22115
										36.9921	1.22039
										37.0281	1.21853
										37.0621	1.21923
										37.0971	1.22025
										37.1321	1.21937
										37.1691	1.21969
										37.2031	1.21722
										37.2391	1.21748
										37.2741	1.22025
										37.3091	1.21838
										37.3441	1.21882
										37.3791	1.2215
										37.4141	1.21932
										37.4501	1.22129
										37.4861	1.22036
										37.5211	1.21882
										37.5561	1.22118
										37.5921	1.21952
										37.6271	1.22243
										37.6611	1.22228
										37.6961	1.22001
										37.7311	1.22097
										37.7681	1.2192
										37.8031	1.21792
										37.8372	1.2153
										37.8722	1.21772
										37.9072	1.21882
										37.9422	1.21911
										37.9782	1.21513
										38.0132	1.2149
										38.0472	1.21507
										38.0842	1.21673
										38.1202	1.21525
										38.1562	1.21684
										38.1912	1.21725
										38.2262	1.21783
										38.2612	1.21679
										38.2962	1.21693
										38.3332	1.21696
										38.3672	1.21536
										38.4032	1.21647
										38.4382	1.21629
										38.4732	1.2169
										38.5082	1.21981
										38.5442	1.21888
										38.5782	1.21655
										38.6142	1.21998
										38.6492	1.21862
										38.6852	1.21798
										38.7202	1.21754
										38.7552	1.21952
										38.7912	1.21862
										38.8252	1.21821
										38.8612	1.22033
										38.8952	1.21734
										38.9322	1.2174
										38.9682	1.21699
										39.0032	1.21711
										39.0382	1.21641
										39.0732	1.21815
										39.1092	1.2183
										39.1442	1.21455
										39.1812	1.21559
										39.2162	1.21504
										39.2512	1.21894
										39.2862	1.2174
										39.3212	1.21731
										39.3562	1.22001
										39.3922	1.21905
										39.4272	1.21772
										39.4642	1.2183
										39.5002	1.21859
										39.5352	1.21908
										39.5713	1.21853
										39.6063	1.2194
										39.6413	1.21905
										39.6763	1.22228
										39.7113	1.22516
										39.7473	1.22129
										39.7823	1.2203
										39.8183	1.21946
										39.8543	1.22129
										39.8883	1.22446
										39.9233	1.2235
										39.9593	1.22243
										39.9943	1.2228
										40.0293	1.22106
										40.0653	1.22321
										40.1003	1.22158
										40.1353	1.22309
										40.1713	1.22286
										40.2063	1.22214
										40.2413	1.22304
										40.2783	1.21879
										40.3143	1.22123
										40.3503	1.2244
										40.3853	1.21955
										40.4203	1.22292
										40.4543	1.22126
										40.4893	1.21853
										40.5253	1.22312
										40.5603	1.21754
										40.5963	1.22225
										40.6323	1.22411
										40.6663	1.22402
										40.7013	1.22141
										40.7363	1.22147
										40.7713	1.22176
										40.8063	1.22083
										40.8423	1.22199
										40.8783	1.2253
										40.9143	1.2249
										40.9483	1.22356
										40.9833	1.22243
										41.0193	1.22141
										41.0543	1.22173
										41.0893	1.22211
										41.1263	1.2208
										41.1603	1.22347
										41.1963	1.22315
										41.2313	1.22237
										41.2673	1.22173
										41.3024	1.22289
										41.3374	1.22216
										41.3724	1.22493
										41.4094	1.22007
										41.4454	1.21955
										41.4804	1.22144
										41.5154	1.22118
										41.5504	1.22077
										41.5854	1.21815
										41.6204	1.22141
										41.6564	1.22182
										41.6914	1.22088
										41.7274	1.22368
										41.7624	1.22344
										41.7984	1.22574
										41.8324	1.22103
										41.8674	1.22423
										41.9034	1.22231
										41.9374	1.22542
										41.9734	1.22394
										42.0084	1.22347
										42.0444	1.22394
										42.0804	1.22205
										42.1154	1.22394
										42.1494	1.22437
										42.1844	1.2292
										42.2194	1.22679
										42.2564	1.22368
										42.2924	1.22458
										42.3284	1.22478
										42.3624	1.22318
										42.3974	1.22405
										42.4334	1.22714
										42.4694	1.22475
										42.5064	1.22606
										42.5424	1.22336
										42.5774	1.22466
										42.6124	1.22481
										42.6484	1.22714
										42.6844	1.22687
										42.7184	1.22714
										42.7544	1.22702
										42.7894	1.22557
										42.8254	1.22373
										42.8604	1.22696
										42.8954	1.22455
										42.9304	1.22318
										42.9654	1.22222
										43.0004	1.22577
										43.0364	1.22586
										43.0715	1.22382
										43.1075	1.22725
										43.1425	1.2217
										43.1775	1.22234
										43.2135	1.22484
										43.2475	1.22368
										43.2835	1.21975
										43.3175	1.22376
										43.3535	1.22373
										43.3895	1.22498
										43.4245	1.22411
										43.4605	1.22309
										43.4945	1.22862
										43.5305	1.22911
										43.5645	1.22615
										43.5995	1.2258
										43.6355	1.22455
										43.6715	1.22382
										43.7075	1.22722
										43.7435	1.22862
										43.7775	1.22417
										43.8125	1.22464
										43.8475	1.22481
										43.8825	1.22458
										43.9195	1.22266
										43.9535	1.22304
										43.9895	1.22391
										44.0245	1.22336
										44.0595	1.22208
										44.0945	1.2237
										44.1295	1.22248
										44.1655	1.22574
										44.2015	1.22443
										44.2375	1.2267
										44.2725	1.22402
										44.3075	1.22661
										44.3425	1.22815
										44.3775	1.22714
										44.4125	1.22996
										44.4485	1.22905
										44.4845	1.22876
										44.5205	1.23022
										44.5555	1.22824
										44.5905	1.22998
										44.6255	1.22815
										44.6605	1.22984
										44.6965	1.22786
										44.7305	1.23208
										44.7665	1.22615
										44.8015	1.22495
										44.8376	1.22684
										44.8726	1.22327
										44.9076	1.22629
										44.9436	1.22504
										44.9796	1.22594
										45.0156	1.22187
										45.0506	1.22533
										45.0866	1.2267
										45.1216	1.22676
										45.1566	1.22664
										45.1916	1.22644
										45.2266	1.2242
										45.2616	1.22298
										45.2966	1.22275
										45.3326	1.22321
										45.3686	1.22115
										45.4036	1.22632
										45.4386	1.22097
										45.4736	1.22539
										45.5096	1.22094
										45.5436	1.22202
										45.5786	1.22385
										45.6156	1.22318
										45.6506	1.22088
										45.6866	1.2217
										45.7216	1.22193
										45.7556	1.21679
										45.7906	1.21789
										45.8256	1.21978
										45.8606	1.22173
										45.8976	1.21998
										45.9336	1.22202
										45.9686	1.22269
										46.0036	1.22071
										46.0386	1.22036
										46.0746	1.22164
										46.1096	1.22193
										46.1446	1.22123
										46.1806	1.22173
										46.2166	1.22402
										46.2526	1.22004
										46.2886	1.21998
										46.3236	1.21632
										46.3586	1.21998
										46.3926	1.21667
										46.4286	1.21937
										46.4646	1.21647
										46.4996	1.2208
										46.5356	1.21914
										46.5697	1.219
										46.6047	1.22222
										46.6397	1.21853
										46.6757	1.21969
										46.7137	1.21841
										46.7487	1.21815
										46.7847	1.22065
										46.8197	1.21917
										46.8537	1.2187
										46.8897	1.2215
										46.9257	1.2151
										46.9617	1.21676
										46.9977	1.22126
										47.0327	1.21818
										47.0687	1.21612
										47.1027	1.21641
										47.1377	1.21356
										47.1737	1.21292
										47.2077	1.21975
										47.2437	1.21399
										47.2787	1.21664
										47.3147	1.22243
										47.3497	1.22016
										47.3847	1.21545
										47.4207	1.21696
										47.4547	1.21929
										47.4897	1.21998
										47.5247	1.22118
										47.5607	1.22155
										47.5967	1.2208
										47.6317	1.22042
										47.6667	1.21847
										47.7017	1.22309
										47.7377	1.21309
										47.7727	1.21586
										47.8087	1.21873
										47.8447	1.21699
										47.8807	1.21809
										47.9147	1.22237
										47.9497	1.22068
										47.9847	1.22196
										48.0197	1.22074
										48.0547	1.21897
										48.0897	1.22155
										48.1257	1.21932
										48.1617	1.21995
										48.1967	1.22025
										48.2317	1.21859
										48.2667	1.21693
										48.3018	1.21809
										48.3368	1.21667
										48.3718	1.21897
										48.4088	1.21719
										48.4448	1.21786
										48.4808	1.21917
										48.5148	1.21702
										48.5498	1.21932
										48.5858	1.21914
										48.6208	1.22088
										48.6568	1.21844
										48.6918	1.22094
										48.7278	1.2235
										48.7638	1.22088
										48.7988	1.22173
										48.8338	1.22135
										48.8688	1.21844
										48.9038	1.22234
										48.9408	1.22469
										48.9768	1.22144
										49.0118	1.22007
										49.0468	1.21862
										49.0828	1.22426
										49.1178	1.21807
										49.1538	1.21908
										49.1888	1.22077
										49.2238	1.22059
										49.2598	1.219
										49.2948	1.2151
										49.3298	1.21551
										49.3648	1.21722
										49.3998	1.21908
										49.4348	1.21591
										49.4698	1.21812
										49.5058	1.2194
										49.5418	1.21658
										49.5778	1.21888
										49.6118	1.21792
										49.6478	1.21618
										49.6818	1.21493
										49.7168	1.2149
										49.7518	1.21641
										49.7868	1.21577
										49.8248	1.21644
										49.8588	1.21719
										49.8948	1.21635
										49.9298	1.2158
										49.9648	1.21539
										50.0008	1.21615
										50.0378	1.21818
										50.0739	1.21673
										50.1089	1.21809
										50.1439	1.21632
										50.1799	1.21394
										50.2149	1.21725
										50.2489	1.21833
										50.2839	1.21586
										50.3209	1.2176
										50.3569	1.21804
										50.3929	1.22054
										50.4269	1.22193
										50.4619	1.21911
										50.4979	1.22283
										50.5339	1.22327
										50.5689	1.22498
										50.6039	1.22292
										50.6399	1.22071
										50.6749	1.22205
										50.7109	1.2226
										50.7459	1.22272
										50.7799	1.22077
										50.8159	1.22007
										50.8509	1.21838
										50.8869	1.21847
										50.9219	1.21629
										50.9569	1.21905
										50.9929	1.2217
										51.0279	1.22266
										51.0629	1.22126
										51.0979	1.22161
										51.1339	1.22216
										51.1689	1.22449
										51.2049	1.22397
										51.2399	1.22196
										51.2759	1.22525
										51.3099	1.2244
										51.3449	1.22397
										51.3799	1.22359
										51.4149	1.22193
										51.4509	1.22292
										51.4869	1.22766
										51.5209	1.22574
										51.5569	1.22394
										51.5909	1.22228
										51.6259	1.22251
										51.6609	1.22205
										51.6959	1.22321
										51.7309	1.22632
										51.7669	1.22179
										51.802	1.22109
										51.838	1.22446
										51.873	1.22289
										51.908	1.21923
										51.942	1.22315
										51.978	1.21897
										52.013	1.22057
										52.05	1.21838
										52.084	1.22013
										52.12	1.22182
										52.156	1.21879
										52.19	1.22074
										52.225	1.22295
										52.26	1.21975
										52.295	1.22144
										52.331	1.22298
										52.366	1.2217
										52.402	1.22298
										52.436	1.22013
										52.471	1.22205
										52.506	1.22141
										52.541	1.22295
										52.576	1.22237
										52.611	1.22344
										52.648	1.21966
										52.683	1.21859
										52.719	1.2192
										52.753	1.21932
										52.788	1.2185
										52.823	1.221
										52.858	1.21897
										52.893	1.2226
										52.929	1.22161
										52.965	1.22187
										53.001	1.22019
										53.036	1.2215
										53.072	1.22109
										53.106	1.22333
										53.141	1.22391
										53.177	1.22339
										53.212	1.22126
										53.247	1.2224
										53.283	1.22222
										53.318	1.22123
										53.353	1.22443
										53.388	1.22164

## Sheet: Fig 3D
	Time of incubation with 500 nM RecX, s	Mean k_decompression, s-1	SD	N
	30	0.20229	0.03137	7
	100	0.15689	0.02606	6
	200	0.12813	0.0124	6
