# Supplementary material for: A new insight into RecA filament regulation by RecX from the analysis of conformation-specific interactions
Source: eLife. 2022 Jun 22;11:e78409. doi: 10.7554/eLife.78409 (PMC9252578; doi:10.7554/eLife.78409)
Supplement: Figure 4—figure supplement 1—source data 1. [file elife-78409-fig4-figsupp1-data1.xlsx]

## Sheet: 1
Time, s	Length, um
0	5.3365
0.0351	5.3447
0.0711	5.3367
0.1071	5.3379
0.1431	5.3402
0.1791	5.3349
0.2151	5.3403
0.2511	5.3405
0.2861	5.3406
0.3201	5.3431
0.3561	5.3449
0.3911	5.3394
0.4271	5.3429
0.4621	5.3431
0.4981	5.3426
0.5331	5.3439
0.5671	5.3407
0.6031	5.3443
0.6381	5.3421
0.6741	5.3442
0.7101	5.3446
0.7461	5.3379
0.7811	5.3453
0.8161	5.3443
0.8521	5.3392
0.8881	5.3406
0.9231	5.344
0.9601	5.3467
0.9971	5.3448
1.0331	5.3437
1.0681	5.341
1.1031	5.3463
1.1381	5.3446
1.1741	5.3438
1.2101	5.3448
1.2461	5.3447
1.2811	5.3408
1.3171	5.347
1.3521	5.347
1.3871	5.3448
1.4221	5.3467
1.4581	5.3453
1.4941	5.3448
1.5291	5.3416
1.5651	5.3406
1.6012	5.3455
1.6372	5.3434
1.6712	5.3414
1.7082	5.3465
1.7442	5.3376
1.7802	5.3434
1.8152	5.3432
1.8502	5.3405
1.8842	5.3415
1.9192	5.3451
1.9542	5.343
1.9912	5.3444
2.0262	5.3416
2.0612	5.3437
2.0972	5.3413
2.1322	5.3438
2.1672	5.3377
2.2032	5.3375
2.2372	5.3398
2.2742	5.336
2.3102	5.333
2.3462	5.3372
2.3812	5.3377
2.4162	5.3366
2.4502	5.3401
2.4852	5.3392
2.5212	5.3405
2.5572	5.3366
2.5932	5.3433
2.6292	5.3401
2.6642	5.342
2.6992	5.3425
2.7342	5.3472
2.7692	5.3458
2.8052	5.3443
2.8412	5.3393
2.8772	5.3461
2.9122	5.3499
2.9472	5.3472
2.9832	5.347
3.0192	5.3474
3.0552	5.3473
3.0912	5.3466
3.1262	5.35
3.1622	5.3467
3.1972	5.3511
3.2322	5.3455
3.2672	5.348
3.3042	5.3454
3.3403	5.3492
3.3763	5.3454
3.4113	5.3494
3.4463	5.351
3.4823	5.3492
3.5173	5.3507
3.5533	5.3467
3.5883	5.3463
3.6233	5.352
3.6593	5.3522
3.6933	5.349
3.7283	5.3467
3.7633	5.3479
3.7983	5.3528
3.8343	5.3493
3.8703	5.3465
3.9063	5.3485
3.9423	5.3476
3.9763	5.3496
4.0123	5.3491
4.0473	5.3525
4.0823	5.3497
4.1193	5.3478
4.1543	5.3411
4.1903	5.3462
4.2253	5.3445
4.2603	5.3465
4.2953	5.3434
4.3313	5.3446
4.3663	5.3402
4.4023	5.3414
4.4383	5.3449
4.4743	5.344
4.5103	5.3509
4.5463	5.3458
4.5803	5.3447
4.6173	5.3442
4.6513	5.3416
4.6873	5.3417
4.7233	5.3428
4.7583	5.3426
4.7923	5.3436
4.8283	5.344
4.8633	5.337
4.9003	5.341
4.9363	5.3413
4.9713	5.3449
5.0073	5.3445
5.0423	5.3419
5.0784	5.3419
5.1134	5.3428
5.1494	5.3438
5.1854	5.3461
5.2214	5.3456
5.2564	5.3439
5.2914	5.3422
5.3274	5.3494
5.3624	5.3462
5.3974	5.3479
5.4324	5.3511
5.4684	5.347
5.5044	5.3467
5.5394	5.3464
5.5744	5.3484
5.6104	5.3442
5.6454	5.3468
5.6814	5.3476
5.7174	5.3445
5.7524	5.3493
5.7884	5.3476
5.8234	5.3484
5.8574	5.3471
5.8934	5.3455
5.9294	5.3421
5.9654	5.3436
6.0014	5.3465
6.0374	5.3436
6.0714	5.3474
6.1074	5.3433
6.1424	5.3458
6.1764	5.3466
6.2134	5.3472
6.2494	5.3471
6.2854	5.3461
6.3214	5.3501
6.3564	5.3501
6.3904	5.3474
6.4264	5.3532
6.4614	5.3524
6.4974	5.3516
6.5334	5.3528
6.5684	5.3454
6.6034	5.355
6.6394	5.3527
6.6754	5.3514
6.7114	5.3477
6.7474	5.352
6.7834	5.3478
6.8194	5.3485
6.8545	5.3537
6.8885	5.3529
6.9245	5.3496
6.9615	5.3581
6.9985	5.3473
7.0335	5.35
7.0695	5.3523
7.1045	5.3478
7.1395	5.3519
7.1755	5.3495
7.2115	5.3522
7.2475	5.3505
7.2835	5.3498
7.3175	5.3501
7.3535	5.3513
7.3895	5.3502
7.4235	5.35
7.4595	5.3483
7.4955	5.3514
7.5315	5.3472
7.5675	5.3501
7.6035	5.3557
7.6385	5.3523
7.6735	5.3485
7.7095	5.3469
7.7455	5.3469
7.7805	5.3513
7.8165	5.3458
7.8515	5.3491
7.8855	5.3499
7.9215	5.3524
7.9565	5.3532
7.9925	5.3467
8.0285	5.3545
8.0645	5.3478
8.0995	5.348
8.1345	5.3482
8.1695	5.3491
8.2045	5.3471
8.2405	5.3547
8.2765	5.3492
8.3125	5.3504
8.3475	5.3492
8.3825	5.3501
8.4175	5.3536
8.4535	5.3499
8.4885	5.3487
8.5245	5.3553
8.5615	5.3507
8.5966	5.3518
8.6326	5.3477
8.6676	5.3505
8.7026	5.3469
8.7376	5.3499
8.7736	5.3483
8.8096	5.3498
8.8456	5.3478
8.8806	5.3456
8.9156	5.3502
8.9506	5.3456
8.9866	5.3478
9.0236	5.3483
9.0596	5.3479
9.0946	5.3479
9.1306	5.3473
9.1656	5.3473
9.2006	5.3463
9.2356	5.3493
9.2726	5.3439
9.3086	5.3449
9.3436	5.3472
9.3786	5.3398
9.4136	5.345
9.4486	5.3442
9.4846	5.3411
9.5196	5.3435
9.5556	5.3446
9.5926	5.3428
9.6286	5.3424
9.6636	5.3442
9.6996	5.3378
9.7346	5.3408
9.7716	5.3409
9.8076	5.3428
9.8436	5.3446
9.8786	5.3402
9.9146	5.3377
9.9496	5.3392
9.9856	5.3424
10.0216	5.3391
10.0576	5.3461
10.0936	5.3425
10.1296	5.3445
10.1646	5.3455
10.2006	5.3449
10.2366	5.3431
10.2726	5.3434
10.3076	5.343
10.3427	5.3431
10.3777	5.3411
10.4137	5.3408
10.4487	5.3444
10.4847	5.3462
10.5207	5.3434
10.5567	5.3424
10.5917	5.3417
10.6267	5.3369
10.6617	5.3431
10.6967	5.3429
10.7327	5.3448
10.7677	5.3438
10.8037	5.3439
10.8397	5.3441
10.8757	5.3437
10.9107	5.347
10.9467	5.3449
10.9817	5.346
11.0167	5.3448
11.0527	5.3449
11.0887	5.3443
11.1237	5.3434
11.1597	5.3428
11.1947	5.3397
11.2307	5.3404
11.2677	5.3392
11.3047	5.3399
11.3397	5.3439
11.3757	5.3383
11.4097	5.3433
11.4457	5.3389
11.4797	5.3386
11.5157	5.3379
11.5517	5.3428
11.5877	5.3394
11.6227	5.3358
11.6577	5.3399
11.6937	5.3416
11.7287	5.3366
11.7647	5.3455
11.8007	5.3437
11.8377	5.3427
11.8717	5.3444
11.9077	5.3435
11.9427	5.342
11.9767	5.345
12.0127	5.3434
12.0477	5.3438
12.0838	5.3329
12.1198	5.3433
12.1548	5.3492
12.1898	5.3459
12.2258	5.3449
12.2618	5.3377
12.2968	5.346
12.3328	5.3434
12.3688	5.3409
12.4048	5.3428
12.4408	5.3439
12.4768	5.3437
12.5118	5.3469
12.5488	5.3413
12.5848	5.3434
12.6208	5.3421
12.6558	5.3402
12.6898	5.3383
12.7258	5.338
12.7608	5.3365
12.7968	5.3394
12.8338	5.3375
12.8688	5.3388
12.9048	5.3347
12.9408	5.3361
12.9748	5.3351
13.0098	5.3349
13.0468	5.3346
13.0828	5.3378
13.1188	5.335
13.1528	5.3353
13.1888	5.3349
13.2228	5.3308
13.2588	5.3326
13.2938	5.336
13.3298	5.3355
13.3658	5.3369
13.4008	5.3339
13.4358	5.3326
13.4718	5.334
13.5068	5.3385
13.5418	5.3386
13.5788	5.3403
13.6148	5.3409
13.6508	5.3387
13.6868	5.3376
13.7208	5.335
13.7568	5.3353
13.7928	5.335
13.8269	5.3376
13.8639	5.3402
13.8999	5.3414
13.9349	5.3362
13.9709	5.344
14.0069	5.3466
14.0419	5.3379
14.0779	5.3439
14.1139	5.3403
14.1489	5.344
14.1849	5.3404
14.2199	5.3434
14.2549	5.3486
14.2909	5.3442
14.3279	5.3414
14.3639	5.346
14.3989	5.3458
14.4349	5.3412
14.4699	5.3425
14.5049	5.3443
14.5409	5.3448
14.5769	5.3453
14.6129	5.3425
14.6489	5.3431
14.6829	5.3435
14.7179	5.3426
14.7529	5.3419
14.7879	5.3448
14.8239	5.345
14.8599	5.3438
14.8959	5.3455
14.9319	5.3418
14.9669	5.3417
15.0019	5.3431
15.0369	5.3433
15.0719	5.3396
15.1089	5.3438
15.1449	5.344
15.1809	5.3453
15.2159	5.3443
15.2499	5.3441
15.2849	5.342
15.3209	5.3433
15.3549	5.3447
15.3919	5.3447
15.4269	5.34
15.4629	5.3428
15.4979	5.3469
15.5329	5.3462
15.567	5.3431
15.603	5.3464
15.639	5.3463
15.674	5.3487
15.71	5.3457
15.745	5.3442
15.781	5.3409
15.816	5.3438
15.851	5.3398
15.885	5.3467
15.921	5.3469
15.957	5.342
15.993	5.3437
16.029	5.3424
16.064	5.3454
16.098	5.3416
16.134	5.3483
16.17	5.3484
16.206	5.3436
16.242	5.3518
16.277	5.3438
16.312	5.3395
16.348	5.3445
16.384	5.3421
16.419	5.3442
16.455	5.3414
16.491	5.3457
16.527	5.3392
16.561	5.3403
16.597	5.3438
16.633	5.343
16.668	5.3433
16.703	5.3395
16.739	5.3388
16.775	5.3358
16.81	5.3334
16.846	5.3348
16.88	5.3371
16.916	5.3354
16.95	5.33
16.986	5.3334
17.022	5.3288
17.059	5.3334
17.094	5.3284
17.129	5.3274
17.165	5.3318
17.2	5.3369
17.235	5.3331
17.271	5.3369
17.307	5.3341
17.3421	5.3313
17.3771	5.3333
17.4131	5.3359
17.4481	5.3312
17.4821	5.3271
17.5191	5.3334
17.5541	5.336
17.5901	5.3326
17.6261	5.3255
17.6611	5.3359
17.6971	5.3336
17.7311	5.3333
17.7671	5.3343
17.8021	5.3303
17.8381	5.3331
17.8731	5.3359
17.9091	5.3326
17.9441	5.3309
17.9791	5.3323
18.0151	5.3332
18.0511	5.3346
18.0871	5.3297
18.1221	5.332
18.1571	5.3303
18.1931	5.3357
18.2281	5.3349
18.2631	5.336
18.2991	5.3312
18.3351	5.3317
18.3711	5.3307
18.4061	5.3348
18.4421	5.3303
18.4781	5.3386
18.5141	5.3335
18.5491	5.3315
18.5841	5.3313
18.6211	5.3336
18.6561	5.3361
18.6911	5.3339
18.7261	5.3319
18.7611	5.3346
18.7961	5.3296
18.8331	5.3362
18.8691	5.3372
18.9051	5.3331
18.9401	5.3355
18.9751	5.3337
19.0101	5.3341
19.0451	5.3322
19.0812	5.3327
19.1172	5.3331
19.1532	5.3384
19.1882	5.3275
19.2242	5.3364
19.2592	5.3337
19.2952	5.3376
19.3312	5.34
19.3662	5.343
19.4022	5.3302
19.4372	5.3312
19.4722	5.3355
19.5072	5.3381
19.5432	5.33
19.5792	5.326
19.6162	5.3342
19.6522	5.3283
19.6872	5.3342
19.7232	5.3313
19.7582	5.3343
19.7932	5.3324
19.8292	5.3298
19.8652	5.3303
19.9012	5.3353
19.9362	5.3326
19.9712	5.3316
20.0062	5.3362
20.0422	5.3366
20.0782	5.3327
20.1152	5.3311
20.1502	5.3332
20.1862	5.331
20.2212	5.3294
20.2552	5.3335
20.2912	5.3299
20.3272	5.3361
20.3632	5.3299
20.3992	5.3308
20.4352	5.3373
20.4712	5.3316
20.5072	5.3348
20.5422	5.3348
20.5782	5.3376
20.6142	5.3346
20.6502	5.3301
20.6842	5.325
20.7192	5.3371
20.7552	5.3374
20.7902	5.3352
20.8263	5.3406
20.8623	5.3339
20.8993	5.3371
20.9353	5.3366
20.9713	5.3337
21.0063	5.3369
21.0413	5.3332
21.0783	5.3405
21.1133	5.3419
21.1493	5.3375
21.1843	5.3378
21.2193	5.3301
21.2543	5.3399
21.2893	5.33
21.3253	5.3304
21.3613	5.329
21.3973	5.332
21.4323	5.3364
21.4683	5.3352
21.5043	5.337
21.5393	5.3375
21.5753	5.3355
21.6113	5.3344
21.6473	5.3397
21.6823	5.3361
21.7183	5.3288
21.7533	5.3322
21.7893	5.3336
21.8263	5.3331
21.8603	5.3369
21.8963	5.334
21.9313	5.3326
21.9673	5.3306
22.0023	5.3348
22.0383	5.3377
22.0743	5.3321
22.1103	5.3317
22.1463	5.329
22.1813	5.3394
22.2173	5.3353
22.2523	5.3342
22.2873	5.3324
22.3243	5.3296
22.3613	5.3393
22.3963	5.3371
22.4303	5.3335
22.4653	5.3395
22.5013	5.3448
22.5363	5.3424
22.5714	5.3395
22.6074	5.3408
22.6434	5.3446
22.6784	5.3419
22.7144	5.3423
22.7494	5.3406
22.7844	5.3437
22.8184	5.3433
22.8534	5.3464
22.8914	5.3476
22.9264	5.3477
22.9614	5.3434
22.9964	5.3456
23.0314	5.345
23.0674	5.3458
23.1034	5.3451
23.1394	5.348
23.1744	5.3468
23.2104	5.3432
23.2454	5.343
23.2814	5.3386
23.3174	5.3482
23.3524	5.3476
23.3884	5.347
23.4244	5.3428
23.4594	5.3441
23.4944	5.3468
23.5304	5.3415
23.5644	5.3402
23.6004	5.3423
23.6364	5.3435
23.6724	5.343
23.7074	5.3416
23.7434	5.3418
23.7784	5.3377
23.8124	5.3398
23.8484	5.3432
23.8834	5.3401
23.9174	5.342
23.9544	5.3391
23.9904	5.3396
24.0264	5.343
24.0614	5.3399
24.0974	5.3429
24.1324	5.342
24.1684	5.345
24.2034	5.3431
24.2394	5.3376
24.2744	5.3428
24.3105	5.341
24.3455	5.3401
24.3815	5.3419
24.4165	5.3385
24.4525	5.3423
24.4885	5.3381
24.5245	5.3406
24.5585	5.3436
24.5945	5.3394
24.6295	5.3396
24.6655	5.3379
24.7025	5.3367
24.7375	5.34
24.7735	5.3375
24.8095	5.3387
24.8445	5.3395
24.8795	5.3359
24.9145	5.34
24.9505	5.3376
24.9865	5.3381
25.0215	5.3431
25.0575	5.3361
25.0925	5.3358
25.1275	5.3375
25.1635	5.3361
25.1975	5.3393
25.2345	5.3422
25.2715	5.3383
25.3075	5.3389
25.3425	5.3425
25.3785	5.3383
25.4145	5.3434
25.4505	5.3399
25.4865	5.3398
25.5215	5.3382
25.5565	5.3461
25.5925	5.3423
25.6285	5.3408
25.6645	5.3422
25.7005	5.3448
25.7365	5.3452
25.7715	5.3453
25.8075	5.3451
25.8425	5.3467
25.8775	5.3472
25.9125	5.3462
25.9485	5.3487
25.9845	5.3474
26.0205	5.344
26.0566	5.348
26.0916	5.3491
26.1276	5.3493
26.1646	5.3471
26.2006	5.3507
26.2366	5.3515
26.2716	5.3446
26.3076	5.3466
26.3436	5.3474
26.3786	5.3438
26.4156	5.3504
26.4506	5.3463
26.4866	5.3469
26.5216	5.3477
26.5576	5.3501
26.5926	5.3457
26.6276	5.3444
26.6646	5.346
26.7016	5.347
26.7366	5.3426
26.7716	5.3462
26.8066	5.351
26.8426	5.3482
26.8786	5.3469
26.9146	5.3453
26.9506	5.3491
26.9856	5.3477
27.0206	5.3458
27.0556	5.3459
27.0906	5.3477
27.1266	5.3496
27.1636	5.3441
27.1986	5.346
27.2336	5.3485
27.2696	5.3476
27.3056	5.3451
27.3406	5.345
27.3756	5.3446
27.4126	5.3449
27.4496	5.3413
27.4846	5.3382
27.5196	5.3414
27.5546	5.3447
27.5906	5.3436
27.6256	5.3421
27.6616	5.3395
27.6976	5.3439
27.7326	5.3458
27.7686	5.3428
27.8037	5.3433
27.8397	5.3387
27.8747	5.3412
27.9107	5.3451
27.9477	5.3405
27.9827	5.3407
28.0177	5.3428
28.0527	5.3431
28.0887	5.3467
28.1237	5.3436
28.1597	5.3374
28.1967	5.3416
28.2327	5.3378
28.2687	5.3372
28.3037	5.3398
28.3397	5.3388
28.3747	5.3435
28.4107	5.3411
28.4467	5.3384
28.4817	5.345
28.5177	5.3448
28.5527	5.3403
28.5877	5.3407
28.6217	5.3401
28.6577	5.3424
28.6927	5.3449
28.7297	5.3426
28.7657	5.3421
28.8007	5.3454
28.8357	5.3405
28.8707	5.3399
28.9067	5.3423
28.9427	5.3418
28.9787	5.3416
29.0147	5.3475
29.0497	5.3438
29.0857	5.3369
29.1197	5.3373
29.1557	5.3429
29.1917	5.346
29.2277	5.3421
29.2637	5.346
29.2987	5.3384
29.3347	5.3466
29.3707	5.3426
29.4077	5.346
29.4437	5.3403
29.4797	5.3441
29.5147	5.3399
29.5498	5.3435
29.5858	5.342
29.6208	5.3467
29.6568	5.3411
29.6928	5.342
29.7288	5.3486
29.7638	5.346
29.7988	5.347
29.8338	5.3437
29.8688	5.3451
29.9048	5.346
29.9418	5.3386
29.9768	5.3425
30.0118	5.3455
30.0478	5.3442
30.0828	5.3419
30.1178	5.3443
30.1538	5.3466
30.1898	5.3445
30.2258	5.346
30.2618	5.3501
30.2968	5.3482
30.3328	5.3427
30.3678	5.3442
30.4038	5.3426
30.4398	5.3467
30.4758	5.3383
30.5118	5.3484
30.5468	5.3417
30.5818	5.3497
30.6168	5.3423
30.6528	5.3444
30.6878	5.3453
30.7238	5.342
30.7598	5.3454
30.7948	5.3438
30.8288	5.3377
30.8648	5.3435
30.9008	5.3407
30.9358	5.341
30.9718	5.3426
31.0078	5.3436
31.0428	5.3431
31.0778	5.3471
31.1138	5.3427
31.1488	5.341
31.1848	5.3411
31.2208	5.3417
31.2568	5.341
31.2929	5.3415
31.3279	5.3396
31.3639	5.3384
31.4009	5.3398
31.4369	5.3403
31.4729	5.3405
31.5099	5.3354
31.5459	5.3357
31.5809	5.3391
31.6179	5.3359
31.6539	5.3323
31.6889	5.342
31.7249	5.3376
31.7599	5.3393
31.7939	5.3394
31.8289	5.3409
31.8639	5.3412
31.9009	5.334
31.9369	5.3378
31.9719	5.339
32.0069	5.3358
32.0429	5.3391
32.0779	5.3407
32.1139	5.3357
32.1499	5.3356
32.1869	5.3312
32.2219	5.3327
32.2559	5.3319
32.2919	5.3351
32.3269	5.3351
32.3619	5.3343
32.3969	5.3391
32.4319	5.3353
32.4679	5.3347
32.5039	5.3315
32.5389	5.338
32.5749	5.3331
32.6099	5.3351
32.6459	5.3363
32.6809	5.3339
32.7169	5.3314
32.7519	5.3363
32.7869	5.3286
32.8219	5.3333
32.8579	5.3272
32.8939	5.3308
32.9289	5.3248
32.9649	5.3306
33.0009	5.3326
33.0369	5.3326
33.073	5.3296
33.108	5.3314
33.143	5.3269
33.178	5.3353
33.215	5.3333
33.251	5.3267
33.287	5.3333
33.322	5.3381
33.356	5.3318
33.392	5.3321
33.428	5.3382
33.464	5.335
33.5	5.3355
33.535	5.3268
33.57	5.3362
33.606	5.3329
33.641	5.327
33.677	5.3294
33.714	5.3314
33.75	5.3328
33.785	5.3251
33.821	5.3308
33.856	5.3357
33.892	5.3334
33.927	5.3316
33.964	5.3325
33.999	5.3323
34.034	5.334
34.07	5.3354
34.106	5.3379
34.14	5.3409
34.176	5.3375
34.212	5.3381
34.247	5.3423
34.283	5.3366
34.319	5.3378
34.354	5.3344
34.39	5.3374
34.426	5.3369
34.462	5.3345
34.498	5.3368
34.534	5.3397
34.57	5.3402
34.605	5.3327
34.64	5.3368
34.675	5.3364
34.711	5.3359
34.748	5.3393
34.784	5.3378
34.8191	5.3367
34.8551	5.3295
34.8901	5.3337
34.9271	5.3316
34.9631	5.3298
34.9991	5.3357
35.0341	5.3348
35.0701	5.3362
35.1051	5.3361
35.1411	5.3326
35.1771	5.3315
35.2121	5.3301
35.2471	5.335
35.2831	5.3347
35.3181	5.3335
35.3531	5.3337
35.3881	5.3234
35.4241	5.3316
35.4601	5.3239
35.4961	5.3303
35.5321	5.3296
35.5681	5.3279
35.6051	5.3299
35.6391	5.3203
35.6761	5.3277
35.7121	5.327
35.7481	5.3246
35.7831	5.3315
35.8191	5.3234
35.8551	5.3244
35.8901	5.332
35.9261	5.3274
35.9621	5.3205
35.9971	5.3309
36.0331	5.3308
36.0671	5.3295
36.1031	5.3283
36.1381	5.3284
36.1741	5.3303
36.2101	5.3344
36.2451	5.3311
36.2811	5.3341
36.3171	5.3347
36.3511	5.3377
36.3871	5.3373
36.4221	5.335
36.4581	5.3369
36.4941	5.3398
36.5291	5.3385
36.5652	5.3352
36.6012	5.3396
36.6362	5.3342
36.6732	5.3348
36.7092	5.3366
36.7452	5.3373
36.7792	5.3405
36.8142	5.3319
36.8492	5.3462
36.8852	5.329
36.9202	5.3361
36.9562	5.3359
36.9922	5.3368
37.0282	5.336
37.0642	5.3394
37.1002	5.3401
37.1352	5.3378
37.1722	5.3358
37.2082	5.3452
37.2432	5.3345
37.2792	5.34
37.3152	5.3347
37.3502	5.3352
37.3862	5.3355
37.4222	5.3358
37.4582	5.3331
37.4942	5.3401
37.5302	5.3449
37.5662	5.339
37.6022	5.3388
37.6382	5.3423
37.6732	5.342
37.7092	5.343
37.7442	5.3403
37.7792	5.3468
37.8152	5.3408
37.8512	5.3414
37.8882	5.3438
37.9242	5.3475
37.9602	5.3444
37.9952	5.3459
38.0312	5.3467
38.0662	5.3445
38.1012	5.3462
38.1372	5.347
38.1742	5.3499
38.2082	5.3455
38.2432	5.3523
38.2792	5.3458
38.3153	5.3482
38.3513	5.3462
38.3873	5.3509
38.4223	5.3495
38.4573	5.3485
38.4923	5.3507
38.5283	5.3507
38.5643	5.3479
38.5993	5.3435
38.6363	5.3523
38.6723	5.3508
38.7063	5.3543
38.7423	5.35
38.7773	5.3523
38.8133	5.347
38.8493	5.3499
38.8863	5.3522
38.9213	5.3482
38.9563	5.3541
38.9913	5.3524
39.0273	5.347
39.0633	5.3439
39.0983	5.3506
39.1343	5.3447
39.1693	5.3494
39.2053	5.3551
39.2403	5.3506
39.2753	5.3488
39.3103	5.3494
39.3463	5.3486
39.3813	5.3447
39.4173	5.35
39.4543	5.3428
39.4893	5.346
39.5243	5.349
39.5593	5.3516
39.5953	5.3457
39.6313	5.3481
39.6673	5.3495
39.7033	5.3458
39.7383	5.3474
39.7743	5.3441
39.8093	5.3457
39.8443	5.3445
39.8803	5.3435
39.9163	5.3428
39.9533	5.3428
39.9883	5.3448
40.0233	5.3451
40.0584	5.3418
40.0944	5.3423
40.1284	5.3407
40.1644	5.3393
40.2004	5.3371
40.2354	5.3401
40.2714	5.3362
40.3054	5.3412
40.3404	5.3417
40.3754	5.3388
40.4114	5.3344
40.4474	5.3377
40.4844	5.3384
40.5204	5.3408
40.5564	5.3385
40.5924	5.3368
40.6274	5.3365
40.6634	5.3394
40.7004	5.3319
40.7354	5.3363
40.7714	5.335
40.8054	5.3308
40.8404	5.3337
40.8764	5.3354
40.9134	5.3361
40.9484	5.3351
40.9844	5.3315
41.0194	5.3338
41.0544	5.3312
41.0894	5.3332
41.1234	5.3382
41.1584	5.3292
41.1944	5.3338
41.2314	5.3392
41.2654	5.3371
41.3014	5.3316
41.3364	5.3379
41.3714	5.3317
41.4064	5.3299
41.4414	5.3317
41.4784	5.3344
41.5144	5.3339
41.5504	5.3326
41.5864	5.3316
41.6224	5.3366
41.6574	5.335
41.6944	5.3342
41.7304	5.34
41.7654	5.3328
41.8015	5.336
41.8375	5.3332
41.8715	5.3385
41.9075	5.3334
41.9435	5.3336
41.9795	5.3372
42.0155	5.3375
42.0515	5.336
42.0875	5.3331
42.1235	5.3315
42.1585	5.3347
42.1945	5.3346
42.2305	5.3324
42.2655	5.333
42.3015	5.3331
42.3365	5.3354
42.3715	5.3328
42.4075	5.3335
42.4435	5.335
42.4795	5.3353
42.5155	5.3362
42.5515	5.3413
42.5865	5.3341
42.6225	5.3395
42.6585	5.3382
42.6955	5.3387
42.7315	5.3415
42.7665	5.3427
42.8015	5.3386
42.8355	5.3421
42.8705	5.3416
42.9075	5.345
42.9435	5.3429
42.9785	5.3426
43.0145	5.3442
43.0495	5.3447
43.0855	5.3407
43.1215	5.347
43.1565	5.3445
43.1915	5.3404
43.2275	5.3438
43.2635	5.3476
43.2985	5.3519
43.3335	5.3467
43.3695	5.3492
43.4055	5.3415
43.4405	5.3502
43.4765	5.3435
43.5125	5.3442
43.5486	5.3477
43.5846	5.3457
43.6206	5.3445
43.6566	5.3475
43.6926	5.347
43.7276	5.3471
43.7646	5.3475
43.8006	5.3449
43.8356	5.3452
43.8736	5.3478
43.9086	5.3447
43.9446	5.3479
43.9806	5.3462
44.0156	5.3463
44.0506	5.3483
44.0856	5.3467
44.1216	5.3493
44.1576	5.3504
44.1936	5.3473
44.2286	5.3437
44.2626	5.3453
44.2986	5.3395
44.3346	5.3473
44.3716	5.3459
44.4076	5.3507
44.4426	5.346
44.4776	5.3413
44.5126	5.3444
44.5486	5.3479
44.5846	5.3462
44.6216	5.3399
44.6576	5.3446
44.6916	5.3437
44.7276	5.3474
44.7626	5.3417
44.7986	5.3396
44.8336	5.3434
44.8706	5.3435
44.9066	5.3408
44.9426	5.345
44.9776	5.3458
45.0126	5.3371
45.0486	5.342
45.0826	5.3391
45.1196	5.3392
45.1546	5.3414
45.1906	5.3412
45.2266	5.342
45.2616	5.3382
45.2997	5.3363
45.3387	5.3432
45.3747	5.3375
45.4107	5.339
45.4467	5.3398
45.4807	5.3413
45.5167	5.3412
45.5547	5.3385
45.5907	5.3393
45.6267	5.3431
45.6627	5.3334
45.6977	5.3381
45.7357	5.3406
45.7727	5.3346
45.8097	5.337
45.8477	5.3368
45.8847	5.3352
45.9197	5.3348
45.9547	5.3366
45.9907	5.3371
46.0257	5.326
46.0607	5.3354
46.0957	5.3299
46.1327	5.339
46.1687	5.3341
46.2047	5.3307
46.2407	5.3365
46.2757	5.3337
46.3097	5.3324
46.3457	5.3335
46.3807	5.3309
46.4167	5.3321
46.4527	5.3275
46.4877	5.3309
46.5227	5.3316
46.5577	5.3363
46.5937	5.3342
46.6287	5.3285
46.6637	5.3352
46.7017	5.332
46.7377	5.3357
46.7717	5.33
46.8077	5.3339
46.8437	5.3289
46.8787	5.3345
46.9157	5.3338
46.9517	5.3323
46.9867	5.3326
47.0217	5.3347
47.0578	5.3352
47.0938	5.3372
47.1278	5.3368
47.1628	5.3345
47.1988	5.3335
47.2348	5.3388
47.2708	5.3339
47.3058	5.3381
47.3418	5.3389
47.3768	5.3405
47.4168	5.3397
47.4528	5.3362
47.4888	5.3389
47.5258	5.3402
47.5638	5.3373
47.6008	5.3395
47.6368	5.3405
47.6728	5.3335
47.7088	5.3393
47.7448	5.3378
47.7808	5.3438
47.8178	5.3418
47.8538	5.3417
47.8878	5.3429
47.9228	5.3378
47.9588	5.3375
47.9938	5.3431
48.0298	5.3397
48.0658	5.3382
48.1008	5.3423
48.1358	5.3358
48.1718	5.3344
48.2078	5.3364
48.2448	5.3378
48.2818	5.3395
48.3188	5.337
48.3538	5.3392
48.3898	5.333
48.4248	5.3366
48.4618	5.3318
48.4988	5.3376
48.5348	5.335
48.5708	5.3369
48.6088	5.3395
48.6478	5.337
48.6848	5.3328
48.7228	5.3379
48.7608	5.34
48.7979	5.3358
48.8339	5.3375
48.8689	5.3356
48.9049	5.3428
48.9409	5.3416
48.9769	5.3416
49.0129	5.3389
49.0489	5.3417
49.0839	5.3436
49.1189	5.3414
49.1549	5.3421
49.1909	5.3388
49.2259	5.3439
49.2629	5.3435
49.2979	5.3437
49.3339	5.3468
49.3709	5.3425
49.4069	5.3397
49.4429	5.3437
49.4799	5.3436
49.5159	5.3448
49.5519	5.3433
49.5879	5.344
49.6239	5.3459
49.6599	5.3423
49.6959	5.3444
49.7319	5.3433
49.7689	5.3467
49.8039	5.3408
49.8379	5.3424
49.8749	5.3475
49.9099	5.3415
49.9459	5.3408
49.9809	5.3452
50.0159	5.342
50.0509	5.3425
50.0859	5.3441
50.1209	5.3452
50.1569	5.3434
50.1929	5.3383
50.2279	5.3314
50.2639	5.3366
50.2999	5.3347
50.3339	5.3354
50.3699	5.3295
50.4049	5.3228
50.4409	5.3247
50.4769	5.3223
50.5119	5.3247
50.548	5.3209
50.584	5.3259
50.619	5.322
50.656	5.3207
50.693	5.3203
50.728	5.3202
50.763	5.3114
50.799	5.3158
50.834	5.3094
50.87	5.3086
50.906	5.2967
50.942	5.3066
50.978	5.3128
51.014	5.3106
51.05	5.3153
51.085	5.321
51.122	5.3241
51.159	5.3225
51.195	5.3155
51.231	5.3193
51.267	5.3093
51.301	5.316
51.338	5.31
51.374	5.3116
51.41	5.3199
51.446	5.3126
51.482	5.3114
51.517	5.3252
51.553	5.3082
51.589	5.3166
51.625	5.3145
51.662	5.3134
51.697	5.3122
51.733	5.3057
51.769	5.3093
51.806	5.3098
51.841	5.3072
51.876	5.3045
51.912	5.3062
51.947	5.309
51.982	5.3085
52.017	5.3108
52.053	5.3082
52.089	5.3035
52.125	5.3004
52.16	5.3043
52.195	5.3054
52.23	5.3045
52.265	5.3003
52.3031	5.2974
52.3391	5.299
52.3741	5.2953
52.4101	5.2957
52.4461	5.2982
52.4821	5.3
52.5181	5.2965
52.5541	5.2948
52.5891	5.2995
52.6251	5.2963
52.6611	5.288
52.6961	5.295
52.7331	5.288
52.7691	5.299
52.8051	5.2899
52.8401	5.301
52.8761	5.2962
52.9111	5.3033
52.9471	5.298
52.9831	5.2955
53.0191	5.2975
53.0541	5.301
53.0901	5.2911
53.1261	5.2965
53.1611	5.2926
53.1961	5.3001
53.2331	5.2999
53.2691	5.3055
53.3051	5.308
53.3411	5.3083
53.3761	5.3025
53.4121	5.3103
53.4471	5.3032
53.4831	5.3086
53.5201	5.3051
53.5561	5.3177
53.5911	5.3126
53.6271	5.3196
53.6631	5.3203
53.6991	5.3175
53.7351	5.3222
53.7701	5.3197
53.8061	5.3195
53.8421	5.3232
53.8771	5.3164
53.9141	5.3181
53.9501	5.3228
53.9861	5.3154
54.0211	5.3094
54.0572	5.3138
54.0922	5.3181
54.1272	5.319
54.1642	5.3233
54.2002	5.3253
54.2362	5.3243
54.2722	5.3176
54.3072	5.3216
54.3432	5.3259
54.3782	5.3236
54.4142	5.3287
54.4502	5.3281
54.4852	5.3296
54.5202	5.3294
54.5552	5.333
54.5912	5.3292
54.6262	5.3217
54.6632	5.3273
54.6992	5.3319
54.7352	5.3351
54.7712	5.3334
54.8062	5.3339
54.8412	5.3383
54.8772	5.3351
54.9132	5.3298
54.9492	5.3293
54.9852	5.3369
55.0212	5.3331
55.0562	5.3357
55.0902	5.3359
55.1262	5.3402
55.1632	5.3361
55.3012	5.3336
55.3372	5.3294
55.3722	5.3298
55.4082	5.3275
55.4442	5.3258
55.4802	5.3282
55.5152	5.3267
55.5502	5.3252
55.5852	5.3262
55.6212	5.3319
55.6562	5.3284
55.6922	5.3231
55.7282	5.3275
55.7642	5.3215
55.8003	5.3245
55.8353	5.3223
55.8713	5.3206
55.9073	5.3241
55.9433	5.3221
55.9793	5.3205
56.0153	5.3227
56.0513	5.3211
56.0863	5.3218
56.1223	5.3217
56.1573	5.321
56.1933	5.3214
56.2293	5.3205
56.2653	5.3241
56.3003	5.3253
56.3353	5.3214
56.3713	5.3187
56.4063	5.3188
56.4423	5.3204
56.4793	5.3178
56.5143	5.3219
56.5483	5.3141
56.5843	5.3234
56.6203	5.3204
56.6553	5.3293
56.6923	5.3187
56.7273	5.3195
56.7633	5.317
56.7983	5.3174
56.8333	5.3205
56.8683	5.3206
56.9053	5.3148
56.9413	5.3185
56.9773	5.322
57.0133	5.3212
57.0483	5.3149
57.0843	5.3157
57.1203	5.3191
57.1563	5.3179
57.1913	5.3214
57.2273	5.3176
57.2633	5.3154
57.2983	5.3256
57.3343	5.3208
57.3693	5.3226
57.4073	5.3215
57.4433	5.3191
57.4783	5.3168
57.5133	5.3193
57.5494	5.3186
57.5844	5.3192
57.6194	5.3145
57.6554	5.3168
57.6914	5.3162
57.7264	5.3163
57.7614	5.3143
57.7974	5.3101
57.8334	5.3146
57.8684	5.3224
57.9054	5.3202
57.9424	5.3223
57.9774	5.3212
58.0134	5.3139
58.0484	5.316
58.0844	5.3145
58.1204	5.3136
58.1564	5.3179
58.1924	5.3193
58.2284	5.3191
58.2634	5.3196
58.2994	5.3168
58.3344	5.3135
58.3714	5.3174
58.4074	5.3147
58.4424	5.3207
58.4784	5.3215
58.5134	5.3235
58.5494	5.3167
58.5844	5.3147
58.6204	5.3203
58.6564	5.3215
58.6914	5.3251
58.7274	5.3135
58.7634	5.3106
58.7984	5.3139
58.8334	5.3165
58.8684	5.3178
58.9054	5.319
58.9404	5.3226
58.9764	5.3262
59.0124	5.3265
59.0474	5.3263
59.0834	5.3223
59.1194	5.3251
59.1554	5.3207
59.1904	5.3242
59.2254	5.3295
59.2614	5.3209
59.2955	5.3217
59.3305	5.3196
59.3675	5.3197
59.4035	5.3187
59.4395	5.3222
59.4755	5.3214
59.5105	5.3138
59.5465	5.3233
59.5815	5.3198
59.6185	5.3249
59.6545	5.324
59.6895	5.3202
59.7245	5.318
59.7605	5.3194
59.7955	5.3192
59.8315	5.3229
59.8685	5.3182
59.9045	5.3184
59.9405	5.3197
59.9765	5.3207
60.0125	5.3218
60.0495	5.3169
60.0855	5.3155
60.1205	5.3168
60.1565	5.315
60.1915	5.3126
60.2265	5.3186
60.2625	5.312
60.2975	5.3192
60.3335	5.3214
60.3695	5.314
60.4045	5.316
60.4405	5.3215
60.4745	5.3129
60.5105	5.322
60.5445	5.3172
60.5805	5.3187
60.6165	5.3151
60.6525	5.3194
60.6885	5.3223
60.7235	5.3192
60.7585	5.3198
60.7945	5.3186
60.8285	5.3202
60.8675	5.3201
60.9035	5.3196
60.9395	5.3124
60.9745	5.3143
61.0105	5.3146
61.0456	5.3201
61.0816	5.3193
61.1186	5.3243
61.1536	5.3208
61.1896	5.3242
61.2246	5.3203
61.2596	5.3289
61.2946	5.3311
61.3306	5.3229
61.3666	5.3323
61.4026	5.3309
61.4386	5.3263
61.4736	5.3274
61.5086	5.3247
61.5436	5.3234
61.5796	5.3304
61.6156	5.3279
61.6516	5.325
61.6876	5.3266
61.7226	5.3245
61.7596	5.321
61.7956	5.3252
61.8316	5.3192
61.8666	5.3231
61.9026	5.3255
61.9366	5.3186
61.9726	5.3178
62.0076	5.3194
62.0436	5.3232
62.0816	5.3229
62.1166	5.3231
62.1526	5.3183
62.1876	5.3254
62.2236	5.3279
62.2586	5.3271
62.2946	5.3295
62.3316	5.3274
62.3666	5.326
62.4016	5.3305
62.4376	5.33
62.4726	5.3318
62.5086	5.3295
62.5446	5.326
62.5806	5.3272
62.6166	5.3265
62.6516	5.3269
62.6866	5.3274
62.7226	5.3254
62.7576	5.328
62.7937	5.3269
62.8297	5.3218
62.8657	5.3265
62.9007	5.3223
62.9367	5.3185
62.9727	5.3279
63.0077	5.3225
63.0437	5.3252
63.0787	5.3255
63.1147	5.3301
63.1497	5.3328
63.1857	5.3318
63.2207	5.327
63.2547	5.3307
63.2917	5.3261
63.3287	5.3223
63.3647	5.3229
63.3997	5.3238
63.4347	5.3239
63.4707	5.3234
63.5057	5.3208
63.5407	5.3271
63.5767	5.3244
63.6127	5.331
63.6487	5.3272
63.6827	5.3287
63.7187	5.3265
63.7537	5.3269
63.7907	5.328
63.8267	5.322
63.8627	5.3296
63.8977	5.3286
63.9327	5.3285
63.9687	5.3281
64.0037	5.3331
64.0407	5.3265
64.0767	5.3286
64.1127	5.3303
64.1487	5.3334
64.1847	5.3301
64.2207	5.3341
64.2557	5.3256
64.2927	5.3303
64.3287	5.3265
64.3637	5.3328
64.3997	5.3373
64.4347	5.3287
64.4697	5.3304
64.5057	5.3316
64.5418	5.3276
64.5778	5.33
64.6128	5.3276
64.6488	5.3264
64.6838	5.3298
64.7198	5.3326
64.7558	5.3287
64.7918	5.3315
64.8278	5.3278
64.8638	5.3321
64.8988	5.3335
64.9348	5.3287
64.9718	5.3205
65.0078	5.3298
65.0438	5.3231
65.0798	5.3266
65.1148	5.3225
65.1508	5.3251
65.1858	5.3229
65.2218	5.3285
65.2578	5.32
65.2928	5.3199
65.3278	5.3244
65.3628	5.3231
65.3988	5.3286
65.4348	5.33
65.4708	5.3315
65.5058	5.3242
65.5408	5.335
65.5768	5.3305
65.6118	5.3266
65.6478	5.3338
65.6828	5.3256
65.7178	5.3303
65.7538	5.3239
65.7898	5.3251
65.8258	5.3272
65.8608	5.3278
65.8958	5.3278
65.9308	5.3236
65.9648	5.3286
66.0018	5.327
66.0378	5.3286
66.0738	5.325
66.1098	5.3274
66.1448	5.3221
66.1788	5.3238
66.2148	5.322
66.2518	5.3249
66.2889	5.323
66.3249	5.3228
66.3599	5.3195
66.3949	5.3236
66.4299	5.3246
66.4659	5.3267
66.5019	5.3255
66.5379	5.3203
66.5739	5.3268
66.6099	5.324
66.6449	5.3255
66.6799	5.3271
66.7139	5.3201
66.7509	5.3209
66.7859	5.3157
66.8219	5.3236
66.8569	5.3211
66.8929	5.3239
66.9279	5.3219
66.9639	5.3201
66.9999	5.3206
67.0359	5.3247
67.0709	5.3265
67.1059	5.3258
67.1419	5.3253
67.1769	5.3196
67.2119	5.3203
67.2489	5.3237
67.2849	5.3249
67.3209	5.3211
67.3549	5.3221
67.3909	5.3213
67.4259	5.322
67.4599	5.3239
67.4959	5.3238
67.5319	5.3271
67.5679	5.319
67.6029	5.324
67.6389	5.3273
67.6749	5.3231
67.7089	5.3214
67.7439	5.3192
67.7809	5.327
67.8169	5.3266
67.8529	5.3248
67.8879	5.3213
67.9229	5.3255
67.9579	5.3234
67.9939	5.3243
68.029	5.3268
68.065	5.324
68.101	5.3309
68.136	5.3321
68.172	5.324
68.208	5.3262
68.243	5.325
68.279	5.3274
68.317	5.3279
68.352	5.3308
68.388	5.3283
68.424	5.3295
68.459	5.3273
68.497	5.3239
68.533	5.3292
68.568	5.3305
68.604	5.3261
68.639	5.3302
68.674	5.3325
68.709	5.3298
68.745	5.3311
68.78	5.3331
68.816	5.33
68.852	5.3304
68.887	5.3291
68.923	5.3357
68.959	5.3324
68.995	5.3304
69.031	5.3274
69.067	5.332
69.101	5.3305
69.137	5.3345
69.171	5.3342
69.207	5.3292
69.243	5.3352
69.279	5.3334
69.315	5.3336
69.35	5.3382
69.385	5.3345
69.421	5.3402
69.457	5.337
69.493	5.334
69.529	5.3338
69.564	5.3363
69.6	5.3397
69.635	5.3354
69.67	5.3361
69.706	5.3345
69.74	5.3332
69.7761	5.3334
69.8121	5.3377
69.8481	5.3304
69.8841	5.3273
69.9201	5.3261
69.9551	5.3275
69.9911	5.3285
70.0271	5.3306
70.0631	5.3297
70.0991	5.3248
70.1341	5.3273
70.1691	5.3232
70.2041	5.3237
70.2401	5.3226
70.2771	5.3224
70.3131	5.3295
70.3491	5.3257
70.3841	5.3234
70.4201	5.3212
70.4541	5.3198
70.4911	5.3265
70.5281	5.3287
70.5641	5.3271
70.6001	5.3241
70.6351	5.3215
70.6701	5.3234
70.7051	5.3246
70.7411	5.3195
70.7781	5.3172
70.8141	5.3289
70.8501	5.3257
70.8861	5.3216
70.9231	5.3283
70.9601	5.327
70.9951	5.3244
71.0301	5.3241
71.0661	5.3238
71.1011	5.3274
71.1351	5.3268
71.1711	5.3259
71.2071	5.3311
71.2441	5.3267
71.2791	5.3293
71.3151	5.325
[truncated: 6,400 more rows]
