# Supplementary material for: A new insight into RecA filament regulation by RecX from the analysis of conformation-specific interactions
Source: eLife. 2022 Jun 22;11:e78409. doi: 10.7554/eLife.78409 (PMC9252578; doi:10.7554/eLife.78409)
Supplement: Figure 4—source data 1. [file elife-78409-fig4-data1.xlsx]

## Sheet: Fig 4A
Time	RecA	SD		RecA, RecX	SD		RecA, RecXmNG	SD
0	0	0		0	0		0	0
1	0.0413	0.00057492		0.035	0.00238145		0.0328	0.00265745
2	0.0842	0.00157151		0.0684	0.00346221		0.0625	0.00529003
3	0.127	0.00245881		0.0991	0.00440145		0.0888	0.00741624
4	0.172	0.00370041		0.127	0.0053196		0.112	0.00937605
5	0.216	0.00539011		0.153	0.00629543		0.132	0.0115203
6	0.261	0.00653768		0.176	0.00713757		0.151	0.0133642
7	0.306	0.00800764		0.197	0.00776591		0.168	0.0150364
8	0.351	0.00956444		0.216	0.00833304		0.184	0.0168405
9	0.396	0.0110824		0.234	0.00929296		0.199	0.0182471
10	0.44	0.0126529		0.25	0.00990961		0.214	0.0200277

## Sheet: Fig 4B
			no incubation with RecX_mNG			100 s incubation with 500 nM RecX_mNG
		Time, s	Extension L/L0		Time, s	Extension L/L0
		0	1		0	1
		0.035	1.00142		0.036	0.9995
		0.07	1.00743		0.071	1.00187
		0.105	1.01116		0.105	1.00234
		0.141	1.01744		0.139	1.00297
		0.177	1.02223		0.174	1.00068
		0.211	1.03071		0.209	1.00387
		0.246	1.03244		0.243	1.00513
		0.281	1.03594		0.278	1.00534
		0.316	1.04602		0.314	1.00679
		0.351	1.04888		0.35	1.00518
		0.386	1.05506		0.385	1.00655
		0.421	1.05687		0.42	1.00874
		0.456	1.06037		0.455	1.00979
		0.49	1.06683		0.49	1.00739
		0.526	1.07208		0.524	1.00768
		0.56	1.07464		0.559	1.01074
		0.595	1.07409		0.594	1.01387
		0.631	1.08113		0.63	1.01566
		0.665	1.0897		0.665	1.01253
		0.7	1.09654		0.7	1.01287
		0.734	1.1006		0.735	1.01674
		0.769	1.10361		0.77	1.01484
		0.806	1.10789		0.805	1.01847
		0.842	1.11568		0.839	1.018
		0.877	1.11874		0.873	1.02361
		0.912	1.12411		0.908	1.02358
		0.947	1.12586		0.943	1.02913
		0.981	1.1307		0.978	1.03076
		1.016	1.12942		1.013	1.03103
		1.051	1.13399		1.048	1.03295
		1.086	1.13666		1.083	1.03482
		1.122	1.13877		1.118	1.03439
		1.157	1.14044		1.153	1.03582
		1.191	1.14486		1.187	1.03742
		1.226	1.15079		1.222	1.03889
		1.261	1.15672		1.257	1.03945
		1.296	1.15677		1.2921	1.04013
		1.331	1.16348		1.3271	1.04471
		1.366	1.16122		1.3621	1.04292
		1.401	1.16723		1.3971	1.04279
		1.437	1.17021		1.4321	1.04576
		1.472	1.17113		1.4671	1.04668
		1.508	1.17177		1.5021	1.04861
		1.542	1.1755		1.5371	1.04626
		1.577	1.17288		1.5711	1.04829
		1.612	1.177		1.6061	1.0495
		1.647	1.18089		1.6411	1.05058
		1.682	1.18615		1.6761	1.05042
		1.7161	1.18804		1.7121	1.05155
		1.7511	1.18579		1.7461	1.05376
		1.7871	1.18929		1.7821	1.05553
		1.8221	1.19099		1.8161	1.05505
		1.8571	1.19138		1.8511	1.0575
		1.8921	1.19491		1.8861	1.0595
		1.9271	1.19658		1.9211	1.05682
		1.9621	1.20098		1.9551	1.0605
		1.9971	1.20268		1.9901	1.06274
		2.0321	1.20215		2.0251	1.06316
		2.0671	1.20404		2.0611	1.06305
		2.1031	1.20376		2.0961	1.06429
		2.1391	1.20518		2.1301	1.06413
		2.1741	1.20538		2.1651	1.06642
		2.2091	1.21002		2.2001	1.06653
		2.2431	1.20852		2.2351	1.07147
		2.2781	1.20774		2.2701	1.07279
		2.3131	1.20988		2.3051	1.07521
		2.3481	1.20977		2.3401	1.07905
		2.3821	1.21414		2.3761	1.07592
		2.4171	1.21525		2.4111	1.07368
		2.4521	1.21278		2.4461	1.07595
		2.4881	1.21801		2.4811	1.07766
		2.5221	1.22171		2.5161	1.07574
		2.5571	1.22287		2.5511	1.07584
		2.5921	1.22507		2.5861	1.07766
		2.6271	1.22415		2.6211	1.07971
		2.6621	1.2239		2.6551	1.08134
		2.6971	1.22479		2.6901	1.08011
		2.7311	1.2268		2.7261	1.08316
		2.7671	1.22911		2.7611	1.08203
		2.8031	1.2303		2.7961	1.08468
		2.8381	1.23061		2.8311	1.08305
		2.8721	1.23336		2.8661	1.08695
		2.9071	1.23228		2.9011	1.08579
		2.9421	1.23336		2.9361	1.089
		2.9761	1.23183		2.9701	1.09084
		3.0111	1.23103		3.0051	1.08776
		3.0461	1.23322		3.0392	1.08958
		3.0811	1.23281		3.0742	1.09218
		3.1171	1.23481		3.1092	1.09216
		3.1521	1.23206		3.1442	1.09297
		3.1871	1.23651		3.1792	1.09484
		3.2211	1.23667		3.2132	1.09239
		3.2561	1.23539		3.2482	1.09476
		3.2901	1.23525		3.2832	1.09608
		3.3251	1.23353		3.3182	1.09821
		3.3601	1.23295		3.3532	1.10008
		3.3951	1.23564		3.3882	1.09861
		3.4301	1.23448		3.4232	1.10376
		3.4662	1.23937		3.4582	1.10395
		3.5022	1.23809		3.4932	1.10395
		3.5362	1.23545		3.5282	1.10345
		3.5712	1.23411		3.5622	1.10913
		3.6062	1.23804		3.5972	1.11039
		3.6412	1.23445		3.6312	1.11021
		3.6762	1.23759		3.6662	1.11089
		3.7112	1.23439		3.7012	1.11076
		3.7462	1.23564		3.7362	1.11411
		3.7822	1.23509		3.7722	1.11084
		3.8182	1.23428		3.8072	1.1185
		3.8522	1.23562		3.8432	1.11421
		3.8862	1.23428		3.8772	1.11329
		3.9212	1.23562		3.9122	1.11987
		3.9562	1.2357		3.9462	1.11789
		3.9912	1.23331		3.9812	1.11997
		4.0262	1.23751		4.0162	1.11942
		4.0612	1.23559		4.0502	1.11905
		4.0972	1.23506		4.0852	1.12116
		4.1322	1.23642		4.1192	1.12187
		4.1672	1.23623		4.1552	1.12132
		4.2022	1.23765		4.1912	1.11876
		4.2362	1.23506		4.2262	1.12074
		4.2712	1.23217		4.2602	1.12247
		4.3062	1.23339		4.2952	1.12497
		4.3402	1.2327		4.3302	1.12211
		4.3752	1.233		4.3652	1.12439
		4.4102	1.23044		4.4002	1.12863
		4.4452	1.23281		4.4352	1.12992
		4.4802	1.23434		4.4692	1.12782
		4.5152	1.23334		4.5042	1.13053
		4.5502	1.23406		4.5392	1.12832
		4.5852	1.23464		4.5742	1.12987
		4.6202	1.23217		4.6092	1.12647
		4.6552	1.23662		4.6442	1.13032
		4.6902	1.23564		4.6792	1.13097
		4.7252	1.23411		4.7142	1.12918
		4.7602	1.23498		4.7492	1.13271
		4.7962	1.23539		4.7843	1.13289
		4.8312	1.23445		4.8203	1.13495
		4.8662	1.23584		4.8553	1.13224
		4.9012	1.23653		4.8913	1.13461
		4.9362	1.234		4.9253	1.13405
		4.9712	1.23105		4.9603	1.13334
		5.0062	1.23292		4.9953	1.13424
		5.0412	1.23448		5.0293	1.13316
		5.0762	1.23272		5.0643	1.13558
		5.1102	1.23584		5.0983	1.13561
		5.1462	1.23534		5.1333	1.13934
		5.1822	1.23428		5.1693	1.13626
		5.2173	1.23651		5.2043	1.13729
		5.2523	1.23503		5.2393	1.13537
		5.2863	1.23553		5.2743	1.14189
		5.3213	1.23531		5.3093	1.14103
		5.3563	1.23228		5.3443	1.14334
		5.3913	1.23264		5.3793	1.13879
		5.4253	1.23731		5.4143	1.14037
		5.4613	1.23776		5.4493	1.14242
		5.4973	1.2374		5.4853	1.14329
		5.5313	1.23773		5.5203	1.14463
		5.5663	1.23901		5.5563	1.14771
		5.6013	1.23946		5.5913	1.14863
		5.6363	1.23837		5.6253	1.14439
		5.6713	1.23701		5.6603	1.14682
		5.7063	1.2389		5.6953	1.14789
		5.7413	1.23737		5.7303	1.14932
		5.7773	1.23709		5.7653	1.14842
		5.8123	1.23793		5.8013	1.1495
		5.8473	1.23904		5.8363	1.14803
		5.8823	1.23954		5.8713	1.14884
		5.9163	1.24018		5.9063	1.15076
		5.9513	1.23795		5.9413	1.14776
		5.9853	1.24049		5.9753	1.15058
		6.0203	1.24018		6.0103	1.15134
		6.0553	1.2369		6.0453	1.15418
		6.0903	1.23564		6.0803	1.15147
		6.1253	1.23645		6.1153	1.15468
		6.1603	1.23973		6.1503	1.15674
		6.1953	1.23731		6.1853	1.15213
		6.2303	1.23951		6.2203	1.15484
		6.2653	1.23806		6.2553	1.15853
		6.2993	1.24051		6.2903	1.15853
		6.3343	1.2384		6.3253	1.15842
		6.3693	1.23623		6.3603	1.15524
		6.4043	1.24138		6.3953	1.16113
		6.4393	1.24101		6.4303	1.15982
		6.4753	1.24254		6.4663	1.16095
		6.5113	1.23893		6.5013	1.15916
		6.5453	1.23934		6.5374	1.16121
		6.5803	1.2401		6.5714	1.16232
		6.6153	1.24199		6.6064	1.16155
		6.6493	1.23959		6.6414	1.16289
		6.6843	1.23684		6.6764	1.16295
		6.7183	1.23862		6.7114	1.16029
		6.7533	1.23843		6.7464	1.16224
		6.7883	1.23459		6.7824	1.16445
		6.8253	1.23723		6.8174	1.16842
		6.8603	1.23634		6.8524	1.16553
		6.8953	1.23957		6.8874	1.16879
		6.9303	1.23589		6.9224	1.16666
		6.9654	1.23615		6.9574	1.16997
		7.0004	1.23901		6.9924	1.16926
		7.0354	1.2379		7.0274	1.16905
		7.0704	1.23628		7.0624	1.16961
		7.1054	1.23701		7.0984	1.17047
		7.1414	1.23804		7.1344	1.17139
		7.1774	1.23843		7.1694	1.17303
		7.2114	1.23439		7.2044	1.17058
		7.2464	1.23384		7.2394	1.17053
		7.2814	1.23773		7.2744	1.17003
		7.3164	1.23948		7.3094	1.16934
		7.3504	1.23998		7.3444	1.16874
		7.3854	1.23748		7.3804	1.17271
		7.4204	1.23692		7.4164	1.17261
		7.4564	1.23982		7.4504	1.17347
		7.4924	1.23896		7.4854	1.17518
		7.5274	1.23921		7.5204	1.17476
		7.5624	1.23548		7.5554	1.17487
		7.5974	1.23818		7.5904	1.17734
		7.6314	1.23615		7.6254	1.17832
		7.6664	1.23631		7.6604	1.17468
		7.7014	1.2367		7.6964	1.17516
		7.7364	1.23589		7.7314	1.17397
		7.7724	1.23634		7.7674	1.17737
		7.8084	1.23642		7.8014	1.17561
		7.8424	1.23756		7.8364	1.17895
		7.8774	1.23762		7.8714	1.18082
		7.9124	1.23414		7.9064	1.18216
		7.9464	1.23776		7.9414	1.18268
		7.9814	1.24001		7.9764	1.18037
		8.0154	1.23542		8.0114	1.18284
		8.0504	1.23996		8.0474	1.18318
		8.0854	1.23918		8.0824	1.17842
		8.1204	1.23603		8.1164	1.17855
		8.1554	1.2369		8.1524	1.18092
		8.1914	1.23553		8.1864	1.18105
		8.2254	1.23812		8.2214	1.18274
		8.2604	1.23509		8.2565	1.18353
		8.2954	1.23553		8.2905	1.18426
		8.3304	1.23623		8.3245	1.18395
		8.3654	1.23556		8.3595	1.18268
		8.4004	1.23698		8.3955	1.17997
		8.4364	1.23225		8.4315	1.18461
		8.4714	1.23587		8.4655	1.1835
		8.5064	1.23704		8.5005	1.18239
		8.5414	1.24065		8.5345	1.18079
		8.5764	1.23411		8.5695	1.184
		8.6124	1.2372		8.6045	1.18461
		8.6474	1.23317		8.6395	1.18534
		8.6814	1.2382		8.6745	1.18237
		8.7165	1.23539		8.7095	1.18658
		8.7525	1.23475		8.7445	1.18497
		8.7875	1.23278		8.7795	1.18271
		8.8235	1.23595		8.8145	1.18445
		8.8585	1.23648		8.8495	1.18816
		8.8935	1.23898		8.8845	1.18518
		8.9275	1.2374		8.9195	1.18861
		8.9625	1.24051		8.9545	1.18489
		8.9975	1.24046		8.9895	1.18647
		9.0315	1.2387		9.0245	1.18718
		9.0665	1.2389		9.0595	1.18921
		9.1025	1.23623		9.0945	1.18895
		9.1355	1.23937		9.1295	1.19039
		9.1705	1.23562		9.1645	1.18795
		9.2055	1.23762		9.1995	1.18855
		9.2405	1.23865		9.2355	1.19189
		9.2755	1.23937		9.2705	1.19139
		9.3105	1.23642		9.3055	1.19161
		9.3455	1.2384		9.3405	1.19305
		9.3805	1.2374		9.3755	1.19068
		9.4155	1.24057		9.4105	1.18921
		9.4495	1.2389		9.4455	1.18787
		9.4845	1.23742		9.4805	1.19071
		9.5205	1.23857		9.5155	1.19045
		9.5545	1.2379		9.5495	1.19005
		9.5895	1.23837		9.5845	1.19492
		9.6235	1.2379		9.6195	1.19329
		9.6585	1.23795		9.6535	1.19461
		9.6935	1.23612		9.6885	1.19555
		9.7285	1.23932		9.7235	1.19695
		9.7635	1.24071		9.7595	1.19382
		9.7985	1.24018		9.7935	1.19413
		9.8335	1.2401		9.8285	1.19666
		9.8685	1.24037		9.8635	1.19587
		9.9035	1.23965		9.8985	1.19629
		9.9385	1.23564		9.9335	1.19545
		9.9725	1.24051		9.9685	1.19545
		10.0075	1.24107		10.0036	1.19571
		10.0425	1.23887		10.0386	1.19703
		10.0775	1.23884		10.0756	1.19539
		10.1125	1.23823		10.1106	1.19547
		10.1475	1.24204		10.1456	1.19805
		10.1835	1.23976		10.1806	1.19771
		10.2185	1.23904		10.2156	1.19534
		10.2535	1.23645		10.2506	1.19724
		10.2885	1.23731		10.2856	1.1975
		10.3225	1.23815		10.3206	1.19816
		10.3575	1.23806		10.3566	1.20179
		10.3925	1.23932		10.3916	1.20153
		10.4265	1.23898		10.4276	1.19797
		10.4616	1.23829		10.4616	1.19779
		10.4966	1.23957		10.4956	1.19955
		10.5316	1.23806		10.5306	1.19871
		10.5666	1.23698		10.5646	1.19884
		10.6016	1.23765		10.5996	1.20071
		10.6366	1.23556		10.6346	1.19821
		10.6716	1.23556		10.6696	1.19895
		10.7066	1.23645		10.7056	1.19916
		10.7416	1.23525		10.7406	1.20026
		10.7766	1.23645		10.7756	1.19745
		10.8116	1.23359		10.8106	1.19576
		10.8476	1.23345		10.8456	1.19805
		10.8826	1.2347		10.8806	1.19816
		10.9166	1.23347		10.9156	1.19671
		10.9516	1.23398		10.9506	1.20005
		10.9866	1.23745		10.9856	1.19866
		11.0206	1.23765		11.0196	1.19921
		11.0556	1.23645		11.0556	1.19724
		11.0906	1.23845		11.0906	1.19982
		11.1256	1.23709		11.1256	1.2005
		11.1606	1.23695		11.1606	1.19861
		11.1956	1.234		11.1956	1.19805
		11.2316	1.23715		11.2306	1.20011
		11.2666	1.23609		11.2656	1.19929
		11.3016	1.23884		11.3006	1.19932
		11.3366	1.23854		11.3356	1.20018
		11.3716	1.23328		11.3716	1.20074
		11.4056	1.23926		11.4066	1.19879
		11.4406	1.23528		11.4416	1.20224
		11.4746	1.23692		11.4766	1.20134
		11.5096	1.23523		11.5116	1.19839
		11.5436	1.23698		11.5466	1.20389
		11.5796	1.23748		11.5816	1.20376
		11.6136	1.24124		11.6166	1.20179
		11.6496	1.2389		11.6516	1.20418
		11.6836	1.23745		11.6876	1.20492
		11.7186	1.23901		11.7236	1.20168
		11.7536	1.23793		11.7577	1.20263
		11.7886	1.23734		11.7927	1.20437
		11.8236	1.23295		11.8277	1.20416
		11.8586	1.23642		11.8617	1.20161
		11.8946	1.23754		11.8957	1.2025
		11.9296	1.2362		11.9307	1.20295
		11.9646	1.23459		11.9657	1.20563
		11.9996	1.2352		11.9997	1.20676
		12.0346	1.23153		12.0347	1.20916
		12.0696	1.23667		12.0697	1.20808
		12.1046	1.2335		12.1047	1.20603
		12.1386	1.2335		12.1407	1.20618
		12.1736	1.23398		12.1747	1.20395
		12.2087	1.23239		12.2097	1.20466
		12.2447	1.23097		12.2437	1.20855
		12.2807	1.23019		12.2787	1.20345
		12.3147	1.23286		12.3137	1.20739
		12.3497	1.23436		12.3487	1.208
		12.3847	1.23186		12.3837	1.20476
		12.4197	1.2345		12.4187	1.20453
		12.4547	1.23278		12.4537	1.20529
		12.4897	1.23765		12.4887	1.2065
		12.5247	1.2379		12.5237	1.20853
		12.5597	1.23409		12.5587	1.20468
		12.5937	1.23603		12.5937	1.20566
		12.6297	1.23779		12.6287	1.20608
		12.6647	1.23395		12.6637	1.20524
		12.6997	1.23606		12.6987	1.20645
		12.7337	1.23678		12.7347	1.20763
		12.7687	1.23684		12.7687	1.20474
		12.8037	1.2367		12.8037	1.20532
		12.8387	1.235		12.8387	1.20905
		12.8737	1.23665		12.8737	1.20774
		12.9077	1.23665		12.9087	1.20658
		12.9437	1.23592		12.9437	1.20874
		12.9787	1.23573		12.9787	1.20947
		13.0127	1.23712		13.0137	1.20671
		13.0477	1.23584		13.0487	1.20463
		13.0817	1.23748		13.0847	1.20755
		13.1157	1.2387		13.1187	1.20821
		13.1507	1.2345		13.1547	1.20639
		13.1857	1.23581		13.1887	1.20658
		13.2207	1.23678		13.2237	1.20866
		13.2557	1.23848		13.2587	1.20784
		13.2927	1.2345		13.2937	1.20789
		13.3267	1.23665		13.3277	1.20637
		13.3627	1.23487		13.3627	1.20713
		13.3967	1.23781		13.3967	1.20661
		13.4317	1.24037		13.4327	1.20618
		13.4667	1.24001		13.4677	1.20837
		13.5017	1.23898		13.5038	1.21213
		13.5367	1.2399		13.5378	1.21063
		13.5717	1.23848		13.5718	1.20976
		13.6067	1.2379		13.6068	1.20874
		13.6427	1.23623		13.6418	1.20932
		13.6787	1.23281		13.6758	1.21145
		13.7127	1.2362		13.7108	1.20821
		13.7477	1.23617		13.7458	1.21374
		13.7827	1.23375		13.7818	1.21082
		13.8167	1.23281		13.8158	1.21142
		13.8517	1.23261		13.8508	1.20942
		13.8867	1.23481		13.8848	1.20995
		13.9227	1.2367		13.9198	1.20926
		13.9588	1.23456		13.9548	1.21211
		13.9938	1.23734		13.9888	1.21263
		14.0288	1.23929		14.0238	1.21245
		14.0638	1.23801		14.0588	1.20995
		14.0988	1.23589		14.0938	1.20592
		14.1338	1.23962		14.1288	1.20553
		14.1678	1.2367		14.1648	1.21155
		14.2028	1.23509		14.2008	1.20824
		14.2368	1.23542		14.2348	1.20992
		14.2738	1.24126		14.2698	1.2085
		14.3078	1.23862		14.3048	1.21121
		14.3438	1.23893		14.3398	1.21079
		14.3778	1.23893		14.3748	1.20995
		14.4128	1.23946		14.4088	1.21124
		14.4478	1.23926		14.4438	1.21068
		14.4828	1.24107		14.4778	1.21179
		14.5178	1.23701		14.5138	1.21129
		14.5528	1.24043		14.5488	1.21184
		14.5898	1.23898		14.5838	1.21287
		14.6238	1.23595		14.6178	1.20942
		14.6598	1.23754		14.6528	1.2135
		14.6938	1.23918		14.6878	1.21505
		14.7278	1.23857		14.7228	1.214
		14.7628	1.2389		14.7578	1.21376
		14.7968	1.23653		14.7928	1.21282
		14.8318	1.23542		14.8278	1.21068
		14.8668	1.23247		14.8628	1.2115
		14.9018	1.23617		14.8978	1.21461
		14.9378	1.23155		14.9328	1.20821
		14.9728	1.23342		14.9678	1.20895
		15.0078	1.23459		15.0028	1.20976
		15.0418	1.23495		15.0378	1.21155
		15.0768	1.23809		15.0728	1.20997
		15.1118	1.234		15.1078	1.20987
		15.1468	1.23423		15.1428	1.21039
		15.1818	1.23564		15.1788	1.20939
		15.2168	1.23651		15.2128	1.20989
		15.2518	1.23475		15.2479	1.21189
		15.2878	1.23595		15.2829	1.20937
		15.3228	1.2374		15.3179	1.20753
		15.3578	1.23706		15.3529	1.20992
		15.3928	1.23659		15.3879	1.20945
		15.4278	1.23915		15.4229	1.20966
		15.4628	1.23951		15.4579	1.209
		15.4978	1.23712		15.4929	1.20889
		15.5328	1.23372		15.5279	1.20911
		15.5678	1.23692		15.5639	1.21074
		15.6028	1.23701		15.5989	1.20779
		15.6378	1.24074		15.6339	1.20789
		15.6738	1.23965		15.6689	1.21116
		15.7079	1.23726		15.7039	1.21032
		15.7419	1.23893		15.7389	1.20887
		15.7769	1.23851		15.7739	1.21068
		15.8109	1.2367		15.8089	1.21005
		15.8459	1.2369		15.8449	1.21074
		15.8799	1.23781		15.8799	1.21153
		15.9149	1.23926		15.9139	1.21053
		15.9499	1.23645		15.9489	1.21142
		15.9849	1.23653		15.9829	1.21255
		16.0199	1.23712		16.0179	1.21311
		16.0549	1.23812		16.0529	1.20979
		16.0899	1.23826		16.0869	1.21158
		16.1249	1.23809		16.1219	1.21276
		16.1599	1.23481		16.1569	1.21082
		16.1949	1.23534		16.1929	1.21132
		16.2299	1.2387		16.2279	1.21382
		16.2649	1.2372		16.2619	1.21292
		16.3009	1.24115		16.2969	1.21316
		16.3359	1.23754		16.3319	1.21534
		16.3709	1.23859		16.3669	1.21358
		16.4059	1.2411		16.4019	1.21355
		16.4409	1.23834		16.4369	1.21379
		16.4759	1.23857		16.4719	1.21679
		16.5109	1.24057		16.5079	1.21537
		16.5459	1.24277		16.5429	1.21808
		16.5809	1.24176		16.5779	1.21534
		16.6159	1.24121		16.6129	1.21637
		16.6519	1.24074		16.6479	1.21539
		16.6869	1.24001		16.6829	1.21579
		16.7209	1.24074		16.7169	1.21142
		16.7559	1.2379		16.7519	1.21708
		16.7909	1.24057		16.7869	1.21461
		16.8259	1.23759		16.8219	1.21784
		16.8609	1.24107		16.8579	1.21674
		16.8959	1.24541		16.8919	1.215
		16.9309	1.24485		16.9269	1.21513
		16.9659	1.24352		16.9619	1.2205
		17.0009	1.24519		16.9969	1.22068
		17.0359	1.24419		17.031	1.22066
		17.0699	1.24341		17.065	1.21908
		17.1049	1.24438		17.1	1.21976
		17.1399	1.24647		17.135	1.21911
		17.1749	1.24235		17.17	1.21642
		17.2099	1.24065		17.205	1.21889
		17.2449	1.2426		17.241	1.21966
		17.2799	1.24154		17.277	1.21979
		17.3159	1.24068		17.312	1.21961
		17.3519	1.24252		17.348	1.21832
		17.3869	1.24079		17.382	1.22171
		17.4219	1.23876		17.417	1.21895
		17.457	1.24023		17.452	1.21868
		17.491	1.24218		17.487	1.2185
		17.526	1.23957		17.523	1.21834
		17.561	1.23934		17.557	1.21945
		17.595	1.23815		17.592	1.21968
		17.63	1.23893		17.627	1.21716
		17.665	1.2379		17.661	1.22066
		17.699	1.23806		17.696	1.21745
		17.734	1.23706		17.731	1.21911
		17.769	1.2387		17.766	1.21889
		17.803	1.23787		17.8	1.22158
		17.838	1.24054		17.834	1.22053
		17.873	1.24238		17.869	1.22089
		17.908	1.23973		17.905	1.22045
		17.943	1.23879		17.94	1.22024
		17.978	1.2382		17.975	1.22024
		18.014	1.23851		18.01	1.22071
		18.049	1.24215		18.045	1.22184
		18.084	1.24135		18.08	1.21997
		18.119	1.24215		18.115	1.21984
		18.154	1.24524		18.15	1.21797
		18.189	1.24126		18.185	1.21961
		18.223	1.24335		18.221	1.21866
		18.258	1.24149		18.256	1.22021
		18.293	1.24327		18.291	1.21811
		18.329	1.24165		18.326	1.21913
		18.364	1.24335		18.361	1.21984
		18.399	1.24193		18.396	1.22282
		18.434	1.24182		18.431	1.22255
		18.468	1.24427		18.466	1.22113
		18.503	1.24355		18.501	1.22218
		18.538	1.24391		18.537	1.22084
		18.573	1.24207		18.572	1.22234
		18.608	1.24293		18.607	1.22208
		18.643	1.23826		18.642	1.21882
		18.679	1.24346		18.677	1.22366
		18.714	1.24135		18.711	1.21937
		18.749	1.24062		18.7461	1.22126
		18.784	1.24121		18.7811	1.21908
		18.819	1.23937		18.8161	1.22142
		18.854	1.23865		18.8521	1.21834
		18.889	1.23845		18.8881	1.21953
		18.924	1.24204		18.9231	1.22074
		18.959	1.23993		18.9571	1.22274
		18.995	1.2384		18.9921	1.22126
		19.031	1.23779		19.0261	1.22239
		19.065	1.23781		19.0611	1.22363
		19.1	1.23907		19.0961	1.22003
		19.134	1.24051		19.1311	1.21995
		19.169	1.2416		19.1661	1.21716
		19.2041	1.24113		19.2031	1.21989
		19.2391	1.24463		19.2381	1.21758
		19.2741	1.24332		19.2731	1.22189
		19.3091	1.2424		19.3081	1.22121
		19.3451	1.24115		19.3431	1.22189
		19.3791	1.24424		19.3791	1.22179
		19.4151	1.24304		19.4141	1.21632
		19.4491	1.2419		19.4491	1.22026
		19.4841	1.24316		19.4851	1.21992
		19.5191	1.24252		19.5211	1.21997
		19.5541	1.24293		19.5551	1.22068
		19.5891	1.24341		19.5901	1.22274
		19.6231	1.24126		19.6251	1.22242
		19.6571	1.24104		19.6601	1.22358
		19.6941	1.24135		19.6951	1.21942
		19.7291	1.23776		19.7301	1.22089
		19.7641	1.23678		19.7641	1.22387
		19.7981	1.23851		19.7991	1.22013
		19.8331	1.23651		19.8351	1.22139
		19.8681	1.23809		19.8701	1.2215
		19.9031	1.23781		19.9051	1.21939
		19.9371	1.23862		19.9401	1.22253
		19.9721	1.23815		19.9741	1.22279
		20.0081	1.2404		20.0091	1.22424
		20.0431	1.23768		20.0441	1.22239
		20.0781	1.23943		20.0791	1.22482
		20.1131	1.23715		20.1141	1.22189
		20.1481	1.24068		20.1501	1.22026
		20.1811	1.24357		20.1851	1.22626
		20.2161	1.24143		20.2201	1.22645
		20.2511	1.23948		20.2551	1.22266
		20.2861	1.2394		20.2901	1.22379
		20.3211	1.2411		20.3251	1.22345
		20.3561	1.2414		20.3601	1.22492
		20.3911	1.24363		20.3951	1.22424
		20.4271	1.24238		20.4291	1.22421
		20.4621	1.23915		20.4651	1.22389
		20.4971	1.23951		20.5002	1.22305
		20.5321	1.23834		20.5362	1.224
		20.5671	1.24032		20.5712	1.22432
		20.6021	1.24321		20.6062	1.22684
		20.6371	1.24366		20.6402	1.22703
		20.6721	1.24444		20.6752	1.22545
		20.7071	1.24583		20.7102	1.22608
		20.7421	1.2441		20.7452	1.22579
		20.7761	1.24182		20.7802	1.22487
		20.8111	1.24215		20.8162	1.22361
		20.8451	1.2406		20.8512	1.224
		20.8801	1.24199		20.8862	1.22453
		20.9151	1.24304		20.9212	1.22421
		20.9492	1.24068		20.9562	1.22637
		20.9832	1.24074		20.9902	1.22792
		21.0182	1.2416		21.0252	1.22568
		21.0532	1.2367		21.0602	1.22687
		21.0882	1.23748		21.0952	1.22726
		21.1232	1.23907		21.1312	1.22568
		21.1582	1.23971		21.1672	1.22358
		21.1932	1.23843		21.2012	1.22642
		21.2282	1.23818		21.2362	1.22466
		21.2632	1.2384		21.2712	1.22771
		21.2982	1.23779		21.3062	1.22468
		21.3332	1.23965		21.3412	1.22613
		21.3682	1.23751		21.3752	1.22847
		21.4032	1.23793		21.4102	1.22489
		21.4392	1.23414		21.4462	1.22521
		21.4752	1.23665		21.4812	1.22671
		21.5092	1.23726		21.5162	1.22476
		21.5442	1.23943		21.5502	1.22611
		21.5792	1.23907		21.5852	1.22655
		21.6142	1.23784		21.6202	1.22666
		21.6492	1.23695		21.6542	1.22513
		21.6842	1.23882		21.6892	1.22439
		21.7192	1.24316		21.7232	1.22303
		21.7542	1.24535		21.7582	1.22358
		21.7892	1.24046		21.7922	1.22674
		21.8242	1.24068		21.8262	1.22134
		21.8592	1.24121		21.8612	1.22608
		21.8942	1.23665		21.8962	1.22497
		21.9292	1.23712		21.9322	1.22521
		21.9642	1.24079		21.9672	1.22605
		21.9992	1.2424		22.0012	1.225
		22.0342	1.23968		22.0362	1.22416
		22.0682	1.23857		22.0712	1.22339
		22.1042	1.24207		22.1062	1.22205
		22.1402	1.24243		22.1412	1.22524
		22.1752	1.24243		22.1762	1.22376
		22.2102	1.24163		22.2112	1.22168
		22.2452	1.24129		22.2463	1.22229
		22.2792	1.24471		22.2823	1.22371
		22.3142	1.24394		22.3163	1.22376
		22.3492	1.24313		22.3513	1.22313
		22.3842	1.24082		22.3863	1.2225
		22.4192	1.24574		22.4213	1.22261
		22.4542	1.24299		22.4563	1.22182
		22.4902	1.24338		22.4913	1.22461
		22.5242	1.24252		22.5263	1.22571
		22.5592	1.24068		22.5613	1.22484
		22.5942	1.23887		22.5963	1.223
		22.6292	1.24357		22.6313	1.22111
		22.6642	1.24199		22.6663	1.22197
		22.6993	1.24165		22.7013	1.22079
		22.7353	1.24513		22.7363	1.22287
		22.7713	1.24274		22.7713	1.22166
		22.8053	1.2433		22.8063	1.22242
		22.8403	1.2424		22.8403	1.21716
		22.8753	1.24399		22.8763	1.22113
		22.9103	1.24438		22.9123	1.22255
		22.9453	1.24485		22.9473	1.22066
		22.9803	1.24249		22.9823	1.223
		23.0153	1.24179		23.0173	1.22171
		23.0493	1.24366		23.0523	1.22082
		23.0853	1.24363		23.0873	1.22071
		23.1203	1.24368		23.1223	1.22245
		23.1553	1.24368		23.1573	1.22687
		23.1903	1.2451		23.1923	1.22321
		23.2253	1.24533		23.2273	1.22379
		23.2603	1.24516		23.2623	1.22163
		23.2953	1.24638		23.2963	1.22403
		23.3303	1.24062		23.3313	1.22268
		23.3653	1.24338		23.3653	1.22389
		23.4013	1.24599		23.4003	1.22242
		23.4363	1.24463		23.4353	1.2255
		23.4713	1.24697		23.4693	1.22403
		23.5063	1.24299		23.5043	1.22463
		23.5413	1.24391		23.5393	1.22521
		23.5763	1.24363		23.5743	1.22387
		23.6113	1.24227		23.6093	1.22368
		23.6463	1.24285		23.6443	1.22321
		23.6823	1.24026		23.6793	1.21868
		23.7183	1.24346		23.7133	1.21974
		23.7533	1.2446		23.7473	1.21984
		23.7883	1.24427		23.7823	1.22058
		23.8233	1.24213		23.8173	1.22029
		23.8583	1.2446		23.8523	1.22082
		23.8923	1.24229		23.8873	1.21787
		23.9273	1.23815		23.9223	1.21963
		23.9613	1.24049		23.9583	1.21824
		23.9963	1.23645		23.9934	1.22076
		24.0323	1.2377		24.0284	1.21684
		24.0673	1.23537		24.0624	1.21987
		24.1023	1.23481		24.0964	1.21874
		24.1373	1.23723		24.1314	1.21911
		24.1713	1.23765		24.1664	1.22392
		24.2063	1.235		24.2014	1.22392
		24.2413	1.23631		24.2364	1.22324
		24.2763	1.23364		24.2714	1.21995
		24.3113	1.23665		24.3064	1.22095
		24.3473	1.23759		24.3414	1.22189
		24.3813	1.23606		24.3764	1.22234
		24.4173	1.23409		24.4114	1.22155
		24.4524	1.23642		24.4464	1.22129
		24.4864	1.23628		24.4814	1.22229
		24.5214	1.23303		24.5164	1.22082
		24.5564	1.23631		24.5514	1.22205
		24.5914	1.23155		24.5864	1.22208
		24.6264	1.23314		24.6224	1.22263
		24.6614	1.23489		24.6574	1.22437
		24.6974	1.23169		24.6934	1.22408
		24.7324	1.23097		24.7274	1.22366
		24.7674	1.232		24.7624	1.22342
		24.8024	1.23272		24.7974	1.22353
		24.8374	1.23359		24.8324	1.22366
		24.8724	1.23228		24.8674	1.22313
		24.9074	1.23244		24.9024	1.22718
		24.9424	1.23219		24.9374	1.22432
		24.9764	1.23155		24.9724	1.22855
		25.0114	1.23091		25.0074	1.22789
		25.0474	1.23044		25.0424	1.22616
		25.0814	1.2313		25.0774	1.22568
		25.1164	1.23014		25.1114	1.22597
		25.1514	1.22744		25.1464	1.22595
		25.1864	1.23078		25.1814	1.22389
		25.2204	1.22911		25.2164	1.22368
		25.2554	1.23225		25.2514	1.22279
		25.2904	1.23367		25.2854	1.22247
		25.3254	1.23509		25.3214	1.22334
		25.3604	1.22989		25.3574	1.22455
		25.3944	1.23609		25.3924	1.2255
		25.4294	1.23509		25.4274	1.22389
		25.4644	1.23334		25.4614	1.22182
		25.4994	1.23595		25.4964	1.22484
		25.5344	1.23545		25.5304	1.22347
		25.5694	1.235		25.5644	1.22379
		25.6034	1.23336		25.5994	1.22134
		25.6384	1.2337		25.6344	1.22079
		25.6744	1.23453		25.6694	1.22171
		25.7094	1.23169		25.7054	1.21858
		25.7454	1.23598		25.7395	1.21813
		25.7794	1.23448		25.7745	1.22158
		25.8154	1.23595		25.8095	1.22247
		25.8494	1.23517		25.8445	1.22111
		25.8834	1.23795		25.8795	1.22171
		25.9184	1.23662		25.9145	1.22237
		25.9534	1.23403		25.9495	1.22171
		25.9884	1.23665		25.9855	1.22447
		26.0224	1.23729		26.0205	1.22424
		26.0574	1.23595		26.0555	1.22513
		26.0924	1.23603		26.0905	1.22584
		26.1284	1.24151		26.1255	1.22368
		26.1634	1.23787		26.1605	1.22329
		26.1985	1.24268		26.1955	1.22513
		26.2335	1.23865		26.2305	1.22542
		26.2685	1.23934		26.2655	1.22255
		26.3025	1.23809		26.3025	1.22545
		26.3375	1.24096		26.3365	1.22053
		26.3725	1.24279		26.3715	1.22274
		26.4075	1.23951		26.4065	1.22129
		26.4445	1.23985		26.4415	1.22005
		26.4795	1.23612		26.4765	1.22297
		26.5145	1.23784		26.5115	1.22153
		26.5495	1.23887		26.5465	1.22268
		26.5835	1.23754		26.5815	1.21929
		26.6175	1.23768		26.6155	1.22303
		26.6525	1.24057		26.6515	1.22016
		26.6875	1.24199		26.6855	1.22411
		26.7235	1.23973		26.7205	1.22447
		26.7585	1.24004		26.7555	1.22361
		26.7935	1.23576		26.7905	1.22318
		26.8295	1.2404		26.8255	1.22024
		26.8635	1.23781		26.8595	1.21971
		26.8975	1.23606		26.8945	1.21908
		26.9325	1.23954		26.9295	1.22218
		26.9665	1.2409		26.9645	1.226
		27.0015	1.24196		27.0005	1.22684
		27.0365	1.24076		27.0355	1.22487
		27.0715	1.2362		27.0705	1.22147
		27.1065	1.2414		27.1055	1.22497
		27.1415	1.2401		27.1405	1.22324
		27.1765	1.24494		27.1745	1.22361
		27.2125	1.24396		27.2095	1.22263
		27.2465	1.24252		27.2445	1.21942
		27.2815	1.24023		27.2795	1.21884
		27.3165	1.24363		27.3155	1.22047
		27.3515	1.24368		27.3505	1.21889
		27.3855	1.24135		27.3855	1.21855
		27.4205	1.2414		27.4205	1.22313
		27.4555	1.2416		27.4545	1.22311
		27.4915	1.24107		27.4896	1.22042
		27.5275	1.24113		27.5246	1.22029
		27.5625	1.23862		27.5596	1.22176
		27.5975	1.2421		27.5946	1.22
		27.6325	1.24471		27.6296	1.22224
		27.6665	1.2433		27.6646	1.22208
		27.7015	1.24363		27.6996	1.22505
		27.7365	1.24196		27.7346	1.21797
		27.7715	1.24176		27.7696	1.22118
		27.8075	1.24196		27.8046	1.21921
		27.8425	1.23907		27.8396	1.22332
		27.8775	1.24124		27.8746	1.22163
		27.9125	1.24243		27.9096	1.21842
		27.9476	1.24338		27.9446	1.22261
		27.9826	1.2419		27.9796	1.22184
		28.0176	1.24396		28.0146	1.22258
		28.0516	1.24076		28.0496	1.22139
		28.0866	1.24157		28.0846	1.22316
		28.1236	1.23879		28.1196	1.22321
		28.1586	1.23921		28.1536	1.21945
		28.1926	1.2384		28.1886	1.22197
		28.2276	1.24318		28.2236	1.21368
		28.2626	1.24193		28.2586	1.21963
		28.2976	1.24424		28.2936	1.22074
		28.3326	1.24093		28.3286	1.22363
		28.3676	1.24188		28.3646	1.22111
		28.4026	1.2399		28.3986	1.21945
		28.4386	1.23829		28.4336	1.22216
		28.4746	1.23826		28.4686	1.22274
		28.5096	1.24015		28.5036	1.22324
		28.5436	1.23865		28.5386	1.21866
		28.5786	1.23959		28.5736	1.22363
		28.6136	1.24018		28.6076	1.21934
		28.6476	1.23809		28.6426	1.22042
		28.6826	1.2384		28.6766	1.22242
		28.7176	1.24043		28.7126	1.21876
		28.7526	1.24304		28.7466	1.21737
		28.7876	1.24279		28.7816	1.21968
		28.8226	1.24174		28.8166	1.21842
		28.8566	1.24463		28.8516	1.22113
		28.8916	1.24533		28.8856	1.22224
		28.9266	1.24394		28.9206	1.22392
		28.9616	1.24413		28.9556	1.22221
		28.9966	1.24207		28.9906	1.21997
		29.0316	1.24018		29.0256	1.22129
		29.0666	1.23965		29.0616	1.22297
		29.1016	1.23915		29.0956	1.22111
		29.1376	1.23648		29.1306	1.22266
		29.1706	1.24093		29.1656	1.22408
		29.2066	1.24001		29.2006	1.22484
		29.2416	1.23907		29.2346	1.22411
		29.2766	1.24154		29.2697	1.22224
		29.3116	1.24124		29.3047	1.22416
		29.3466	1.23684		29.3397	1.22382
		29.3816	1.24049		29.3737	1.22121
		29.4156	1.23862		29.4087	1.22039
		29.4506	1.23982		29.4437	1.22434
		29.4866	1.23768		29.4797	1.22321
		29.5216	1.23862		29.5147	1.22158
		29.5566	1.23781		29.5487	1.22171
		29.5916	1.23751		29.5847	1.22653
		29.6266	1.23576		29.6197	1.22455
		29.6616	1.23804		29.6547	1.22487
		29.6967	1.2374		29.6897	1.22566
		29.7317	1.23943		29.7257	1.22968
		29.7667	1.2384		29.7607	1.22332
		29.8027	1.23751		29.7957	1.22542
		29.8387	1.2377		29.8307	1.22355
		29.8727	1.23954		29.8647	1.22105
		29.9077	1.24185		29.8997	1.22171
		29.9427	1.24132		29.9347	1.22679
		29.9777	1.24185		29.9697	1.22437
		30.0127	1.24196
		30.0477	1.23801
		30.0837	1.24124
		30.1177	1.23909
		30.1527	1.23948
		30.1887	1.24215
		30.2237	1.24054
		30.2587	1.23698
		30.2927	1.23879
		30.3277	1.24149
		30.3627	1.24176
		30.3977	1.23615
		30.4347	1.23628
		30.4697	1.2382
		30.5047	1.24324
		30.5387	1.24074
		30.5737	1.24099
		30.6087	1.24076
		30.6437	1.24035
		30.6787	1.24335
		30.7137	1.24118
		30.7507	1.24238
		30.7847	1.24196
		30.8197	1.24332
		30.8547	1.24224
		30.8897	1.24293
		30.9247	1.24012
		30.9597	1.24466
		30.9947	1.24224
		31.0297	1.24182
		31.0637	1.2424
		31.0997	1.24113
		31.1337	1.24068
		31.1687	1.24346
		31.2037	1.2431
		31.2377	1.24246
		31.2727	1.24126
		31.3077	1.23701
		31.3417	1.24138
		31.3757	1.23951
		31.4107	1.24163
		31.4458	1.24093
		31.4818	1.23801
		31.5178	1.24146
		31.5518	1.24299
		31.5868	1.24037
		31.6208	1.24343
		31.6558	1.24327
		31.6908	1.24435
		31.7258	1.23982
		31.7608	1.24168
		31.7968	1.24087
		31.8318	1.23962
		31.8668	1.2389
		31.9018	1.2399
		31.9368	1.24143
		31.9708	1.23904
		32.0058	1.2419
		32.0408	1.24012
		32.0758	1.23998
		32.1108	1.23848
		32.1458	1.24118
		32.1808	1.24196
		32.2168	1.23859
		32.2518	1.23851
		32.2858	1.23985
		32.3208	1.24043
		32.3558	1.24149
		32.3908	1.2421
		32.4248	1.24065
		32.4598	1.24021
		32.4958	1.23907
		32.5318	1.23982
		32.5658	1.24124
		32.6008	1.23884
		32.6358	1.24213
		32.6708	1.2438
		32.7058	1.2399
		32.7408	1.24229
		32.7748	1.23985
		32.8108	1.24165
		32.8438	1.24068
		32.8808	1.24296
		32.9158	1.24227
		32.9508	1.24087
		32.9848	1.24001
		33.0198	1.24282
		33.0548	1.2421
		33.0898	1.24302
		33.1248	1.24026
		33.1608	1.24193
		33.1969	1.24015
		33.2309	1.24332
		33.2659	1.24132
		33.3009	1.23873
		33.3359	1.24213
		33.3709	1.23706
		33.4059	1.24218
		33.4409	1.24163
		33.4769	1.23893
		33.5119	1.24391
		33.5469	1.23862
		33.5819	1.23896
		33.6169	1.24037
		33.6519	1.24057
		33.6869	1.23901
		33.7219	1.24463
		33.7569	1.24374
		33.7929	1.24135
		33.8269	1.24037
		33.8629	1.23998
		33.8979	1.24327
		33.9329	1.23962
		33.9679	1.24004
		34.0019	1.23965
		34.0369	1.24218
		34.0719	1.23907
		34.1079	1.2404
		34.1439	1.24046
		34.1789	1.23857
		34.2139	1.23909
		34.2479	1.2404
		34.2829	1.23759
		34.3179	1.23717
		34.3529	1.23893
		34.3879	1.24049
		34.4239	1.23756
		34.4599	1.23937
		34.4929	1.24007

## Sheet: Fig 4D
	apo	ATP	ATPgS
	97.7698	15.1022	11.258
	84.5159	10.7204	10.677
	175.246	12.2258	10.124
	158.349		6.489
	132.873		33.355
	160.992		7.591
	127.857
mean	133.943	12.6828	13.249
stdev	33.7218	2.22636	10.023
