# Supplementary material for: A new insight into RecA filament regulation by RecX from the analysis of conformation-specific interactions
Source: eLife. 2022 Jun 22;11:e78409. doi: 10.7554/eLife.78409 (PMC9252578; doi:10.7554/eLife.78409)
Supplement: Figure 5—figure supplement 1—source data 1. [file elife-78409-fig5-figsupp1-data1.xlsx]

## Sheet: A
	Time, s	Length, µm
	0	4.9609
	0.035	4.9603
	0.07	4.9558
	0.105	4.9592
	0.14	4.9638
	0.174	4.956
	0.209	4.9585
	0.244	4.9621
	0.279	4.9602
	0.314	4.9567
	0.349	4.9538
	0.384	4.9513
	0.418	4.9557
	0.452	4.955
	0.487	4.9557
	0.522	4.9525
	0.557	4.9551
	0.592	4.9546
	0.628	4.9617
	0.662	4.9613
	0.696	4.9641
	0.7311	4.9693
	0.7661	4.9638
	0.8011	4.969
	0.8361	4.9718
	0.8711	4.9723
	0.9051	4.9766
	0.9401	4.9805
	0.9751	4.9764
	1.0091	4.9767
	1.0441	4.9784
	1.0801	4.9761
	1.1151	4.9809
	1.1491	4.9725
	1.1851	4.9763
	1.2191	4.9576
	1.2541	4.9646
	1.2891	4.9628
	1.3241	4.9627
	1.3591	4.9645
	1.3941	4.9662
	1.4291	4.9615
	1.4641	4.9787
	1.4991	4.974
	1.5341	4.9726
	1.5691	4.9721
	1.6041	4.9666
	1.6391	4.964
	1.6751	4.968
	1.7101	4.9601
	1.7451	4.9648
	1.7801	4.9762
	1.8141	4.9666
	1.8491	4.9733
	1.8841	4.9799
	1.9191	4.9767
	1.9541	4.9825
	1.9891	4.98
	2.0251	4.9776
	2.0591	4.984
	2.0951	4.966
	2.1291	4.973
	2.1641	4.9738
	2.1991	4.9677
	2.2351	4.9723
	2.2691	4.9716
	2.3041	4.9747
	2.3401	4.9887
	2.3751	4.9786
	2.4111	4.9865
	2.4461	4.9778
	2.4812	4.9763
	2.5162	4.9832
	2.5512	4.9765
	2.5872	4.9783
	2.6212	4.9747
	2.6582	4.9755
	2.6932	4.9842
	2.7272	4.9776
	2.7622	4.984
	2.7972	4.9834
	2.8322	4.9853
	2.8672	4.9848
	2.9022	4.9722
	2.9382	4.9859
	2.9732	4.9887
	3.0082	4.9814
	3.0432	4.9807
	3.0782	4.9733
	3.1132	4.9809
	3.1482	4.9753
	3.1832	4.9773
	3.2182	4.9847
	3.2542	4.9738
	3.2892	4.9828
	3.3242	4.9788
	3.3592	4.9777
	3.3942	4.9722
	3.4292	4.9767
	3.4642	4.9764
	3.4992	4.9864
	3.5332	4.9809
	3.5682	4.9739
	3.6042	4.9658
	3.6382	4.9666
	3.6732	4.9674
	3.7082	4.967
	3.7432	4.971
	3.7782	4.9718
	3.8132	4.9738
	3.8472	4.9674
	3.8822	4.9702
	3.9172	4.9771
	3.9522	4.9822
	3.9882	4.9837
	4.0232	4.9821
	4.0582	4.9888
	4.0932	4.9847
	4.1282	4.9921
	4.1632	4.9916
	4.1982	4.9766
	4.2343	4.9891
	4.2693	4.9871
	4.3043	4.9804
	4.3383	4.9799
	4.3733	4.9831
	4.4083	4.9899
	4.4433	4.9909
	4.4783	4.9895
	4.5133	4.9947
	4.5483	4.9881
	4.5833	4.9895
	4.6183	4.9949
	4.6533	4.9842
	4.6883	4.9884
	4.7233	4.9923
	4.7583	4.9887
	4.7923	4.9875
	4.8273	4.9929
	4.8623	4.9926
	4.8973	4.9976
	4.9323	4.9955
	4.9683	4.9811
	5.0033	4.9809
	5.0383	4.9911
	5.0733	4.9894
	5.1083	4.9933
	5.1433	4.9859
	5.1783	4.9897
	5.2133	4.9884
	5.2483	4.9897
	5.2833	4.9883
	5.3183	4.9822
	5.3533	4.9738
	5.3883	4.9792
	5.4233	4.9808
	5.4583	4.9684
	5.4923	4.9643
	5.5273	4.9646
	5.5623	4.965
	5.5973	4.9722
	5.6333	4.9762
	5.6673	4.976
	5.7023	4.9747
	5.7373	4.9788
	5.7723	4.9804
	5.8073	4.9809
	5.8423	4.9769
	5.8773	4.982
	5.9133	4.9743
	5.9483	4.9801
	5.9844	4.9794
	6.0194	4.9925
	6.0544	4.9694
	6.0894	4.9753
	6.1254	4.9731
	6.1594	4.9591
	6.1944	4.9645
	6.2294	4.9573
	6.2664	4.9552
	6.3024	4.9583
	6.3374	4.9572
	6.3724	4.9458
	6.4074	4.9519
	6.4434	4.95
	6.4774	4.9535
	6.5124	4.9461
	6.5484	4.9391
	6.5834	4.944
	6.6184	4.9488
	6.6534	4.94
	6.6884	4.9482
	6.7234	4.9428
	6.7584	4.9464
	6.7934	4.9423
	6.8284	4.9406
	6.8634	4.9412
	6.8994	4.9482
	6.9344	4.9432
	6.9694	4.9458
	7.0044	4.947
	7.0394	4.9481
	7.0744	4.9478
	7.1094	4.9517
	7.1454	4.9568
	7.1804	4.9526
	7.2164	4.955
	7.2514	4.9549
	7.2864	4.9595
	7.3214	4.9623
	7.3564	4.9619
	7.3914	4.9575
	7.4274	4.9583
	7.4624	4.9695
	7.4974	4.9592
	7.5324	4.9596
	7.5674	4.9605
	7.6024	4.9564
	7.6374	4.9551
	7.6724	4.9607
	7.7075	4.956
	7.7455	4.9569
	7.7805	4.9507
	7.8145	4.952
	7.8495	4.9413
	7.8845	4.9483
	7.9195	4.9554
	7.9545	4.954
	7.9895	4.9503
	8.0245	4.9587
	8.0605	4.9559
	8.0965	4.9704
	8.1305	4.9635
	8.1655	4.9632
	8.2005	4.9637
	8.2355	4.9599
	8.2705	4.9518
	8.3055	4.9623
	8.3405	4.9626
	8.3765	4.9681
	8.4125	4.9719
	8.4475	4.9689
	8.4815	4.9639
	8.5155	4.9697
	8.5505	4.9641
	8.5855	4.9661
	8.6205	4.963
	8.6555	4.9645
	8.6915	4.9667
	8.7265	4.966
	8.7615	4.957
	8.7965	4.9684
	8.8305	4.9749
	8.8655	4.9662
	8.9005	4.9659
	8.9345	4.967
	8.9695	4.9679
	9.0035	4.968
	9.0385	4.9589
	9.0725	4.9531
	9.1085	4.9615
	9.1445	4.9517
	9.1795	4.9489
	9.2145	4.951
	9.2485	4.9493
	9.2835	4.9591
	9.3185	4.9517
	9.3535	4.9457
	9.3875	4.9506
	9.4235	4.9576
	9.4596	4.9573
	9.4936	4.9504
	9.5286	4.9582
	9.5636	4.9518
	9.5986	4.9597
	9.6336	4.9633
	9.6686	4.9503
	9.7026	4.9543
	9.7386	4.9491
	9.7736	4.9497
	9.8086	4.9517
	9.8436	4.9415
	9.8786	4.9448
	9.9136	4.9478
	9.9486	4.949
	9.9846	4.9445
	10.0186	4.9408
	10.0536	4.942
	10.0896	4.9378
	10.1236	4.9341
	10.1586	4.9294
	10.1936	4.9367
	10.2286	4.9306
	10.2636	4.9347
	10.2986	4.9386
	10.3336	4.9351
	10.3676	4.9417
	10.4036	4.9462
	10.4386	4.9482
	10.4736	4.9488
	10.5086	4.9376
	10.5436	4.9407
	10.5786	4.9505
	10.6136	4.9547
	10.6486	4.9534
	10.6836	4.9623
	10.7196	4.9516
	10.7546	4.9643
	10.7896	4.9608
	10.8246	4.9584
	10.8596	4.9522
	10.8946	4.954
	10.9296	4.9583
	10.9646	4.9628
	10.9996	4.9654
	11.0356	4.9467
	11.0706	4.9556
	11.1056	4.9511
	11.1406	4.9409
	11.1756	4.9339
	11.2107	4.9261
	11.2457	4.9302
	11.2807	4.9331
	11.3157	4.9391
	11.3507	4.9451
	11.3867	4.9361
	11.4217	4.9364
	11.4567	4.941
	11.4917	4.9386
	11.5267	4.9382
	11.5617	4.9387
	11.5967	4.9377
	11.6307	4.9365
	11.6667	4.9421
	11.7017	4.934
	11.7367	4.9349
	11.7717	4.9384
	11.8067	4.9348
	11.8417	4.9467
	11.8767	4.9467
	11.9127	4.952
	11.9467	4.9522
	11.9817	4.9428
	12.0167	4.9479
	12.0517	4.9411
	12.0877	4.9449
	12.1227	4.9484
	12.1577	4.9565
	12.1927	4.9485
	12.2277	4.9484
	12.2627	4.9534
	12.2977	4.9496
	12.3337	4.9583
	12.3697	4.9485
	12.4047	4.9492
	12.4387	4.9578
	12.4737	4.9593
	12.5077	4.9599
	12.5427	4.9633
	12.5777	4.9618
	12.6127	4.9616
	12.6487	4.9576
	12.6837	4.9609
	12.7187	4.9547
	12.7537	4.9565
	12.7887	4.9544
	12.8227	4.9525
	12.8577	4.9499
	12.8927	4.9573
	12.9277	4.9504
	12.9628	4.9461
	12.9978	4.9377
	13.0328	4.945
	13.0688	4.9493
	13.1038	4.9454
	13.1388	4.9451
	13.1738	4.947
	13.2088	4.9423
	13.2428	4.9516
	13.2778	4.945
	13.3138	4.9425
	13.3488	4.9477
	13.3848	4.9403
	13.4208	4.9478
	13.4548	4.9469
	13.4898	4.9462
	13.5238	4.9557
	13.5588	4.9447
	13.5938	4.9466
	13.6298	4.9398
	13.6648	4.9462
	13.6998	4.9496
	13.7348	4.9469
	13.7698	4.9585
	13.8048	4.9556
	13.8398	4.9629
	13.8748	4.9582
	13.9098	4.96
	13.9458	4.9602
	13.9818	4.9717
	14.0158	4.9673
	14.0508	4.9715
	14.0858	4.9722
	14.1208	4.9738
	14.1558	4.9718
	14.1908	4.9776
	14.2258	4.9707
	14.2608	4.9717
	14.2958	4.9737
	14.3308	4.9795
	14.3658	4.9724
	14.4018	4.966
	14.4368	4.9643
	14.4718	4.9657
	14.5058	4.9593
	14.5408	4.961
	14.5768	4.9558
	14.6118	4.9668
	14.6468	4.9725
	14.6818	4.9627
	14.7169	4.964
	14.7519	4.9571
	14.7869	4.9687
	14.8219	4.9699
	14.8569	4.9744
	14.8929	4.9749
	14.9279	4.9807
	14.9629	4.976
	14.9979	4.9795
	15.0329	4.9717
	15.0679	4.9761
	15.1029	4.9754
	15.1379	4.9855
	15.1719	4.9825
	15.2069	4.9845
	15.2419	4.9786
	15.2769	4.9781
	15.3129	4.9758
	15.3479	4.9844
	15.3829	4.9731
	15.4179	4.9696
	15.4529	4.9661
	15.4869	4.9618
	15.5219	4.9602
	15.5569	4.9578
	15.5929	4.9573
	15.6269	4.9615
	15.6619	4.9689
	15.6969	4.9659
	15.7319	4.9665
	15.7669	4.9602
	15.8019	4.9606
	15.8369	4.9701
	15.8719	4.9623
	15.9079	4.9575
	15.9429	4.9676
	15.9779	4.9659
	16.0129	4.9519
	16.0479	4.9559
	16.0819	4.9554
	16.1169	4.9597
	16.1519	4.9572
	16.1869	4.9521
	16.2219	4.9477
	16.2569	4.9507
	16.2919	4.9422
	16.3269	4.9437
	16.3609	4.9446
	16.3959	4.9502
	16.4299	4.9513
	16.466	4.9484
	16.501	4.9475
	16.536	4.9453
	16.571	4.9387
	16.606	4.9507
	16.641	4.9573
	16.676	4.9606
	16.711	4.956
	16.746	4.9615
	16.781	4.9702
	16.816	4.9639
	16.851	4.9652
	16.886	4.9595
	16.922	4.9649
	16.958	4.9631
	16.993	4.9648
	17.028	4.969
	17.063	4.9675
	17.098	4.9751
	17.133	4.9677
	17.168	4.9562
	17.202	4.9633
	17.238	4.965
	17.274	4.9546
	17.309	4.9605
	17.345	4.966
	17.379	4.9629
	17.414	4.9583
	17.449	4.9678
	17.484	4.9679
	17.52	4.9569
	17.555	4.9633
	17.59	4.966
	17.625	4.9685
	17.66	4.9645
	17.695	4.9664
	17.73	4.9679
	17.765	4.9624
	17.8	4.9597
	17.836	4.9669
	17.871	4.9692
	17.907	4.9611
	17.941	4.9618
	17.976	4.9627
	18.011	4.9669
	18.046	4.9691
	18.081	4.9574
	18.116	4.9643
	18.151	4.9589
	18.187	4.9689
	18.2221	4.9653
	18.2571	4.9706
	18.2921	4.9724
	18.3271	4.9669
	18.3621	4.9646
	18.3971	4.9668
	18.4321	4.9648
	18.4681	4.963
	18.5041	4.9781
	18.5391	4.9756
	18.5741	4.9808
	18.6101	4.9815
	18.6451	4.9803
	18.6801	4.9852
	18.7151	4.9847
	18.7511	4.9817
	18.7861	4.9838
	18.8211	4.978
	18.8561	4.9858
	18.8911	4.984
	18.9261	4.9846
	18.9601	4.9847
	18.9951	4.9902
	19.0301	4.9773
	19.0641	4.9855
	19.0991	4.9775
	19.1341	4.9775
	19.1691	4.9653
	19.2041	4.9736
	19.2391	4.9734
	19.2741	4.9637
	19.3091	4.9704
	19.3441	4.9588
	19.3791	4.969
	19.4141	4.9633
	19.4501	4.9774
	19.4841	4.9773
	19.5201	4.9691
	19.5551	4.9701
	19.5901	4.9683
	19.6251	4.9727
	19.6601	4.979
	19.6941	4.9789
	19.7291	4.9698
	19.7651	4.9742
	19.8001	4.9844
	19.8351	4.985
	19.8691	4.99
	19.9041	4.989
	19.9381	4.9811
	19.9732	4.9866
	20.0082	4.9826
	20.0432	4.9933
	20.0782	4.99
	20.1142	4.9841
	20.1492	4.9892
	20.1842	4.9877
	20.2192	4.9895
	20.2542	4.993
	20.2892	4.9949
	20.3242	4.9976
	20.3592	4.9998
	20.3942	4.9993
	20.4292	4.9951
	20.4642	4.9985
	20.5002	4.9854
	20.5332	4.987
	20.5682	4.9936
	20.6032	4.9977
	20.6382	4.9934
	20.6732	4.9864
	20.7082	5.0002
	20.7432	4.9964
	20.7792	4.9921
	20.8142	4.9934
	20.8492	4.9959
	20.8842	4.9911
	20.9192	4.9854
	20.9542	4.9921
	20.9892	4.989
	21.0242	4.9884
	21.0582	4.9848
	21.0942	4.9845
	21.1292	4.9897
	21.1642	4.9872
	21.1992	4.9879
	21.2342	4.9858
	21.2692	4.9947
	21.3042	4.9917
	21.3392	4.9965
	21.3732	4.999
	21.4082	4.9908
	21.4432	4.9878
	21.4782	4.9818
	21.5142	4.9936
	21.5482	4.9846
	21.5832	4.9817
	21.6182	4.9879
	21.6532	4.969
	21.6873	4.9712
	21.7223	4.9623
	21.7573	4.9659
	21.7933	4.9636
	21.8273	4.9575
	21.8623	4.9566
	21.8973	4.9587
	21.9323	4.9492
	21.9673	4.9529
	22.0023	4.9472
	22.0373	4.9515
	22.0723	4.9609
	22.1073	4.9571
	22.1433	4.9614
	22.1783	4.97
	22.2133	4.9679
	22.2483	4.9685
	22.2833	4.9627
	22.3173	4.9694
	22.3523	4.9662
	22.3873	4.9687
	22.4223	4.9678
	22.4583	4.9637
	22.4933	4.9638
	22.5283	4.9643
	22.5643	4.9687
	22.5983	4.9683
	22.6333	4.9617
	22.6683	4.9677
	22.7033	4.9758
	22.7373	4.981
	22.7733	4.9803
	22.8083	4.9854
	22.8443	4.9838
	22.8783	4.977
	22.9133	4.9761
	22.9483	4.9749
	22.9833	4.9718
	23.0183	4.9849
	23.0533	4.9861
	23.0883	4.9727
	23.1243	4.9791
	23.1603	4.9742
	23.1953	4.9873
	23.2303	4.988
	23.2653	4.9752
	23.2993	4.9854
	23.3343	4.9944
	23.3693	4.9947
	23.4053	4.9888
	23.4404	4.9953
	23.4764	4.992
	23.5104	4.9984
	23.5454	4.9944
	23.5804	4.9926
	23.6154	4.9887
	23.6504	4.9863
	23.6854	4.9823
	23.7204	4.9817
	23.7564	4.9832
	23.7924	4.9779
	23.8274	4.9729
	23.8624	4.9709
	23.8974	4.977
	23.9324	4.9715
	23.9674	4.977
	24.0024	4.9758
	24.0384	4.9818
	24.0724	4.9779
	24.1084	4.9741
	24.1444	4.9847
	24.1784	4.985
	24.2134	4.9852
	24.2484	4.9733
	24.2844	4.9769
	24.3184	4.9741
	24.3544	4.9674
	24.3904	4.9763
	24.4264	4.9687
	24.4604	4.9683
	24.4954	4.9618
	24.5304	4.9648
	24.5654	4.9612
	24.6014	4.9591
	24.6374	4.9579
	24.6714	4.9449
	24.7064	4.9471
	24.7414	4.9525
	24.7764	4.9396
	24.8114	4.9436
	24.8464	4.9489
	24.8814	4.9614
	24.9164	4.9609
	24.9524	4.9628
	24.9864	4.9673
	25.0214	4.9594
	25.0564	4.9563
	25.0914	4.955
	25.1264	4.9578
	25.1614	4.964
	25.1955	4.9567
	25.2305	4.9649
	25.2645	4.9564
	25.2995	4.9693
	25.3345	4.9688
	25.3695	4.9712
	25.4045	4.9609
	25.4395	4.9725
	25.4745	4.9647
	25.5085	4.9731
	25.5435	4.9604
	25.5775	4.9636
	25.6125	4.971
	25.6475	4.9749
	25.6825	4.9793
	25.7185	4.9811
	25.7535	4.9767
	25.7885	4.9776
	25.8235	4.98
	25.8585	4.9849
	25.8935	4.9843
	25.9285	4.9807
	25.9635	4.9774
	25.9975	4.9717
	26.0325	4.9814
	26.0675	4.9815
	26.1025	4.9794
	26.1375	4.9834
	26.1725	4.9855
	26.2075	4.9786
	26.2425	4.9883
	26.2775	4.9839
	26.3125	4.9835
	26.3485	4.9842
	26.3835	4.9808
	26.4185	4.9929
	26.4535	4.9786
	26.4885	4.9751
	26.5235	4.9662
	26.5585	4.9675
	26.5935	4.959
	26.6285	4.9534
	26.6645	4.9628
	26.6995	4.9641
	26.7355	4.9667
	26.7705	4.9564
	26.8045	4.962
	26.8395	4.9595
	26.8745	4.9556
	26.9095	4.9669
	26.9446	4.9625
	26.9806	4.965
	27.0156	4.964
	27.0506	4.9632
	27.0856	4.9658
	27.1206	4.9498
	27.1556	4.9625
	27.1906	4.9621
	27.2256	4.9644
	27.2606	4.9667
	27.2966	4.961
	27.3316	4.9612
	27.3666	4.9642
	27.4016	4.9607
	27.4366	4.9593
	27.4716	4.944
	27.5066	4.9565
	27.5416	4.9505
	27.5766	4.955
	27.6126	4.9548
	27.6476	4.9561
	27.6836	4.956
	27.7186	4.9515
	27.7536	4.947
	27.7886	4.9508
	27.8236	4.9452
	27.8576	4.9496
	27.8926	4.9421
	27.9286	4.9493
	27.9646	4.9528
	27.9996	4.9496
	28.0346	4.9446
	28.0696	4.9535
	28.1046	4.9473
	28.1396	4.9446
	28.1746	4.9457
	28.2106	4.9504
	28.2456	4.945
	28.2816	4.9452
	28.3166	4.9463
	28.3516	4.9518
	28.3856	4.9525
	28.4206	4.9514
	28.4556	4.9681
	28.4906	4.9698
	28.5266	4.9747
	28.5616	4.9752
	28.5966	4.9636
	28.6316	4.9696
	28.6666	4.9786
	28.7017	4.9691
	28.7367	4.9666
	28.7717	4.9709
	28.8057	4.9725
	28.8407	4.9681
	28.8757	4.9684
	28.9107	4.9645
	28.9457	4.9658
	28.9807	4.9679
	29.0157	4.9708
	29.0507	4.9683
	29.0857	4.9803
	29.1207	4.9701
	29.1557	4.9669
	29.1917	4.9584
	29.2267	4.9731
	29.2617	4.9712
	29.2967	4.9731
	29.3317	4.9701
	29.3667	4.9673
	29.4017	4.9645
	29.4357	4.9694
	29.4707	4.9691
	29.5057	4.9679
	29.5417	4.9557
	29.5757	4.9542
	29.6117	4.9493
	29.6477	4.9495
	29.6817	4.9554
	29.7167	4.9638
	29.7517	4.9562
	29.7877	4.9456
	29.8227	4.9489
	29.8577	4.9526
	29.8927	4.9521
	29.9277	4.9609
	29.9627	4.951
	29.9977	4.9449
	30.0327	4.95
	30.0677	4.9536
	30.1027	4.9525
	30.1377	4.9583
	30.1737	4.964
	30.2097	4.9632
	30.2447	4.962
	30.2797	4.9673
	30.3147	4.9711
	30.3497	4.9707
	30.3847	4.9656
	30.4197	4.9681
	30.4558	4.9636
	30.4898	4.957
	30.5248	4.9569
	30.5598	4.9666
	30.5938	4.9678
	30.6288	4.9544
	30.6638	4.9568
	30.6988	4.9607
	30.7338	4.9571
	30.7688	4.9704
	30.8048	4.9667
	30.8408	4.9551
	30.8748	4.9602
	30.9098	4.9525
	30.9448	4.9618
	30.9798	4.9666
	31.0148	4.961
	31.0488	4.9698
	31.0838	4.9707
	31.1198	4.9631
	31.1548	4.9607
	31.1888	4.9653
	31.2238	4.9538
	31.2588	4.9576
	31.2938	4.9621
	31.3288	4.9637
	31.3638	4.9716
	31.3988	4.9636
	31.4338	4.97
	31.4698	4.9661
	31.5048	4.9729
	31.5408	4.9763
	31.5748	4.9763
	31.6098	4.9741
	31.6448	4.9672
	31.6798	4.9605
	31.7148	4.9661
	31.7498	4.959
	31.7858	4.9659
	31.8208	4.9623
	31.8568	4.9664
	31.8908	4.9653
	31.9258	4.9745
	31.9608	4.9688
	31.9958	4.9622
	32.0308	4.956
	32.0648	4.9591
	32.0998	4.9588
	32.1358	4.9579
	32.1708	4.9585
	32.2059	4.9589
	32.2409	4.9525
	32.2759	4.9503
	32.3109	4.9513
	32.3459	4.952
	32.3809	4.951
	32.4149	4.9452
	32.4499	4.939
	32.4849	4.9384
	32.5209	4.9404
	32.5549	4.9392
	32.5899	4.9458
	32.6249	4.9412
	32.6599	4.9436
	32.6949	4.9435
	32.7299	4.9426
	32.7649	4.9476
	32.7999	4.9411
	32.8349	4.9426
	32.8699	4.9321
	32.9049	4.9307
	32.9399	4.9305
	32.9749	4.9407
	33.0099	4.955
	33.0449	4.9535
	33.0789	4.9523
	33.1139	4.9508
	33.1499	4.9503
	33.1859	4.9497
	33.2209	4.9563
	33.2559	4.9563
	33.2909	4.962
	33.3259	4.9591
	33.3609	4.9538
	33.3959	4.9609
	33.4309	4.9535
	33.4659	4.9557
	33.5009	4.9589
	33.5359	4.9639
	33.5709	4.9591
	33.6059	4.9544
	33.6409	4.9619
	33.6759	4.9578
	33.7109	4.9561
	33.7469	4.9503
	33.7829	4.9548
	33.8179	4.9549
	33.8529	4.9659
	33.8879	4.9669
	33.9229	4.9681
	33.958	4.9778
	33.993	4.9661
	34.028	4.9752
	34.064	4.9787
	34.098	4.9821
	34.133	4.9829
	34.168	4.9958
	34.203	4.9919
	34.238	4.9906
	34.273	4.9978
	34.308	4.9976
	34.343	4.9956
	34.378	4.982
	34.414	4.9895
	34.449	4.9902
	34.484	4.9921
	34.518	4.9822
	34.553	4.9857
	34.588	4.9855
	34.623	4.988
	34.658	4.9808
	34.693	4.9861
	34.729	4.9809
	34.764	4.987
	34.8	4.9836
	34.834	4.9909
	34.869	4.984
	34.904	4.9837
	34.939	4.9824
	34.974	4.9866
	35.009	4.9968
	35.045	4.9921
	35.08	4.9796
	35.115	4.9877
	35.15	4.9898
	35.184	4.9881
	35.219	4.9884
	35.253	4.9955
	35.288	4.9875
	35.323	4.9889
	35.358	5.004
	35.394	4.9989
	35.43	4.9852
	35.465	4.9742
	35.5	4.9782
	35.535	4.9816
	35.569	4.9756
	35.604	4.9739
	35.639	4.9771
	35.6741	4.982
	35.7091	4.9855
	35.7441	4.9709
	35.7791	4.9745
	35.8141	4.9753
	35.8491	4.9747
	35.8841	4.9741
	35.9191	4.982
	35.9541	4.9848
	35.9891	4.9856
	36.0241	4.9743
	36.0591	4.9817
	36.0941	4.9729
	36.1291	4.9744
	36.1641	4.9691
	36.1991	4.9749
	36.2341	4.9796
	36.2681	4.9789
	36.3031	4.9848
	36.3381	4.9795
	36.3731	4.9794
	36.4091	4.9777
	36.4451	4.9833
	36.4801	4.9822
	36.5161	4.9755
	36.5501	4.9703
	36.5851	4.9616
	36.6201	4.9656
	36.6551	4.9695
	36.6901	4.9723
	36.7251	4.9744
	36.7601	4.9695
	36.7951	4.9682
	36.8301	4.9659
	36.8651	4.955
	36.9001	4.9551
	36.9351	4.9538
	36.9701	4.9535
	37.0061	4.9527
	37.0411	4.9557
	37.0761	4.946
	37.1111	4.9587
	37.1461	4.9515
	37.1811	4.952
	37.2161	4.9569
	37.2511	4.9438
	37.2861	4.9534
	37.3211	4.949
	37.3581	4.9478
	37.3931	4.9602
	37.4282	4.9576
	37.4632	4.9637
	37.4982	4.9636
	37.5332	4.9639
	37.5682	4.9637
	37.6042	4.9661
	37.6402	4.967
	37.6752	4.9728
	37.7102	4.9594
	37.7452	4.9675
	37.7802	4.9616
	37.8152	4.964
	37.8502	4.9613
	37.8852	4.9635
	37.9212	4.9587
	37.9562	4.9636
	37.9912	4.9499
	38.0262	4.951
	38.0612	4.9512
	38.0962	4.95
	38.1312	4.9483
	38.1652	4.9529
	38.2002	4.9569
	38.2352	4.954
	38.2702	4.954
	38.3052	4.9614
	38.3402	4.9597
	38.3742	4.96
	38.4092	4.9672
	38.4442	4.9709
	38.4782	4.9687
	38.5132	4.9677
	38.5472	4.9626
	38.5822	4.952
	38.6172	4.9541
	38.6532	4.9421
	38.6882	4.9385
	38.7232	4.9498
	38.7582	4.9449
	38.7922	4.9322
	38.8272	4.9303
	38.8622	4.9396
	38.8972	4.9449
	38.9322	4.9377
	38.9682	4.9417
	39.0032	4.9477
	39.0392	4.9462
	39.0752	4.947
	39.1092	4.9509
	39.1442	4.9455
	39.1793	4.9567
	39.2143	4.9571
	39.2493	4.9574
	39.2843	4.9535
	39.3193	4.9606
	39.3543	4.9625
	39.3893	4.9641
	39.4243	4.9713
	39.4593	4.9694
	39.4943	4.9683
	39.5293	4.9676
	39.5643	4.9692
	39.6003	4.966
	39.6353	4.9735
	39.6703	4.9747
	39.7053	4.9727
	39.7403	4.9752
	39.7753	4.9788
	39.8103	4.9888
	39.8453	4.9846
	39.8803	4.989
	39.9163	4.978
	39.9523	4.9802
	39.9863	4.986
	40.0213	4.9916
	40.0563	4.9868
	40.0913	4.9858
	40.1263	4.9828
	40.1613	4.9873
	40.1963	4.986
	40.2323	4.976
	40.2673	4.9893
	40.3033	4.9887
	40.3373	4.9948
	40.3723	4.995
	40.4073	4.9871
	40.4423	4.9905
	40.4773	4.9884
	40.5123	4.9838
	40.5483	4.9918
	40.5843	4.9805
	40.6193	4.9832
	40.6543	4.9823
	40.6893	4.9816
	40.7243	4.9918
	40.7593	4.9769
	40.7943	4.988
	40.8293	4.9784
	40.8643	4.9893
	40.8993	4.9856
	40.9354	4.9894
	40.9704	4.9905
	41.0054	4.9873
	41.0404	4.9844
	41.0754	4.9845
	41.1104	4.9819
	41.1454	4.978
	41.1804	4.9804
	41.2164	4.9817
	41.2504	4.9817
	41.2854	4.9749
	41.3204	4.9714
	41.3554	4.9685
	41.3904	4.9717
	41.4244	4.9757
	41.4584	4.9693
	41.4934	4.9649
	41.5284	4.9625
	41.5634	4.9564
	41.5984	4.9507
	41.6334	4.9506
	41.6684	4.9565
	41.7034	4.9674
	41.7374	4.9664
	41.7714	4.9753
	41.8064	4.9773
	41.8404	4.9806
	41.8754	4.9821
	41.9114	4.9838
	41.9474	4.9806
	41.9824	4.9889
	42.0174	4.988
	42.0524	4.9841
	42.0874	4.9841
	42.1224	4.9784
	42.1574	4.9646
	42.1914	4.9517
	42.2274	4.9603
	42.2614	4.9509
	42.2964	4.9524
	42.3314	4.9447
	42.3664	4.9566
	42.4014	4.9568
	42.4364	4.9438
	42.4714	4.9465
	42.5064	4.9441
	42.5414	4.9484
	42.5764	4.9482
	42.6114	4.9526
	42.6464	4.9535
	42.6815	4.9377
	42.7165	4.9378
	42.7515	4.9434
	42.7865	4.9417
	42.8225	4.9494
	42.8565	4.9545
	42.8915	4.9536
	42.9265	4.9607
	42.9625	4.9591
	42.9975	4.9565
	43.0315	4.963
	43.0665	4.9504
	43.1015	4.9545
	43.1365	4.9457
	43.1715	4.956
	43.2065	4.9552
	43.2415	4.9614
	43.2765	4.959
	43.3115	4.9592
	43.3465	4.9564
	43.3815	4.9574
	43.4165	4.948
	43.4515	4.9541
	43.4865	4.9597
	43.5215	4.9595
	43.5575	4.9615
	43.5915	4.9553
	43.6265	4.9502
	43.6615	4.9515
	43.6965	4.9506
	43.7315	4.9579
	43.7655	4.9645
	43.8005	4.9554
	43.8355	4.9712
	43.8705	4.974
	43.9065	4.9689
	43.9415	4.9725
	43.9775	4.9729
	44.0115	4.9736
	44.0465	4.9842
	44.0815	4.9867
	44.1165	4.9701
	44.1515	4.9665
	44.1865	4.9711
	44.2225	4.9746
	44.2585	4.9706
	44.2935	4.9734
	44.3285	4.9733
	44.3635	4.9756
	44.3985	4.9753
	44.4336	4.9657
	44.4686	4.9708
	44.5036	4.9632
	44.5396	4.9621
	44.5746	4.9633
	44.6096	4.9583
	44.6446	4.9613
	44.6796	4.9526
	44.7146	4.9519
	44.7496	4.9529
	44.7846	4.9438
	44.8206	4.9379
	44.8556	4.9431
	44.8916	4.9523
	44.9256	4.9471
	44.9606	4.945
	44.9956	4.9463
	45.0306	4.9471
	45.0656	4.9444
	45.1006	4.9468
	45.1366	4.9449
	45.1716	4.9452
	45.2066	4.954
	45.2416	4.954
	45.2766	4.9532
	45.3116	4.9566
	45.3466	4.954
	45.3806	4.9504
	45.4156	4.9554
	45.4506	4.965
	45.4866	4.9559
	45.5216	4.9596
	45.5566	4.9589
	45.5916	4.9573
	45.6266	4.9536
	45.6616	4.9489
	45.6966	4.9569
	45.7316	4.9644
	45.7666	4.9671
	45.8026	4.9552
	45.8376	4.9583
	45.8726	4.9516
	45.9076	4.9584
	45.9436	4.9562
	45.9786	4.9526
	46.0146	4.9535
	46.0496	4.9591
	46.0856	4.9556
	46.1196	4.9576
	46.1546	4.9574
	46.1897	4.9626
	46.2247	4.9623
	46.2597	4.9665
	46.2947	4.9594
	46.3297	4.9452
	46.3647	4.9568
	46.3997	4.9594
	46.4347	4.9556
	46.4697	4.9604
	46.5047	4.9551
	46.5397	4.9551
	46.5737	4.9524
	46.6087	4.9512
	46.6437	4.9444
	46.6787	4.9407
	46.7137	4.9523
	46.7497	4.9489
	46.7847	4.9417
	46.8197	4.948
	46.8547	4.9351
	46.8897	4.9459
	46.9247	4.9331
	46.9597	4.9246
	46.9947	4.9431
	47.0297	4.9382
	47.0657	4.9473
	47.1017	4.9502
	47.1367	4.9514
	47.1717	4.9576
	47.2067	4.9523
	47.2417	4.9538
	47.2767	4.9587
	47.3127	4.9565
	47.3477	4.9507
	47.3827	4.9497
	47.4177	4.9566
	47.4527	4.9553
	47.4877	4.967
	47.5217	4.9737
	47.5567	4.9646
	47.5917	4.9754
	47.6267	4.97
	47.6617	4.9669
	47.6977	4.9698
	47.7337	4.9743
	47.7687	4.9655
	47.8027	4.9578
	47.8397	4.9548
	47.8747	4.949
	47.9097	4.9513
	47.9448	4.9635
	47.9808	4.9561
	48.0158	4.9444
	48.0518	4.9467
	48.0858	4.9451
	48.1208	4.9367
	48.1558	4.9387
	48.1908	4.9483
	48.2258	4.9541
	48.2608	4.9613
	48.2958	4.9596
	48.3308	4.952
	48.3658	4.9508
	48.4008	4.9562
	48.4358	4.9479
	48.4708	4.9459
	48.5058	4.9396
	48.5408	4.93
	48.5758	4.9413
	48.6118	4.9423
	48.6468	4.9439
	48.6818	4.937
	48.7168	4.937
	48.7518	4.9377
	48.7858	4.9344
	48.8208	4.9411
	48.8558	4.933
	48.8908	4.9371
	48.9258	4.9333
	48.9618	4.9318
	48.9968	4.9304
	49.0318	4.921
	49.0668	4.9222
	49.1018	4.9249
	49.1368	4.9242
	49.1718	4.9174
	49.2068	4.9151
	49.2418	4.9157
	49.2768	4.9165
	49.3118	4.9206
	49.3478	4.918
	49.3828	4.9172
	49.4178	4.9241
	49.4528	4.9315
	49.4878	4.922
	49.5228	4.9384
	49.5588	4.9319
	49.5938	4.9379
	49.6298	4.9397
	49.6639	4.9461
	49.6989	4.9442
	49.7339	4.9519
	49.7689	4.9523
	49.8039	4.9518
	49.8389	4.9442
	49.8739	4.944
	49.9099	4.9529
	49.9449	4.9486
	49.9789	4.9513
	50.0139	4.9592
	50.0489	4.9489
	50.0839	4.9522
	50.1199	4.9429
	50.1559	4.9436
	50.1919	4.9451
	50.2249	4.9418
	50.2599	4.9286
	50.2949	4.9302
	50.3299	4.9309
	50.3649	4.9308
	50.3999	4.9202
	50.4349	4.9198
	50.4689	4.9165
	50.5039	4.9228
	50.5399	4.919
	50.5749	4.9092
	50.6109	4.9005
	50.6449	4.8972
	50.6799	4.8898
	50.7149	4.8696
	50.7499	4.859
	50.7849	4.8427
	50.8199	4.8314
	50.8559	4.8162
	50.8909	4.8048
	50.9269	4.7942
	50.9609	4.7785
	50.9959	4.748
	51.0309	4.7318
	51.0659	4.6939
	51.1019	4.6601
	51.1359	4.6298
	51.1719	4.6026
	51.2069	4.5658
	51.2429	4.5441
	51.2779	4.5078
	51.3119	4.4712
	51.3469	4.4535
	51.3819	4.4272
	51.417	4.397
	51.452	4.3753
	51.488	4.3521
	51.523	4.3172
	51.559	4.2931
	51.594	4.2507
	51.629	4.2225
	51.663	4.1808
	51.698	4.1553
	51.733	4.1251
	51.768	4.0962
	51.804	4.052
	51.84	4.0247
	51.875	3.9902
	51.91	3.9743
	51.945	3.9456
	51.98	3.9115
	52.015	3.8845
	52.05	3.8642
	52.085	3.8456
	52.121	3.8222
	52.156	3.7978
	52.192	3.7737
	52.228	3.7459
	52.262	3.7287
	52.297	3.6941
	52.332	3.6738
	52.367	3.6564
	52.402	3.6328
	52.437	3.6126
	52.472	3.6003
	52.506	3.5826
	52.541	3.5742
	52.576	3.5618
	52.61	3.541
	52.645	3.5275
	52.68	3.5106
	52.715	3.4979
	52.751	3.4821
	52.786	3.4599
	52.822	3.4484
	52.856	3.4379
	52.891	3.4265
	52.926	3.4158
	52.96	3.41
	52.995	3.4009
	53.03	3.3912
	53.065	3.3856
	53.101	3.3805
	53.136	3.378
	53.1721	3.3722
	53.2061	3.3699
	53.2411	3.3606
	53.2761	3.3621
	53.3111	3.3579
	53.3461	3.3558
	53.3811	3.3487
	53.4171	3.3515
	53.4521	3.3489
	53.4871	3.342
	53.5211	3.3485
	53.5561	3.341
	53.5911	3.3316
	53.6251	3.3341
	53.6601	3.336
	53.6951	3.3376
	53.7311	3.3406
	53.7661	3.3436
	53.8011	3.3416
	53.8361	3.3352
	53.8711	3.3362
	53.9061	3.338
	53.9411	3.3382
	53.9761	3.3383
	54.0111	3.338
	54.0461	3.3407
	54.0811	3.3364
	54.1161	3.3328
	54.1521	3.3356
	54.1871	3.3343
	54.2211	3.3322
	54.2561	3.3367
	54.2901	3.3354
	54.3251	3.3384
	54.3601	3.3352
	54.3951	3.3338
	54.4311	3.3382
	54.4651	3.3338
	54.5011	3.339
	54.5361	3.3396
	54.5711	3.3394
	54.6061	3.3459
	54.6411	3.3386
	54.6761	3.341
	54.7111	3.3414
	54.7471	3.3416
	54.7831	3.3395
	54.8181	3.339
	54.8531	3.3374
	54.8881	3.3342
	54.9232	3.3394
	54.9582	3.3366
	54.9922	3.3365
	55.0272	3.3431
	55.0622	3.3353
	55.0972	3.3352
	55.1322	3.341
	55.1672	3.3433
	55.2022	3.3414
	55.2372	3.3429
	55.2722	3.3433
	55.3062	3.3422
	55.3412	3.3458
	55.3762	3.3437
	55.4122	3.3434
	55.4482	3.3434
	55.4832	3.3427
	55.5182	3.3466
	55.5532	3.3462
	55.5872	3.3435
	55.6222	3.3436
	55.6572	3.3455
	55.6922	3.3423
	55.7282	3.3387
	55.7632	3.3436
	55.7982	3.3489
	55.8332	3.3416
	55.8672	3.3453
	55.9022	3.3429
	55.9372	3.3439
	55.9722	3.3464
	56.0072	3.3462
	56.0422	3.3461
	56.0772	3.3475
	56.1122	3.3468
	56.1472	3.34
	56.1822	3.339
	56.2182	3.3372
	56.2532	3.3369
	56.2872	3.3322
	56.3222	3.3342
	56.3572	3.3311
	56.3922	3.3286
	56.4272	3.3327
	56.4622	3.3304
	56.4972	3.3312
	56.5322	3.3293
	56.5672	3.3307
	56.6022	3.3244
	56.6372	3.3266
	56.6723	3.3262
	56.7073	3.3268
	56.7433	3.3284
	56.7793	3.3247
	56.8133	3.3252
	56.8483	3.3258
	56.8833	3.3255
	56.9183	3.3243
	56.9543	3.3197
	56.9883	3.3212
	57.0243	3.3204
	57.0593	3.3138
	57.0953	3.3141
	57.1303	3.3123
	57.1653	3.3095
	57.2013	3.3101
	57.2353	3.311
	57.2703	3.3068
	57.3063	3.3069
	57.3413	3.3043
	57.3773	3.3069
	57.4123	3.3042
	57.4473	3.3061
	57.4823	3.3121
	57.5173	3.3109
	57.5513	3.308
	57.5863	3.3126
	57.6213	3.3119
	57.6573	3.3092
	57.6913	3.3122
	57.7273	3.3144
	57.7623	3.3198
	57.7973	3.3148
	57.8323	3.3157
	57.8673	3.3115
	57.9023	3.3135
	57.9383	3.3159
	57.9733	3.3153
	58.0093	3.3144
	58.0443	3.3191
	58.0793	3.3256
	58.1143	3.3301
	58.1493	3.3315
	58.1843	3.3344
	58.2193	3.331
	58.2553	3.3308
	58.2913	3.3273
	58.3263	3.3265
	58.3613	3.325
	58.3963	3.3229
	58.4314	3.3237
	58.4664	3.3256
	58.5014	3.3219
	58.5374	3.3218
	58.5724	3.3181
	58.6074	3.3199
	58.6424	3.3218
	58.6774	3.3247
	58.7124	3.319
	58.7474	3.3248
	58.7824	3.3226
	58.8174	3.3189
	58.8534	3.3164
	58.8884	3.315
	58.9234	3.316
	58.9584	3.3166
	58.9934	3.3181
	59.0284	3.3206
	59.0634	3.3105
	59.0984	3.3123
	59.1334	3.3125
	59.1694	3.318
	59.2044	3.3141
	59.2394	3.3146
	59.2754	3.3156
	59.3104	3.3168
	59.3454	3.3176
	59.3804	3.3185
	59.4164	3.3156
	59.4524	3.3136
	59.4884	3.3209
	59.5234	3.3175
	59.5574	3.3175
	59.5924	3.3132
	59.6274	3.3102
	59.6614	3.3091
	59.6964	3.3038
	59.7314	3.3029
	59.7664	3.3025
	59.8014	3.2987
	59.8364	3.2977
	59.8714	3.3011
	59.9064	3.3095
	59.9414	3.3067
	59.9764	3.3056
	60.0114	3.3058
	60.0464	3.3117
	60.0814	3.3111
	60.1174	3.319
	60.1515	3.315
	60.1865	3.3174
	60.2215	3.3231
	60.2565	3.3226
	60.2915	3.3245
	60.3265	3.3311
	60.3615	3.3277
	60.3945	3.336
	60.4285	3.3331
	60.4635	3.3352
	60.4985	3.3319
	60.5335	3.3349
	60.5695	3.3368
	60.6035	3.3336
	60.6385	3.3355
	60.6735	3.3362
	60.7085	3.3356
	60.7445	3.3313
	60.7785	3.3377
	60.8135	3.3303
	60.8495	3.331
	60.8855	3.3274
	60.9205	3.3256
	60.9555	3.3274
	60.9905	3.323
	61.0255	3.322
	61.0615	3.3231
	61.0975	3.3249
	61.1325	3.326
	61.1685	3.3263
	61.2035	3.3272
	61.2385	3.3208
	61.2735	3.3192
	61.3085	3.3168
	61.3435	3.3171
	61.3785	3.3097
	61.4145	3.3119
	61.4505	3.3148
	61.4855	3.3145
	61.5205	3.3158
	61.5555	3.3122
	61.5905	3.3209
	61.6255	3.3218
	61.6605	3.3237
	61.6965	3.3204
	61.7315	3.3249
	61.7675	3.3217
	61.8025	3.3198
	61.8375	3.3202
	61.8725	3.3179
	61.9076	3.3185
	61.9426	3.3226
	61.9776	3.3235
	62.0126	3.3205
	62.0476	3.3176
	62.0826	3.3166
	62.1176	3.3173
	62.1526	3.3153
	62.1876	3.3156
	62.2216	3.3131
	62.2566	3.3188
	62.2916	3.3224
	62.3276	3.3184
	62.3626	3.3206
	62.3996	3.3183
	62.4336	3.3185
	62.4686	3.3258
	62.5036	3.3277
	62.5386	3.3319
	62.5726	3.3336
	62.6076	3.3268
	62.6426	3.3242
	62.6776	3.3224
	62.7126	3.3238
	62.7476	3.323
	62.7826	3.3223
	62.8176	3.3234
	62.8526	3.3264
	62.8876	3.3217
	62.9226	3.3162
	62.9576	3.3163
	62.9936	3.3141
	63.0286	3.3197
	63.0636	3.3177
	63.0986	3.3152
	63.1336	3.3106
	63.1686	3.3153
	63.2036	3.3232
	63.2386	3.3162
	63.2736	3.3178
	63.3086	3.3173
	63.3436	3.3199
	63.3796	3.3187
	63.4146	3.3173
	63.4496	3.3191
	63.4846	3.3202
	63.5196	3.3267
	63.5546	3.3281
	63.5896	3.3265
	63.6256	3.3285
	63.6597	3.3277
	63.6947	3.3264
	63.7297	3.3299
	63.7647	3.3315
	63.7997	3.3325
	63.8337	3.333
	63.8687	3.3367
	63.9037	3.3336
	63.9387	3.3401
	63.9747	3.3374
	64.0097	3.3461
	64.0447	3.3439
	64.0797	3.3394
	64.1147	3.3447
	64.1497	3.3395
	64.1847	3.3432
	64.2197	3.3417
	64.2547	3.3436
	64.2907	3.3448
	64.3257	3.3481
	64.3607	3.348
	64.3957	3.3465
	64.4317	3.3456
	64.4667	3.3419
	64.5017	3.3471
	64.5357	3.3471
	64.5707	3.3426
	64.6067	3.3416
	64.6427	3.3411
	64.6777	3.3408
	64.7127	3.3373
	64.7477	3.3317
	64.7827	3.331
	64.8177	3.3317
	64.8527	3.3273
	64.8887	3.3267
	64.9237	3.333
	64.9587	3.3244
	64.9937	3.3292
	65.0277	3.3242
	65.0627	3.3251
	65.0977	3.3256
	65.1327	3.3263
	65.1677	3.3268
	65.2027	3.3297
	65.2377	3.3248
	65.2727	3.3266
	65.3087	3.3272
	65.3427	3.3221
	65.3777	3.3227
	65.4118	3.3215
	65.4468	3.3183
	65.4818	3.3162
	65.5168	3.3221
	65.5518	3.3196
	65.5868	3.3215
	65.6218	3.3188
	65.6568	3.3111
	65.6918	3.314
	65.7268	3.3121
	65.7618	3.3127
	65.7968	3.3099
	65.8318	3.3124
	65.8668	3.3148
	65.9018	3.3102
	65.9388	3.3128
	65.9728	3.317
	66.0078	3.3124
	66.0428	3.3128
	66.0778	3.3122
	66.1128	3.3107
	66.1478	3.3103
	66.1828	3.3124
	66.2168	3.3164
	66.2528	3.311
	66.2878	3.3138
	66.3228	3.3139
	66.3578	3.3136
	66.3928	3.3113
	66.4278	3.3199
	66.4628	3.3158
	66.4978	3.3173
	66.5328	3.3161
	66.5688	3.3188
	66.6048	3.3237
	66.6388	3.3263
	66.6738	3.3191
	66.7088	3.3215
	66.7428	3.3158
	66.7778	3.3191
	66.8128	3.311
	66.8478	3.3087
	66.8838	3.3173
	66.9188	3.3108
	66.9548	3.3081
	66.9888	3.308
	67.0238	3.3009
	67.0588	3.305
	67.0938	3.3046
	67.1288	3.3034
	67.1639	3.2987
	67.1999	3.2999
	67.2349	3.2976
	67.2699	3.2968
	67.3049	3.2912
	67.3399	3.2958
	67.3749	3.2919
	67.4099	3.2979
	67.4449	3.2977
	67.4809	3.2999
	67.5159	3.2991
	67.5519	3.2944
	67.5869	3.2974
	67.6219	3.2957
	67.6569	3.2935
	67.6909	3.2976
	67.7259	3.3025
	67.7619	3.2993
	67.7969	3.2975
	67.8329	3.3054
	67.8689	3.3067
	67.9029	3.3068
	67.9379	3.3079
	67.9729	3.3059
	68.0079	3.3108
	68.0429	3.3107
	68.0779	3.3093
	68.1149	3.3104
	68.1499	3.3117
	68.1849	3.3148
	68.2189	3.312
	68.2539	3.3093
	68.2889	3.3125
	68.3239	3.3117
	68.3589	3.3123
	68.3939	3.3167
	68.4299	3.3174
	68.4639	3.3154
	68.4999	3.3158
	68.5349	3.3137
	68.5699	3.3108
	68.6049	3.3113
	68.6399	3.3111
	68.6749	3.3029
	68.7099	3.3016
	68.7459	3.302
	68.7809	3.2997
	68.8169	3.3002
	68.8519	3.2984
	68.8869	3.2937
	68.922	3.2986
	68.957	3.2962
	68.992	3.2959
	69.026	3.2925
	69.062	3.2944
	69.097	3.2955
	69.133	3.3012
	69.168	3.2945
	69.203	3.2927
	69.238	3.2956
	69.273	3.3004
	69.308	3.296
	69.343	3.3045
	69.379	3.294
	69.415	3.3019
	69.449	3.3019
	69.484	3.3028
	69.52	3.3053
	69.554	3.3031
	69.589	3.3005
	69.624	3.2943
	69.659	3.29
	69.695	3.2912
	69.729	3.2938
	69.764	3.2961
	69.799	3.2917
	69.834	3.2938
	69.869	3.3033
	69.904	3.2961
	69.939	3.301
	69.974	3.3014
	70.01	3.3045
	70.044	3.3064
[truncated: 1,423 more rows]

## Sheet: B
	Time, s	Length, µm
	0	4.9712
	0.035	4.9811
	0.07	4.9807
	0.105	4.971
	0.14	4.9794
	0.175	4.981
	0.21	4.9707
	0.245	4.9747
	0.28	4.9743
	0.315	4.9699
	0.35	4.974
	0.385	4.9723
	0.42	4.9723
	0.455	4.9665
	0.49	4.971
	0.525	4.9721
	0.56	4.9737
	0.595	4.9701
	0.63	4.9707
	0.665	4.9729
	0.701	4.972
	0.7351	4.986
	0.7701	4.972
	0.8041	4.9677
	0.8391	4.9801
	0.8741	4.9791
	0.9091	4.9747
	0.9441	4.9767
	0.9791	4.9769
	1.0161	4.9813
	1.0501	4.9837
	1.0861	4.9806
	1.1211	4.9697
	1.1561	4.9689
	1.1911	4.9795
	1.2271	4.9704
	1.2621	4.9712
	1.2971	4.9799
	1.3331	4.9828
	1.3691	4.9831
	1.4051	4.9695
	1.4391	4.9841
	1.4741	4.9859
	1.5091	4.9816
	1.5441	4.9801
	1.5791	4.9779
	1.6141	4.989
	1.6491	4.9878
	1.6841	4.98
	1.7191	4.9709
	1.7541	4.9677
	1.7891	4.9573
	1.8241	4.9558
	1.8591	4.9546
	1.8941	4.9517
	1.9281	4.9628
	1.9641	4.967
	2.0001	4.9731
	2.0351	4.971
	2.0701	4.9675
	2.1051	4.9531
	2.1401	4.9553
	2.1751	4.9573
	2.2101	4.9582
	2.2451	4.9626
	2.2801	4.9554
	2.3151	4.9581
	2.3501	4.9614
	2.3851	4.9682
	2.4211	4.9665
	2.4552	4.9598
	2.4902	4.9699
	2.5242	4.9642
	2.5592	4.9587
	2.5952	4.9599
	2.6302	4.9519
	2.6652	4.9423
	2.7002	4.9519
	2.7352	4.9633
	2.7702	4.9692
	2.8042	4.9695
	2.8392	4.9726
	2.8742	4.9721
	2.9092	4.9675
	2.9442	4.9686
	2.9792	4.9661
	3.0142	4.9592
	3.0492	4.9602
	3.0832	4.9514
	3.1182	4.9508
	3.1532	4.9484
	3.1882	4.9455
	3.2232	4.9406
	3.2582	4.9476
	3.2932	4.9412
	3.3282	4.953
	3.3632	4.9428
	3.3972	4.9557
	3.4322	4.9565
	3.4672	4.9445
	3.5022	4.9492
	3.5372	4.945
	3.5722	4.9544
	3.6082	4.9505
	3.6432	4.9583
	3.6782	4.9477
	3.7132	4.9604
	3.7482	4.9658
	3.7832	4.9667
	3.8182	4.9732
	3.8532	4.9716
	3.8882	4.9743
	3.9232	4.9633
	3.9592	4.9652
	3.9952	4.9642
	4.0292	4.9681
	4.0642	4.9621
	4.0992	4.9681
	4.1342	4.9655
	4.1682	4.9681
	4.2033	4.9723
	4.2383	4.9719
	4.2733	4.9622
	4.3083	4.9603
	4.3433	4.9629
	4.3783	4.9633
	4.4133	4.9579
	4.4483	4.9636
	4.4833	4.9691
	4.5193	4.9575
	4.5543	4.9648
	4.5893	4.9652
	4.6243	4.9615
	4.6603	4.9641
	4.6943	4.9604
	4.7293	4.9536
	4.7643	4.9628
	4.7993	4.9618
	4.8343	4.96
	4.8693	4.9618
	4.9043	4.9575
	4.9393	4.9579
	4.9743	4.9619
	5.0103	4.9656
	5.0453	4.9599
	5.0803	4.9665
	5.1143	4.9642
	5.1493	4.9715
	5.1843	4.9734
	5.2193	4.974
	5.2543	4.9723
	5.2893	4.978
	5.3253	4.9758
	5.3603	4.971
	5.3943	4.9733
	5.4293	4.9758
	5.4643	4.9778
	5.4993	4.9788
	5.5343	4.9851
	5.5703	4.9844
	5.6053	4.9797
	5.6413	4.9833
	5.6753	4.9796
	5.7103	4.9824
	5.7453	4.9822
	5.7803	4.975
	5.8153	4.9908
	5.8503	4.9752
	5.8853	4.9802
	5.9213	4.9831
	5.9564	4.9701
	5.9914	4.9797
	6.0264	4.9749
	6.0614	4.9804
	6.0964	4.9872
	6.1314	4.9878
	6.1664	4.9873
	6.2014	4.9912
	6.2374	4.9938
	6.2724	4.9953
	6.3074	4.9878
	6.3424	4.9966
	6.3774	4.9862
	6.4124	4.9929
	6.4474	4.9874
	6.4824	4.9883
	6.5184	4.9916
	6.5544	4.9899
	6.5894	4.9904
	6.6244	4.9871
	6.6604	4.9812
	6.6954	4.9701
	6.7304	4.9834
	6.7644	4.975
	6.7994	4.9801
	6.8354	4.9776
	6.8704	4.9746
	6.9054	4.9714
	6.9404	4.9751
	6.9754	4.9739
	7.0104	4.9723
	7.0454	4.9643
	7.0804	4.9628
	7.1154	4.9565
	7.1514	4.9657
	7.1854	4.9675
	7.2204	4.9682
	7.2554	4.971
	7.2904	4.9667
	7.3254	4.9757
	7.3604	4.9673
	7.3954	4.9687
	7.4304	4.972
	7.4664	4.9683
	7.5014	4.9667
	7.5374	4.9592
	7.5734	4.9631
	7.6074	4.9644
	7.6424	4.961
	7.6774	4.9639
	7.7125	4.9695
	7.7475	4.9756
	7.7825	4.9748
	7.8175	4.9741
	7.8525	4.9736
	7.8875	4.9765
	7.9215	4.9627
	7.9565	4.9591
	7.9915	4.9579
	8.0265	4.9363
	8.0615	4.9446
	8.0955	4.9503
	8.1305	4.9531
	8.1665	4.9559
	8.2015	4.9651
	8.2365	4.9652
	8.2715	4.9642
	8.3065	4.9745
	8.3405	4.9759
	8.3755	4.9781
	8.4105	4.9771
	8.4455	4.9667
	8.4815	4.9709
	8.5165	4.9754
	8.5515	4.9779
	8.5865	4.9789
	8.6215	4.9842
	8.6565	4.976
	8.6915	4.9695
	8.7265	4.9703
	8.7615	4.9753
	8.7975	4.9689
	8.8335	4.9704
	8.8685	4.9627
	8.9035	4.969
	8.9385	4.9688
	8.9735	4.9678
	9.0085	4.962
	9.0435	4.961
	9.0785	4.9616
	9.1135	4.9613
	9.1495	4.9597
	9.1835	4.9533
	9.2175	4.951
	9.2525	4.9578
	9.2875	4.9588
	9.3225	4.9571
	9.3575	4.9615
	9.3915	4.9571
	9.4265	4.9641
	9.4616	4.9662
	9.4966	4.964
	9.5316	4.9504
	9.5666	4.9621
	9.6016	4.9594
	9.6366	4.9701
	9.6716	4.9721
	9.7066	4.972
	9.7416	4.9838
	9.7776	4.978
	9.8126	4.9821
	9.8486	4.9844
	9.8826	4.9858
	9.9166	4.9805
	9.9516	4.9786
	9.9866	4.9813
	10.0216	4.9867
	10.0566	4.9799
	10.0926	4.9782
	10.1276	4.9815
	10.1636	4.9734
	10.1976	4.9785
	10.2326	4.9736
	10.2676	4.9837
	10.3026	4.98
	10.3366	4.9869
	10.3716	4.9815
	10.4056	4.9842
	10.4406	4.9856
	10.4766	4.9817
	10.5126	4.9769
	10.5466	4.9791
	10.5816	4.9778
	10.6156	4.9849
	10.6496	4.984
	10.6846	4.9814
	10.7196	4.981
	10.7546	4.9879
	10.7896	4.9797
	10.8256	4.9759
	10.8596	4.9706
	10.8956	4.9586
	10.9306	4.9643
	10.9656	4.9687
	11.0006	4.971
	11.0346	4.964
	11.0696	4.9694
	11.1046	4.9661
	11.1396	4.9661
	11.1746	4.9674
	11.2097	4.9727
	11.2447	4.9587
	11.2797	4.9533
	11.3147	4.9629
	11.3497	4.967
	11.3847	4.9594
	11.4197	4.9545
	11.4547	4.965
	11.4907	4.9641
	11.5257	4.9607
	11.5607	4.9611
	11.5957	4.9626
	11.6307	4.957
	11.6657	4.9646
	11.7007	4.9582
	11.7357	4.9627
	11.7707	4.9648
	11.8057	4.9672
	11.8407	4.9798
	11.8757	4.9826
	11.9107	4.9788
	11.9457	4.9717
	11.9807	4.9766
	12.0157	4.976
	12.0507	4.973
	12.0857	4.9739
	12.1207	4.9797
	12.1567	4.9667
	12.1917	4.9736
	12.2257	4.9749
	12.2607	4.9724
	12.2957	4.9797
	12.3307	4.9705
	12.3657	4.9572
	12.4007	4.9674
	12.4357	4.9656
	12.4717	4.9688
	12.5067	4.9699
	12.5417	4.9635
	12.5767	4.9707
	12.6127	4.9638
	12.6477	4.9604
	12.6817	4.9585
	12.7167	4.9671
	12.7517	4.9709
	12.7877	4.9719
	12.8227	4.9773
	12.8577	4.979
	12.8927	4.9796
	12.9277	4.9865
	12.9628	4.9843
	12.9978	4.9756
	13.0328	4.9879
	13.0678	4.9815
	13.1038	4.9859
	13.1378	4.982
	13.1738	4.9776
	13.2088	4.9759
	13.2438	4.9728
	13.2788	4.9741
	13.3138	4.9795
	13.3488	4.9744
	13.3838	4.9842
	13.4198	4.9858
	13.4538	4.9866
	13.4898	4.9933
	13.5238	4.9849
	13.5588	4.976
	13.5938	4.9796
	13.6288	4.9826
	13.6638	4.9834
	13.6988	4.9868
	13.7348	4.9832
	13.7688	4.9849
	13.8038	4.9846
	13.8378	4.981
	13.8728	4.9841
	13.9078	4.9859
	13.9428	4.9766
	13.9778	4.9714
	14.0128	4.9814
	14.0478	4.9844
	14.0838	4.9835
	14.1188	4.9901
	14.1538	4.9846
	14.1888	4.9779
	14.2238	4.975
	14.2588	4.9774
	14.2938	4.9775
	14.3288	4.9788
	14.3638	4.9838
	14.3998	4.9819
	14.4348	4.9729
	14.4708	4.977
	14.5068	4.9716
	14.5418	4.9773
	14.5758	4.9805
	14.6108	4.9805
	14.6458	4.9776
	14.6808	4.9757
	14.7169	4.9742
	14.7519	4.9778
	14.7869	4.9745
	14.8209	4.9789
	14.8559	4.9718
	14.8909	4.9635
	14.9259	4.9729
	14.9609	4.972
	14.9959	4.9726
	15.0319	4.9722
	15.0669	4.9772
	15.1019	4.9697
	15.1369	4.9722
	15.1719	4.98
	15.2069	4.9803
	15.2419	4.9808
	15.2769	4.9722
	15.3119	4.9743
	15.3479	4.9691
	15.3829	4.9758
	15.4179	4.9539
	15.4529	4.9573
	15.4879	4.9506
	15.5229	4.9525
	15.5569	4.9499
	15.5919	4.953
	15.6269	4.9448
	15.6629	4.943
	15.6979	4.9423
	15.7339	4.9479
	15.7689	4.9519
	15.8039	4.9565
	15.8389	4.9516
	15.8739	4.9569
	15.9099	4.9453
	15.9439	4.9551
	15.9799	4.9664
	16.0159	4.9717
	16.0499	4.9691
	16.0849	4.9781
	16.1199	4.9816
	16.1539	4.9821
	16.1889	4.9958
	16.2239	4.9859
	16.2589	4.975
	16.2929	4.9771
	16.3289	4.9768
	16.3639	4.9787
	16.3989	4.9672
	16.4339	4.9657
	16.469	4.9545
	16.504	4.9657
	16.539	4.9635
	16.574	4.9617
	16.609	4.9665
	16.644	4.9771
	16.68	4.9672
	16.715	4.98
	16.751	4.9746
	16.786	4.976
	16.821	4.9842
	16.856	4.9761
	16.891	4.984
	16.928	4.9863
	16.964	4.9784
	17	4.9873
	17.035	4.9776
	17.07	4.9783
	17.105	4.9836
	17.14	4.989
	17.176	4.9883
	17.211	4.992
	17.247	4.9906
	17.282	5.0019
	17.317	4.9979
	17.351	4.9918
	17.386	4.9943
	17.421	4.9987
	17.456	4.9983
	17.491	4.9931
	17.527	5.0005
	17.563	4.9946
	17.597	4.9932
	17.632	4.9767
	17.668	4.986
	17.702	4.9824
	17.737	4.9875
	17.772	4.9831
	17.808	4.9901
	17.843	4.9751
	17.879	4.9828
	17.913	4.9811
	17.948	4.9757
	17.983	4.9721
	18.018	4.9675
	18.053	4.9577
	18.088	4.9554
	18.123	4.9521
	18.158	4.9681
	18.1931	4.9608
	18.2281	4.9609
	18.2631	4.958
	18.2981	4.9637
	18.3331	4.9549
	18.3681	4.9665
	18.4031	4.9671
	18.4391	4.964
	18.4741	4.9636
	18.5101	4.9615
	18.5441	4.9612
	18.5781	4.9621
	18.6131	4.962
	18.6471	4.9601
	18.6821	4.9663
	18.7171	4.9727
	18.7521	4.9701
	18.7871	4.9713
	18.8211	4.973
	18.8561	4.9773
	18.8901	4.9731
	18.9261	4.9756
	18.9601	4.9594
	18.9951	4.9575
	19.0301	4.9669
	19.0641	4.9569
	19.0991	4.9571
	19.1341	4.9613
	19.1691	4.9666
	19.2041	4.9646
	19.2381	4.9599
	19.2731	4.9677
	19.3081	4.9694
	19.3431	4.9755
	19.3771	4.9757
	19.4121	4.9811
	19.4461	4.9833
	19.4811	4.9806
	19.5151	4.9834
	19.5501	4.98
	19.5841	4.9796
	19.6201	4.9836
	19.6551	4.983
	19.6901	4.9881
	19.7241	4.9787
	19.7591	4.9811
	19.7941	4.9843
	19.8291	4.979
	19.8641	4.9771
	19.8991	4.9758
	19.9341	4.9725
	19.9692	4.9763
	20.0042	4.971
	20.0382	4.9669
	20.0732	4.9716
	20.1082	4.9616
	20.1422	4.9665
	20.1762	4.9761
	20.2112	4.9656
	20.2462	4.9665
	20.2812	4.9707
	20.3162	4.9677
	20.3512	4.9695
	20.3862	4.9675
	20.4212	4.9614
	20.4562	4.9724
	20.4902	4.9708
	20.5252	4.9799
	20.5602	4.9708
	20.5952	4.9768
	20.6292	4.9744
	20.6642	4.976
	20.6982	4.9693
	20.7332	4.9752
	20.7692	4.967
	20.8032	4.9596
	20.8382	4.9545
	20.8732	4.9645
	20.9082	4.9599
	20.9432	4.966
	20.9782	4.9626
	21.0132	4.964
	21.0482	4.9633
	21.0842	4.965
	21.1182	4.9636
	21.1532	4.9602
	21.1882	4.9626
	21.2232	4.9541
	21.2572	4.9615
	21.2922	4.9721
	21.3262	4.9614
	21.3612	4.9595
	21.3962	4.9654
	21.4312	4.9547
	21.4672	4.9531
	21.5012	4.9464
	21.5362	4.9397
	21.5712	4.9354
	21.6062	4.9365
	21.6402	4.9259
	21.6752	4.9192
	21.7093	4.927
	21.7443	4.9281
	21.7803	4.9317
	21.8163	4.9298
	21.8513	4.9307
	21.8863	4.9312
	21.9213	4.934
	21.9553	4.9278
	21.9903	4.9358
	22.0253	4.935
	22.0603	4.9304
	22.0953	4.9348
	22.1303	4.938
	22.1653	4.9393
	22.2003	4.9329
	22.2353	4.939
	22.2703	4.9382
	22.3053	4.9501
	22.3393	4.9448
	22.3743	4.9556
	22.4093	4.9559
	22.4443	4.9615
	22.4793	4.9606
	22.5143	4.9604
	22.5483	4.9591
	22.5833	4.9485
	22.6183	4.956
	22.6533	4.9581
	22.6873	4.9544
	22.7223	4.9535
	22.7573	4.948
	22.7933	4.9453
	22.8293	4.9519
	22.8643	4.9412
	22.9003	4.9541
	22.9343	4.9468
	22.9693	4.9465
	23.0033	4.9466
	23.0383	4.9354
	23.0733	4.9423
	23.1083	4.9463
	23.1443	4.9465
	23.1793	4.9491
	23.2153	4.9566
	23.2493	4.9537
	23.2843	4.9532
	23.3193	4.9547
	23.3543	4.9538
	23.3883	4.9571
	23.4233	4.9632
	23.4584	4.964
	23.4924	4.9689
	23.5274	4.962
	23.5624	4.9711
	23.5974	4.9617
	23.6324	4.9486
	23.6674	4.9453
	23.7014	4.9415
	23.7364	4.9436
	23.7714	4.9443
	23.8074	4.9473
	23.8434	4.9491
	23.8784	4.9481
	23.9144	4.9527
	23.9484	4.9472
	23.9834	4.9483
	24.0184	4.9514
	24.0534	4.9576
	24.0884	4.9512
	24.1234	4.9575
	24.1584	4.9533
	24.1944	4.9514
	24.2294	4.9533
	24.2644	4.9448
	24.2994	4.9534
	24.3344	4.9571
	24.3694	4.9461
	24.4044	4.9483
	24.4394	4.9451
	24.4744	4.9493
	24.5094	4.9523
	24.5454	4.9495
	24.5804	4.944
	24.6154	4.9499
	24.6504	4.9413
	24.6854	4.9367
	24.7204	4.9385
	24.7554	4.9431
	24.7914	4.946
	24.8274	4.9558
	24.8624	4.9496
	24.8974	4.9566
	24.9324	4.9524
	24.9674	4.9496
	25.0024	4.9556
	25.0374	4.9523
	25.0724	4.9498
	25.1084	4.9463
	25.1424	4.955
	25.1774	4.9522
	25.2125	4.949
	25.2475	4.9318
	25.2825	4.9334
	25.3175	4.9368
	25.3525	4.9425
	25.3875	4.9354
	25.4225	4.9349
	25.4575	4.9366
	25.4935	4.9355
	25.5285	4.93
	25.5635	4.9326
	25.5985	4.9324
	25.6335	4.9235
	25.6685	4.9318
	25.7035	4.9345
	25.7395	4.9344
	25.7735	4.9398
	25.8085	4.9297
	25.8435	4.9311
	25.8785	4.932
	25.9135	4.9428
	25.9485	4.9398
	25.9835	4.9355
	26.0185	4.9437
	26.0535	4.9371
	26.0895	4.9426
	26.1245	4.9454
	26.1595	4.9429
	26.1945	4.9372
	26.2295	4.9429
	26.2635	4.9433
	26.2985	4.9459
	26.3325	4.9329
	26.3675	4.9438
	26.4025	4.9426
	26.4375	4.9358
	26.4725	4.9265
	26.5075	4.9364
	26.5425	4.9249
	26.5775	4.9243
	26.6115	4.9218
	26.6465	4.9234
	26.6815	4.92
	26.7165	4.9235
	26.7525	4.927
	26.7885	4.9338
	26.8235	4.9352
	26.8585	4.9358
	26.8935	4.9381
	26.9285	4.9443
	26.9646	4.9396
	26.9986	4.9445
	27.0346	4.9355
	27.0696	4.939
	27.1046	4.9323
	27.1396	4.9418
	27.1746	4.9363
	27.2096	4.9426
	27.2446	4.9467
	27.2786	4.9421
	27.3126	4.9351
	27.3476	4.9369
	27.3826	4.9332
	27.4176	4.9355
	27.4526	4.9389
	27.4876	4.9338
	27.5226	4.9441
	27.5576	4.9367
	27.5916	4.9329
	27.6266	4.931
	27.6616	4.9293
	27.6966	4.9237
	27.7316	4.9217
	27.7676	4.9199
	27.8026	4.9222
	27.8376	4.9314
	27.8726	4.9108
	27.9066	4.9116
	27.9426	4.9173
	27.9776	4.9107
	28.0126	4.92
	28.0476	4.9208
	28.0836	4.9215
	28.1186	4.9249
	28.1536	4.9209
	28.1886	4.9362
	28.2236	4.9335
	28.2576	4.9402
	28.2926	4.9425
	28.3276	4.9471
	28.3626	4.9448
	28.3976	4.9365
	28.4336	4.9268
	28.4676	4.9362
	28.5026	4.9283
	28.5376	4.9304
	28.5716	4.9306
	28.6066	4.9292
	28.6416	4.9184
	28.6766	4.9271
	28.7117	4.9162
	28.7467	4.9161
	28.7817	4.9206
	28.8167	4.9194
	28.8517	4.9281
	28.8857	4.9091
	28.9207	4.9156
	28.9557	4.9129
	28.9907	4.9153
	29.0257	4.9168
	29.0607	4.9336
	29.0957	4.9366
	29.1317	4.9285
	29.1667	4.9413
	29.2017	4.9354
	29.2367	4.9416
	29.2717	4.9354
	29.3057	4.9329
	29.3407	4.9373
	29.3757	4.9271
	29.4107	4.9287
	29.4467	4.9413
	29.4817	4.9412
	29.5157	4.9424
	29.5507	4.937
	29.5857	4.9427
	29.6207	4.9399
	29.6557	4.9473
	29.6907	4.9467
	29.7257	4.9282
	29.7607	4.9198
	29.7957	4.9215
	29.8307	4.9259
	29.8657	4.925
	29.9007	4.9356
	29.9357	4.921
	29.9697	4.9221
	30.0047	4.9191
	30.0397	4.9235
	30.0747	4.9242
	30.1097	4.9249
	30.1457	4.9226
	30.1817	4.9079
	30.2157	4.9062
	30.2507	4.915
	30.2857	4.9197
	30.3207	4.9198
	30.3557	4.918
	30.3907	4.9133
	30.4257	4.9118
	30.4608	4.9066
	30.4958	4.9033
	30.5308	4.9094
	30.5658	4.9125
	30.6008	4.9148
	30.6358	4.9218
	30.6708	4.9204
	30.7058	4.9239
	30.7408	4.9138
	30.7768	4.902
	30.8118	4.9144
	30.8468	4.9098
	30.8818	4.9105
	30.9168	4.9138
	30.9518	4.9104
	30.9868	4.9032
	31.0218	4.9007
	31.0568	4.9043
	31.0918	4.9136
	31.1278	4.9115
	31.1628	4.9127
	31.1978	4.9191
	31.2328	4.9199
	31.2678	4.9183
	31.3028	4.9196
	31.3378	4.921
	31.3728	4.9267
	31.4088	4.9208
	31.4448	4.9333
	31.4798	4.9385
	31.5148	4.9425
	31.5488	4.9429
	31.5838	4.9495
	31.6188	4.9425
	31.6538	4.9484
	31.6888	4.9587
	31.7248	4.9535
	31.7588	4.948
	31.7948	4.9619
	31.8288	4.9611
	31.8638	4.9555
	31.8988	4.9561
	31.9338	4.945
	31.9698	4.9495
	32.0038	4.9454
	32.0388	4.944
	32.0748	4.9389
	32.1088	4.9451
	32.1438	4.9563
	32.1789	4.9509
	32.2139	4.9565
	32.2489	4.9543
	32.2839	4.9555
	32.3189	4.9588
	32.3539	4.9531
	32.3899	4.9468
	32.4239	4.9462
	32.4599	4.9505
	32.4939	4.9568
	32.5289	4.9609
	32.5639	4.9561
	32.5979	4.9556
	32.6329	4.9415
	32.6679	4.9416
	32.7029	4.9366
	32.7389	4.9309
	32.7739	4.932
	32.8089	4.9362
	32.8439	4.9352
	32.8789	4.9477
	32.9139	4.9455
	32.9489	4.9374
	32.9839	4.9396
	33.0189	4.9419
	33.0549	4.9421
	33.0899	4.9337
	33.1249	4.9288
	33.1599	4.931
	33.1949	4.9259
	33.2299	4.926
	33.2649	4.9295
	33.2999	4.9332
	33.3349	4.9292
	33.3709	4.942
	33.4059	4.9412
	33.4409	4.9347
	33.4759	4.9421
	33.5109	4.9497
	33.5459	4.9478
	33.5809	4.9504
	33.6159	4.9509
	33.6509	4.953
	33.6869	4.9482
	33.7219	4.9452
	33.7579	4.9503
	33.7919	4.9574
	33.8269	4.9514
	33.8619	4.9538
	33.8979	4.9454
	33.932	4.9515
	33.967	4.9512
	34.004	4.9442
	34.039	4.952
	34.074	4.9548
	34.108	4.9487
	34.143	4.9518
	34.178	4.9439
	34.213	4.9525
	34.248	4.9574
	34.283	4.9549
	34.319	4.9506
	34.354	4.9407
	34.389	4.9457
	34.424	4.9406
	34.459	4.9416
	34.494	4.9463
	34.529	4.9397
	34.564	4.9367
	34.599	4.931
	34.635	4.9372
	34.67	4.9367
	34.705	4.9269
	34.74	4.9314
	34.775	4.9291
	34.81	4.9263
	34.845	4.9252
	34.88	4.9246
	34.915	4.9286
	34.951	4.9216
	34.986	4.9234
	35.021	4.9342
	35.056	4.9271
	35.091	4.9316
	35.125	4.9162
	35.16	4.9187
	35.195	4.914
	35.23	4.9284
	35.265	4.9195
	35.3	4.9187
	35.335	4.9241
	35.37	4.9311
	35.405	4.9144
	35.439	4.9189
	35.473	4.9303
	35.508	4.9333
	35.543	4.9271
	35.578	4.9224
	35.613	4.9299
	35.648	4.9322
	35.6831	4.9358
	35.7181	4.9459
	35.7521	4.9443
	35.7871	4.9339
	35.8221	4.9291
	35.8571	4.9364
	35.8911	4.9439
	35.9261	4.9388
	35.9611	4.9367
	35.9961	4.9314
	36.0311	4.9397
	36.0661	4.9334
	36.1021	4.9458
	36.1361	4.949
	36.1701	4.9501
	36.2051	4.9449
	36.2401	4.9467
	36.2741	4.9414
	36.3091	4.9392
	36.3441	4.9378
	36.3801	4.9248
	36.4151	4.9278
	36.4511	4.937
	36.4861	4.927
	36.5211	4.9305
	36.5561	4.9288
	36.5901	4.9217
	36.6251	4.9277
	36.6601	4.9282
	36.6961	4.9296
	36.7301	4.9425
	36.7661	4.9379
	36.8011	4.9395
	36.8361	4.9464
	36.8711	4.949
	36.9061	4.9473
	36.9401	4.9444
	36.9751	4.9422
	37.0101	4.9433
	37.0461	4.9478
	37.0811	4.9424
	37.1161	4.9381
	37.1501	4.9342
	37.1851	4.9312
	37.2201	4.9281
	37.2551	4.9268
	37.2901	4.9227
	37.3251	4.9209
	37.3601	4.921
	37.3971	4.916
	37.4322	4.9196
	37.4672	4.9145
	37.5022	4.9196
	37.5362	4.9275
	37.5712	4.9215
	37.6062	4.9113
	37.6412	4.9147
	37.6772	4.9257
	37.7122	4.9276
	37.7472	4.9345
	37.7812	4.9248
	37.8162	4.935
	37.8512	4.9283
	37.8862	4.9343
	37.9212	4.9343
	37.9572	4.9414
	37.9922	4.9434
	38.0272	4.9363
	38.0632	4.9381
	38.0982	4.9474
	38.1322	4.9372
	38.1672	4.9353
	38.2022	4.9329
	38.2372	4.9414
	38.2722	4.9369
	38.3072	4.9354
	38.3432	4.9399
	38.3792	4.9454
	38.4142	4.9319
	38.4492	4.9285
	38.4842	4.9356
	38.5192	4.9305
	38.5542	4.9298
	38.5882	4.93
	38.6232	4.9267
	38.6592	4.9352
	38.6932	4.9345
	38.7282	4.9377
	38.7632	4.9425
	38.7982	4.9401
	38.8332	4.9277
	38.8682	4.9286
	38.9032	4.9353
	38.9382	4.9397
	38.9742	4.933
	39.0092	4.9281
	39.0442	4.9313
	39.0792	4.932
	39.1142	4.9357
	39.1502	4.9314
	39.1853	4.9305
	39.2203	4.9328
	39.2563	4.9321
	39.2923	4.925
	39.3273	4.9275
	39.3613	4.9227
	39.3963	4.9236
	39.4313	4.9232
	39.4663	4.9277
	39.5023	4.9246
	39.5373	4.9383
	39.5723	4.9372
	39.6073	4.9305
	39.6433	4.9362
	39.6773	4.9396
	39.7123	4.9483
	39.7473	4.9496
	39.7823	4.9385
	39.8173	4.94
	39.8513	4.9367
	39.8873	4.9377
	39.9223	4.9324
	39.9583	4.9311
	39.9923	4.9326
	40.0273	4.9273
	40.0623	4.9272
	40.0973	4.9312
	40.1323	4.9344
	40.1673	4.9371
	40.2033	4.9257
	40.2383	4.9306
	40.2733	4.9325
	40.3083	4.9205
	40.3433	4.922
	40.3783	4.9226
	40.4133	4.9299
	40.4483	4.9146
	40.4833	4.9219
	40.5193	4.9172
	40.5543	4.9183
	40.5893	4.9288
	40.6243	4.9254
	40.6593	4.9292
	40.6943	4.9409
	40.7293	4.9389
	40.7643	4.9391
	40.7993	4.9356
	40.8353	4.9403
	40.8703	4.9289
	40.9063	4.9411
	40.9404	4.942
	40.9754	4.9504
	41.0094	4.9388
	41.0444	4.9326
	41.0794	4.9341
	41.1134	4.9322
	41.1484	4.9318
	41.1834	4.9337
	41.2194	4.9431
	41.2544	4.9405
	41.2894	4.9406
	41.3244	4.9398
	41.3594	4.9415
	41.3944	4.9398
	41.4294	4.9313
	41.4644	4.9321
	41.5004	4.936
	41.5354	4.9302
	41.5704	4.9417
	41.6054	4.9253
	41.6404	4.9359
	41.6754	4.936
	41.7104	4.9343
	41.7454	4.932
	41.7804	4.9295
	41.8164	4.9263
	41.8514	4.9377
	41.8874	4.9343
	41.9214	4.9292
	41.9564	4.937
	41.9914	4.9377
	42.0264	4.9367
	42.0614	4.9369
	42.0964	4.9378
	42.1324	4.9346
	42.1674	4.9442
	42.2034	4.9371
	42.2384	4.9349
	42.2734	4.935
	42.3084	4.9456
	42.3434	4.9407
	42.3784	4.9365
	42.4134	4.9281
	42.4494	4.9278
	42.4854	4.9405
	42.5194	4.9367
	42.5544	4.9223
	42.5894	4.9367
	42.6244	4.9319
	42.6594	4.9277
	42.6945	4.9331
	42.7305	4.9347
	42.7655	4.9243
	42.8005	4.9233
	42.8355	4.9144
	42.8705	4.9276
	42.9055	4.9291
	42.9405	4.9225
	42.9755	4.9177
	43.0105	4.9151
	43.0455	4.9123
	43.0815	4.9085
	43.1165	4.9056
	43.1515	4.9129
	43.1865	4.9128
	43.2215	4.913
	43.2565	4.9113
	43.2915	4.9209
	43.3265	4.9167
	43.3615	4.9225
	43.3965	4.9132
	43.4315	4.9194
	43.4665	4.9216
	43.5015	4.9125
	43.5365	4.9236
	43.5715	4.9195
	43.6065	4.9152
	43.6415	4.9114
	43.6765	4.9185
	43.7125	4.9138
	43.7475	4.9117
	43.7825	4.904
	43.8175	4.9123
	43.8525	4.9116
	43.8875	4.9066
	43.9215	4.8991
	43.9565	4.9109
	43.9915	4.903
	44.0265	4.9
	44.0625	4.9038
	44.0985	4.9003
	44.1335	4.901
	44.1675	4.9026
	44.2025	4.904
	44.2375	4.9059
	44.2725	4.906
	44.3075	4.8987
	44.3435	4.9055
	44.3775	4.9064
	44.4115	4.9183
	44.4466	4.9119
	44.4816	4.914
	44.5176	4.9094
	44.5516	4.902
	44.5866	4.9053
	44.6216	4.9035
	44.6566	4.9032
	44.6916	4.8902
	44.7276	4.8986
	44.7626	4.8934
	44.7976	4.8976
	44.8326	4.8937
	44.8676	4.8873
	44.9026	4.8999
	44.9376	4.8952
	44.9736	4.8845
	45.0086	4.8918
	45.0446	4.9
	45.0796	4.8998
	45.1146	4.8928
	45.1496	4.8953
	45.1846	4.8977
	45.2196	4.9056
	45.2546	4.9072
	45.2896	4.9064
	45.3256	4.9017
	45.3606	4.9064
	45.3956	4.9068
	45.4296	4.9109
	45.4646	4.9068
	45.4996	4.9079
	45.5346	4.9165
	45.5696	4.9147
	45.6046	4.9057
	45.6386	4.9186
	45.6736	4.9164
	45.7086	4.917
	45.7426	4.9128
	45.7776	4.912
	45.8126	4.9134
	45.8476	4.9184
	45.8826	4.9138
	45.9176	4.9133
	45.9516	4.9083
	45.9866	4.9153
	46.0226	4.9213
	46.0576	4.9123
	46.0926	4.9099
	46.1276	4.9098
	46.1627	4.9022
	46.1967	4.9134
	46.2317	4.915
	46.2667	4.9093
	46.3017	4.9099
	46.3367	4.9141
	46.3727	4.906
	46.4067	4.9114
	46.4417	4.9086
	46.4767	4.9067
	46.5117	4.9038
	46.5467	4.9091
	46.5817	4.9115
	46.6167	4.9069
	46.6517	4.9107
	46.6867	4.9026
	46.7227	4.9153
	46.7577	4.9203
	46.7927	4.9145
	46.8277	4.9156
	46.8627	4.9062
	46.8977	4.9024
	46.9327	4.896
	46.9677	4.892
	47.0027	4.8948
	47.0387	4.8919
	47.0727	4.9001
	47.1087	4.8953
	47.1427	4.8918
	47.1777	4.8948
	47.2127	4.8935
	47.2477	4.8927
	47.2817	4.893
	47.3167	4.8949
	47.3527	4.8919
	47.3877	4.8925
	47.4237	4.8909
	47.4587	4.8911
	47.4937	4.8934
	47.5287	4.902
	47.5637	4.905
	47.5987	4.8933
	47.6337	4.8985
	47.6697	4.9014
	47.7037	4.9017
	47.7387	4.9007
	47.7737	4.9088
	47.8087	4.8979
	47.8437	4.8972
	47.8787	4.899
	47.9138	4.8922
	47.9488	4.9059
	47.9848	4.9049
	48.0208	4.906
	48.0558	4.9108
	48.0908	4.914
	48.1258	4.9018
	48.1598	4.9067
	48.1948	4.9078
	48.2308	4.9015
	48.2658	4.9
	48.3008	4.9046
	48.3358	4.9011
	48.3718	4.9092
	48.4058	4.904
	48.4408	4.9023
	48.4758	4.8956
	48.5098	4.8943
	48.5448	4.8989
	48.5798	4.8962
	48.6148	4.8933
	48.6518	4.8873
	48.6868	4.8934
	48.7218	4.8957
	48.7578	4.8951
	48.7918	4.8981
	48.8268	4.8992
	48.8618	4.9018
	48.8968	4.9016
	48.9328	4.8927
	48.9678	4.9021
	49.0028	4.8941
	49.0378	4.8871
	49.0728	4.8769
	49.1078	4.8899
	49.1428	4.8983
	49.1778	4.8878
	49.2128	4.8875
	49.2488	4.8791
	49.2848	4.8816
	49.3208	4.8787
	49.3548	4.8826
	49.3898	4.8942
	49.4258	4.8843
	49.4598	4.8925
	49.4948	4.8913
	49.5308	4.8908
	49.5658	4.8983
	49.6018	4.9001
	49.6358	4.8914
	49.6699	4.8868
	49.7049	4.8843
	49.7399	4.882
	49.7749	4.8776
	49.8099	4.877
	49.8449	4.8827
	49.8809	4.8846
	49.9159	4.8755
	49.9509	4.8627
	49.9859	4.8709
	50.0209	4.8672
	50.0559	4.8657
	50.0909	4.8605
	50.1259	4.8567
	50.1619	4.8463
	50.1979	4.8369
	50.2339	4.8285
	50.2689	4.8342
	50.3049	4.834
	50.3399	4.8412
	50.3749	4.8467
	50.4099	4.842
	50.4459	4.8387
	50.4799	4.8354
	50.5159	4.837
	50.5509	4.8306
	50.5859	4.8183
	50.6209	4.8183
	50.6559	4.819
	50.6909	4.8223
	50.7259	4.8231
	50.7619	4.8224
	50.7979	4.8079
	50.8319	4.8165
	50.8669	4.8067
	50.9019	4.8027
	50.9369	4.8014
	50.9719	4.8039
	51.0069	4.8019
	51.0419	4.7876
	51.0779	4.7874
	51.1129	4.7907
	51.1479	4.78
	51.1829	4.7867
	51.2179	4.7864
	51.2529	4.7835
	51.2879	4.7986
	51.3239	4.79
	51.3579	4.7929
	51.3939	4.7955
	51.429	4.7918
	51.464	4.7891
	51.499	4.7896
	51.534	4.7872
	51.569	4.7814
	51.604	4.7832
	51.64	4.7674
	51.674	4.7609
	51.71	4.7551
	51.745	4.7433
	51.78	4.7459
	51.815	4.7344
	51.85	4.7358
	51.885	4.7351
	51.92	4.7298
	51.955	4.7224
	51.99	4.7098
	52.026	4.7136
	52.062	4.7077
	52.096	4.7118
	52.131	4.7016
	52.166	4.6874
	52.201	4.6806
	52.236	4.677
	52.271	4.6765
	52.307	4.6644
	52.342	4.6514
	52.378	4.6578
	52.412	4.6459
	52.447	4.6411
	52.481	4.6488
	52.517	4.6438
	52.551	4.6376
	52.586	4.6341
	52.621	4.6286
	52.655	4.6229
	52.69	4.6055
	52.725	4.6049
	52.759	4.6011
	52.794	4.5974
	52.829	4.5994
	52.864	4.5922
	52.899	4.5856
	52.934	4.5832
	52.969	4.5782
	53.004	4.58
	53.04	4.5691
	53.075	4.5662
	53.11	4.5554
	53.145	4.5473
	53.1801	4.5442
	53.2151	4.5379
	53.2501	4.5323
	53.2851	4.5429
	53.3201	4.5334
	53.3561	4.5223
	53.3911	4.529
	53.4261	4.5265
	53.4611	4.5284
	53.4961	4.5154
	53.5311	4.5021
	53.5671	4.5076
	53.6011	4.502
	53.6361	4.5029
	53.6721	4.4928
	53.7081	4.4948
	53.7421	4.4864
	53.7771	4.491
	53.8121	4.4815
	53.8471	4.4722
	53.8821	4.4652
	53.9171	4.4627
	53.9521	4.4683
	53.9881	4.4683
	54.0221	4.4734
	54.0571	4.4634
	54.0921	4.4551
	54.1271	4.4452
	54.1621	4.4396
	54.1971	4.4253
	54.2321	4.4152
	54.2671	4.4102
	54.3021	4.4138
	54.3371	4.4147
	54.3731	4.4089
	54.4081	4.3933
	54.4441	4.3861
	54.4781	4.3867
	54.5131	4.3814
	54.5481	4.3834
	54.5831	4.3824
	54.6181	4.3929
	54.6531	4.3857
	54.6891	4.3814
	54.7241	4.3749
	54.7591	4.3723
	54.7941	4.3671
	54.8291	4.3615
	54.8641	4.3467
	54.8991	4.3418
	54.9352	4.3361
	54.9702	4.3307
	55.0052	4.3304
	55.0402	4.3252
	55.0752	4.3172
	55.1102	4.3193
	55.1452	4.3063
	55.1802	4.2998
	55.2152	4.2852
	55.2502	4.2769
	55.2862	4.2777
	55.3212	4.2769
	55.3562	4.2747
	55.3912	4.2674
	55.4262	4.2594
	55.4612	4.2545
	55.4952	4.2551
	55.5302	4.2407
	55.5652	4.2453
	55.6012	4.237
	55.6372	4.2368
	55.6712	4.2283
	55.7062	4.2286
	55.7412	4.2308
	55.7762	4.2203
	55.8112	4.2203
	55.8462	4.2131
	55.8822	4.2154
	55.9172	4.2149
	55.9532	4.2025
	55.9872	4.2015
	56.0222	4.1953
	56.0572	4.1963
	56.0932	4.1907
	56.1272	4.1858
	56.1622	4.1784
	56.1972	4.1744
	56.2322	4.1606
	56.2682	4.1629
	56.3032	4.1586
	56.3372	4.1516
	56.3722	4.1534
	56.4072	4.1536
	56.4422	4.1456
	56.4772	4.1396
	56.5122	4.1428
	56.5482	4.1456
	56.5832	4.1413
	56.6182	4.1268
	56.6532	4.1129
	56.6883	4.1164
	56.7233	4.1078
	56.7583	4.1054
	56.7933	4.1046
	56.8283	4.0973
	56.8643	4.091
	56.8993	4.0905
	56.9343	4.0879
	56.9693	4.0847
	57.0043	4.0844
	57.0393	4.0744
	57.0743	4.0669
	57.1093	4.0607
	57.1443	4.0616
	57.1803	4.0523
	57.2143	4.053
	57.2493	4.0502
	57.2843	4.0494
	57.3193	4.0419
	57.3543	4.0412
	57.3893	4.0276
	57.4243	4.0202
	57.4593	4.0252
	57.4953	4.0124
	57.5303	4.0113
	57.5653	3.9987
	57.6003	3.9876
	57.6353	3.9875
	57.6703	3.9874
	57.7053	3.9787
	57.7403	3.9705
	57.7753	3.9758
	57.8103	3.9735
	57.8453	3.9669
	57.8803	3.9644
	57.9153	3.9478
	57.9503	3.9483
	57.9853	3.9421
	58.0203	3.9378
	58.0553	3.9329
	58.0903	3.9299
	58.1253	3.9218
	58.1603	3.9144
	58.1973	3.9149
	58.2323	3.9134
	58.2683	3.9095
	58.3023	3.896
	58.3373	3.8979
	58.3713	3.8884
	58.4064	3.8848
	58.4414	3.8771
	58.4764	3.8725
	58.5114	3.873
	58.5464	3.8743
	58.5814	3.8691
	58.6154	3.8715
	58.6504	3.8723
	58.6844	3.8701
	58.7194	3.8637
	58.7544	3.8638
	58.7884	3.8626
	58.8234	3.8645
	58.8594	3.8543
	58.8934	3.8544
	58.9284	3.8531
	58.9634	3.8455
	58.9984	3.8431
	59.0334	3.8392
	59.0684	3.8329
	59.1024	3.8316
	59.1374	3.827
	59.1724	3.8246
	59.2084	3.8245
	59.2434	3.8176
	59.2784	3.8204
	59.3134	3.814
	59.3484	3.806
	59.3834	3.793
	59.4184	3.7881
	59.4534	3.7888
	59.4884	3.7834
	59.5254	3.7771
	59.5604	3.778
	59.5954	3.7791
	59.6304	3.7703
	59.6654	3.7661
	59.7004	3.7631
	59.7354	3.7636
	59.7704	3.7513
	59.8054	3.7516
	59.8414	3.7521
	59.8764	3.7466
	59.9114	3.7458
	59.9464	3.7449
	59.9814	3.746
	60.0164	3.7347
	60.0514	3.7418
	60.0864	3.729
	60.1224	3.7197
	60.1575	3.7115
	60.1935	3.7102
	60.2275	3.7085
	60.2625	3.7005
	60.2975	3.6972
	60.3325	3.6996
	60.3675	3.695
	60.4025	3.6969
	60.4385	3.6958
	60.4725	3.6913
	60.5085	3.6876
	60.5435	3.6889
	60.5785	3.6837
	60.6125	3.6928
	60.6475	3.695
	60.6815	3.6873
	60.7165	3.697
	60.7515	3.6907
	60.7865	3.6942
	60.8225	3.6888
	60.8565	3.6873
	60.8915	3.685
	60.9265	3.6806
	60.9625	3.6727
	60.9965	3.6747
	61.0315	3.6697
	61.0665	3.6626
	61.1025	3.6625
	61.1375	3.6638
	61.1735	3.6557
	61.2085	3.6523
	61.2435	3.6517
	61.2785	3.6579
	61.3145	3.6498
	61.3485	3.6481
	61.3835	3.6376
	61.4195	3.6386
	61.4545	3.639
	61.4895	3.6323
	61.5245	3.6391
	61.5595	3.6329
	61.5945	3.6335
	61.6295	3.6326
	61.6645	3.6302
	61.6995	3.6226
	61.7355	3.6233
	61.7695	3.6215
	61.8045	3.6212
	61.8395	3.6069
	61.8745	3.609
	61.9096	3.6091
	61.9446	3.6092
	61.9796	3.6019
	62.0146	3.6009
	62.0496	3.589
	62.0856	3.5832
	62.1216	3.5791
	62.1556	3.5728
	62.1906	3.5772
	62.2246	3.5719
	62.2596	3.5648
	62.2946	3.5687
	62.3296	3.5526
	62.3646	3.556
	62.4006	3.5567
	62.4356	3.5576
	62.4706	3.5514
	62.5056	3.5563
	62.5406	3.5469
	62.5756	3.5429
	62.6106	3.5467
	62.6456	3.5487
	62.6806	3.543
	62.7166	3.5437
	62.7516	3.5475
	62.7866	3.5408
	62.8216	3.5442
	62.8566	3.5398
	62.8916	3.5415
	62.9266	3.5425
	62.9606	3.5336
	62.9956	3.5314
	63.0316	3.5274
	63.0666	3.5231
	63.1026	3.5306
	63.1376	3.5289
	63.1726	3.5249
	63.2076	3.5228
	63.2416	3.5209
	63.2766	3.5204
	63.3116	3.5221
	63.3476	3.5159
	63.3826	3.5122
	63.4186	3.5139
	63.4536	3.5117
	63.4886	3.518
	63.5236	3.5157
	63.5586	3.518
	63.5926	3.5137
	63.6276	3.5209
	63.6637	3.526
	63.6987	3.5164
	63.7347	3.5146
	63.7697	3.5111
	63.8037	3.51
	63.8387	3.5033
	63.8737	3.501
	63.9087	3.5022
	63.9437	3.4982
	63.9797	3.4995
	64.0147	3.5023
	64.0507	3.4973
	64.0847	3.4927
	64.1187	3.4835
	64.1537	3.4888
	64.1877	3.4882
	64.2227	3.4815
	64.2567	3.4801
	64.2917	3.4879
	64.3267	3.488
	64.3607	3.4893
	64.3967	3.4803
	64.4327	3.48
	64.4667	3.479
	64.5027	3.4806
	64.5377	3.4747
	64.5727	3.4715
	64.6067	3.4622
	64.6417	3.4625
	64.6777	3.4627
	64.7127	3.4611
	64.7487	3.4597
	64.7827	3.4629
	64.8167	3.4671
	64.8517	3.4671
	64.8867	3.4661
	64.9217	3.471
	64.9567	3.4618
	64.9917	3.4665
	65.0277	3.4602
	65.0627	3.4636
	65.0977	3.4657
	65.1327	3.4671
	65.1667	3.4627
	65.2017	3.4743
	65.2367	3.4716
	65.2717	3.4662
	65.3067	3.4698
	65.3417	3.4656
	65.3777	3.4611
	65.4138	3.4638
	65.4478	3.462
	65.4828	3.4616
	65.5178	3.4581
	65.5528	3.4581
	65.5878	3.4468
	65.6228	3.4533
	65.6588	3.4528
	65.6938	3.4535
	65.7288	3.4434
	65.7638	3.4505
	65.7988	3.4475
	65.8338	3.4419
	65.8688	3.4453
	65.9038	3.4416
	65.9388	3.4358
	65.9748	3.4247
	66.0098	3.4268
	66.0448	3.4276
	66.0798	3.4233
	66.1148	3.4216
	66.1498	3.4212
	66.1848	3.4214
	66.2188	3.424
	66.2538	3.4259
	66.2888	3.4213
	66.3248	3.4282
	66.3608	3.4193
	66.3948	3.4173
	66.4298	3.4135
	66.4638	3.4121
	66.4988	3.4049
	66.5328	3.4097
	66.5678	3.4047
	66.6028	3.4152
	66.6378	3.4035
	66.6728	3.3999
	66.7088	3.3945
	66.7438	3.3949
	66.7778	3.3878
	66.8128	3.3932
	66.8478	3.394
	66.8818	3.3921
	66.9168	3.3922
	66.9518	3.3914
	66.9868	3.3864
	67.0228	3.3828
	67.0578	3.3822
	67.0928	3.3755
	67.1278	3.373
	67.1629	3.3692
	67.1979	3.368
	67.2319	3.362
	67.2659	3.3563
	67.3009	3.3534
	67.3359	3.3528
	67.3719	3.3511
	67.4069	3.3532
	67.4419	3.3499
	67.4769	3.344
	67.5119	3.3386
	67.5459	3.3409
	67.5809	3.3422
	67.6159	3.3468
	67.6509	3.3449
	67.6859	3.3469
	67.7219	3.3446
	67.7569	3.3392
	67.7919	3.3413
	67.8259	3.3402
	67.8609	3.3433
	67.8949	3.3405
	67.9299	3.3374
	67.9639	3.335
	67.9989	3.3393
	68.0339	3.3376
	68.0689	3.3368
	68.1039	3.3331
	68.1389	3.3307
	68.1739	3.3259
	68.2079	3.3218
	68.2429	3.3277
	68.2779	3.3152
	68.3129	3.3127
	68.3479	3.3119
	68.3829	3.3073
	68.4179	3.3076
	68.4539	3.308
	68.4879	3.3076
	68.5229	3.3134
	68.5579	3.318
	68.5919	3.3209
	68.6269	3.3143
	68.6619	3.3138
	68.6969	3.3131
	68.7319	3.3133
	68.7679	3.3199
	68.8029	3.3188
	68.8379	3.3197
	68.8729	3.3161
	68.908	3.3202
	68.942	3.3183
	68.977	3.3127
	69.012	3.3199
	69.047	3.3154
	69.082	3.3112
	69.117	3.3105
	69.152	3.315
	69.187	3.3167
	69.222	3.3103
	69.257	3.3082
	69.292	3.3081
	69.326	3.3085
	69.361	3.3089
	69.395	3.3093
	69.43	3.3118
	69.464	3.3115
	69.5	3.3127
	69.534	3.3113
	69.569	3.314
	69.604	3.3168
	69.639	3.3169
	69.674	3.3145
	69.708	3.3145
	69.743	3.3128
	69.778	3.3149
	69.812	3.3187
	69.847	3.3208
	69.882	3.3248
	69.917	3.3251
	69.953	3.3294
	69.987	3.321
[truncated: 1,425 more rows]
