# Supplementary material for: A new insight into RecA filament regulation by RecX from the analysis of conformation-specific interactions
Source: eLife. 2022 Jun 22;11:e78409. doi: 10.7554/eLife.78409 (PMC9252578; doi:10.7554/eLife.78409)
Supplement: Figure 5—source data 1. [file elife-78409-fig5-data1.xlsx]

## Sheet: Fig 5A
	Time, s	L, µm	Force, pN
	0	3.4868	16.2632
	0.034	3.4822	14.3434
	0.068	3.4874	12.2729
	0.103	3.4915	10.0382
	0.136	3.5033	15.0229
	0.17	3.5055	17.7097
	0.204	3.4979	16.7984
	0.239	3.4887	15.0637
	0.274	3.4916	14.6132
	0.309	3.4996	15.7801
	0.344	3.4994	15.1315
	0.378	3.4984	14.2364
	0.412	3.5015	13.7715
	0.446	3.4976	14.2499
	0.48	3.5003	12.7237
	0.514	3.5056	11.4828
	0.549	3.512	16.6161
	0.582	3.5122	15.6764
	0.617	3.5089	13.9833
	0.651	3.5125	14.7042
	0.685	3.5166	18.3985
	0.7191	3.5089	13.0955
	0.7531	3.5119	12.0546
	0.7881	3.5223	19.1425
	0.8221	3.5162	14.6035
	0.8571	3.5169	13.3881
	0.8921	3.5201	12.956
	0.9261	3.5222	11.1072
	0.9601	3.5365	10.5047
	0.9941	3.5416	11.8682
	1.0281	3.551	13.4394
	1.0621	3.5542	11.0852
	1.0951	3.5604	17.6332
	1.1291	3.5534	15.3511
	1.1621	3.5474	11.2556
	1.1961	3.5517	21.0441
	1.2301	3.54	15.2848
	1.2651	3.5387	17.0215
	1.2991	3.5354	18.397
	1.3321	3.5331	14.2971
	1.3661	3.5319	14.6809
	1.4001	3.5389	14.5893
	1.4351	3.541	13.434
	1.4691	3.5461	13.7285
	1.5041	3.5475	12.9763
	1.5391	3.5531	15.1987
	1.5721	3.5493	16.0884
	1.6071	3.5423	17.2393
	1.6411	3.5409	16.584
	1.6761	3.5317	17.267
	1.7091	3.5314	17.7914
	1.7441	3.5198	15.8616
	1.7781	3.5225	19.2426
	1.8131	3.5138	11.5549
	1.8471	3.5189	12.3182
	1.8801	3.5251	10.8724
	1.9151	3.5325	15.6895
	1.9491	3.5346	14.1219
	1.9841	3.5373	14.2805
	2.0181	3.5343	12.8238
	2.0521	3.5399	15.2615
	2.0871	3.5393	17.0995
	2.1201	3.535	14.1214
	2.1551	3.5328	16.2671
	2.1891	3.5347	14.2291
	2.2231	3.5339	16.8744
	2.2581	3.5286	15.3752
	2.2911	3.5296	17.4305
	2.3251	3.5212	17.5966
	2.3601	3.5159	15.8231
	2.3941	3.5176	16.5786
	2.4271	3.5111	16.9108
	2.4621	3.5033	16.8508
	2.4962	3.4994	11.44
	2.5292	3.512	14.7746
	2.5642	3.5075	11.9548
	2.5982	3.5197	13.5644
	2.6312	3.5226	13.9844
	2.6652	3.5283	13.0139
	2.7002	3.5316	11.5599
	2.7352	3.5426	15.0757
	2.7692	3.5412	16.3128
	2.8032	3.5403	15.7896
	2.8382	3.5372	15.8964
	2.8722	3.5325	17.9255
	2.9062	3.5226	17.906
	2.9402	3.5194	14.6862
	2.9742	3.5211	16.8059
	3.0082	3.5141	11.5918
	3.0422	3.5213	15.2295
	3.0762	3.5202	13.8113
	3.1112	3.5191	15.7815
	3.1442	3.5254	13.5872
	3.1792	3.5304	10.8143
	3.2122	3.5319	14.946
	3.2462	3.5346	16.2372
	3.2802	3.5319	15.7725
	3.3142	3.5271	15.2035
	3.3492	3.5314	16.5376
	3.3842	3.5261	14.0986
	3.4172	3.5317	14.5335
	3.4522	3.533	16.2227
	3.4862	3.5311	13.6318
	3.5192	3.5322	14.4948
	3.5532	3.5336	18.3508
	3.5872	3.5306	12.2996
	3.6212	3.5345	12.3821
	3.6552	3.5408	13.9171
	3.6892	3.5415	15.1355
	3.7232	3.5406	17.3294
	3.7572	3.5367	19.6025
	3.7922	3.5253	17.2883
	3.8262	3.5229	13.9917
	3.8612	3.5237	14.2892
	3.8962	3.5269	13.0268
	3.9312	3.5261	18.0159
	3.9662	3.5206	15.3938
	4.0002	3.5202	13.6049
	4.0352	3.5236	13.1307
	4.0702	3.5261	17.2294
	4.1042	3.5198	16.3576
	4.1392	3.5184	18.7358
	4.1732	3.5113	16.2076
	4.2072	3.5053	14.001
	4.2413	3.5077	14.5111
	4.2753	3.5098	17.5355
	4.3103	3.5065	12.4752
	4.3433	3.5049	16.9676
	4.3773	3.5069	15.9141
	4.4123	3.4995	13.564
	4.4463	3.5038	14.1835
	4.4813	3.5079	11.8362
	4.5163	3.5138	15.3097
	4.5503	3.512	13.6662
	4.5843	3.515	15.0821
	4.6183	3.5131	13.9338
	4.6523	3.5176	12.446
	4.6863	3.5222	14.6374
	4.7203	3.528	12.445
	4.7543	3.5283	13.7058
	4.7893	3.5321	13.4514
	4.8233	3.5329	17.0643
	4.8573	3.5311	15.5531
	4.8913	3.5307	13.6555
	4.9253	3.529	14.4549
	4.9583	3.5354	11.2372
	4.9923	3.5426	12.1114
	5.0253	3.5453	17.5487
	5.0593	3.5428	16.69
	5.0943	3.5424	15.9015
	5.1283	3.5395	16.8361
	5.1633	3.5376	12.2691
	5.1983	3.5415	13.0063
	5.2333	3.546	15.1092
	5.2683	3.5393	16.4149
	5.3013	3.5395	16.261
	5.3353	3.5352	13.0087
	5.3703	3.5356	16.1278
	5.4033	3.5365	13.5495
	5.4373	3.5406	14.3353
	5.4713	3.5395	14.0699
	5.5053	3.5405	12.7698
	5.5403	3.5472	17.6378
	5.5733	3.5408	16.4243
	5.6083	3.5407	12.3439
	5.6413	3.5476	13.0996
	5.6763	3.546	15.1396
	5.7113	3.5433	15.7357
	5.7453	3.5451	16.8176
	5.7793	3.542	18.6458
	5.8133	3.5348	18.5873
	5.8483	3.531	14.9289
	5.8833	3.526	15.2078
	5.9163	3.5235	16.6416
	5.9513	3.5258	15.1379
	5.9844	3.5237	14.4183
	6.0184	3.5282	13.1785
	6.0524	3.5275	9.9677
	6.0874	3.5415	14.44
	6.1204	3.5469	11.8065
	6.1544	3.5484	15.9702
	6.1884	3.5462	16.5756
	6.2224	3.5455	14.7705
	6.2564	3.5436	13.887
	6.2914	3.544	19.0281
	6.3254	3.536	15.1171
	6.3594	3.537	12.5891
	6.3934	3.5423	15.0378
	6.4284	3.5415	11.6841
	6.4624	3.5479	14.4096
	6.4974	3.5492	13.6797
	6.5314	3.55	13.5508
	6.5654	3.5531	12.1196
	6.5994	3.5584	17.4585
	6.6344	3.5516	16.4759
	6.6674	3.5466	12.5063
	6.7024	3.5528	18.0239
	6.7354	3.5482	19.8408
	6.7694	3.5421	19.831
	6.8044	3.533	13.4359
	6.8374	3.533	15.5168
	6.8724	3.5354	15.8537
	6.9074	3.5333	14.8493
	6.9424	3.5331	16.277
	6.9764	3.5349	16.2792
	7.0104	3.528	15.9049
	7.0454	3.5287	16.8057
	7.0794	3.5222	14.6597
	7.1134	3.5247	17.1623
	7.1474	3.5173	14.5983
	7.1824	3.5192	16.5514
	7.2164	3.5169	13.756
	7.2514	3.5197	15.6361
	7.2854	3.5181	12.929
	7.3194	3.5207	14.871
	7.3524	3.5251	12.2255
	7.3864	3.53	13.1369
	7.4214	3.5285	10.6888
	7.4554	3.539	14.1434
	7.4904	3.539	15.6536
	7.5254	3.5399	13.6055
	7.5594	3.5415	13.7874
	7.5934	3.5416	17.3264
	7.6274	3.5396	14.6006
	7.6614	3.54	15.8737
	7.6954	3.54	17.2459
	7.7315	3.5368	15.4269
	7.7645	3.5364	14.9657
	7.7985	3.5356	13.8859
	7.8325	3.5359	13.2439
	7.8665	3.5414	15.1798
	7.9015	3.5401	14.7859
	7.9365	3.5382	19.8117
	7.9705	3.5337	12.822
	8.0055	3.5351	12.5132
	8.0405	3.542	16.3604
	8.0745	3.542	14.0366
	8.1085	3.5406	18.071
	8.1425	3.5334	13.1787
	8.1775	3.5384	15.0007
	8.2105	3.5372	10.5733
	8.2445	3.5435	15.9789
	8.2785	3.5433	16.6778
	8.3125	3.5435	17.7814
	8.3465	3.5351	15.5644
	8.3815	3.5322	15.1507
	8.4165	3.5327	15.6508
	8.4495	3.5329	13.8966
	8.4835	3.5352	14.3994
	8.5185	3.5365	17.4711
	8.5525	3.5358	15.5952
	8.5865	3.5332	12.8346
	8.6215	3.5358	14.4051
	8.6545	3.5361	16.3515
	8.6895	3.5325	17.1461
	8.7235	3.5287	13.4576
	8.7585	3.5356	15.728
	8.7915	3.5343	13.1969
	8.8625	3.5355	16.4354
	8.8975	3.5306	15.2761
	8.9315	3.5324	16.2733
	8.9655	3.5283	15.6943
	8.9995	3.5292	14.4522
	9.0345	3.5288	13.7642
	9.0695	3.5309	13.1268
	9.1035	3.5382	16.4616
	9.1365	3.5316	14.8197
	9.1715	3.5322	14.2132
	9.2055	3.5359	15.8423
	9.2395	3.5342	17.8483
	9.2735	3.5256	14.4732
	9.3075	3.5322	12.8387
	9.3415	3.5317	16.3032
	9.3765	3.5318	16.1636
	9.4105	3.5255	14.1201
	9.4435	3.5312	15.2682
	9.4776	3.5286	14.5549
	9.5116	3.5328	20.262
	9.5456	3.5173	15.6554
	9.5806	3.5176	13.9703
	9.6146	3.5213	16.1024
	9.6496	3.5177	12.9491
	9.6836	3.5198	10.459
	9.7176	3.5273	14.5387
	9.7516	3.5286	14.9485
	9.7856	3.5305	15.1376
	9.8186	3.53	12.3417
	9.8536	3.532	12.5438
	9.8876	3.5439	18.7956
	9.9216	3.534	16.6335
	9.9546	3.5336	13.0881
	9.9886	3.5366	15.0122
	10.0236	3.5368	15.0184
	10.0566	3.5333	13.4304
	10.0906	3.5396	14.043
	10.1246	3.5413	16.0831
	10.1586	3.5357	14.8267
	10.1926	3.5349	13.7921
	10.2266	3.5443	9.7912
	10.2606	3.5488	17.7937
	10.2946	3.5446	12.8413
	10.3286	3.5452	17.378
	10.3956	3.5416	15.8295
	10.4306	3.5398	16.43
	10.4656	3.5416	13.7224
	10.4996	3.5432	17.4948
	10.5336	3.5382	18.4348
	10.5686	3.5317	13.4645
	10.6026	3.5341	16.9311
	10.6376	3.5314	15.5778
	10.6706	3.5255	16.1581
	10.7046	3.5267	14.7804
	10.7386	3.5238	13.5467
	10.7726	3.5294	15.026
	10.8076	3.5292	14.5889
	10.8416	3.528	13.6296
	10.8766	3.5383	10.6591
	10.9106	3.5417	13.2818
	10.9456	3.5466	13.1178
	10.9796	3.552	11.8672
	11.0146	3.5545	14.1872
	11.0486	3.5564	18.3311
	11.0836	3.5489	15.5339
	11.1176	3.5552	15.2591
	11.1506	3.5504	11.9528
	11.1856	3.5551	15.9451
	11.2197	3.553	15.9208
	11.2537	3.5534	15.4764
	11.2937	3.5497	14.2085
	11.3377	3.5542	17.0602
	11.3717	3.55	9.9887
	11.4057	3.5535	18.2551
	11.4397	3.5545	16.8411
	11.4737	3.549	15.5033
	11.5077	3.5524	16.069
	11.5407	3.5518	12.4637
	11.5747	3.5501	14.3929
	11.6087	3.5538	16.9956
	11.6427	3.5488	16.2617
	11.6757	3.5462	14.638
	11.7107	3.5479	12.2885
	11.7457	3.5541	14.5258
	11.7807	3.5551	15.2856
	11.8137	3.553	15.2551
	11.8487	3.5559	18.8353
	11.8827	3.5468	16.1821
	11.9167	3.5451	17.1086
	11.9497	3.5413	17.6755
	11.9837	3.5351	15.5921
	12.0187	3.5349	14.9454
	12.0527	3.5363	14.086
	12.0857	3.5394	13.9348
	12.1207	3.5383	14.7409
	12.1547	3.5378	10.2354
	12.1887	3.5498	10.9325
	12.2227	3.5537	13.2758
	12.2567	3.5593	15.5948
	12.2907	3.5577	16.2653
	12.3247	3.5542	14.7061
	12.3577	3.5529	16.737
	12.3917	3.5537	16.5595
	12.4257	3.5452	15.5502
	12.4607	3.5474	17.0681
	12.4947	3.5487	14.3376
	12.5287	3.5477	16.7162
	12.5637	3.5435	18.2822
	12.5977	3.5392	17.9559
	12.6307	3.5294	17.7718
	12.6647	3.5239	18.347
	12.6987	3.517	16.9347
	12.7327	3.5187	12.8171
	12.7677	3.5152	10.4779
	12.8007	3.5256	13.8182
	12.8347	3.527	16.259
	12.8697	3.5255	14.8541
	12.9037	3.5313	16.5063
	12.9377	3.5255	11.4047
	12.9718	3.5336	11.5506
	13.0068	3.5388	14.7622
	13.0418	3.541	17.3969
	13.0768	3.5357	14.4727
	13.1098	3.5407	13.0033
	13.1448	3.5373	16.1551
	13.1798	3.5402	14.4026
	13.2138	3.537	11.2165
	13.2488	3.5485	11.6444
	13.2828	3.5526	14.6565
	13.3158	3.5509	12.4149
	13.3508	3.5581	15.1576
	13.3858	3.5587	13.2777
	13.4208	3.5626	14.5715
	13.4538	3.5617	16.3227
	13.4878	3.5605	16.2623
	13.5218	3.5595	13.4367
	13.5568	3.5574	13.9509
	13.5918	3.5605	16.8525
	13.6268	3.5605	11.5914
	13.6608	3.5673	15.3416
	13.6948	3.5637	12.8708
	13.7288	3.566	14.9555
	13.7628	3.5696	16.2001
	13.7958	3.565	16.4174
	13.8298	3.5638	15.8219
	13.8638	3.5611	15.8008
	13.8978	3.559	15.1553
	13.9318	3.559	16.124
	13.9658	3.5588	12.8004
	14.0008	3.5559	14.4051
	14.0348	3.56	18.0192
	14.0698	3.5541	13.748
	14.1048	3.5613	16.7339
	14.1388	3.5504	14.5477
	14.1748	3.5533	13.6551
	14.2078	3.5542	14.814
	14.2428	3.5577	16.9744
	14.2768	3.553	15.4472
	14.3108	3.5534	17.0236
	14.3448	3.545	15.8776
	14.3798	3.5476	15.9261
	14.4128	3.5461	11.9839
	14.4478	3.5516	15.3554
	14.4818	3.5497	17.455
	14.5168	3.5444	15.0721
	14.5498	3.545	14.8688
	14.5848	3.5439	11.8254
	14.6188	3.5499	17.1055
	14.6538	3.5476	16.8674
	14.6888	3.5437	18.1975
	14.7239	3.5408	11.1487
	14.7579	3.5456	13.7056
	14.7919	3.5451	13.797
	14.8269	3.5493	13.6677
	14.8609	3.5527	15.307
	14.8959	3.5539	13.3351
	14.9299	3.5554	13.8564
	14.9639	3.5601	17.8257
	14.9979	3.5523	18.6265
	15.0329	3.5477	16.9479
	15.0659	3.5442	16.3602
	15.1009	3.5417	11.8335
	15.1339	3.549	12.7922
	15.1689	3.5506	17.6771
	15.2029	3.5441	14.9881
	15.2379	3.5488	13.5739
	15.2719	3.5477	12.8348
	15.3069	3.5495	14.0306
	15.3409	3.5517	12.5916
	15.3749	3.5566	19.2987
	15.4089	3.5477	16.0031
	15.4429	3.5483	15.2665
	15.4769	3.5433	16.2259
	15.5109	3.5423	16.839
	15.5449	3.5356	16.9456
	15.5789	3.5329	15.3898
	15.6139	3.5314	15.5781
	15.6479	3.5324	15.6367
	15.6819	3.532	12.0659
	15.7159	3.5357	16.1445
	15.7499	3.534	12.4272
	15.7849	3.5372	12.4389
	15.8199	3.544	14.7651
	15.8549	3.5417	14.4097
	15.8899	3.5454	13.0761
	15.9239	3.5477	18.0852
	15.9589	3.5447	15.5272
	15.9929	3.5396	13.9047
	16.0279	3.541	17.0686
	16.0629	3.5437	18.6881
	16.0969	3.5345	12.4943
	16.1309	3.5375	14.5534
	16.1659	3.5388	16.5939
	16.1999	3.5385	17.4606
	16.2339	3.5376	14.8148
	16.2679	3.5334	13.1133
	16.3029	3.539	14.7638
	16.3369	3.5386	14.865
	16.3709	3.5417	16.6489
	16.4049	3.5344	12.7127
	16.4389	3.5397	17.7161
	16.472	3.538	18.1071
	16.506	3.5224	19.8841
	16.54	3.5116	15.0333
	16.574	3.5123	16.7669
	16.608	3.5133	13.3113
	16.642	3.5176	10.6589
	16.675	3.523	8.3835
	16.709	3.5306	11.3061
	16.743	3.5427	14.4389
	16.776	3.5432	14.0783
	16.81	3.544	15.6261
	16.844	3.5464	13.7383
	16.878	3.5465	17.3885
	16.912	3.5434	13.8568
	16.947	3.5463	12.9423
	16.98	3.5475	16.7754
	17.014	3.5444	13.3085
	17.049	3.5479	18.1896
	17.083	3.5418	16.1714
	17.118	3.5412	12.2031
	17.152	3.5473	13.6591
	17.186	3.5507	14.4653
	17.22	3.5482	17.8138
	17.253	3.5443	16.8851
	17.287	3.5444	14.4336
	17.321	3.5495	16.5075
	17.355	3.5419	12.5615
	17.389	3.5486	15.8079
	17.422	3.551	15.3921
	17.457	3.5462	15.502
	17.49	3.5451	13.7858
	17.524	3.5505	15.3324
	17.558	3.5499	14.6174
	17.593	3.5485	16.9128
	17.626	3.5453	9.3355
	17.66	3.5544	14.51
	17.694	3.5523	17.745
	17.728	3.5446	15.4431
	17.763	3.5449	14.8938
	17.798	3.5441	17.019
	17.833	3.5387	16.072
	17.867	3.5409	11.0918
	17.901	3.5437	15.3755
	17.935	3.5441	15.9729
	17.97	3.5483	18.4913
	18.004	3.5402	14.7172
	18.038	3.5392	12.9473
	18.072	3.5444	13.9281
	18.106	3.5456	14.27
	18.141	3.5477	12.3598
	18.176	3.5501	14.6905
	18.2091	3.5494	18.2032
	18.2431	3.5443	19.5163
	18.2781	3.5385	14.0484
	18.3121	3.5428	13.925
	18.3471	3.5458	14.8209
	18.3811	3.5505	14.6418
	18.4161	3.5502	16.1578
	18.4501	3.547	12.5895
	18.4841	3.5517	14.8774
	18.5171	3.5472	16.6448
	18.5511	3.545	13.7854
	18.5851	3.5479	15.1394
	18.6191	3.549	12.0309
	18.6531	3.5515	11.2566
	18.6871	3.5533	14.3245
	18.7211	3.5565	14.4829
	18.7551	3.5595	16.8832
	18.7901	3.5558	19.6556
	18.8231	3.548	17.8873
	18.8571	3.5401	16.5726
	18.8911	3.5438	13.3793
	18.9261	3.5439	16.6461
	18.9611	3.5405	15.1663
	18.9951	3.5427	10.537
	19.0291	3.5469	15.5947
	19.0641	3.5464	14.4434
	19.0991	3.5474	14.5968
	19.1331	3.5511	13.993
	19.1671	3.5488	15.2142
	19.2001	3.5514	19.1519
	19.2341	3.5455	16.9191
	19.2681	3.5384	15.928
	19.3021	3.535	16.1339
	19.3371	3.534	13.7273
	19.3711	3.5343	14.4919
	19.4041	3.5383	13.1965
	19.4381	3.5419	14.5698
	19.4731	3.5399	17.431
	19.5071	3.535	12.9037
	19.5421	3.5316	15.7808
	19.5761	3.5379	13.9038
	19.6091	3.5367	15.7566
	19.6441	3.5371	13.3481
	19.6791	3.54	15.3099
	19.7131	3.543	16.0701
	19.7471	3.5378	15.0825
	19.7811	3.5385	15.5996
	19.8151	3.5351	14.8396
	19.8491	3.5326	19.4719
	19.8841	3.5295	13.6206
	19.9171	3.5297	15.1953
	19.9512	3.5275	14.2229
	19.9862	3.5302	15.3406
	20.0202	3.5334	14.5467
	20.0532	3.5269	13.891
	20.0872	3.5371	14.3336
	20.1222	3.5354	13.058
	20.1562	3.5404	14.1682
	20.1912	3.5416	17.0895
	20.2262	3.5385	13.6807
	20.2612	3.5401	14.9302
	20.2952	3.5413	15.4203
	20.3292	3.5419	14.0361
	20.3642	3.546	14.1688
	20.3972	3.5471	13.1235
	20.4322	3.5485	16.1808
	20.4662	3.5448	14.149
	20.4992	3.5477	18.0993
	20.5332	3.5461	13.1799
	20.5672	3.5482	13.7256
	20.6012	3.5509	15.3973
	20.6352	3.5484	15.596
	20.6692	3.549	14.4556
	20.7032	3.5485	17.455
	20.7372	3.5414	16.1915
	20.7712	3.5423	14.2288
	20.8062	3.5407	15.3125
	20.8412	3.5435	15.8834
	20.8762	3.5406	16.1334
	20.9112	3.537	16.8987
	20.9442	3.5354	14.6403
	20.9782	3.5332	16.9587
	21.0132	3.5287	16.7775
	21.0472	3.5276	14.8702
	21.0822	3.5249	14.5866
	21.1162	3.5282	14.5613
	21.1512	3.5277	14.7844
	21.1862	3.5273	15.9868
	21.2212	3.5264	14.6762
	21.2552	3.5258	16.4313
	21.2902	3.5222	16.6167
	21.3252	3.5195	16.4087
	21.3602	3.5139	14.476
	21.3942	3.5163	15.6726
	21.4282	3.5141	14.547
	21.4622	3.5164	14.5178
	21.4962	3.5163	13.3198
	21.5302	3.5212	11.8212
	21.5642	3.5278	12.988
	21.5982	3.5286	17.1701
	21.6332	3.5262	18.5085
	21.6662	3.5184	11.3957
	21.7003	3.5246	14.5424
	21.7343	3.5304	16.6144
	21.7683	3.5209	13.0206
	21.8023	3.5302	16.8846
	21.8373	3.5256	16.6834
	21.8723	3.5265	17.4302
	21.9073	3.5176	16.01
	21.9423	3.5161	16.5621
	21.9753	3.5148	15.8189
	22.0103	3.5133	13.3219
	22.0433	3.5147	16.1433
	22.0773	3.5174	14.6232
	22.1113	3.5175	12.0561
	22.1453	3.5225	16.8577
	22.1793	3.5248	16.7274
	22.2133	3.5154	15.7879
	22.2473	3.5125	13.6218
	22.2823	3.5165	13.4702
	22.3153	3.5176	14.1673
	22.3493	3.5274	11.1846
	22.3833	3.5341	12.7803
	22.4173	3.5331	12.1462
	22.4523	3.541	13.1259
	22.4873	3.5436	14.1476
	22.5213	3.5391	13.9496
	22.5563	3.55	13.0243
	22.5893	3.553	16.032
	22.6233	3.5462	15.1662
	22.6573	3.5441	16.7527
	22.6923	3.5406	15.1389
	22.7263	3.5353	16.3763
	22.7593	3.5374	14.8156
	22.7943	3.5404	13.9323
	22.8273	3.5444	17.6354
	22.8613	3.5322	15.9285
	22.8963	3.533	15.2245
	22.9303	3.5347	14.1887
	22.9643	3.5374	16.0717
	22.9983	3.5305	16.0877
	23.0323	3.532	12.6301
	23.0663	3.5307	17.4002
	23.1013	3.5325	21.6292
	23.1353	3.5217	15.3366
	23.1713	3.5157	15.5892
	23.2063	3.5166	17.4345
	23.2403	3.5069	13.7665
	23.2733	3.512	11.3436
	23.3073	3.5227	11.9297
	23.3413	3.5276	8.7942
	23.3753	3.5347	14.8189
	23.4093	3.5409	14.4463
	23.4444	3.5396	14.8275
	23.4784	3.5409	12.499
	23.5114	3.5441	21.7074
	23.5464	3.5347	15.8914
	23.5794	3.5347	15.6974
	23.6134	3.5294	11.3378
	23.6474	3.5397	15.055
	23.6824	3.5369	12.3041
	23.7164	3.5419	17.3322
	23.7514	3.5424	16.3075
	23.7844	3.5414	16.084
	23.8194	3.5357	14.5097
	23.8544	3.5393	13.0516
	23.8884	3.5392	16.4373
	23.9214	3.5368	15.3601
	23.9554	3.5354	16.5698
	23.9894	3.5356	10.8374
	24.0244	3.543	12.8091
	24.0584	3.5467	11.6908
	24.0924	3.553	13.6263
	24.1264	3.5558	12.7294
	24.1604	3.5605	17.5901
	24.1944	3.5549	17.2263
	24.2284	3.552	12.3728
	24.2634	3.5536	19.0257
	24.2974	3.5463	14.5741
	24.3314	3.5466	14.6593
	24.3664	3.5455	16.0096
	24.3994	3.5424	16.7423
	24.4344	3.5397	14.5412
	24.4684	3.5448	15.2542
	24.5034	3.541	15.1776
	24.5364	3.5441	16.5712
	24.5704	3.5369	14.9098
	24.6044	3.5386	14.5705
	24.6394	3.5404	12.4367
	24.6724	3.5444	13.1109
	24.7064	3.5468	17.0334
	24.7414	3.5443	15.4062
	24.7744	3.5459	15.8692
	24.8084	3.5394	15.5887
	24.8424	3.5395	14.1973
	24.8764	3.5398	15.1143
	24.9104	3.5403	15.4322
	24.9444	3.5392	14.6043
	24.9794	3.5398	16.0471
	25.0134	3.5383	14.5163
	25.0484	3.5391	18.1612
	25.0824	3.533	13.958
	25.1164	3.5367	11.0037
	25.1504	3.5416	13.9944
	25.1854	3.5446	18.7657
	25.2205	3.5346	18.0548
	25.2555	3.531	13.4878
	25.2905	3.5311	17.7812
	25.3245	3.5269	17.9812
	25.3595	3.5216	14.326
	25.3935	3.5189	12.2793
	25.4285	3.526	16.3969
	25.4645	3.527	13.5298
	25.4995	3.5296	14.6179
	25.5335	3.5299	16.9105
	25.5685	3.5269	12.5603
	25.6015	3.5303	14.9356
	25.6355	3.5315	14.8493
	25.6695	3.5327	10.715
	25.7035	3.5367	15.2966
	25.7375	3.5342	18.5863
	25.7715	3.5293	18.8189
	25.8055	3.5231	17.4993
	25.8395	3.5177	16.647
	25.8735	3.5139	10.9214
	25.9085	3.5225	12.109
	25.9415	3.533	14.6455
	25.9765	3.5309	12.0829
	26.0105	3.5368	17.7996
	26.0455	3.5326	17.9706
	26.0805	3.5264	12.909
	26.1145	3.5307	14.9082
	26.1485	3.5313	13.2731
	26.1825	3.5337	13.813
	26.2165	3.5377	15.7791
	26.2505	3.5379	12.208
	26.2845	3.5391	13.6658
	26.3195	3.5471	15.4295
	26.3525	3.5448	14.4469
	26.3875	3.5461	17.0449
	26.4205	3.5399	15.7031
	26.4545	3.5386	15.634
	26.4885	3.5406	16.0317
	26.5215	3.5348	15.8272
	26.5555	3.5356	11.744
	26.5895	3.5382	16.2908
	26.6235	3.5406	15.041
	26.6585	3.5387	15.6708
	26.6925	3.5437	15.485
	26.7265	3.5368	16.2338
	26.7615	3.5343	15.4713
	26.7955	3.5329	15.6964
	26.8295	3.5318	15.7991
	26.8635	3.5296	13.1909
	26.8975	3.5309	13.6931
	26.9315	3.5354	13.7086
	26.9656	3.5378	15.7226
	26.9996	3.5338	16.8496
	27.0336	3.5287	17.4519
	27.0686	3.5274	14.4543
	27.1016	3.5281	12.4976
	27.1366	3.5342	16.4084
	27.1706	3.532	14.4433
	27.2046	3.5347	15.2807
	27.2396	3.5333	12.0525
	27.2736	3.5376	12.0345
	27.3076	3.5451	16.7839
	27.3416	3.5404	16.5598
	27.3756	3.5362	17.4051
	27.4106	3.5318	17.1182
	27.4456	3.5283	17.0411
	27.4786	3.5237	13.8791
	27.5126	3.5243	11.5145
	27.5466	3.5318	14.6636
	27.5806	3.5326	15.6685
	27.6146	3.5303	15.1761
	27.6486	3.5341	12.1702
	27.6826	3.5379	14.4513
	27.7166	3.5392	14.7727
	27.7516	3.5387	13.292
	27.7856	3.5444	15.9277
	27.8186	3.5407	14.4472
	27.8526	3.5478	15.2414
	27.8866	3.5414	16.5572
	27.9206	3.5358	15.111
	27.9556	3.5392	16.6879
	27.9906	3.5374	12.6001
	28.0246	3.5443	14.2024
	28.0596	3.544	14.5231
	28.0946	3.5462	11.0943
	28.1296	3.5468	16.5907
	28.1646	3.5773	17.9619
	28.1986	3.5939	23.8697
	28.2326	3.6019	24.3441
	28.2676	3.6101	22.2182
	28.3026	3.6198	25.9377
	28.3376	3.6182	26.4737
	28.3726	3.629	25.768
	28.4066	3.6346	28.4044
	28.4416	3.6339	28.8676
	28.4756	3.6335	31.8542
	28.5096	3.6349	31.8208
	28.5436	3.6342	27.0669
	28.5786	3.6329	30.701
	28.6116	3.6316	31.3478
	28.6456	3.6331	30.5694
	28.6796	3.6308	28.9819
	28.7137	3.6331	28.638
	28.7477	3.6348	27.9761
	28.7817	3.6335	27.7097
	28.8167	3.6363	31.9884
	28.8497	3.6353	31.2297
	28.8837	3.634	28.779
	28.9177	3.639	30.6142
	28.9527	3.6346	32.3894
	28.9877	3.6339	28.5873
	29.0217	3.6352	33.7415
	29.0557	3.6333	28.5153
	29.0897	3.6308	31.3095
	29.1237	3.6298	29.3652
	29.1577	3.6343	29.1856
	29.1917	3.6303	29.0282
	29.2257	3.6337	33.2332
	29.2597	3.629	27.7679
	29.2937	3.6335	30.4817
	29.3287	3.6342	30.7407
	29.3627	3.6318	30.6403
	29.3967	3.6277	28.1678
	29.4307	3.633	31.3637
	29.4647	3.633	28.9317
	29.4987	3.6357	30.3304
	29.5317	3.6332	27.0804
	29.5657	3.6351	28.7185
	29.6007	3.6379	29.105
	29.6357	3.6368	31.1328
	29.6707	3.6403	34.1928
	29.7067	3.6333	30.3683
	29.7417	3.63	31.5311
	29.7757	3.6329	30.1621
	29.8097	3.6287	29.2007
	29.8427	3.631	28.8595
	29.8767	3.6327	30.3466
	29.9107	3.6325	27.2468
	29.9447	3.6323	29.0651
	29.9787	3.6318	30.6985
	30.0127	3.6322	32.9818
	30.0477	3.6323	31.588
	30.0817	3.6288	31.1977
	30.1167	3.6297	33.4491
	30.1507	3.6241	32.0348
	30.1857	3.6219	30.3064
	30.2197	3.6229	29.7999
	30.2547	3.623	29.6024
	30.2897	3.624	27.8153
	30.3227	3.6241	29.7672
	30.3577	3.6234	28.7526
	30.3917	3.6256	30.9911
	30.4257	3.6294	26.6484
	30.4598	3.6315	27.7696
	30.4938	3.634	28.1911
	30.5278	3.6323	27.5948
	30.5618	3.6381	27.6884
	30.5958	3.6414	33.0242
	30.6298	3.6365	31.2737
	30.6638	3.6385	30.4122
	30.6988	3.6317	28.3231
	30.7338	3.6403	29.2998
	30.7678	3.6384	28.4145
	30.8028	3.6397	31.3885
	30.8368	3.6407	30.2238
	30.8718	3.6393	30.1416
	30.9058	3.6369	31.0096
	30.9398	3.6399	25.825
	30.9728	3.646	32.7284
	31.0068	3.6407	30.8955
	31.0408	3.6398	29.0536
	31.0748	3.6396	31.6584
	31.1088	3.6418	31.4484
	31.1438	3.6356	30.4035
	31.1778	3.6342	29.9362
	31.2108	3.6332	28.691
	31.2448	3.6365	30.8883
	31.2788	3.6348	30.662
	31.3138	3.6343	26.3607
	31.3488	3.6361	30.8823
	31.3838	3.6414	28.4407
	31.4178	3.6386	30.0614
	31.4518	3.6407	30.2514
	31.4858	3.6372	30.548
	31.5198	3.6399	30.4283
	31.5538	3.6393	31.0133
	31.5878	3.6368	30.7218
	31.6218	3.6365	28.8867
	31.6558	3.638	29.4393
	31.6898	3.6367	28.1241
	31.7248	3.6397	32.0727
	31.7588	3.6369	35.0121
	31.7918	3.6317	35.2636
	31.8258	3.6287	28.5193
	31.8598	3.6271	29.8593
	31.8938	3.6246	30.564
	31.9288	3.6298	29.595
	31.9628	3.6276	28.7625
	31.9978	3.6314	24.9413
	32.0318	3.6363	28.9158
	32.0668	3.6372	30.3584
	32.1018	3.6392	28.3592
	32.1348	3.6413	27.1535
	32.1698	3.6436	26.5416
	32.2039	3.6478	30.7665
	32.2379	3.6453	27.9623
	32.2709	3.6486	32.7463
	32.3049	3.6467	30.1291
	32.3389	3.6432	30.6351
	32.3729	3.6443	29.885
	32.4079	3.641	28.8375
	32.4419	3.6443	29.3752
	32.4749	3.6434	29.7514
	32.5089	3.6509	26.5094
	32.5439	3.6542	28.1221
	32.5779	3.6499	32.943
	32.6129	3.651	30.6999
	32.6459	3.6528	27.2414
	32.6799	3.6474	33.2989
	32.7149	3.6426	31.7937
	32.7499	3.6461	30.4868
	32.7829	3.6465	29.4296
	32.8159	3.6464	33.4483
	32.8499	3.6403	30.6573
	32.8849	3.639	31.2948
	32.9179	3.639	28.3275
	32.9519	3.6404	27.9235
	32.9859	3.6416	32.3286
	33.0199	3.6414	30.894
	33.0549	3.6411	31.0668
	33.0889	3.6383	32.8721
	33.1229	3.6336	33.6311
	33.1569	3.6279	30.0721
	33.1919	3.6305	29.6911
	33.2259	3.6483	30.2978
	33.2599	3.6624	36.8175
	33.2939	3.6706	38.7389
	33.3279	3.6813	42.6656
	33.3629	3.6814	41.1679
	33.3969	3.6866	41.8297
	33.4309	3.6906	49.0226
	33.4649	3.6843	44.9017
	33.4989	3.6865	43.0646
	33.5329	3.6864	45.5254
	33.5659	3.6865	45.2283
	33.5999	3.6858	42.1921
	33.6339	3.6898	46.0163
	33.6669	3.687	47.0592
	33.7009	3.6858	40.931
	33.7349	3.6922	44.6159
	33.7689	3.6899	44.6222
	33.8029	3.694	46.8795
	33.8369	3.6878	47.1008
	33.8709	3.6862	41.8605
	33.9049	3.6914	43.0568
	33.939	3.6931	44.5064
	33.974	3.6895	42.4755
	34.009	3.6936	46.5754
	34.043	3.6939	47.026
	34.078	3.6916	42.4966
	34.113	3.6966	44.4256
	34.146	3.6985	44.142
	34.181	3.6997	44.9812
	34.215	3.6972	44.2371
	34.249	3.6978	43.6303
	34.283	3.6984	42.6376
	34.318	3.7023	46.0764
	34.351	3.7002	45.1372
	34.386	3.6971	48.5087
	34.421	3.6961	44.9982
	34.455	3.6969	42.6233
	34.489	3.6987	46.5085
	34.523	3.697	45.0121
	34.558	3.6954	49.2968
	34.593	3.6965	48.5486
	34.628	3.6927	46.9132
	34.661	3.6899	42.3755
	34.695	3.6939	44.5632
	34.729	3.6955	42.1768
	34.763	3.6967	45.0489
	34.797	3.6955	44.1963
	34.831	3.6984	43.445
	34.865	3.6976	45.4725
	34.9	3.6978	43.5526
	34.934	3.7011	45.0541
	34.968	3.6972	50.1827
	35.001	3.693	46.8798
	35.036	3.6944	42.5945
	35.069	3.6928	46.3718
	35.103	3.6918	44.1154
	35.138	3.6928	43.0505
	35.174	3.6997	44.6482
	35.208	3.6999	48.6323
	35.243	3.6925	46.4093
	35.276	3.693	44.8929
	35.31	3.6897	44.4708
	35.344	3.6926	43.8127
	35.378	3.6946	39.6023
	35.412	3.6957	41.8639
	35.446	3.7031	43.5056
	35.479	3.7027	47.1414
	35.514	3.6991	47.7128
	35.549	3.6989	44.5129
	35.582	3.6999	47.5431
	35.616	3.6997	45.9252
	35.651	3.6982	44.3932
	35.6851	3.694	47.1258
	35.7181	3.6955	45.2637
	35.7531	3.6952	46.5339
	35.7881	3.694	45.4422
	35.8231	3.6945	40.7074
	35.8571	3.6985	44.8206
	35.8911	3.6974	41.7806
	35.9251	3.7009	47.7601
	35.9601	3.696	42.2744
	35.9941	3.699	44.5272
	36.0281	3.699	42.3085
	36.0621	3.7002	46.686
	36.0971	3.7027	44.0368
	36.1301	3.7022	41.5323
	36.1651	3.7041	47.1834
	36.1991	3.7026	45.326
	36.2321	3.7031	47.3809
	36.2661	3.6975	43.8218
	36.3001	3.7016	47.6481
	36.3351	3.6962	44.5892
	36.3701	3.7021	43.832
	36.4041	3.7	42.258
	36.4391	3.703	46.1057
	36.4741	3.705	49.8298
	36.5081	3.6978	44.4308
	36.5411	3.6964	43.0356
	36.5761	3.7003	43.5919
	36.6091	3.7025	45.1095
	36.6431	3.704	44.3385
	36.6771	3.7028	42.0378
	36.7111	3.7108	46.7856
	36.7451	3.7085	41.4737
	36.7791	3.7085	47.6244
	36.8131	3.7067	43.4576
	36.8481	3.7072	45.3846
	36.8811	3.7027	45.9222
	36.9151	3.7057	43.7223
	36.9501	3.7083	43.4306
	36.9841	3.7091	45.4576
	37.0191	3.7066	46.201
	37.0531	3.7106	46.805
	37.0881	3.709	44.4667
	37.1231	3.7028	44.9441
	37.1571	3.7034	43.0673
	37.1901	3.709	45.4328
	37.2241	3.7089	47.7383
	37.2581	3.7051	44.4682
	37.2931	3.7064	46.8955
	37.3261	3.705	40.5734
	37.3601	3.7079	42.399
	37.3951	3.7123	45.22
	37.4281	3.7136	43.7154
	37.4622	3.7153	44.5507
	37.4972	3.7123	46.854
	37.5322	3.7108	45.5515
	37.5672	3.7134	42.8925
	37.6022	3.7091	46.0562
	37.6372	3.7102	45.0336
	37.6702	3.71	47.0921
	37.7042	3.7073	43.3774
	37.7372	3.7109	47.7156
	37.7712	3.7073	44.3648
	37.8052	3.71	44.4041
	37.8392	3.7118	43.8655
	37.8732	3.7136	43.8464
	37.9072	3.7122	48.2451
	37.9412	3.7092	45.6698
	37.9752	3.7067	44.5133
	38.0102	3.7072	41.855
	38.0442	3.7106	46.8473
	38.0782	3.7104	46.4875
	38.1122	3.705	43.7716
	38.1472	3.7094	46.478
	38.1822	3.7091	47.1323
	38.2162	3.7057	45.0703
	38.2512	3.7043	45.1712
	38.2852	3.7063	43.4774
	38.3192	3.7105	42.0183
	38.3532	3.7119	47.2357
	38.3862	3.7145	44.5641
	38.4202	3.7091	46.8803
	38.4552	3.7101	44.0444
	38.4892	3.7124	47.5653
	38.5232	3.7097	47.9025
	38.5582	3.7035	42.9873
	38.5912	3.7043	43.8432
	38.6252	3.7054	47.6774
	38.6602	3.7033	46.5293
	38.6942	3.7026	44.594
	38.7292	3.7018	43.9397
	38.7632	3.6998	46.6082
	38.7972	3.7016	46.147
	38.8312	3.7028	45.2879
	38.8662	3.6998	44.9531
	38.9002	3.7043	42.992
	38.9342	3.7049	43.6317
	38.9682	3.7047	44.9096
	39.0022	3.7022	45.6127
	39.0372	3.7049	41.2499
	39.0712	3.7094	46.6476
	39.1042	3.7083	44.68
	39.1392	3.7058	44.9569
	39.1732	3.7088	47.8056
	39.2073	3.7036	43.9367
	39.2413	3.7061	44.5783
	39.2763	3.7086	42.461
	39.3093	3.7058	41.6465
	39.3443	3.7139	48.1142
	39.3783	3.7081	47.8689
	39.4133	3.7056	48.1057
	39.4463	3.705	45.4368
	39.4813	3.7022	44.4883
	39.5153	3.7023	43.4081
	39.5493	3.7063	43.1415
	39.5833	3.7069	43.9058
	39.6183	3.7084	41.0408
	39.6513	3.7115	43.8333
	39.6863	3.714	40.3893
	39.7203	3.7158	47.6077
	39.7533	3.7136	47.4363
	39.7873	3.7118	45.9219
	39.8213	3.7141	46.3868
	39.8553	3.7103	48.1993
	39.8893	3.7069	45.1668
	39.9243	3.703	46.4335
	39.9573	3.6999	45.0025
	39.9913	3.7039	43.7871
	40.0263	3.7053	43.6989
	40.0593	3.7073	42.8232
	40.0953	3.7136	43.9099
	40.1303	3.7108	43.1025
	40.1643	3.7101	47.158
	40.1983	3.7094	43.2757
	40.2323	3.7209	45.5831
	40.2673	3.7236	48.983
	40.3003	3.7274	47.7624
	40.3343	3.7315	50.1628
	40.3693	3.7321	49.2561
	40.4023	3.7327	47.5121
	40.4363	3.7277	51.4076
	40.4713	3.7292	51.022
	40.5043	3.7325	53.0466
	40.5383	3.7262	50.7891
	40.5733	3.7276	48.6352
	40.6073	3.7235	50.7134
	40.6413	3.7257	46.2273
	40.6753	3.7273	48.734
	40.7093	3.7356	51.6131
	40.7443	3.7326	47.6328
	40.7783	3.7309	50.2675
	40.8123	3.7324	50.971
	40.8463	3.7301	46.1587
	40.8803	3.7337	47.818
	40.9143	3.7382	50.1342
	40.9484	3.7428	52.8323
	40.9824	3.7353	53.5419
	41.0174	3.7299	51.4277
	41.0514	3.7262	53.6745
	41.0854	3.7223	49.3712
	41.1194	3.725	48.8202
	41.1534	3.7233	48.3845
	41.1884	3.7287	50.4361
	41.2234	3.7307	50.4469
	41.2584	3.7256	47.7986
	41.2914	3.731	50.7398
	41.3254	3.7243	50.976
	41.3604	3.7303	48.0311
	41.3944	3.7266	52.8094
	41.4284	3.7238	46.6721
	41.4624	3.729	51.3346
	41.4974	3.7271	50.5415
	41.5314	3.7293	50.1932
	41.5654	3.7237	54.3791
	41.5994	3.7201	52.3725
	41.6344	3.7173	51.3772
	41.6674	3.7139	51.3848
	41.7024	3.7141	47.8085
	41.7364	3.7179	47.4878
	41.7694	3.7185	50.3712
	41.8034	3.7215	48.68
	41.8374	3.7153	44.798
	41.8724	3.7247	50.4199
	41.9064	3.7262	48.6143
	41.9404	3.728	50.8674
	41.9754	3.726	48.5577
	42.0094	3.7272	50.4426
	42.0434	3.7305	50.8392
	42.0774	3.7302	48.3704
	42.1114	3.7307	46.4294
	42.1454	3.7346	47.9904
	42.1794	3.7355	50.6239
	42.2134	3.7334	51.421
	42.2474	3.7327	50.0413
	42.2814	3.7321	48.8759
	42.3164	3.7357	53.0377
	42.3494	3.7324	52.3752
	42.3834	3.733	46.642
	42.4174	3.7295	50.8244
	42.4524	3.7343	50.7347
	42.4874	3.7303	51.0598
	42.5204	3.7337	50.6038
	42.5554	3.727	48.0453
	42.5904	3.7312	49.4637
	42.6254	3.737	48.6593
	42.6594	3.7352	52.1215
	42.6945	3.7356	49.4444
	42.7295	3.7333	48.467
	42.7625	3.7331	50.2392
	42.7975	3.7383	51.3897
	42.8315	3.734	53.9991
	42.8655	3.7286	53.0818
	42.9005	3.7274	50.3456
	42.9335	3.7245	48.099
	42.9675	3.7298	50.8339
	43.0025	3.7256	51.365
	43.0375	3.7257	48.7129
	43.0725	3.7246	48.7029
	43.1065	3.7289	52.2563
	43.1405	3.7234	47.2015
	43.1755	3.7277	51.5133
	43.2095	3.7272	51.2042
	43.2425	3.7237	49.6436
	43.2765	3.7251	48.723
	43.3105	3.7226	50.7452
	43.3445	3.7222	49.7657
	43.3795	3.7241	49.2211
	43.4125	3.7253	52.9648
	43.4465	3.7196	49.4855
	43.4805	3.7202	47.0409
	43.5145	3.7232	50.517
	43.5485	3.7266	52.4768
	43.5835	3.7233	51.6544
	43.6185	3.7203	54.9951
	43.6535	3.7156	46.5925
	43.6865	3.7203	48.3712
	43.7215	3.7215	51.2005
	43.7555	3.7213	50.0751
	43.7895	3.7188	51.3864
	43.8225	3.7227	48.3544
	43.8565	3.7221	49.1238
	43.8905	3.7212	48.7501
	43.9245	3.7217	50.4587
	43.9585	3.722	49.2493
	43.9925	3.7276	45.3817
	44.0265	3.733	48.5605
	44.0615	3.7343	51.6623
	44.0945	3.7314	50.5015
	44.1295	3.7332	49.8266
	44.1635	3.7295	46.9784
	44.1975	3.7306	49.8284
	44.2325	3.7367	49.9995
	44.2675	3.7362	48.6267
	44.3015	3.742	52.4605
	44.3365	3.7338	50.912
	44.3705	3.7368	51.8083
	44.4045	3.7317	50.4429
	44.4386	3.7293	49.6716
	44.4726	3.7285	49.3526
	44.5066	3.7304	49.8306
	44.5416	3.7316	50.6864
	44.5746	3.7285	48.7612
	44.6096	3.7329	50.966
	44.6436	3.7289	50.536
	44.6776	3.7299	49.7062
	44.7106	3.7318	50.9558
	44.7456	3.7239	55.256
	44.7786	3.7231	51.6349
	44.8126	3.7176	52.2157
	44.8456	3.7143	47.3512
	44.8806	3.717	51.4395
	44.9156	3.7131	49.2696
	44.9496	3.7227	46.2992
	44.9846	3.7269	47.989
	45.0196	3.7309	50.2901
	45.0536	3.7271	52.3612
	45.0876	3.7221	48.4272
	45.1206	3.7233	51.6279
	45.1546	3.7217	50.1843
	45.1896	3.7191	49.0313
	45.2226	3.721	53.8404
	45.2566	3.7217	51.3075
	45.2916	3.713	46.1106
	45.3266	3.7222	47.7843
	45.3616	3.7281	50.5359
	45.3956	3.7261	48.761
	45.4306	3.7262	48.019
	45.4656	3.729	49.6112
	45.4986	3.7279	50.5953
	45.5326	3.727	51.791
	45.5676	3.7313	47.821
	45.6006	3.7279	49.8251
	45.6346	3.7306	51.119
	45.6686	3.7308	50.965
	45.7036	3.725	52.886
	45.7366	3.7242	48.8251
	45.7706	3.7233	53.7999
	45.8046	3.7228	51.4701
	45.8386	3.7159	49.8294
	45.8726	3.7203	51.8209
	45.9056	3.7132	55.2007
	45.9396	3.7112	50.6797
	45.9736	3.7119	50.3366
	46.0076	3.7109	46.1212
	46.0406	3.7086	46.9934
	46.0746	3.7163	47.3756
	46.1086	3.7178	52.4234
	46.1436	3.7182	51.7598
	46.1777	3.7141	48.8067
	46.2127	3.7127	49.1609
	46.2477	3.7154	47.6621
	46.2817	3.7164	50.9443
	46.3157	3.7165	49.1407
	46.3497	3.7176	51.43
	46.3837	3.717	46.5809
	46.4187	3.726	45.8014
	46.4537	3.7303	47.5097
	46.4877	3.7307	48.0046
	46.5217	3.7364	48.3094
	46.5567	3.7429	48.9054
	46.5907	3.7395	50.1353
	46.6237	3.7399	48.726
	46.6587	3.7451	51.7119
	46.6927	3.7491	50.4125
	46.7277	3.7445	50.2523
	46.7627	3.7437	50.9187
	46.7977	3.7386	54.8463
	46.8317	3.7321	51.7962
	46.8657	3.7334	49.9596
	46.9007	3.7311	52.8568
	46.9347	3.7229	50.7155
	46.9687	3.7245	48.4479
	47.0027	3.7261	48.4245
	47.0367	3.7282	49.6439
	47.0707	3.7257	52.4895
	47.1047	3.7216	46.6891
	47.1387	3.7306	52.6061
	47.1737	3.7236	50.262
	47.2067	3.725	51.0692
	47.2417	3.7233	52.377
	47.2757	3.7228	46.9815
	47.3087	3.7237	47.9465
	47.3427	3.7305	49.6484
	47.3767	3.7283	51.3159
	47.4117	3.728	53.0794
	47.4457	3.7248	48.0952
	47.4797	3.7215	50.46
	47.5137	3.7216	51.7481
	47.5477	3.7253	50.4513
	47.5817	3.7168	49.6218
	47.6167	3.7215	48.3597
	47.6497	3.7209	47.5043
	47.6837	3.733	51.63
	47.7187	3.7261	51.1548
	47.7527	3.7231	52.2264
	47.7857	3.7221	50.5537
	47.8207	3.7175	48.635
	47.8537	3.7211	50.6745
	47.8877	3.7228	48.5553
	47.9218	3.7259	50.2046
	47.9568	3.7269	50.8655
	47.9918	3.7242	48.9573
	48.0258	3.7264	50.1405
	48.0608	3.7237	50.1564
	48.0948	3.7231	49.5855
	48.1288	3.7271	47.94
	48.1628	3.7257	51.8231
	48.1968	3.7198	49.0129
	48.2308	3.7239	48.5789
	48.2648	3.7332	48.7071
	48.2988	3.7319	51.7074
	48.3328	3.7334	50.2025
	48.3668	3.7295	51.9603
	48.4018	3.7227	50.5167
	48.4358	3.7274	50.6074
	48.4698	3.7232	47.7466
	48.5038	3.7227	48.5248
	48.5388	3.7256	46.8747
	48.5748	3.7331	47.328
	48.6088	3.7366	47.3328
	48.6428	3.7412	51.0183
	48.6768	3.7375	49.4749
	48.7108	3.7387	50.4999
	48.7458	3.736	49.6842
	48.7788	3.7384	47.1469
	48.8138	3.7437	50.0063
	48.8478	3.7408	50.7552
	48.8808	3.7404	50.8915
	48.9148	3.7356	51.3478
	48.9488	3.7363	52.3767
	48.9828	3.7326	48.306
	49.0178	3.7372	50.1547
	49.0518	3.7334	49.014
	49.0848	3.742	50.8584
	49.1198	3.7382	51.7534
	49.1548	3.7372	48.1364
	49.1898	3.7369	49.0795
	49.2248	3.7353	48.3346
	49.2588	3.7397	50.8531
	49.2928	3.7387	51.1315
	49.3268	3.7428	48.2041
	49.3618	3.7426	46.6583
	49.3948	3.7437	49.2541
	49.4288	3.7471	49.844
	49.4638	3.7547	51.0655
	49.4968	3.7515	52.3994
	49.5308	3.7455	53.4675
	49.5648	3.7372	52.4091
	49.5988	3.7363	50.5811
	49.6328	3.7385	52.0083
	49.6668	3.7314	45.255
	49.7009	3.7445	49.0116
	49.7359	3.7391	49.5358
	49.7719	3.7453	49.38
	49.8049	3.7435	48.522
	49.8399	3.7422	51.6678
	49.8739	3.7405	50.1779
	49.9079	3.741	50.1976
	49.9429	3.7382	52.104
	49.9769	3.7335	50.248
	50.0099	3.7352	50.2975
	50.0449	3.7358	52.1331
	50.0779	3.7288	50.3824
	50.1119	3.7323	46.5413
	50.1459	3.7395	51.8498
	50.1809	3.7329	51.4948
	50.2149	3.7353	50.9314
	50.2489	3.7298	49.7618
	50.2839	3.7304	52.6907
	50.3179	3.7302	52.0049
	50.3519	3.723	50.0966
	50.3869	3.7222	51.5189
	50.4199	3.724	48.8273
	50.4549	3.7268	50.0061
	50.4889	3.7238	46.4389
	50.5229	3.7283	49.496
	50.5569	3.7261	48.7876
	50.5909	3.732	48.4849
	50.6249	3.7318	48.6783
	50.6589	3.7297	52.1693
	50.6939	3.7328	51.3872
	50.7269	3.7244	49.7029
	50.7619	3.7286	48.2259
	50.7959	3.7316	49.4649
	50.8289	3.7254	48.9243
	50.8629	3.7317	49.5329
	50.8969	3.7285	49.9924
	50.9309	3.7336	47.6937
	50.9649	3.734	50.0839
	50.9999	3.7387	49.7537
	51.0339	3.7369	50.1846
	51.0689	3.7344	50.8342
	51.1029	3.7339	52.3421
	51.1379	3.7317	52.4787
	51.1719	3.7312	47.0863
	51.2059	3.7319	49.9111
	51.2399	3.7298	49.9515
	51.2739	3.7355	44.382
	51.3079	3.7449	52.8406
	51.3419	3.7349	50.1271
	51.3769	3.7382	51.7969
	51.4099	3.7318	49.0486
	51.444	3.732	52.3094
	51.478	3.7285	46.1348
	51.512	3.736	52.1654
	51.546	3.7309	50.4993
	51.58	3.7302	50.0532
	51.613	3.7325	52.4394
	51.648	3.7309	49.2589
	51.683	3.7293	50.8524
	51.718	3.724	51.4961
	51.753	3.7285	52.6191
	51.786	3.7249	53.2953
	51.821	3.7215	53.8302
	51.855	3.7175	52.0549
	51.889	3.7108	50.916
	51.923	3.7155	50.05
	51.957	3.7126	48.6225
	51.99	3.7109	51.1287
	52.024	3.7107	51.8318
	52.058	3.7114	50.5101
	52.093	3.7093	49.1234
	52.126	3.7141	48.608
	52.162	3.7129	50.6478
	52.196	3.7095	51.6569
	52.23	3.7083	48.8339
	52.265	3.7074	51.6636
	52.299	3.7072	50.2385
	52.334	3.7089	50.1491
	52.368	3.7008	50.7962
	52.402	3.7087	51.2791
	52.436	3.7068	49.6981
	52.47	3.7076	47.4174
	52.504	3.7097	47.3348
	52.538	3.7108	51.9422
	52.573	3.7107	50.3318
	52.607	3.7128	48.4234
	52.64	3.7129	47.4286
	52.675	3.7163	50.111
	52.709	3.7151	48.35
	52.742	3.7156	52.5718
	52.776	3.7101	50.075
	52.811	3.712	50.2443
	52.846	3.7135	43.8043
	52.88	3.7177	50.6393
	52.914	3.7239	50.7982
	52.949	3.722	48.2911
	52.983	3.7226	52.2792
	53.016	3.7216	47.2392
	53.051	3.7223	51.5545
	53.084	3.7185	46.4786
	53.118	3.7243	46.5098
	53.153	3.7322	49.0377
	53.1881	3.7417	49.7434
	53.2221	3.7443	50.0558
	53.2571	3.7567	54.5937
	53.2921	3.754	52.1715
	53.3261	3.7624	51.5328
	53.3601	3.7676	49.8934
	53.3941	3.7839	52.7931
	53.4291	3.7893	56.0961
	53.4631	3.7842	57.3114
	53.4981	3.7841	57.0014
	53.5321	3.7796	52.9968
	53.5671	3.7763	52.9353
	53.6001	3.7844	53.857
	53.6341	3.7878	54.9234
	53.6681	3.7785	53.388
	53.7031	3.7946	55.0593
	53.7371	3.7989	49.6969
	53.7701	3.8201	54.9493
	53.8041	3.8152	50.5864
	53.8391	3.8277	52.7712
	53.8731	3.8371	54.9974
	53.9081	3.8312	57.6184
	53.9421	3.8331	54.188
	53.9771	3.832	53.7209
	54.0111	3.831	56.4732
	54.0461	3.8337	55.0423
	54.0801	3.8251	58.9622
	54.1141	3.822	60.7538
	54.1481	3.8055	56.4361
	54.1831	3.7976	56.8001
	54.2171	3.8001	57.0125
	54.2511	3.7878	58.9869
	54.2851	3.7811	55.7207
	54.3201	3.7814	55.3092
	54.3531	3.7815	52.912
	54.3881	3.7808	52.0524
	54.4221	3.8013	54.8359
	54.4561	3.8051	54.2014
	54.4911	3.804	52.1276
	54.5261	3.8115	54.098
	54.5601	3.8117	53.6327
	54.5941	3.8157	54.5502
	54.6291	3.8156	54.4876
	54.6621	3.8185	54.0531
	54.6961	3.8242	59.1701
	54.7311	3.814	56.8416
	54.7641	3.8091	50.9595
	54.7991	3.8232	53.9906
	54.8331	3.8244	53.5117
	54.8671	3.8263	57.2604
	54.9011	3.823	56.2194
	54.9352	3.8166	50.0691
	54.9692	3.8321	55.6884
	55.0042	3.8254	54.3466
	55.0372	3.8345	53.9612
	55.0722	3.8252	55.7416
	55.1062	3.8318	55.3949
	55.1402	3.8329	56.118
	55.1762	3.8351	53.0155
	55.2112	3.836	52.4073
	55.2462	3.8407	54.9676
	55.2792	3.8441	56.3286
	55.3142	3.8412	58.2391
	55.3472	3.8323	57.4868
	55.3812	3.8366	55.1788
	55.4152	3.8338	52.2426
	55.4492	3.8397	52.8033
	55.4832	3.8391	52.5874
	55.5172	3.8465	52.9404
	55.5512	3.8533	53.1018
	55.5862	3.8624	53.7303
	55.6192	3.8598	52.7882
	55.6542	3.8658	55.1501
	55.6882	3.8697	52.833
	55.7232	3.8778	52.7813
	55.7582	3.8751	55.3153
	55.7922	3.8726	57.9262
	55.8272	3.8722	56.2303
	55.8612	3.8693	54.7681
	55.8962	3.8704	55.9866
	55.9302	3.8671	56.7421
	55.9652	3.8671	52.814
	55.9992	3.8779	56.1183
	56.0332	3.8713	52.6
	56.0682	3.8761	57.5918
	56.1012	3.8711	51.0196
	56.1352	3.8751	58.3301
	56.1702	3.8697	54.6151
	56.2052	3.8647	54.5449
	56.2402	3.874	56.9656
	56.2742	3.8731	53.1523
	56.3082	3.8764	53.2249
	56.3422	3.8802	52.6031
	56.3762	3.8829	54.367
	56.4102	3.8909	56.1718
	56.4442	3.8856	52.5172
	56.4782	3.8894	56.7291
	56.5132	3.8874	55.9804
	56.5472	3.8939	55.3476
	56.5812	3.8923	57.9029
	56.6152	3.8776	51.9776
	56.6502	3.8877	56.8143
	56.6833	3.8874	56.076
	56.7173	3.8797	52.0963
	56.7523	3.8882	57.065
	56.7863	3.8832	55.2667
	56.8213	3.8849	54.1239
	56.8543	3.8864	54.5311
	56.8903	3.8744	53.2411
	56.9243	3.8893	55.6127
	56.9573	3.8947	55.5928
	56.9923	3.8854	53.2089
	57.0253	3.8899	57.6518
	57.0593	3.8817	58.6632
	57.0933	3.8818	54.6912
	57.1273	3.8813	57.3162
	57.1603	3.8741	55.2722
	57.1943	3.8783	54.3619
	57.2293	3.8737	54.3593
	57.2623	3.8768	55.7009
	57.2953	3.8781	55.5345
	57.3303	3.8839	55.3732
	57.3633	3.8738	52.7878
	57.3983	3.8773	53.1944
	57.4333	3.8758	53.542
	57.4673	3.89	54.744
	57.5023	3.8823	53.9292
	57.5363	3.8909	51.2471
	57.5713	3.8956	59.2336
	57.6053	3.89	52.5399
	57.6393	3.8966	59.1963
	57.6733	3.8876	57.012
	57.7073	3.8801	55.3457
	57.7413	3.8788	53.8917
	57.7753	3.8819	54.3112
	57.8093	3.882	54.5884
	57.8433	3.8862	57.6057
	57.8773	3.8833	52.1057
	57.9123	3.8875	52.5087
	57.9473	3.8881	58.5244
	57.9803	3.8828	53.0386
	58.0143	3.8846	56.9947
	58.0493	3.8814	56.1457
	58.0843	3.8829	55.1052
	58.1193	3.8815	53.9075
	58.1543	3.8847	56.3587
	58.1893	3.8794	55.4291
	58.2223	3.8792	58.0765
	58.2563	3.8748	56.479
	58.2903	3.8731	55.5458
	58.3243	3.8694	53.1985
	58.3593	3.8796	58.5605
	58.3923	3.8758	57.6153
	58.4274	3.8696	57.7251
	58.4614	3.8595	52.4315
	58.4944	3.8679	51.9466
	58.5284	3.8762	55.931
	58.5624	3.8717	53.7815
	58.5974	3.8803	51.9856
	58.6314	3.8868	52.5539
	58.6664	3.8886	57.7231
	58.7004	3.8831	56.2749
	58.7334	3.8929	55.7433
	58.7684	3.8867	50.2842
	58.8024	3.8931	49.7724
	58.8364	3.902	58.9959
	58.8704	3.8982	58.0398
	58.9044	3.8921	56.751
	58.9394	3.8919	51.9807
	58.9724	3.897	55.3833
	59.0074	3.9042	54.3726
	59.0424	3.898	56.2744
	59.0764	3.8986	54.7475
	59.1094	3.9018	56.4377
	59.1434	3.9002	54.5276
	59.1784	3.8962	53.175
	59.2124	3.9017	57.6591
	59.2474	3.8986	52.0292
	59.2814	3.8987	54.9874
	59.3154	3.9048	52.2934
	59.3504	3.9049	52.2859
	59.3844	3.9146	55.7765
	59.4194	3.9141	55.7794
	59.4524	3.9104	54.9155
	59.4864	3.9184	55.1714
	59.5204	3.9125	51.9077
	59.5544	3.92	56.6238
	59.5884	3.9214	55.7535
	59.6224	3.9188	51.7841
	59.6564	3.9222	52.7071
	59.6904	3.9365	55.6067
	59.7244	3.9398	53.2796
	59.7584	3.937	54.5286
	59.7924	3.9408	55.2382
	59.8264	3.9384	55.7096
	59.8614	3.9434	56.9072
	59.8964	3.9368	53.6478
	59.9304	3.9357	54.4316
	59.9654	3.9366	54.0612
	59.9994	3.9407	54.9677
	60.0334	3.9454	52.4776
	60.0674	3.949	53.9906
	60.1014	3.9479	53.1496
	60.1354	3.952	53.6126
	60.1705	3.9612	55.8852
	60.2045	3.9575	56.0001
	60.2395	3.9548	55.4639
	60.2725	3.9566	51.7831
	60.3075	3.9626	53.577
	60.3405	3.9719	53.5891
	60.3755	3.9747	54.7408
	60.4085	3.9806	52.1901
	60.4435	3.9883	55.5556
	60.4775	3.9813	57.3697
	60.5125	3.9801	53.9542
	60.5455	3.9756	57.0449
	60.5805	3.97	55.7968
	60.6155	3.9777	54.7386
	60.6625	3.9775	49.0487
	60.6965	3.9941	56.7776
	60.7315	3.9874	57.1953
	60.7665	3.988	57.5317
	60.7995	3.9787	55.5086
	60.8335	3.974	54.1389
	60.8675	3.9791	55.4198
	60.9015	3.9807	52.8764
	60.9355	3.9809	56.7961
	60.9705	3.9834	56.6696
	61.0055	3.9794	53.0326
	61.0395	3.9862	52.5877
	61.0725	3.9966	54.7987
	61.1065	3.9958	50.2328
	61.1415	4.0093	50.2622
	61.1775	4.0175	50.7727
	61.2105	4.034	54.4354
	61.2455	4.0323	54.727
	61.2795	4.0383	56.2123
	61.3135	4.0395	52.6551
	61.3475	4.0406	54.531
	61.3815	4.0387	56.4243
	61.4155	4.042	58.3926
	61.4495	4.0319	57.0221
	61.4835	4.0251	53.8473
	61.5165	4.023	52.0568
	61.5505	4.0291	54.4807
	61.5855	4.0384	53.2925
	61.6195	4.0406	54.2255
	61.6535	4.0401	56.2818
	61.6875	4.0475	57.1895
	61.7215	4.0295	57.8392
	61.7565	4.0262	54.4346
	61.7915	4.0244	55.4228
	61.8255	4.0264	55.3811
	61.8605	4.0274	57.2347
	61.8945	4.019	56.0591
	61.9286	4.0248	57.8343
	61.9626	4.0246	56.7603
	61.9966	4.0195	57.6444
	62.0316	4.0073	55.667
	62.0646	4.0045	57.9348
	62.0986	4.0045	55.5486
	62.1326	4.0061	54.6708
	62.1676	4.0103	52.4719
	62.2026	4.0168	55.8273
	62.2356	4.0153	51.1911
	62.2706	4.0172	51.5961
	62.3036	4.0283	51.8051
	62.3386	4.0396	54.8409
	62.3726	4.0376	56.9354
	62.4066	4.0365	55.417
	62.4406	4.0378	54.3205
	62.4746	4.0335	52.5188
	62.5096	4.0436	56.5499
	62.5446	4.0391	52.7382
	62.5776	4.0492	55.2623
	62.6116	4.0504	55.1928
	62.6456	4.0487	52.6252
	62.6796	4.0537	55.832
	62.7136	4.0528	54.2844
	62.7476	4.0525	56.8106
	62.7816	4.0543	53.0068
	62.8166	4.0551	51.7193
	62.8506	4.0626	53.3049
	62.8856	4.0709	50.7662
	62.9196	4.0751	55.9965
	62.9536	4.0742	54.3485
	62.9876	4.0786	53.6008
	63.0226	4.0816	53.1107
	63.0566	4.083	54.3766
	63.0896	4.0902	55.1804
	63.1246	4.0868	53.6457
	63.1586	4.0896	53.7452
	63.1936	4.1035	51.6323
	63.2266	4.1012	58.0922
	63.2616	4.1013	53.43
	63.2946	4.1106	51.9507
	63.3296	4.1097	56.6873
	63.3626	4.108	55.7343
	63.3966	4.1084	55.4498
	63.4306	4.1081	54.9385
	63.4646	4.1051	55.6283
	63.4986	4.1113	57.6775
	63.5336	4.1031	54.679
	63.5686	4.1032	58.5578
	63.6036	4.0946	54.8337
	63.6396	4.0929	54.0469
	63.6767	4.0941	53.7312
	63.7117	4.1004	54.8374
	63.7457	4.1051	56.7301
	63.7807	4.1024	54.4976
	63.8157	4.103	53.5986
	63.8507	4.108	54.9918
	63.8847	4.1063	53.5376
	63.9217	4.1032	54.947
	63.9577	4.1105	54.7931
	63.9927	4.1128	53.8934
	64.0277	4.1165	56.1489
	64.0617	4.1155	57.5507
	64.0967	4.1046	56.0395
	64.1307	4.0972	57.0069
	64.1657	4.0935	54.7839
	64.1997	4.1004	55.8343
	64.2367	4.0949	55.1726
	64.2727	4.0961	57.0135
	64.3077	4.0884	59.5456
	64.3427	4.0822	51.6555
	64.3777	4.0952	53.0945
	64.4127	4.1023	51.6705
	64.4477	4.1118	54.5786
	64.4827	4.1079	54.5951
	64.5167	4.1117	50.8313
	64.5527	4.1195	50.8789
	64.5887	4.1211	53.1245
	64.6227	4.1326	55.205
	64.6577	4.1422	55.0749
	64.6927	4.1385	55.9907
	64.7277	4.1335	57.6708
	64.7617	4.1218	56.0489
	64.7967	4.1231	54.1586
	64.8317	4.1299	57.9913
	64.8657	4.1161	57.4954
	64.9007	4.1192	55.9999
	64.9377	4.1126	56.619
	64.9727	4.1067	56.8847
	65.0067	4.1043	56.7557
	65.0417	4.1019	51.9924
	65.0767	4.1112	56.3096
	65.1117	4.1078	54.3685
	65.1457	4.1071	52.77
	65.1807	4.1118	54.6014
	65.2157	4.1161	52.5043
	65.2507	4.1212	53.6787
	65.2837	4.1276	59.1824
	65.3187	4.113	53.7689
	65.3537	4.1114	53.9624
	65.3887	4.1171	54.1443
	65.4488	4.1169	51.5914
	65.5238	4.1315	55.5595
	65.5738	4.127	56.3398
	65.6138	4.1272	53.3675
	65.6658	4.1309	54.1458
	65.7098	4.137	57.2918
	65.7528	4.1233	57.6257
	65.7928	4.1221	54.9587
	65.8278	4.1145	51.2611
	65.8628	4.1314	56.4292
	65.8988	4.1231	57.328
	65.9348	4.1223	55.7517
	65.9698	4.1179	54.3676
	66.0048	4.1285	56.6232
	66.0398	4.1177	51.7011
	66.0748	4.1199	53.0729
	66.1098	4.1355	55.8449
	66.1448	4.1315	58.0234
	66.1798	4.1311	56.5265
	66.2158	4.1341	56.0581
	66.2518	4.125	53.9505
	66.2858	4.1283	52.3003
	66.3198	4.1416	51.3092
	66.3538	4.1458	54.035
	66.3878	4.1484	53.6088
	66.4218	4.1494	59.4265
	66.4568	4.1428	58.6709
	66.4898	4.138	55.9557
	66.5248	4.1435	51.3111
	66.5598	4.1436	55.6242
	66.5938	4.1415	54.3188
	66.6298	4.1482	53.6355
	66.6648	4.1449	55.6503
	66.7008	4.1482	52.7216
	66.7348	4.1463	55.2408
	66.7698	4.1467	57.4577
	66.8028	4.1423	53.9683
	66.8378	4.1481	56.4904
	66.8708	4.1446	54.966
	66.9048	4.1446	55.3017
	66.9398	4.1435	59.5513
	66.9738	4.1378	53.5847
	67.0068	4.1403	54.1815
	67.0418	4.1413	56.4835
	67.0758	4.133	51.7163
	67.1118	4.1435	56.1544
	67.1468	4.1391	54.9092
	67.2119	4.1443	55.9873
	67.2489	4.1425	59.1866
	67.2839	4.1381	56.4252
	67.3179	4.1375	57.836
	67.3519	4.1327	53.2892
	67.3869	4.1348	52.4776
	67.4199	4.1427	51.1496
	67.4549	4.1515	52.881
	67.4899	4.1521	52.5674
	67.5249	4.1652	55.7857
	67.5589	4.1611	51.3856
	67.5929	4.1614	53.5496
	67.6289	4.1715	55.3386
	67.6639	4.1688	53.0135
	67.6989	4.1697	54.6794
	67.7339	4.1803	57.9291
	67.7679	4.1713	57.9538
	67.8019	4.1664	56.4369
	67.8369	4.1609	56.6074
	67.8729	4.1617	53.9641
	67.9069	4.1651	52.6924
	67.9419	4.1633	56.1357
	67.9779	4.1686	54.8556
	68.0139	4.1633	54.9791
	68.0499	4.1755	57.8195
	68.0839	4.1672	54.7323
	68.1179	4.1692	51.5837
	68.1529	4.179	52.014
	68.1869	4.184	53.4385
	68.2219	4.182	55.4972
	68.2569	4.1818	58.7645
	68.2909	4.1844	55.167
	68.3259	4.1785	50.4552
	68.3619	4.1872	53.7837
	68.4709	4.1898	57.0655
	68.5189	4.1898	51.8927
	68.5599	4.1955	53.5838
	68.6139	4.2	52.3075
	68.6759	4.2032	56.4556
	68.7369	4.2035	54.4585
	68.7839	4.2108	54.8137
	68.8299	4.2085	51.8621
	68.8769	4.2152	53.766
[truncated: 6,943 more rows]

## Sheet: Fig 5B
	Time, s	L, µm	Force, pN
	0	4.9167	3.4205
	0.035	4.9134	3.359
	0.07	4.9125	3.2531
	0.104	4.9112	3.1493
	0.139	4.9138	3.2238
	0.174	4.9205	3.1114
	0.208	4.9171	3.3028
	0.243	4.9058	3.4227
	0.278	4.9077	3.3685
	0.312	4.9036	3.4894
	0.347	4.9104	3.2932
	0.382	4.9007	3.3665
	0.416	4.8958	3.5302
	0.451	4.9025	3.4737
	0.486	4.9032	3.2217
	0.521	4.9051	3.212
	0.556	4.9059	2.9264
	0.592	4.9006	3.0121
	0.627	4.894	2.9875
	0.662	4.9126	2.6855
	0.696	4.9003	3.0009
	0.731	4.9041	3.0324
	0.766	4.8987	3.1527
	0.801	4.8929	3.5298
	0.836	4.8921	3.5991
	0.871	4.891	3.3027
	0.906	4.8943	3.2207
	0.941	4.9006	2.9175
	0.976	4.8878	2.8374
	1.011	4.9013	2.0311
	1.046	4.9051	1.8804
	1.081	4.8953	2.1373
	1.116	4.9097	1.7393
	1.151	4.9107	2.2711
	1.186	4.9104	2.5056
	1.221	4.9118	2.7128
	1.257	4.9195	2.7159
	1.291	4.9212	2.9316
	1.325	4.9188	2.9625
	1.3601	4.9213	3.1476
	1.3951	4.9203	3.3432
	1.4301	4.9226	3.2531
	1.4651	4.9177	3.2842
	1.5001	4.92	3.4296
	1.5351	4.9246	3.002
	1.5701	4.9141	3.3943
	1.6051	4.9158	3.2223
	1.6401	4.9138	3.2953
	1.6751	4.9033	3.3397
	1.7101	4.9096	3.2813
	1.7451	4.9116	2.9775
	1.7801	4.9066	3.2346
	1.8151	4.9097	3.2301
	1.8501	4.9099	3.3793
	1.8851	4.9012	3.5133
	1.9201	4.9044	3.3432
	1.9541	4.916	3.203
	1.9891	4.9089	3.3224
	2.0241	4.9051	2.9346
	2.0591	4.8958	3.3769
	2.0941	4.8876	3.6715
	2.1291	4.8998	3.311
	2.1641	4.8904	3.1612
	2.1991	4.8957	2.5088
	2.2351	4.9001	2.4924
	2.2691	4.9014	2.9908
	2.3041	4.894	3.2802
	2.3391	4.902	3.2225
	2.3741	4.9023	3.0665
	2.4091	4.9082	2.779
	2.4441	4.8994	2.9376
	2.4791	4.9027	3.0004
	2.5141	4.9019	3.1168
	2.5501	4.9002	3.079
	2.5861	4.8982	3.0175
	2.6211	4.8918	2.9207
	2.6561	4.8876	3.1314
	2.6911	4.8961	3.0693
	2.7251	4.8954	2.8382
	2.7601	4.9132	2.6984
	2.7941	4.8996	2.7402
	2.8291	4.9066	2.7128
	2.8631	4.8973	2.991
	2.8981	4.8949	3.0595
	2.9331	4.8897	3.3524
	2.9681	4.8841	3.4856
	3.0031	4.8896	2.9691
	3.0381	4.8895	3.0212
	3.0721	4.8822	3.1866
	3.1072	4.8739	3.434
	3.1422	4.8726	3.1075
	3.1762	4.8635	3.4019
	3.2112	4.8678	3.2523
	3.2462	4.8759	2.9815
	3.2822	4.8755	3.0086
	3.3172	4.8823	2.8996
	3.3522	4.8838	2.8648
	3.3872	4.8853	2.7272
	3.4212	4.8939	2.7119
	3.4552	4.8871	2.6509
	3.4902	4.8905	2.7759
	3.5252	4.8975	2.8566
	3.5612	4.8986	2.7533
	3.5952	4.889	3.009
	3.6312	4.8958	2.8896
	3.6652	4.8963	3.0233
	3.7002	4.891	2.9035
	3.7352	4.9044	2.5752
	3.7702	4.91	2.55
	3.8052	4.9053	2.3468
	3.8402	4.906	2.7491
	3.8752	4.9009	2.627
	3.9102	4.9041	2.6801
	3.9452	4.9061	2.5209
	3.9802	4.9104	2.8473
	4.0162	4.905	3.0025
	4.0502	4.9099	2.9748
	4.0852	4.8999	3.1376
	4.1202	4.9027	3.1708
	4.1552	4.8967	3.387
	4.1902	4.9001	3.3322
	4.2252	4.9065	2.923
	4.2602	4.8991	3.3579
	4.2952	4.8901	3.1934
	4.3302	4.8966	3.1024
	4.3652	4.8929	2.9997
	4.4002	4.8949	2.9369
	4.4352	4.8915	3.0768
	4.4702	4.8943	2.6942
	4.5052	4.8892	2.9842
	4.5402	4.8967	2.5891
	4.5752	4.8873	2.908
	4.6112	4.8883	2.2152
	4.6462	4.894	2.1838
	4.6822	4.9064	2.4552
	4.7172	4.902	2.6989
	4.7512	4.8988	2.8087
	4.7862	4.9074	2.6816
	4.8202	4.9077	2.8416
	4.8542	4.9032	2.9381
	4.8893	4.8918	3.2889
	4.9243	4.9025	2.7777
	4.9583	4.8998	3.0655
	4.9933	4.9004	3.3974
	5.0283	4.8995	3.4254
	5.0633	4.8909	3.5383
	5.0983	4.8886	3.7114
	5.1333	4.8841	3.8105
	5.1683	4.8881	3.6789
	5.2023	4.8836	3.4949
	5.2363	4.8842	3.6745
	5.2703	4.8888	3.3168
	5.3053	4.872	3.4507
	5.3403	4.8693	3.5655
	5.3753	4.8756	3.3996
	5.4103	4.8801	3.1018
	5.4443	4.87	3.5328
	5.4793	4.8713	3.3202
	5.5133	4.8651	3.6272
	5.5483	4.8594	3.6046
	5.5833	4.8535	3.6218
	5.6173	4.8583	3.5165
	5.6533	4.8581	3.417
	5.6883	4.856	3.3432
	5.7243	4.8543	3.0663
	5.7593	4.8598	2.9385
	5.7943	4.8563	2.7542
	5.8293	4.856	2.8983
	5.8643	4.8602	2.7431
	5.8993	4.8524	3.1616
	5.9333	4.8544	3.1917
	5.9683	4.8523	3.2803
	6.0033	4.8487	3.0924
	6.0373	4.8444	2.8945
	6.0723	4.8487	2.8466
	6.1063	4.8373	3.2001
	6.1413	4.8507	2.7393
	6.1763	4.8492	2.5287
	6.2113	4.8438	2.9384
	6.2463	4.8434	2.723
	6.2813	4.8515	2.7321
	6.3153	4.845	3.1159
	6.3493	4.8412	3.0287
	6.3843	4.842	3.2078
	6.4193	4.8433	3.0809
	6.4543	4.8234	3.5876
	6.4893	4.8266	3.3599
	6.5243	4.8268	3.3183
	6.5603	4.8332	3.298
	6.5953	4.8276	3.2898
	6.6314	4.8364	3.2606
	6.6664	4.8348	3.3441
	6.7014	4.8222	3.6586
	6.7364	4.8226	3.5728
	6.7724	4.8255	3.5375
	6.8074	4.8275	3.4205
	6.8434	4.8277	3.3104
	6.8774	4.8232	3.1852
	6.9124	4.8087	3.5247
	6.9474	4.8185	3.3277
	6.9824	4.8016	3.2379
	7.0174	4.8143	2.9524
	7.0524	4.8223	2.772
	7.0874	4.8226	2.7284
	7.1224	4.8157	2.8484
	7.1584	4.8264	2.8029
	7.1924	4.8195	2.6846
	7.2274	4.8207	2.614
	7.2614	4.8209	2.9357
	7.2954	4.8194	2.9943
	7.3294	4.8151	3.1404
	7.3644	4.8343	2.7625
	7.3994	4.8316	2.9342
	7.4344	4.8407	2.6334
	7.4694	4.8367	2.7452
	7.5054	4.8277	2.9653
	7.5404	4.8294	2.7918
	7.5754	4.8456	2.5892
	7.6104	4.8427	2.5235
	7.6454	4.8454	2.5935
	7.6804	4.8453	2.4656
	7.7154	4.8334	2.8171
	7.7504	4.8415	2.3852
	7.7854	4.8432	2.5801
	7.8214	4.8494	2.592
	7.8564	4.8498	2.6656
	7.8914	4.8474	2.8681
	7.9264	4.8404	3.1423
	7.9614	4.8441	3.1216
	7.9964	4.8466	2.9624
	8.0314	4.844	2.9077
	8.0664	4.8532	2.5212
	8.1014	4.8444	2.8939
	8.1374	4.8514	2.8445
	8.1724	4.8575	2.7277
	8.2074	4.8613	2.6945
	8.2424	4.8605	3.0145
	8.2774	4.8513	3.1401
	8.3124	4.8501	3.1552
	8.3474	4.8542	3.1252
	8.3825	4.861	3.0271
	8.4175	4.8484	3.4128
	8.4535	4.8585	3.4822
	8.4875	4.8509	3.5817
	8.5215	4.8561	3.6287
	8.5565	4.846	3.5443
	8.5915	4.8403	3.7166
	8.6265	4.8468	3.4533
	8.6615	4.8484	3.3258
	8.6965	4.8393	3.6611
	8.7315	4.839	3.256
	8.7675	4.8412	3.0175
	8.8025	4.8418	2.8627
	8.8375	4.8519	2.5674
	8.8725	4.8488	2.7776
	8.9075	4.858	2.8297
	8.9425	4.8551	2.7354
	8.9765	4.8564	2.7229
	9.0115	4.8523	2.6778
	9.0465	4.8583	2.6716
	9.0815	4.8636	2.3199
	9.1165	4.8675	2.3396
	9.1515	4.8695	2.3901
	9.1875	4.8735	2.4428
	9.2225	4.8749	2.1582
	9.2565	4.8722	2.5352
	9.2915	4.8722	2.4578
	9.3265	4.8722	2.7745
	9.3615	4.8705	2.727
	9.3965	4.872	2.7017
	9.4315	4.8741	2.568
	9.4665	4.8792	2.277
	9.5015	4.8789	2.5992
	9.5365	4.8754	2.6668
	9.5715	4.8768	2.3973
	9.6055	4.8726	2.3587
	9.6405	4.8742	2.6775
	9.6755	4.878	2.6038
	9.7105	4.887	2.5216
	9.7455	4.8865	2.9625
	9.7815	4.8952	2.7706
	9.8165	4.8897	3.1234
	9.8525	4.8867	2.9684
	9.8865	4.8864	3.1252
	9.9215	4.8895	3.1261
	9.9565	4.8873	2.9676
	9.9915	4.8867	3.0664
	10.0265	4.8782	3.1323
	10.0615	4.8859	3.0576
	10.0965	4.8911	3.048
	10.1326	4.8969	3.2407
	10.1666	4.8838	3.1769
	10.2016	4.8865	3.1999
	10.2366	4.893	3.0455
	10.2716	4.8893	3.0112
	10.3066	4.8906	3.2416
	10.3416	4.889	2.6711
	10.3766	4.886	3.1515
	10.4116	4.8888	3.4014
	10.4466	4.8833	3.1262
	10.4816	4.8855	3.2161
	10.5166	4.8817	3.1855
	10.5516	4.877	3.416
	10.5866	4.8815	3.2472
	10.6216	4.8831	3.1216
	10.6566	4.8705	3.5221
	10.6916	4.8729	3.4309
	10.7266	4.8756	2.9927
	10.7606	4.8849	3.0212
	10.7956	4.8764	3.0404
	10.8316	4.8749	3.063
	10.8666	4.8703	3.22
	10.9016	4.871	3.0589
	10.9366	4.867	3.1411
	10.9716	4.8693	3.0259
	11.0066	4.8654	3.2166
	11.0406	4.8596	3.3528
	11.0746	4.8611	3.5737
	11.1096	4.8558	3.3305
	11.1456	4.8574	3.4261
	11.1796	4.86	3.2582
	11.2136	4.8583	3.2146
	11.2496	4.8484	3.639
	11.2836	4.8604	3.1415
	11.3176	4.8477	3.1384
	11.3526	4.8566	2.8703
	11.3866	4.8541	3.0173
	11.4216	4.8616	3.177
	11.4556	4.8525	3.3835
	11.4906	4.8593	3.1448
	11.5256	4.8476	3.5324
	11.5606	4.8588	3.0617
	11.5956	4.8524	3.2962
	11.6306	4.8566	3.1629
	11.6656	4.86	3.0813
	11.7006	4.8513	3.3843
	11.7346	4.8537	3.1836
	11.7696	4.8462	3.3357
	11.8046	4.8485	3.1373
	11.8396	4.8435	3.4302
	11.8747	4.8389	3.5032
	11.9097	4.833	3.4091
	11.9447	4.8437	3.2796
	11.9797	4.8267	3.6156
	12.0147	4.8237	3.4705
	12.0497	4.8335	3.2071
	12.0847	4.8333	3.344
	12.1197	4.8299	3.2711
	12.1547	4.8276	3.1776
	12.1897	4.8214	3.5355
	12.2247	4.8189	3.3978
	12.2607	4.8059	3.4514
	12.2957	4.8186	3.175
	12.3307	4.8163	3.3975
	12.3657	4.8242	3.1553
	12.4007	4.8136	3.214
	12.4357	4.8209	2.8491
	12.4707	4.8144	3.0999
	12.5057	4.7995	3.4701
	12.5397	4.8056	3.2423
	12.5757	4.815	2.7919
	12.6097	4.8205	2.7202
	12.6437	4.8187	2.9671
	12.6787	4.8152	2.5898
	12.7137	4.8242	2.4127
	12.7487	4.8288	2.2727
	12.7837	4.8181	2.61
	12.8187	4.8313	2.1396
	12.8537	4.821	2.6075
	12.8877	4.8289	2.31
	12.9227	4.8371	2.2552
	12.9577	4.8366	2.3634
	12.9927	4.8424	2.213
	13.0267	4.8369	2.2423
	13.0617	4.8502	2.2247
	13.0967	4.8425	2.4072
	13.1307	4.8534	2.2679
	13.1657	4.8497	2.3584
	13.1997	4.8547	2.3586
	13.2337	4.8538	2.2994
	13.2697	4.8504	2.6064
	13.3037	4.8596	2.6012
	13.3387	4.8573	2.5105
	13.3737	4.8613	2.7572
	13.4087	4.8649	2.4098
	13.4437	4.8707	2.4377
	13.4787	4.8774	2.333
	13.5137	4.878	2.6506
	13.5487	4.8756	2.5944
	13.5837	4.8769	2.7919
	13.6188	4.8753	3.0217
	13.6538	4.8772	2.7394
	13.6888	4.8723	2.9745
	13.7248	4.8757	2.8735
	13.7608	4.877	2.9719
	13.7948	4.8835	2.6967
	13.8298	4.8861	2.6023
	13.8648	4.885	2.7627
	13.8998	4.8838	2.8708
	13.9348	4.8763	3.2053
	13.9698	4.8821	3.1126
	14.0048	4.878	3.0223
	14.0398	4.8799	3.0211
	14.0748	4.873	3.2099
	14.1088	4.8861	2.5749
	14.1438	4.8791	2.8409
	14.1778	4.8844	2.5366
	14.2128	4.8832	2.3895
	14.2478	4.8742	2.1845
	14.2818	4.8871	2.2243
	14.3168	4.8844	2.0755
	14.3518	4.8839	2.3119
	14.3868	4.8764	2.4458
	14.4228	4.8865	2.3543
	14.4578	4.8911	2.6232
	14.4928	4.8909	2.8176
	14.5278	4.8957	2.8671
	14.5628	4.8867	3.0255
	14.5978	4.8904	3.3923
	14.6318	4.8957	3.5459
	14.6668	4.8928	3.2876
	14.7018	4.8834	3.8786
	14.7368	4.8744	3.7324
	14.7718	4.8717	3.7119
	14.8078	4.8762	3.4719
	14.8418	4.8848	3.1892
	14.8768	4.8719	3.1249
	14.9118	4.8668	3.2262
	14.9468	4.8744	3.0652
	14.9818	4.8874	2.6055
	15.0168	4.8856	2.8207
	15.0518	4.8906	2.3631
	15.0868	4.8865	2.586
	15.1218	4.8826	2.9915
	15.1568	4.8921	3.0977
	15.1908	4.8875	3.128
	15.2248	4.8865	3.4488
	15.2588	4.8897	3.2571
	15.2938	4.8944	3.4515
	15.3288	4.8899	3.6171
	15.3639	4.8911	3.4601
	15.3989	4.888	3.4699
	15.4329	4.8925	3.7536
	15.4679	4.8779	3.6665
	15.5029	4.8734	3.7214
	15.5379	4.874	3.6391
	15.5729	4.8715	3.8392
	15.6079	4.8744	3.5211
	15.6429	4.869	3.6976
	15.6769	4.8709	3.3245
	15.7119	4.8583	3.6747
	15.7469	4.8489	3.7114
	15.7819	4.8565	3.5296
	15.8179	4.8559	3.4667
	15.8529	4.8591	3.2534
	15.8879	4.8586	3.2511
	15.9219	4.8571	3.2758
	15.9569	4.8604	2.9808
	15.9919	4.861	2.9694
	16.0269	4.8682	2.816
	16.0619	4.8608	2.7166
	16.0969	4.8629	2.5542
	16.1319	4.8695	2.4382
	16.1679	4.8777	2.2942
	16.2019	4.8774	2.6071
	16.2369	4.8713	2.8057
	16.2719	4.8807	2.5018
	16.3069	4.8702	3.0714
	16.3419	4.8761	2.9493
	16.3769	4.8773	2.7899
	16.4119	4.8761	2.8592
	16.4469	4.8743	2.8446
	16.4829	4.8809	2.7053
	16.5179	4.8827	2.7067
	16.5519	4.8727	2.9847
	16.5869	4.8778	2.8116
	16.6219	4.8791	2.9505
	16.6569	4.8741	2.8364
	16.6919	4.8702	3.0463
	16.7259	4.8721	2.9056
	16.7609	4.8634	3.1269
	16.7949	4.8719	2.6931
	16.8299	4.8801	2.5468
	16.8659	4.8867	2.3086
	16.9009	4.8819	2.7489
	16.9349	4.88	2.6732
	16.9699	4.8834	2.7794
	17.0039	4.884	2.7096
	17.0389	4.8896	2.4964
	17.0739	4.8784	2.9602
	17.109	4.8711	3.0388
	17.144	4.8778	2.975
	17.179	4.8743	3.1701
	17.215	4.8809	2.8434
	17.249	4.879	3.0298
	17.284	4.8826	2.8755
	17.319	4.8831	3.0767
	17.354	4.8815	3.1961
	17.389	4.8842	2.8672
	17.423	4.89	2.9512
	17.458	4.8794	3.181
	17.492	4.8805	3.1382
	17.527	4.8857	2.8147
	17.562	4.8817	2.9641
	17.597	4.8841	2.8945
	17.632	4.8871	2.6694
	17.667	4.8864	2.8735
	17.702	4.8887	2.9284
	17.737	4.8847	3.0192
	17.771	4.8861	2.9266
	17.806	4.8892	2.6554
	17.841	4.8831	2.5324
	17.876	4.8795	2.4804
	17.911	4.8944	1.886
	17.947	4.8926	2.363
	17.981	4.9034	2.1441
	18.016	4.8938	2.6163
	18.051	4.8951	2.6867
	18.086	4.8937	2.9206
	18.121	4.8892	3.1788
	18.155	4.8945	3.1231
	18.19	4.8866	3.1952
	18.225	4.8999	3.0835
	18.261	4.8954	3.1656
	18.296	4.9031	3.022
	18.331	4.8992	3.0167
	18.366	4.8969	3.0589
	18.401	4.893	3.3119
	18.436	4.8971	3.2273
	18.471	4.8993	3.2872
	18.506	4.8975	3.2428
	18.541	4.901	3.2146
	18.576	4.8992	3.3145
	18.611	4.9034	3.0534
	18.646	4.9048	2.9914
	18.681	4.9007	3.2584
	18.716	4.9034	2.9532
	18.751	4.9027	3.3213
	18.786	4.902	2.7663
	18.821	4.907	2.9111
	18.8561	4.906	3.1819
	18.8911	4.9056	3.3182
	18.9261	4.9143	3.253
	18.9611	4.9116	3.167
	18.9961	4.9119	3.1959
	19.0311	4.8973	3.4166
	19.0661	4.9123	3.0564
	19.1011	4.9071	3.0431
	19.1361	4.9127	3.0643
	19.1711	4.9143	2.7939
	19.2061	4.9041	2.8593
	19.2401	4.9134	3.1104
	19.2751	4.9065	3.2263
	19.3101	4.9045	3.2361
	19.3461	4.8994	3.0908
	19.3801	4.8973	3.049
	19.4151	4.9105	2.4552
	19.4501	4.9075	2.7272
	19.4851	4.9088	2.7896
	19.5201	4.9058	2.7776
	19.5551	4.906	2.7609
	19.5911	4.8965	2.957
	19.6261	4.8981	2.9502
	19.6611	4.8994	3.0392
	19.6961	4.9075	2.7807
	19.7311	4.9109	2.647
	19.7661	4.9055	3.027
	19.8011	4.9158	2.7062
	19.8361	4.9127	3.1285
	19.8711	4.9041	3.0899
	19.9051	4.8932	3.3929
	19.9411	4.9004	3.3066
	19.9761	4.9081	3.0284
	20.0101	4.9071	2.9922
	20.0451	4.9123	3.1391
	20.0801	4.9075	3.0425
	20.1151	4.9127	2.7954
	20.1491	4.9153	2.8886
	20.1841	4.9184	2.4339
	20.2191	4.9098	2.817
	20.2531	4.9153	2.5134
	20.2881	4.9176	2.4694
	20.3231	4.9238	2.5015
	20.3581	4.9315	2.2984
	20.3931	4.9295	2.4498
	20.4281	4.9298	2.5241
	20.4631	4.9265	2.5876
	20.4971	4.9269	2.4186
	20.5321	4.932	2.3315
	20.5671	4.9305	2.7482
	20.6022	4.9342	2.4602
	20.6372	4.9282	2.5059
	20.6722	4.9334	2.5632
	20.7082	4.9431	2.4828
	20.7432	4.9425	2.5075
	20.7782	4.9334	2.7452
	20.8132	4.9393	2.7936
	20.8472	4.9306	3.0892
	20.8812	4.9277	3.3367
	20.9162	4.9218	3.3947
	20.9512	4.9251	3.4273
	20.9852	4.9252	3.4031
	21.0212	4.924	3.4231
	21.0562	4.9334	3.5227
	21.0912	4.9191	3.5877
	21.1262	4.9169	3.4115
	21.1602	4.9186	3.4178
	21.1942	4.9248	3.0541
	21.2282	4.9274	3.3673
	21.2632	4.9179	3.3819
	21.2972	4.9158	3.402
	21.3322	4.9017	3.6804
	21.3672	4.8921	3.5696
	21.4022	4.902	3.3755
	21.4372	4.9025	3.5625
	21.4722	4.9053	3.0285
	21.5082	4.9068	3.1246
	21.5432	4.9089	3.1063
	21.5782	4.9032	3.3713
	21.6132	4.8945	2.988
	21.6482	4.9053	2.8153
	21.6822	4.9047	2.8224
	21.7172	4.9007	3.0198
	21.7522	4.8958	2.8849
	21.7872	4.9033	2.9073
	21.8212	4.8978	2.8199
	21.8562	4.8908	3.1036
	21.8912	4.905	2.8976
	21.9262	4.9042	2.9219
	21.9612	4.8967	2.998
	21.9952	4.8948	3.1845
	22.0292	4.889	3.2791
	22.0642	4.8952	3.1833
	22.0992	4.8858	3.3578
	22.1352	4.8886	3.3726
	22.1702	4.8938	2.9724
	22.2052	4.8915	3.2944
	22.2402	4.8872	3.2105
	22.2752	4.8944	2.8077
	22.3102	4.8908	3.0604
	22.3453	4.904	2.724
	22.3803	4.9043	2.8421
	22.4153	4.904	2.7782
	22.4513	4.9039	2.7542
	22.4863	4.9	3.0034
	22.5213	4.9125	2.5631
	22.5563	4.9154	2.9149
	22.5913	4.9173	2.9696
	22.6263	4.9142	3.0182
	22.6613	4.9051	3.1155
	22.6963	4.8906	2.9873
	22.7313	4.9016	2.7341
	22.7663	4.9063	2.5695
	22.8023	4.9017	2.7445
	22.8373	4.9111	2.57
	22.8723	4.907	2.8006
	22.9073	4.9123	2.6281
	22.9413	4.9071	2.769
	22.9763	4.9095	2.6431
	23.0113	4.9016	2.9861
	23.0463	4.9009	2.8124
	23.0813	4.9097	2.6327
	23.1163	4.9093	2.7895
	23.1513	4.918	2.8929
	23.1863	4.9217	2.9607
	23.2213	4.9216	2.704
	23.2563	4.915	2.8665
	23.2913	4.9244	3.085
	23.3263	4.9099	3.1488
	23.3613	4.9218	3.0374
	23.3973	4.9225	2.7814
	23.4333	4.9303	2.5292
	23.4683	4.9219	2.8964
	23.5033	4.9221	2.9704
	23.5383	4.9324	3.0902
	23.5733	4.9274	3.2042
	23.6083	4.9187	3.5046
	23.6433	4.9136	3.4877
	23.6783	4.9136	3.1787
	23.7133	4.9194	3.12
	23.7483	4.9206	3.1705
	23.7833	4.9087	3.1558
	23.8183	4.9157	2.8362
	23.8533	4.9136	3.042
	23.8873	4.9186	2.7094
	23.9223	4.9259	2.4977
	23.9573	4.9241	2.8687
	23.9913	4.9223	2.513
	24.0263	4.9111	2.954
	24.0613	4.9125	2.6652
	24.0964	4.9152	2.6185
	24.1324	4.9228	2.6429
	24.1674	4.9163	2.9515
	24.2024	4.9227	2.8965
	24.2374	4.9158	3.0155
	24.2714	4.9074	3.5751
	24.3064	4.9142	3.2007
	24.3414	4.9154	3.1786
	24.3764	4.9111	3.2411
	24.4114	4.901	3.4903
	24.4464	4.8999	3.3815
	24.4814	4.9052	3.27
	24.5174	4.9072	3.2732
	24.5524	4.8964	3.2679
	24.5874	4.9064	3.0386
	24.6224	4.9006	3.1605
	24.6574	4.9125	3.136
	24.6924	4.8985	3.1163
	24.7274	4.8941	3.3996
	24.7634	4.904	3.3738
	24.7974	4.9033	3.0787
	24.8324	4.8991	3.405
	24.8664	4.8973	3.2324
	24.9014	4.9007	3.0129
	24.9354	4.9006	2.8511
	24.9704	4.8971	3.0507
	25.0054	4.8941	2.8539
	25.0394	4.899	2.6851
	25.0744	4.8876	2.7743
	25.1094	4.8977	2.4762
	25.1454	4.8934	2.4351
	25.1794	4.8926	2.5907
	25.2144	4.8864	2.6645
	25.2494	4.888	2.821
	25.2844	4.8957	2.8303
	25.3184	4.8936	2.9205
	25.3534	4.8923	2.9544
	25.3874	4.8909	3.1971
	25.4224	4.8892	3.205
	25.4574	4.8891	3.0631
	25.4934	4.883	3.4366
	25.5284	4.8947	3.3648
	25.5634	4.8954	3.3314
	25.5984	4.8955	3.1935
	25.6334	4.8953	3.0076
	25.6684	4.8963	3.1046
	25.7034	4.8914	3.2424
	25.7384	4.8957	2.9152
	25.7734	4.8945	2.5967
	25.8094	4.8921	2.9557
	25.8445	4.8887	2.7475
	25.8795	4.8998	2.8466
	25.9145	4.8888	2.8496
	25.9495	4.8986	3.0477
	25.9845	4.9003	2.8463
	26.0185	4.8971	3.0012
	26.0535	4.9019	3.195
	26.0885	4.9062	3.0671
	26.1235	4.9007	3.556
	26.1585	4.8998	3.4622
	26.1935	4.9003	3.4067
	26.2285	4.898	3.5646
	26.2635	4.9007	3.4482
	26.2985	4.8949	3.3698
	26.3335	4.8967	3.4019
	26.3685	4.8991	3.1495
	26.4035	4.8877	3.4488
	26.4385	4.8859	3.2714
	26.4725	4.882	3.2838
	26.5075	4.8823	3.2088
	26.5425	4.878	3.2403
	26.5785	4.8814	3.0891
	26.6125	4.8774	3.1402
	26.6475	4.8752	3.069
	26.6825	4.8762	3.1112
	26.7175	4.8708	3.0363
	26.7525	4.8841	2.8588
	26.7875	4.8809	3.1012
	26.8225	4.881	3.0267
	26.8585	4.8914	2.6366
	26.8925	4.8877	2.88
	26.9275	4.8843	2.9894
	26.9625	4.8893	3.0181
	26.9975	4.8961	2.5798
	27.0325	4.8897	2.7565
	27.0675	4.8871	2.809
	27.1025	4.8951	2.7731
	27.1375	4.8969	2.7794
	27.1725	4.8921	2.9374
	27.2075	4.8978	2.5968
	27.2425	4.8992	2.8369
	27.2775	4.9014	2.5857
	27.3115	4.8923	2.9561
	27.3465	4.8858	3.0726
	27.3815	4.8889	3.2689
	27.4165	4.8815	3.3503
	27.4515	4.8777	3.2147
	27.4865	4.8738	3.1547
	27.5215	4.8828	3.0659
	27.5565	4.8889	3.1688
	27.5916	4.8823	3.155
	27.6266	4.8868	2.9452
	27.6616	4.8891	2.7786
	27.6956	4.877	3.0781
	27.7306	4.8724	3.3794
	27.7666	4.8725	3.2674
	27.8006	4.867	3.5553
	27.8356	4.8797	2.9692
	27.8706	4.871	3.41
	27.9056	4.8637	3.6054
	27.9406	4.8736	3.1955
	27.9756	4.8749	3.4562
	28.0106	4.8654	3.6801
	28.0456	4.8646	3.694
	28.0806	4.8615	3.6384
	28.1146	4.8753	3.0595
	28.1496	4.8506	3.7971
	28.1846	4.8614	3.438
	28.2196	4.8563	3.0839
	28.2546	4.8552	3.0456
	28.2896	4.8589	2.8105
	28.3246	4.8583	2.8837
	28.3596	4.852	3.0541
	28.3946	4.8563	3.0525
	28.4296	4.8582	2.9199
	28.4646	4.8616	2.9862
	28.4996	4.8623	2.8483
	28.5346	4.8587	3.2134
	28.5706	4.8628	3.0543
	28.6046	4.8627	2.9468
	28.6386	4.8564	3.3248
	28.6736	4.8596	2.9918
	28.7086	4.8563	3.1987
	28.7436	4.8541	3.1095
	28.7786	4.85	3.1163
	28.8126	4.8487	3.1954
	28.8476	4.8633	2.7985
	28.8826	4.8573	3.1257
	28.9176	4.8618	2.7831
	28.9526	4.8653	2.9134
	28.9876	4.8589	3.1195
	29.0226	4.8585	2.9262
	29.0576	4.861	3.147
	29.0926	4.8622	2.9696
	29.1276	4.8703	3.0497
	29.1626	4.8623	2.9635
	29.1976	4.8635	2.8902
	29.2326	4.8632	3.0688
	29.2676	4.8671	2.5146
	29.3026	4.8641	2.7381
	29.3377	4.8568	2.6063
	29.3727	4.8673	2.7219
	29.4077	4.8663	2.6876
	29.4417	4.8799	2.3591
	29.4767	4.8744	2.6247
	29.5117	4.8697	2.603
	29.5467	4.8885	2.395
	29.5807	4.8948	2.3448
	29.6157	4.8972	2.3342
	29.6517	4.8911	2.4658
	29.6867	4.8954	2.5083
	29.7217	4.8935	2.6898
	29.7557	4.9008	2.5107
	29.7907	4.9003	2.7447
	29.8257	4.9011	2.8273
	29.8607	4.907	2.8459
	29.8957	4.9085	2.8941
	29.9307	4.9024	2.7898
	29.9647	4.9073	2.8844
	29.9997	4.9049	2.9304
	30.0337	4.893	3.1607
	30.0687	4.8943	3.0991
	30.1037	4.8985	3.0436
	30.1387	4.9006	2.9116
	30.1727	4.906	2.9105
	30.2077	4.9109	2.746
	30.2427	4.9038	3.0791
	30.2777	4.8999	3.0583
	30.3127	4.9003	3.4319
	30.3477	4.9094	2.9621
	30.3827	4.9171	2.8076
	30.4177	4.9149	2.9333
	30.4527	4.9169	2.9859
	30.4877	4.9131	3.2877
	30.5227	4.9143	3.2745
	30.5567	4.9244	3.2581
	30.5917	4.9132	3.2639
	30.6267	4.9176	3.1033
	30.6617	4.9167	3.1882
	30.6967	4.9139	3.0008
	30.7327	4.9113	3.056
	30.7667	4.9192	2.8837
	30.8017	4.9089	3.1039
	30.8367	4.9032	2.8268
	30.8717	4.9033	3.1847
	30.9067	4.8991	3.1642
	30.9417	4.9008	2.997
	30.9767	4.9091	2.7936
	31.0117	4.907	2.9574
	31.0477	4.914	2.5975
	31.0838	4.9119	2.6872
	31.1188	4.9103	2.3938
	31.1538	4.9089	2.7765
	31.1888	4.9119	2.6579
	31.2228	4.9209	2.8502
	31.2578	4.913	2.8867
	31.2928	4.8952	3.0911
	31.3278	4.9036	2.8884
	31.3638	4.9183	2.6753
	31.3988	4.918	2.6617
	31.4338	4.9231	2.967
	31.4688	4.9178	2.8224
	31.5038	4.9227	2.8202
	31.5388	4.92	2.9018
	31.5738	4.9271	3.0441
	31.6078	4.9215	3.2361
	31.6418	4.9149	3.113
	31.6768	4.9171	2.8265
	31.7118	4.9257	2.5761
	31.7468	4.9184	2.7231
	31.7808	4.9183	2.882
	31.8158	4.9185	2.6159
	31.8508	4.9231	2.6667
	31.8858	4.9281	2.785
	31.9208	4.9202	3.2534
	31.9558	4.9206	3.2636
	31.9898	4.9224	2.9727
	32.0248	4.9287	3.1241
	32.0598	4.933	3.2014
	32.0938	4.9201	3.3086
	32.1298	4.914	3.1585
	32.1648	4.9198	3.1817
	32.1998	4.9208	2.9803
	32.2348	4.9212	2.8648
	32.2698	4.9165	3.2528
	32.3038	4.9252	3.0446
	32.3388	4.9115	3.2944
	32.3728	4.9147	2.8507
	32.4068	4.9069	3.4402
	32.4408	4.9065	3.5059
	32.4768	4.9051	3.4858
	32.5118	4.9101	3.443
	32.5458	4.9049	3.4055
	32.5808	4.8999	3.4472
	32.6148	4.8988	3.4615
	32.6498	4.9046	3.9742
	32.6838	4.8939	3.4108
	32.7178	4.8983	3.2669
	32.7518	4.9008	3.0451
	32.7868	4.8994	2.8746
	32.8218	4.8912	3.3218
	32.8569	4.8984	3.0302
	32.8919	4.8784	3.5064
	32.9269	4.8945	3.3074
	32.9629	4.886	3.5692
	32.9969	4.8826	3.5428
	33.0309	4.8931	3.356
	33.0659	4.8843	3.5738
	33.0999	4.8797	3.4815
	33.1349	4.8755	3.381
	33.1699	4.8792	3.0895
	33.2049	4.8711	3.0063
	33.2399	4.8716	2.9698
	33.2749	4.8738	2.9832
	33.3099	4.8675	3.0511
	33.3449	4.8794	2.6949
	33.3789	4.8727	2.9648
	33.4139	4.8772	3.1308
	33.4489	4.8737	3.0384
	33.4839	4.8715	2.9866
	33.5189	4.8718	2.9184
	33.5539	4.8635	3.2632
	33.5879	4.8701	3.1641
	33.6219	4.8675	3.3224
	33.6579	4.8795	2.8871
	33.6929	4.879	2.7665
	33.7279	4.8718	2.8172
	33.7629	4.8743	2.9233
	33.7979	4.8776	2.723
	33.8329	4.8792	2.8363
	33.8679	4.8853	2.5409
	33.9029	4.8826	2.6627
	33.9379	4.8862	2.6676
	33.9739	4.8868	2.5832
	34.0089	4.8873	2.3719
	34.0439	4.8924	2.6807
	34.0789	4.8845	2.7011
	34.1139	4.8866	2.5827
	34.1489	4.8844	2.9111
	34.1839	4.8875	2.6739
	34.2189	4.8919	2.7158
	34.2539	4.8859	2.6138
	34.2899	4.8828	2.7926
	34.3239	4.8769	3.0833
	34.3589	4.8889	3.0054
	34.3939	4.8864	2.8264
	34.4279	4.8777	3.2152
	34.4629	4.878	3.2273
	34.4979	4.8766	3.162
	34.5329	4.8762	3.0108
	34.5679	4.8788	3.303
	34.603	4.8814	3.2753
	34.638	4.8721	3.5123
	34.673	4.8802	3.3111
	34.708	4.8787	3.1775
	34.743	4.8816	3.4424
	34.778	4.874	3.5729
	34.813	4.8675	3.4473
	34.848	4.8588	3.4661
	34.883	4.8584	3.4718
	34.918	4.8655	3.0827
	34.953	4.8572	3.0303
	34.988	4.8633	2.7191
	35.023	4.8581	2.9694
	35.058	4.8471	3.2135
	35.093	4.8504	3.0748
	35.127	4.853	3.0581
	35.162	4.8441	3.1869
	35.197	4.8491	2.8096
	35.231	4.8482	2.9729
	35.266	4.8439	3.0121
	35.3	4.8342	3.2654
	35.335	4.8274	3.4639
	35.371	4.8435	2.9226
	35.406	4.8464	2.8878
	35.441	4.8433	2.7879
	35.476	4.8391	2.8375
	35.51	4.8454	2.7439
	35.545	4.8415	2.7158
	35.579	4.8359	2.8977
	35.613	4.8305	2.7096
	35.648	4.8406	2.669
	35.682	4.8399	2.7235
	35.717	4.8453	2.7472
	35.753	4.849	2.6019
	35.788	4.8472	2.5845
	35.823	4.841	2.8922
	35.858	4.8578	2.1269
	35.892	4.8615	1.8372
	35.927	4.8615	1.9098
	35.962	4.8618	2.2776
	35.997	4.86	2.7633
	36.032	4.8711	3.0416
	36.068	4.8682	3.0553
	36.103	4.8701	3.4542
	36.138	4.8656	3.6777
	36.172	4.8662	3.4891
	36.207	4.8694	3.5264
	36.242	4.8574	3.8533
	36.277	4.8631	3.3706
	36.311	4.8768	3.0013
	36.3451	4.8767	3.0018
	36.3801	4.8758	2.7848
	36.4151	4.8772	2.6315
	36.4491	4.8751	2.4901
	36.4851	4.8743	2.4213
	36.5201	4.8784	2.2815
	36.5551	4.8812	2.4232
	36.5901	4.877	2.2854
	36.6251	4.8809	2.1248
	36.6601	4.8944	2.1724
	36.6941	4.8911	2.3635
	36.7291	4.8851	2.8115
	36.7641	4.8934	2.8295
	36.8001	4.8972	2.88
	36.8351	4.8968	3.1264
	36.8701	4.8937	3.1449
	36.9051	4.8975	3.1651
	36.9401	4.8954	3.1226
	36.9751	4.9014	2.896
	37.0101	4.903	2.8947
	37.0451	4.9023	3.08
	37.0801	4.8985	3.1428
	37.1151	4.8967	3.0512
	37.1501	4.9027	3.2524
	37.1841	4.8991	3.5181
	37.2181	4.9063	3.0666
	37.2531	4.9014	3.3686
	37.2881	4.9021	3.1932
	37.3231	4.9092	3.0071
	37.3581	4.8936	3.4499
	37.3931	4.9025	3.1407
	37.4281	4.9049	3.028
	37.4631	4.9062	3.0459
	37.4981	4.9042	3.0139
	37.5331	4.9004	2.9115
	37.5671	4.9075	2.6222
	37.6021	4.8981	3.0159
	37.6361	4.8987	2.71
	37.6711	4.8953	2.8239
	37.7061	4.8947	3.0101
	37.7411	4.9034	2.9719
	37.7761	4.9018	3.293
	37.8111	4.8995	3.2629
	37.8461	4.8953	3.3952
	37.8811	4.8881	3.7599
	37.9161	4.8927	3.5652
	37.9501	4.8874	3.4745
	37.9851	4.8908	3.6194
	38.0201	4.8813	3.7687
	38.0551	4.8792	3.334
	38.0902	4.8782	2.8557
	38.1252	4.881	2.356
	38.1602	4.879	2.1482
	38.1952	4.8872	2.0537
	38.2302	4.888	2.3112
	38.2652	4.892	2.5945
	38.3012	4.8981	2.505
	38.3362	4.8986	2.7358
	38.3712	4.9023	2.6234
	38.4062	4.9049	2.709
	38.4412	4.9021	2.7169
	38.4762	4.8965	3.0197
	38.5112	4.8933	3.084
	38.5462	4.9001	2.9906
	38.5812	4.8958	3.162
	38.6162	4.8997	3.2694
	38.6512	4.9063	3.1402
	38.6862	4.9063	3.1552
	38.7212	4.9032	3.5698
	38.7562	4.8963	3.6069
	38.7902	4.8958	3.3471
	38.8252	4.8861	3.8501
	38.8612	4.8823	3.6095
	38.8962	4.8864	3.4373
	38.9312	4.884	3.7612
	38.9662	4.8855	3.4409
	39.0012	4.8795	3.3165
	39.0362	4.8767	3.5318
	39.0712	4.8739	3.5804
	39.1062	4.8705	3.8054
	39.1412	4.874	3.6173
	39.1762	4.8721	3.4289
	39.2122	4.8712	3.3572
	39.2462	4.8739	3.2228
	39.2812	4.8682	3.3467
	39.3162	4.8693	3.1917
	39.3512	4.8665	3.0857
	39.3862	4.8725	2.7259
	39.4212	4.8671	2.7186
	39.4562	4.8811	2.2102
	39.4912	4.8863	2.1283
	39.5252	4.8793	2.4465
	39.5602	4.8788	2.4648
	39.5952	4.8843	2.3484
	39.6302	4.879	2.5983
	39.6652	4.8808	2.7367
	39.7002	4.8799	2.4755
	39.7342	4.891	2.265
	39.7692	4.892	2.2609
	39.8042	4.8969	2.3631
	39.8393	4.9067	2.5808
	39.8743	4.907	2.6391
	39.9093	4.8991	2.989
	39.9443	4.9034	2.9495
	39.9793	4.8973	3.1764
	40.0143	4.907	2.9309
	40.0493	4.913	2.6883
	40.0843	4.9027	2.9819
	40.1193	4.9047	2.9323
	40.1543	4.9065	2.8133
	40.1893	4.9086	2.9227
	40.2243	4.912	2.6655
	40.2593	4.9144	2.6603
	40.2953	4.9088	2.8295
	40.3303	4.907	2.9418
	40.3653	4.9078	3.2845
	40.4003	4.9085	3.1241
	40.4353	4.911	2.9251
	40.4703	4.915	2.8081
	40.5053	4.9097	2.7133
	40.5403	4.9091	2.8928
	40.5753	4.905	2.9151
	40.6103	4.9098	3.1433
	40.6453	4.9068	3.1718
	40.6803	4.9101	3.0102
	40.7153	4.902	3.1845
	40.7503	4.9	3.036
	40.7853	4.9038	3.044
	40.8203	4.8925	3.3138
	40.8553	4.8956	3.1898
	40.8913	4.8964	3.1565
	40.9253	4.8942	2.875
	40.9603	4.9026	2.9909
	40.9953	4.9043	2.9511
	41.0303	4.9067	2.7229
	41.0653	4.9053	2.6559
	41.1003	4.9042	2.9023
	41.1353	4.9136	2.5685
	41.1703	4.8991	3.1458
	41.2063	4.9072	2.8379
	41.2413	4.9082	2.751
	41.2763	4.9114	2.889
	41.3113	4.9058	3.0184
	41.3463	4.9109	2.9033
	41.3813	4.9059	3.1727
	41.4163	4.9028	3.1456
	41.4503	4.8989	3.2106
	41.4843	4.9075	3.2018
	41.5193	4.9041	3.146
	41.5543	4.9014	3.323
	41.5894	4.8993	3.5893
	41.6244	4.9051	3.2724
	41.6594	4.9047	3.0814
	41.6944	4.9054	2.9264
	41.7294	4.9107	2.8835
	41.7644	4.9126	2.7703
	41.7994	4.9091	3.0036
	41.8344	4.9167	2.6584
	41.8704	4.918	2.6778
	41.9054	4.921	2.4713
	41.9404	4.9161	2.844
	41.9754	4.9205	2.9001
	42.0104	4.9192	2.9548
	42.0454	4.9132	3.0213
	42.0804	4.9251	2.7353
	42.1154	4.9238	2.5941
	42.1504	4.9301	2.6528
	42.1854	4.9276	2.7524
	42.2204	4.933	2.602
	42.2554	4.9319	2.6098
	42.2904	4.9324	2.3816
	42.3254	4.9414	2.2426
	42.3604	4.9435	2.2363
	42.3944	4.939	2.1648
	42.4294	4.9344	2.372
	42.4644	4.942	2.2936
	42.4994	4.9493	2.1543
	42.5344	4.9481	2.3888
	42.5694	4.9577	2.5777
	42.6044	4.9492	2.6161
	42.6394	4.9624	2.6983
	42.6744	4.956	2.8522
	42.7094	4.9523	2.9731
	42.7444	4.9465	3.2733
	42.7784	4.9493	3.1768
	42.8134	4.9517	3.26
	42.8484	4.9622	3.33
	42.8834	4.944	3.3684
	42.9184	4.948	3.345
	42.9534	4.9467	3.36
	42.9884	4.9431	3.518
	43.0234	4.9426	3.3617
	43.0584	4.9466	3.1354
	43.0934	4.9564	3.0723
	43.1284	4.9378	3.5287
	43.1634	4.9367	3.5076
	43.1984	4.9372	3.2916
	43.2344	4.9409	2.8322
	43.2694	4.93	3.305
	43.3044	4.9365	3.2704
	43.3395	4.9361	3.1519
	43.3735	4.94	3.2598
	43.4085	4.9329	3.3456
	43.4435	4.9367	2.9529
	43.4785	4.9266	3.3842
	43.5135	4.9192	3.6005
	43.5495	4.9217	3.6114
	43.5845	4.9268	3.614
	43.6195	4.9208	3.6429
	43.6545	4.9257	3.51
	43.6885	4.9258	3.3168
	43.7235	4.9343	2.8247
	43.7585	4.9364	3.1388
	43.7935	4.9264	3.2193
	43.8285	4.9281	2.7952
	43.8625	4.9319	3.1524
	43.8975	4.9234	3.2872
	43.9335	4.9087	3.3785
	43.9675	4.9161	3.1822
	44.0025	4.9246	2.9392
	44.0375	4.9261	3.0253
	44.0725	4.9151	3.1781
	44.1075	4.9182	2.7761
	44.1415	4.9184	2.8586
	44.1765	4.9112	2.8221
	44.2115	4.9111	2.9953
	44.2455	4.9221	2.4604
	44.2815	4.9222	2.4859
	44.3155	4.9249	2.5048
	44.3505	4.9285	2.5663
	44.3855	4.9327	2.4498
	44.4205	4.9265	2.8409
	44.4555	4.9307	2.57
	44.4905	4.9337	2.5962
	44.5255	4.9337	2.6077
	44.5605	4.9348	2.664
	44.5955	4.9284	2.7422
	44.6315	4.9395	2.5248
	44.6645	4.936	2.8524
	44.6995	4.9441	2.73
	44.7335	4.9425	2.853
	44.7685	4.95	2.8575
	44.8035	4.9495	2.7914
	44.8375	4.9454	2.8965
	44.8715	4.9399	3.0679
	44.9065	4.9429	2.9379
	44.9415	4.9369	3.3242
	44.9765	4.9359	3.3785
	45.0115	4.9389	3.7575
	45.0465	4.9344	3.6666
	45.0806	4.9369	3.7255
	45.1156	4.9087	4.1436
	45.1506	4.9152	3.6984
	45.1856	4.923	3.2729
	45.2206	4.9196	3.2742
	45.2556	4.9332	3.1323
	45.2906	4.9246	3.3786
	45.3256	4.9343	2.8961
	45.3606	4.9337	2.7616
	45.3956	4.9399	3.0173
	45.4326	4.9388	2.7869
	45.4676	4.9414	2.8397
	45.5026	4.9339	3.0391
	45.5366	4.9387	2.961
	45.5706	4.9324	2.828
	45.6046	4.9381	2.6754
	45.6396	4.9325	2.6113
	45.6746	4.9311	2.4395
	45.7096	4.9306	2.3802
	45.7446	4.9155	2.7221
	45.7796	4.9353	2.2553
	45.8156	4.9448	2.2117
	45.8506	4.9394	2.4095
	45.8856	4.9463	2.3755
	45.9206	4.9382	2.5846
	45.9556	4.95	2.5782
	45.9906	4.9436	2.8395
	46.0256	4.9458	2.7804
	46.0606	4.9447	3.1338
	46.0946	4.9411	3.4976
	46.1296	4.9299	3.6758
	46.1646	4.9333	3.6859
	46.1996	4.9351	3.4071
	46.2346	4.9309	3.6503
	46.2696	4.9322	3.5573
	46.3046	4.9318	3.3159
	46.3396	4.9262	3.5781
	46.3746	4.9317	3.2604
	46.4106	4.9157	3.556
	46.4456	4.924	3.2593
	46.4806	4.9208	3.0924
	46.5156	4.9171	3.2405
	46.5506	4.9182	3.1353
	46.5856	4.9194	2.9933
	46.6206	4.9139	3.3157
	46.6556	4.9165	3.0597
	46.6906	4.9165	3.0456
	46.7246	4.9211	3.1054
	46.7606	4.9149	3.4215
	46.7956	4.9084	3.5176
	46.8307	4.9157	3.4912
	46.8647	4.9103	3.4209
	46.8997	4.9126	3.4472
	46.9347	4.9114	3.4438
	46.9697	4.9041	3.4846
	47.0037	4.9	3.6184
	47.0387	4.8988	3.7192
	47.0737	4.8983	3.5199
	47.1097	4.8976	3.351
	47.1447	4.8993	2.8254
	47.1797	4.9085	2.8669
	47.2147	4.9116	3.0235
	47.2497	4.9082	3.0714
	47.2847	4.9026	2.9479
	47.3187	4.9002	3.0472
	47.3537	4.8967	2.935
	47.3887	4.8947	3.0348
	47.4237	4.8988	2.9624
	47.4587	4.9046	2.9355
	47.4947	4.9014	2.9792
	47.5287	4.8977	2.6423
	47.5637	4.8992	2.8799
	47.5987	4.9102	2.7365
	47.6337	4.8983	2.9588
	47.6687	4.8954	2.7462
	47.7037	4.9058	2.5243
	47.7387	4.8984	2.9141
	47.7737	4.8958	2.8188
	47.8077	4.8992	2.7938
	47.8437	4.9014	2.8502
	47.8777	4.901	2.9579
	47.9117	4.898	3.2623
	47.9467	4.8985	2.9429
	47.9817	4.8963	3.1413
	48.0167	4.8874	3.1482
	48.0507	4.8911	3.1484
	48.0847	4.8979	3.1135
	48.1197	4.9038	2.7607
	48.1537	4.9001	2.9396
	48.1897	4.8983	2.7875
	48.2247	4.899	2.9231
	48.2597	4.901	2.9265
	48.2947	4.8991	2.9656
	48.3297	4.9	2.9603
	48.3647	4.8968	2.8095
	48.3997	4.8812	3.3023
	48.4357	4.8917	2.8678
	48.4697	4.893	2.8747
	48.5057	4.8877	3.0645
	48.5407	4.8858	3.3222
	48.5758	4.8935	3.0882
	48.6098	4.8991	3.2434
	48.6448	4.8828	3.8408
	48.6788	4.8835	3.5014
	48.7138	4.8863	3.3575
	48.7478	4.881	3.3195
	48.7828	4.8938	2.9794
	48.8178	4.8874	2.9294
	48.8528	4.8847	2.993
	48.8878	4.8806	2.8783
	48.9228	4.882	2.9921
	48.9578	4.8861	2.8743
	48.9928	4.8882	3.021
	49.0268	4.8803	3.3169
	49.0618	4.8858	3.0279
	49.0958	4.8843	3.1822
	49.1308	4.8755	3.2877
	49.1658	4.8838	3.1823
	49.2008	4.884	3.0297
	49.2368	4.8859	3.1118
	49.2718	4.8819	3.2453
	49.3078	4.8882	2.9665
	49.3418	4.8855	3.1677
	49.3768	4.8835	2.9211
	49.4108	4.8923	2.6535
	49.4458	4.8946	2.7997
	49.4808	4.8987	2.5802
	49.5158	4.8903	2.5909
	49.5498	4.8911	2.7308
	49.5858	4.8939	2.5957
	49.6208	4.8938	2.5493
	49.6558	4.8929	2.6391
	49.6908	4.8906	2.7166
	49.7258	4.8946	2.7498
	49.7608	4.8965	2.6864
	49.7958	4.8974	2.977
	49.8308	4.9044	2.7529
	49.8658	4.8946	3.0153
	49.9008	4.9007	3.1457
	49.9358	4.9101	2.7398
	49.9708	4.8974	3.1227
	50.0058	4.9064	3.1115
	50.0408	4.9	3.2649
	50.0748	4.8991	3.2367
	50.1098	4.9049	3.1465
	50.1438	4.9102	3.0728
	50.1788	4.9075	2.936
	50.2138	4.8979	3.1363
	50.2488	4.9004	3.0088
	50.2838	4.9014	2.9732
	50.3189	4.901	2.8355
	50.3529	4.9033	2.5803
	50.3909	4.8988	2.5791
	50.4259	4.9058	2.6872
	50.4599	4.8996	2.6402
	50.4949	4.9002	2.9437
	50.5299	4.8867	3.051
	50.5649	4.8885	3.1587
	50.5999	4.8775	3.2519
	50.6349	4.8842	3.2949
	50.6709	4.8893	3.4407
	50.7059	4.8815	3.702
	50.7409	4.8855	3.3174
	50.7759	4.8784	3.5707
	50.8109	4.8786	3.62
	50.8459	4.8734	3.5338
	50.8809	4.8721	3.7513
	50.9159	4.8661	3.9158
	50.9509	4.8604	3.9789
	50.9859	4.8648	3.6215
	51.0209	4.8488	3.9284
	51.0559	4.8563	3.4367
	51.0899	4.8632	3.4926
	51.1249	4.8541	3.3785
	51.1599	4.8546	3.2843
	51.1949	4.8587	3.24
	51.2299	4.8628	3.0755
	51.2649	4.8545	3.3858
	51.2999	4.8622	3.0112
	51.3349	4.8588	3.2059
	51.3699	4.8669	2.7456
	51.4049	4.8584	3.3825
	51.4399	4.8593	3.1854
	51.4749	4.8536	2.9473
	51.5099	4.8615	2.6826
	51.5449	4.8527	3.1267
	51.5809	4.8539	3.4482
	51.6159	4.8475	3.4935
	51.6509	4.8501	3.3382
	51.6859	4.8433	3.2186
	51.7209	4.8496	2.7332
	51.7559	4.8457	2.7388
	51.7909	4.8424	2.7746
	51.8259	4.8465	2.6045
	51.8599	4.847	2.5113
	51.8949	4.8572	2.4638
	51.9309	4.8583	2.3029
	51.9649	4.8566	2.4996
	51.9999	4.8657	2.5397
	52.0349	4.8551	2.763
	52.07	4.8471	2.838
	52.105	4.8448	3.0216
	52.14	4.8278	3.4317
	52.175	4.8146	3.723
	52.21	4.8	4.1848
	52.245	4.8008	4.1122
	52.281	4.78	4.3776
	52.316	4.7798	4.0252
	52.35	4.7737	3.7731
	52.385	4.7677	3.9363
	52.42	4.7683	3.6573
	52.455	4.7716	3.4314
	52.49	4.7682	3.4795
	52.524	4.7841	3.0133
	52.559	4.7799	3.13
	52.595	4.7905	3.0506
	52.63	4.7714	3.4782
	52.665	4.7808	3.4804
	52.7	4.7702	3.6299
	52.735	4.7781	3.3348
	52.77	4.7576	3.8365
	52.804	4.7513	3.6511
	52.839	4.7552	3.7801
	52.874	4.7463	3.9437
	52.908	4.737	3.9895
	52.943	4.7402	3.9193
	52.979	4.7286	3.9886
	53.013	4.7303	3.7778
	53.047	4.7321	3.6639
	53.082	4.7216	3.4101
	53.117	4.7152	3.6716
	53.152	4.7138	3.6224
	53.187	4.7123	3.2084
	53.222	4.7096	3.1213
	53.257	4.7191	2.8184
	53.293	4.713	3.237
	53.328	4.7229	2.7147
	53.364	4.718	3.1194
	53.397	4.7081	3.1564
	53.431	4.7036	3.5024
	53.466	4.6979	3.338
	53.501	4.6854	3.6203
	53.536	4.6731	3.7366
	53.571	4.6679	3.6562
	53.606	4.6751	3.7023
	53.641	4.6702	3.2806
	53.677	4.666	3.2165
	53.711	4.664	2.9621
	53.746	4.6569	2.8964
	53.781	4.6623	2.6163
	53.8161	4.675	2.5668
	53.8511	4.6774	2.6019
	53.8861	4.6632	2.8835
	53.9211	4.685	2.4674
	53.9561	4.6737	2.8688
	53.9911	4.665	2.9423
	54.0261	4.6609	3.2483
	54.0611	4.6733	2.8301
	54.0961	4.6574	3.1268
	54.1311	4.6609	2.8854
	54.1651	4.6575	2.8286
	54.2001	4.6585	2.902
	54.2351	4.6641	2.5995
	54.2701	4.6608	2.6372
	54.3051	4.6565	3
	54.3411	4.6601	2.8115
	54.3761	4.6587	2.648
	54.4111	4.6634	2.6529
	54.4461	4.6708	2.6919
	54.4801	4.6606	2.7919
	54.5141	4.6747	2.519
	54.5491	4.6774	2.5712
	54.5831	4.6648	2.9424
	54.6181	4.6696	2.5113
	54.6531	4.6678	2.8482
	54.6871	4.6665	2.8809
	54.7221	4.663	3.1736
	54.7561	4.6666	3.086
	54.7911	4.6621	3.3719
	54.8271	4.6708	3.0156
	54.8611	4.662	3.0247
	54.8961	4.6704	2.7973
	54.9311	4.6597	2.9083
	54.9661	4.657	3.058
	55.0011	4.6531	2.9796
	55.0361	4.6559	2.7695
	55.0721	4.649	2.9887
	55.1071	4.6349	3.1406
	55.1421	4.6324	3.4129
	55.1771	4.6265	3.5758
	55.2121	4.6201	3.7184
	55.2471	4.6138	3.9044
	55.2811	4.6123	4.0902
	55.3161	4.6109	3.8146
	55.3521	4.6153	4.0203
	55.3891	4.6135	3.6683
	55.4231	4.6103	3.6864
	55.4581	4.5977	3.8646
	55.4931	4.6079	3.6374
	55.5271	4.5873	3.8315
	55.5622	4.6019	3.5281
	55.5972	4.6002	3.484
	55.6322	4.6061	3.1802
	55.6672	4.5964	3.4479
	55.7022	4.5994	3.4616
	55.7372	4.5906	3.3707
	55.7722	4.583	3.9372
	55.8072	4.5824	3.8615
	55.8422	4.5622	3.6377
	55.8772	4.5689	3.4952
	55.9122	4.5658	3.3244
	55.9472	4.5684	3.3026
	55.9822	4.5682	3.0082
	56.0182	4.5491	3.5189
	56.0522	4.5551	3.5276
	56.0872	4.5504	3.4696
	56.1222	4.549	3.646
	56.1572	4.542	3.6314
	56.1922	4.5431	3.4015
	56.2272	4.5387	3.5581
	56.2622	4.5411	3.2313
	56.2972	4.5365	3.2271
	56.3322	4.5364	3.2953
	56.3672	4.5332	3.416
	56.4022	4.5269	3.4294
	56.4372	4.53	3.5217
	56.4732	4.5285	3.345
	56.5072	4.5233	3.3989
	56.5422	4.5241	3.3335
	56.5762	4.511	3.4696
	56.6112	4.5122	3.4314
	56.6462	4.5107	3.3776
	56.6812	4.5	3.4629
	56.7162	4.5078	3.3299
	56.7512	4.5037	3.242
	56.7862	4.4913	3.4018
	56.8212	4.479	3.4993
	56.8552	4.4782	3.3725
	56.8892	4.4705	3.7157
	56.9242	4.4654	3.4966
	56.9582	4.4683	3.3069
	56.9932	4.4703	3.6129
	57.0272	4.4677	3.2848
	57.0622	4.4678	3.4003
	57.0972	4.463	3.4421
	57.1312	4.4543	3.5035
	57.1662	4.4585	3.4564
	57.2022	4.4513	3.6346
	57.2372	4.453	3.4507
	57.2722	4.4494	3.3993
	57.3073	4.4487	3.4173
	57.3423	4.4442	3.0927
	57.3773	4.4341	3.207
	57.4123	4.4343	3.0971
	57.4473	4.4325	2.9243
	57.4813	4.4328	3.1681
	57.5173	4.4372	2.9468
	57.5533	4.4375	3.1115
	57.5883	4.4356	2.857
	57.6233	4.4273	3.0847
	57.6583	4.4171	3.0093
	57.6933	4.4185	3.1725
	57.7283	4.4198	3.3997
	57.7633	4.42	3.1336
	57.7983	4.4126	3.4953
	57.8333	4.4039	3.5194
	57.8693	4.3952	3.4101
	57.9043	4.3964	3.4648
	57.9393	4.3877	3.3548
	57.9743	4.3874	3.5949
	58.0093	4.3798	3.8007
	58.0443	4.3754	3.5917
	58.0793	4.3712	3.7059
	58.1143	4.3729	3.5138
	58.1493	4.3727	3.5547
	58.1853	4.367	3.6409
	58.2193	4.3666	3.5647
	58.2543	4.361	3.8366
	58.2893	4.358	3.4563
	58.3243	4.3518	3.2318
	58.3583	4.3547	3.1692
	58.3933	4.3403	3.5147
	58.4283	4.3417	3.4484
	58.4633	4.3437	3.2333
	58.4993	4.3388	3.2949
	58.5343	4.3277	3.3464
	58.5693	4.3296	3.2915
	58.6033	4.3267	3.2791
	58.6373	4.3243	3.2382
	58.6723	4.3193	3.1843
	58.7073	4.32	2.9584
	58.7423	4.3144	3.0194
	58.7773	4.3141	3.1812
	58.8133	4.3185	2.9465
	58.8473	4.3129	3.0617
	58.8833	4.3117	3.2867
	58.9183	4.3056	3.2189
	58.9533	4.3022	3.3954
	58.9883	4.2895	3.6905
	59.0233	4.2896	3.6686
	59.0584	4.2799	3.8881
	59.0924	4.2807	3.6647
	59.1274	4.282	3.9529
	59.1624	4.2754	3.8567
	59.1974	4.2756	3.8661
	59.2324	4.2749	3.7236
	59.2674	4.2755	3.5189
	59.3024	4.2632	3.3875
	59.3374	4.2563	3.7349
	59.3724	4.2503	3.4921
	59.4074	4.2478	3.1373
	59.4424	4.2421	3.6577
	59.4774	4.2408	3.1375
	59.5124	4.2342	3.3288
	59.5474	4.2303	3.3847
	59.5824	4.2255	3.614
	59.6164	4.2222	3.5571
	59.6514	4.2144	3.7019
	59.6864	4.215	3.7695
	59.7214	4.2132	3.3349
	59.7554	4.209	3.2504
	59.7904	4.207	3.544
	59.8254	4.1988	3.5251
	59.8604	4.1946	3.5132
	59.8954	4.1873	3.5795
	59.9304	4.1843	3.5085
	59.9654	4.178	3.4731
	60.0004	4.19	3.1795
	60.0354	4.1809	3.321
	60.0704	4.1815	3.2428
	60.1054	4.1788	3.438
	60.1404	4.1795	3.4422
	60.1754	4.1687	3.5537
	60.2104	4.165	3.7594
	60.2464	4.1613	4.3733
	60.2814	4.1481	3.4533
	60.3154	4.1486	4.0117
	60.3504	4.138	3.5108
	60.3844	4.1383	3.0667
	60.4194	4.1302	3.7106
	60.4544	4.1333	3.0562
	60.4894	4.1304	2.6319
	60.5244	4.1289	3.1626
	60.5594	4.1281	3.31
	60.5944	4.129	2.7556
	60.6294	4.1322	2.8833
	60.6644	4.1305	3.2268
	60.6994	4.1297	3.2539
	60.7344	4.1265	3.3723
	60.7684	4.1221	3.7093
	60.8035	4.1162	3.7084
	60.8385	4.1116	3.5417
	60.8735	4.111	3.7216
	60.9085	4.1066	3.7379
	60.9435	4.103	3.5782
	60.9785	4.1005	3.3846
	61.0135	4.1004	3.3044
	61.0485	4.093	3.4021
	61.0835	4.0866	3.15
	61.1185	4.0802	3.569
	61.1535	4.0813	3.3391
	61.1885	4.0735	3.2572
	61.2235	4.0839	3.061
	61.2585	4.0712	3.2777
	61.2935	4.0617	3.4955
	61.3285	4.0644	3.3692
	61.3635	4.0655	3.2692
	61.3985	4.0565	3.3353
	61.4335	4.0598	3.3852
	61.4675	4.0486	3.373
	61.5025	4.0529	3.3792
	61.5375	4.0538	3.175
	61.5725	4.0536	2.9004
	61.6075	4.0589	2.9975
	61.6435	4.056	2.7462
	61.6775	4.0471	2.7641
	61.7125	4.0429	2.809
	61.7475	4.0466	2.8665
	61.7825	4.041	3.2763
	61.8165	4.043	2.948
	61.8505	4.04	3.0218
	61.8855	4.0465	2.989
	61.9195	4.0382	3.2501
	61.9545	4.0438	3.018
	61.9905	4.0395	3.0602
	62.0245	4.0342	3.3197
	62.0595	4.0267	3.6208
	62.0945	4.0188	3.7234
	62.1295	4.0252	3.5729
	62.1645	4.0153	3.7482
	62.1985	4.0195	3.8402
	62.2335	4.0196	3.5536
	62.2685	4.0068	3.4789
	62.3035	4.0081	3.4709
	62.3385	4.0073	3.4393
	62.3735	3.9967	3.6378
	62.4085	3.9923	3.5722
	62.4435	3.9953	3.5869
	62.4785	3.991	3.8723
	62.5135	3.9878	3.4097
	62.5486	3.9838	3.4802
	62.5836	3.9761	3.4976
	62.6186	3.9718	3.7623
	62.6536	3.9687	3.6066
	62.6886	3.9632	3.4555
	62.7236	3.9624	3.4095
	62.7586	3.9576	3.5364
	62.7936	3.9473	3.581
	62.8286	3.9471	3.5327
	62.8636	3.9415	3.3864
	62.8986	3.9418	3.055
	62.9336	3.9376	3.0546
	62.9686	3.9347	2.9986
	63.0036	3.9391	2.9608
	63.0386	3.944	2.6598
	63.0736	3.9399	2.8154
	63.1086	3.9378	2.8469
	63.1436	3.9302	2.9937
	63.1786	3.931	2.8298
	63.2136	3.9346	2.6496
	63.2486	3.9272	2.7114
	63.2836	3.9201	2.8178
	63.3186	3.9265	2.8327
	63.3536	3.9308	2.5746
	63.3886	3.9265	2.7283
	63.4236	3.9292	2.7756
	63.4586	3.9253	3.0751
	63.4936	3.9306	2.7557
	63.5286	3.9265	3.0282
	63.5636	3.923	3.0628
	63.5986	3.9226	3.1677
	63.6336	3.916	3.3625
	63.6686	3.9203	3.2032
	63.7036	3.9221	3.1202
	63.7386	3.9182	3.0275
	63.7736	3.9213	3.2794
	63.8086	3.9168	3.096
	63.8436	3.9109	3.369
	63.8786	3.9135	3.0515
	63.9136	3.9093	3.1815
	63.9486	3.9096	3.21
	63.9836	3.9057	2.9906
	64.0186	3.9017	3.2538
	64.0536	3.8925	3.1369
	64.0886	3.8912	3.1539
	64.1236	3.8854	3.322
	64.1586	3.8883	3.4485
	64.1936	3.879	3.3795
	64.2286	3.8754	3.2509
	64.2636	3.8801	3.2487
	64.2987	3.8751	3.4093
	64.3337	3.876	3.3711
	64.3687	3.8711	3.5128
	64.4037	3.8651	3.5205
	64.4387	3.8601	3.3517
	64.4737	3.8612	3.2886
	64.5087	3.8581	3.3981
	64.5437	3.8507	3.2748
	64.5777	3.8419	3.3996
	64.6127	3.8422	3.4809
	64.6487	3.8423	3.4549
	64.6837	3.8448	3.6368
	64.7187	3.8404	3.9513
	64.7537	3.8437	3.4691
	64.7877	3.8408	3.4342
	64.8227	3.845	3.3306
	64.8577	3.8365	3.6212
	64.8927	3.8284	3.493
	64.9277	3.8264	3.7088
	64.9627	3.823	3.1614
	64.9977	3.8266	2.9972
	65.0327	3.821	3.2708
	65.0687	3.818	3.3784
	65.1027	3.8165	3.3712
	65.1377	3.8111	3.1961
	65.1727	3.8063	3.4419
	65.2067	3.8053	3.3777
	65.2417	3.8024	3.2016
	65.2767	3.7976	3.2995
	65.3117	3.7917	3.6923
	65.3477	3.7871	3.5813
	65.3827	3.7888	3.5822
	65.4177	3.7876	3.7561
	65.4527	3.7878	3.4507
	65.4877	3.785	3.3036
	65.5227	3.7791	3.4465
	65.5577	3.7801	3.0864
	65.5917	3.7756	3.1079
	65.6267	3.7748	2.9521
	65.6617	3.7684	2.8823
	65.6967	3.7688	2.9391
	65.7317	3.7734	2.9154
	65.7677	3.7696	2.7562
	65.8017	3.7733	2.9674
	65.8367	3.7658	3.2948
	65.8717	3.7655	3.3414
	65.9057	3.7632	3.562
	65.9407	3.7594	3.5584
	65.9757	3.759	3.4985
	66.0107	3.7572	3.5091
	66.0468	3.7539	3.3913
	66.0808	3.7551	3.2348
	66.1158	3.7508	3.2327
	66.1508	3.7567	3.3213
	66.1858	3.7508	3.2158
	66.2208	3.7492	3.3418
	66.2558	3.75	3.3906
	66.2908	3.7475	3.258
	66.3258	3.7511	3.0503
	66.3618	3.7441	3.1462
	66.3968	3.7432	2.9605
	66.4328	3.7471	2.996
	66.4668	3.7481	3.0028
	66.5018	3.7509	2.8042
	66.5368	3.7468	2.9851
	66.5718	3.7463	2.9779
	66.6058	3.746	3.0419
	66.6408	3.7498	3.1655
	66.6758	3.7443	3.3663
	66.7118	3.7409	3.6181
	66.7468	3.7384	3.2983
	66.7818	3.7378	3.6231
	66.8168	3.7329	3.3864
	66.8518	3.7313	3.6325
	66.8868	3.7265	3.1686
	66.9218	3.7277	3.3817
	66.9568	3.725	3.3033
	66.9928	3.7271	3.2511
	67.0288	3.727	3.108
	67.0638	3.7176	3.0417
	67.0978	3.7188	3.0549
	67.1328	3.7238	3.0309
	67.1678	3.7176	3.0468
	67.2028	3.7127	3.2059
	67.2378	3.7119	3.1326
	67.2718	3.7113	3.0347
	67.3068	3.7118	2.8929
	67.3418	3.7072	2.9745
	67.3768	3.7117	2.6799
	67.4128	3.7002	3.2209
	67.4468	3.7007	2.8059
	67.4808	3.6918	3.1999
	67.5158	3.6943	3.0291
	67.5508	3.6974	2.7905
	67.5848	3.6994	2.5103
	67.6198	3.7017	2.5487
	67.6538	3.6963	2.623
	67.6878	3.6996	2.6372
	67.7228	3.7062	2.3972
	67.7578	3.7095	2.7899
	67.7928	3.7042	2.899
	67.8269	3.7001	2.9981
	67.8619	3.7008	2.881
	67.8969	3.6997	3.1127
	67.9319	3.6955	3.2802
	67.9669	3.6961	3.2274
	68.0019	3.6948	3.2797
	68.0369	3.6856	3.2544
	68.0719	3.6841	3.1959
	68.1069	3.6847	3.2404
	68.1419	3.6866	3.0307
	68.1769	3.6876	2.8722
	68.2119	3.6834	3.0995
	68.2459	3.6879	3.0898
	68.2809	3.6839	3.4406
	68.3149	3.6839	3.6738
	68.3499	3.6881	3.4458
	68.3839	3.6866	3.9072
	68.4189	3.6801	3.8324
	68.4539	3.6714	3.819
	68.4879	3.6732	3.6752
	68.5239	3.6673	3.9288
	68.5579	3.6667	3.7504
	68.5929	3.6671	3.1164
	68.6279	3.6688	3.181
	68.6629	3.6638	3.3026
	68.6979	3.6575	3.3175
	68.7329	3.6521	3.3473
	68.7679	3.6555	3.3747
	68.8029	3.6566	3.4124
	68.8389	3.6517	3.1956
	68.8749	3.6504	3.4831
	68.9099	3.6519	3.282
	68.9449	3.6501	3.3095
	68.9789	3.6405	3.4924
	69.0139	3.642	3.2144
	69.0489	3.6423	3.3201
	69.0839	3.6407	3.2971
	69.1179	3.637	3.2825
	69.1529	3.6298	3.4545
	69.1879	3.6335	3.1216
	69.2229	3.6311	3.0425
	69.2579	3.6322	2.9686
	69.2929	3.6325	2.9613
	69.3279	3.629	3.0374
	69.3629	3.6295	3.0216
	69.3979	3.6276	2.8767
	69.4329	3.6305	2.8516
	69.4679	3.6227	2.6866
	69.5029	3.6224	2.937
	69.538	3.6246	2.734
	69.573	3.6235	2.8297
	69.608	3.6246	2.5654
	69.643	3.6195	2.9109
	69.678	3.6236	2.8787
	69.712	3.6254	3.0623
	69.747	3.6246	3.1133
	69.782	3.623	3.1013
[truncated: 1,150 more rows]

## Sheet: Fig 5C
		Average length reduction rate, nm/s	SD, nm/s	Average length reduction rate, mon/s	Normalized SD, mon/s	N
	RecA-dsDNA	67.3955	4.45411	137.54	9.09	4
	RecA-ssDNA	0.82	0.19183	0.63	0.146	4
