# Supplementary material for: A new insight into RecA filament regulation by RecX from the analysis of conformation-specific interactions
Source: eLife journal article supplement (doi:10.7554/elife.78409), 2022-06-22
Supplement: supp [file elife_poa_e78409_Source_code_1.docx]

//open an image and apply rotation if needed to align beads parallel to horizontal axis

//background subtraction

makeRectangle(0, 0, 8, 52);

getRawStatistics(nPixels, mean, min, max, std, histogram);

makeRectangle(0, 0, 192, 52);

run("Subtract...", "value=mean");

//choosing central area for mean intensity analysis

//makeRectangle(83, 25, 11, 6); //apo

//makeRectangle(76, 25, 31, 6); //ATP

//makeRectangle(85, 20, 31, 6); //ATPgS

getRawStatistics(nPixels, mean, min, max, std, histogram);

print(mean);
